# Supplementary material for: De novo Transcriptome Analysis of Sinapis alba in Revealing the Glucosinolate and Phytochelatin Pathways
Source: Front Plant Sci. 2016 Mar 4;7:259. doi: 10.3389/fpls.2016.00259 (PMC4777875; doi:10.3389/fpls.2016.00259)
Supplement: Supplementary file 1 [file Table1.XLSX]

## Sheet: Table S1
Table S1 Primers for qPCR analysis.
gene	primer-F			primer-R			Length
MAM1	ACCGCTTGAAGAGGTCGTGA			TGGCGTGTGTCTATTCTTGT			84
CYP79F1	AGGCTTGTTCAGGAATCCGA			TCTTGACGAGCCACATGAGT			116
GSTF11	AGTGGATGGAAGTTGAGGCT			TCGAACTTGGGCGTAAACAC			82
GSTU20	CATCGAGGCAGAGAGTCCAA			TCCTAAACTCAGCGGCGTAA			119
ST5a	TGCCGTTTGTGAAGAGGTTG			TTCGCATAAACAGCAGGACG			172
AOP2	CCAAACGCAGGTCACATCAT			GTAGATCGAGCCCTACGACC			134
GS-OH	GCATCCTCCAACAAGTGCAA			GGGGTCTCTCTGTACTTGGG			84
MYB28	TGTCCGATGTGTCCCAAGAA			ACTTGACCAACCCTCGAAGT			83
MYB29	AAGGAGCATGGACCATCGAA			TCTGCTCCTCCTCGTAGCTA			189
GGT	TAACGATCTTCCGGTCCGAG			CACGTCGTCTGAAACCGATC			182
pepA	CGAGGAGCAATGCAAAGAGT			TGTTGTAGCCACCACTGTCA			170
gshA	TCCTTGTCTCCCAGGTGAAC			CAGCGCCTCTCATCTCCATA			107
phytochelatin synthase	TACCGGCGATCTCTTCCTTC			GGCCCTTTCCATTTACGTCC			213
GPX	CGAGCACAGCACCAATCTAC			CCTCTCAACGACCTTTCCCT			119
PGD	TTGCCAGCGAACCTTGTCC			TGTCTTGCGATCTTGAACCAC			111
GAPDH	ACTAACTGCCTTGCTCCACT			AGCAGTGATAGAGTGGACGG			90

## Sheet: Table S2
Table S2 Unigene expression levels and annotations.
geneID	geneLength	root_rawreads(29934730)	root_RPKM	stem_rawreads(31541457)	stem_RPKM	leaf_rawreads(29203948)	leaf_RPKM	Nr-ID	Nr-Score	Nr-Evalue	Nr-annotation	Nt-ID	Nt-Score	Nt-Evalue	Nt-annotation	Swissprot-ID	Swissprot-Score	Swissprot-Evalue	Swissprot-annotation	COG-Protein-or-Domain	COG-Score	COG-Evalue	COG-ID	COG-Function-Description	KO_id	KEGG-Evalue	KEGG-Score	KEGG-Gene	ko_definition	GO-BiologicalProcess	GO-MolecularFunction	Go-CellularComponent
CL1.Contig1_All	3530	509	4.8169	669	6.0085	2676	25.9579	gi|297798656|ref|XP_002867212.1|	1933.7	0	hypothetical protein ARALYDRAFT_491390 [Arabidopsis lyrata subsp. lyrata] >gi|297313048|gb|EFH43471.1| hypothetical protein ARALYDRAFT_491390 [Arabidopsis lyrata subsp. lyrata]	gi|312282654|dbj|AK353107.1|	3636	0	Thellungiella halophila mRNA, complete cds, clone: RTFL01-17-B14	sp|Q94B78|GCSP2_ARATH	1930	0	Glycine dehydrogenase [decarboxylating] 2, mitochondrial OS=Arabidopsis thaliana GN=At4g33010 PE=1 SV=2	all4607_2	692	0	COG1003	Glycine cleavage system protein P (pyridoxal-binding), C-terminal domain	K00281	0	1933	aly:ARALYDRAFT_491390	glycine dehydrogenase [EC:1.4.4.2]	GO:0045893//positive regulation of transcription, DNA-dependent;GO:0006098//pentose-phosphate shunt;GO:0006636//unsaturated fatty acid biosynthetic process;GO:0043085//positive regulation of catalytic activity;GO:0019252//starch biosynthetic process;GO:0006766//vitamin metabolic process;GO:0000023//maltose metabolic process;GO:0019748//secondary metabolic process;GO:0009106//lipoate metabolic pro…	GO:0005515//protein binding;GO:0004375//glycine dehydrogenase (decarboxylating) activity;GO:0030170//pyridoxal phosphate binding;GO:0005524//ATP binding	GO:0005960//glycine cleavage complex;GO:0009941//chloroplast envelope;GO:0048046//apoplast;GO:0009570//chloroplast stroma;GO:0009534//chloroplast thylakoid;GO:0005739//mitochondrion
CL1.Contig2_All	3439	729	7.0814	861	7.9376	3302	32.8778	gi|567217544|ref|XP_006412401.1|	1936.4	0	hypothetical protein EUTSA_v10024257mg [Eutrema salsugineum] >gi|557113571|gb|ESQ53854.1| hypothetical protein EUTSA_v10024257mg [Eutrema salsugineum]	gi|312282654|dbj|AK353107.1|	3636	0	Thellungiella halophila mRNA, complete cds, clone: RTFL01-17-B14	sp|Q94B78|GCSP2_ARATH	1930	0	Glycine dehydrogenase [decarboxylating] 2, mitochondrial OS=Arabidopsis thaliana GN=At4g33010 PE=1 SV=2	all4607_2	692	0	COG1003	Glycine cleavage system protein P (pyridoxal-binding), C-terminal domain	K00281	0	1933	aly:ARALYDRAFT_491390	glycine dehydrogenase [EC:1.4.4.2]	GO:0045893//positive regulation of transcription, DNA-dependent;GO:0006098//pentose-phosphate shunt;GO:0006636//unsaturated fatty acid biosynthetic process;GO:0043085//positive regulation of catalytic activity;GO:0019252//starch biosynthetic process;GO:0006766//vitamin metabolic process;GO:0000023//maltose metabolic process;GO:0019748//secondary metabolic process;GO:0009106//lipoate metabolic pro…	GO:0005515//protein binding;GO:0004375//glycine dehydrogenase (decarboxylating) activity;GO:0030170//pyridoxal phosphate binding;GO:0005524//ATP binding	GO:0005960//glycine cleavage complex;GO:0009941//chloroplast envelope;GO:0048046//apoplast;GO:0009570//chloroplast stroma;GO:0009534//chloroplast thylakoid;GO:0005739//mitochondrion
CL10.Contig1_All	1129	124	3.669	266	7.4697	633	19.1985	gi|567220356|ref|XP_006413807.1|	553.1	0	hypothetical protein EUTSA_v10025765mg [Eutrema salsugineum] >gi|567220358|ref|XP_006413808.1| hypothetical protein EUTSA_v10025765mg [Eutrema salsugineum] >gi|557114977|gb|ESQ55260.1| hypothetical protein EUTSA_v10025765mg [Eutrema salsugineum] >gi|557114978|gb|ESQ55261.1| hypothetical protein EUTSA_v10025765mg [Eutrema salsugineum]	gi|297799951|ref|XM_002867814.1|	1057	0	Arabidopsis lyrata subsp. lyrata EMB1417, mRNA	sp|Q8LG95|PP332_ARATH	523	0	Pentatricopeptide repeat-containing protein At4g21190 OS=Arabidopsis thaliana GN=EMB1417 PE=2 SV=1	--	--	--	--	--	--	--	--	--	--	GO:0009793//embryo development ending in seed dormancy	-	GO:0005739//mitochondrion
CL10.Contig2_All	1303	103	2.6407	136	3.3091	517	13.5864	gi|567220356|ref|XP_006413807.1|	551.6	0	hypothetical protein EUTSA_v10025765mg [Eutrema salsugineum] >gi|567220358|ref|XP_006413808.1| hypothetical protein EUTSA_v10025765mg [Eutrema salsugineum] >gi|557114977|gb|ESQ55260.1| hypothetical protein EUTSA_v10025765mg [Eutrema salsugineum] >gi|557114978|gb|ESQ55261.1| hypothetical protein EUTSA_v10025765mg [Eutrema salsugineum]	gi|297799951|ref|XM_002867814.1|	1011	0	Arabidopsis lyrata subsp. lyrata EMB1417, mRNA	sp|Q8LG95|PP332_ARATH	523	0	Pentatricopeptide repeat-containing protein At4g21190 OS=Arabidopsis thaliana GN=EMB1417 PE=2 SV=1	--	--	--	--	--	--	--	--	--	--	GO:0009793//embryo development ending in seed dormancy	-	GO:0005739//mitochondrion
CL100.Contig1_All	1866	242	4.3324	220	3.7379	81	1.4864	gi|567175629|ref|XP_006400488.1|	920.6	0	hypothetical protein EUTSA_v10013175mg [Eutrema salsugineum] >gi|557101578|gb|ESQ41941.1| hypothetical protein EUTSA_v10013175mg [Eutrema salsugineum]	gi|199580018|gb|AC189336.2|	1963	0	Brassica rapa subsp. pekinensis clone KBrB039G17, complete sequence	sp|Q9M651|RAGP2_ARATH	910	0	RAN GTPase-activating protein 2 OS=Arabidopsis thaliana GN=RANGAP2 PE=1 SV=2	SPAC22E12.07	81.3	8e-16	COG5238	Ran GTPase-activating protein (RanGAP) involved in mRNA processing and transport	K14319	0	910	ath:AT5G19320	Ran GTPase-activating protein 1	GO:0009651//response to salt stress;GO:0009640//photomorphogenesis;GO:0006913//nucleocytoplasmic transport;GO:0010388//cullin deneddylation;GO:0048527//lateral root development;GO:0009407//toxin catabolic process	GO:0005098//Ran GTPase activator activity	GO:0005774//vacuolar membrane;GO:0005635//nuclear envelope;GO:0009507//chloroplast;GO:0005783//endoplasmic reticulum
CL100.Contig2_All	738	102	4.6171	80	3.4368	82	3.8047	gi|15239712|ref|NP_197433.1|	340.1	3e-113	RAN GTPase-activating protein 2 [Arabidopsis thaliana] >gi|205829463|sp|Q9M651.2|RAGP2_ARATH RecName: Full=RAN GTPase-activating protein 2; Short=AtRanGAP2; Short=RanGAP2 >gi|332005302|gb|AED92685.1| RAN GTPase-activating protein 2 [Arabidopsis thaliana]	gi|332002898|gb|CP002688.1|	502	1e-139	Arabidopsis thaliana chromosome 5, complete sequence	sp|Q9M651|RAGP2_ARATH	340	5e-115	RAN GTPase-activating protein 2 OS=Arabidopsis thaliana GN=RANGAP2 PE=1 SV=2	--	--	--	--	--	K14319	1e-114	340	ath:AT5G19320	Ran GTPase-activating protein 1	GO:0009651//response to salt stress;GO:0009640//photomorphogenesis;GO:0006913//nucleocytoplasmic transport;GO:0010388//cullin deneddylation;GO:0048527//lateral root development;GO:0009407//toxin catabolic process	GO:0005098//Ran GTPase activator activity	GO:0005774//vacuolar membrane;GO:0005635//nuclear envelope;GO:0009507//chloroplast;GO:0005783//endoplasmic reticulum
CL100.Contig3_All	1839	616	11.1898	426	7.3442	194	3.6123	gi|567175629|ref|XP_006400488.1|	897.5	0	hypothetical protein EUTSA_v10013175mg [Eutrema salsugineum] >gi|557101578|gb|ESQ41941.1| hypothetical protein EUTSA_v10013175mg [Eutrema salsugineum]	gi|199580018|gb|AC189336.2|	2187	0	Brassica rapa subsp. pekinensis clone KBrB039G17, complete sequence	sp|Q9M651|RAGP2_ARATH	893	0	RAN GTPase-activating protein 2 OS=Arabidopsis thaliana GN=RANGAP2 PE=1 SV=2	SPAC22E12.07	78.6	6e-15	COG5238	Ran GTPase-activating protein (RanGAP) involved in mRNA processing and transport	K14319	0	893	ath:AT5G19320	Ran GTPase-activating protein 1	GO:0009651//response to salt stress;GO:0009640//photomorphogenesis;GO:0006913//nucleocytoplasmic transport;GO:0010388//cullin deneddylation;GO:0048527//lateral root development;GO:0009407//toxin catabolic process	GO:0005098//Ran GTPase activator activity	GO:0005774//vacuolar membrane;GO:0005635//nuclear envelope;GO:0009507//chloroplast;GO:0005783//endoplasmic reticulum
CL100.Contig4_All	1824	458	8.3881	388	6.7441	240	4.5055	gi|15239712|ref|NP_197433.1|	895.2	0	RAN GTPase-activating protein 2 [Arabidopsis thaliana] >gi|205829463|sp|Q9M651.2|RAGP2_ARATH RecName: Full=RAN GTPase-activating protein 2; Short=AtRanGAP2; Short=RanGAP2 >gi|332005302|gb|AED92685.1| RAN GTPase-activating protein 2 [Arabidopsis thaliana]	gi|199580018|gb|AC189336.2|	1879	0	Brassica rapa subsp. pekinensis clone KBrB039G17, complete sequence	sp|Q9M651|RAGP2_ARATH	895	0	RAN GTPase-activating protein 2 OS=Arabidopsis thaliana GN=RANGAP2 PE=1 SV=2	SPAC22E12.07	86.7	1e-17	COG5238	Ran GTPase-activating protein (RanGAP) involved in mRNA processing and transport	K14319	0	895	ath:AT5G19320	Ran GTPase-activating protein 1	GO:0009651//response to salt stress;GO:0009640//photomorphogenesis;GO:0006913//nucleocytoplasmic transport;GO:0010388//cullin deneddylation;GO:0048527//lateral root development;GO:0009407//toxin catabolic process	GO:0005098//Ran GTPase activator activity	GO:0005774//vacuolar membrane;GO:0005635//nuclear envelope;GO:0009507//chloroplast;GO:0005783//endoplasmic reticulum
CL1000.Contig1_All	2447	82	1.1194	42	0.5442	6	0.084	gi|567191211|ref|XP_006404856.1|	1196	0	hypothetical protein EUTSA_v10000068mg [Eutrema salsugineum] >gi|557105984|gb|ESQ46309.1| hypothetical protein EUTSA_v10000068mg [Eutrema salsugineum]	gi|30682159|ref|NM_127933.2|	1548	0	Arabidopsis thaliana uncharacterized protein mRNA, complete cds	--	--	--	--	--	--	--	--	--	--	--	--	--	--	-	-	GO:0005634//nucleus
CL1000.Contig2_All	2458	12	0.1631	16	0.2064	6	0.0836	gi|567191211|ref|XP_006404856.1|	1196	0	hypothetical protein EUTSA_v10000068mg [Eutrema salsugineum] >gi|557105984|gb|ESQ46309.1| hypothetical protein EUTSA_v10000068mg [Eutrema salsugineum]	gi|30682159|ref|NM_127933.2|	1548	0	Arabidopsis thaliana uncharacterized protein mRNA, complete cds	--	--	--	--	--	--	--	--	--	--	--	--	--	--	-	-	GO:0005634//nucleus
CL1000.Contig3_All	433	24	1.8516	15	1.0983	8	0.6326	gi|567191211|ref|XP_006404856.1|	73.6	3e-14	hypothetical protein EUTSA_v10000068mg [Eutrema salsugineum] >gi|557105984|gb|ESQ46309.1| hypothetical protein EUTSA_v10000068mg [Eutrema salsugineum]	gi|30682159|ref|NM_127933.2|	115	5e-23	Arabidopsis thaliana uncharacterized protein mRNA, complete cds	--	--	--	--	--	--	--	--	--	--	--	--	--	--	-	-	GO:0005634//nucleus
CL1001.Contig1_All	1429	560	13.0912	318	7.0553	27	0.647	gi|567166539|ref|XP_006397852.1|	691.8	0	hypothetical protein EUTSA_v10001503mg [Eutrema salsugineum] >gi|557098925|gb|ESQ39305.1| hypothetical protein EUTSA_v10001503mg [Eutrema salsugineum]	gi|312282158|dbj|AK352859.1|	1602	0	Thellungiella halophila mRNA, complete cds, clone: RTFL01-17-N20	sp|Q9ZPY0|DOF25_ARATH	637	0	Dof zinc finger protein DOF2.5 OS=Arabidopsis thaliana GN=DOF2.5 PE=2 SV=3	--	--	--	--	--	--	--	--	--	--	GO:0006598//polyamine catabolic process;GO:0009845//seed germination;GO:0009409//response to cold;GO:0009698//phenylpropanoid metabolic process;GO:0006355//regulation of transcription, DNA-dependent;GO:0042398//cellular modified amino acid biosynthetic process;GO:0009639//response to red or far red light	GO:0003677//DNA binding;GO:0003700//sequence-specific DNA binding transcription factor activity	GO:0005634//nucleus
CL1001.Contig2_All	410	95	7.7404	69	5.3356	10	0.8352	gi|312282159|dbj|BAJ33945.1|	249.6	4e-82	unnamed protein product [Thellungiella halophila]	gi|312282158|dbj|AK352859.1|	555	1e-155	Thellungiella halophila mRNA, complete cds, clone: RTFL01-17-N20	sp|Q9ZPY0|DOF25_ARATH	202	3e-65	Dof zinc finger protein DOF2.5 OS=Arabidopsis thaliana GN=DOF2.5 PE=2 SV=3	--	--	--	--	--	--	--	--	--	--	GO:0006598//polyamine catabolic process;GO:0009845//seed germination;GO:0009409//response to cold;GO:0009698//phenylpropanoid metabolic process;GO:0006355//regulation of transcription, DNA-dependent;GO:0042398//cellular modified amino acid biosynthetic process;GO:0009639//response to red or far red light	GO:0003677//DNA binding;GO:0003700//sequence-specific DNA binding transcription factor activity	GO:0005634//nucleus
CL1001.Contig3_All	1479	246	5.5564	92	1.9721	4	0.0926	gi|567166539|ref|XP_006397852.1|	618.6	0	hypothetical protein EUTSA_v10001503mg [Eutrema salsugineum] >gi|557098925|gb|ESQ39305.1| hypothetical protein EUTSA_v10001503mg [Eutrema salsugineum]	gi|312282158|dbj|AK352859.1|	1330	0	Thellungiella halophila mRNA, complete cds, clone: RTFL01-17-N20	sp|Q9ZPY0|DOF25_ARATH	585	0	Dof zinc finger protein DOF2.5 OS=Arabidopsis thaliana GN=DOF2.5 PE=2 SV=3	--	--	--	--	--	--	--	--	--	--	GO:0006598//polyamine catabolic process;GO:0009845//seed germination;GO:0009409//response to cold;GO:0009698//phenylpropanoid metabolic process;GO:0006355//regulation of transcription, DNA-dependent;GO:0042398//cellular modified amino acid biosynthetic process;GO:0009639//response to red or far red light	GO:0003677//DNA binding;GO:0003700//sequence-specific DNA binding transcription factor activity	GO:0005634//nucleus
CL1001.Contig4_All	1512	622	13.7424	229	4.8018	4	0.0906	gi|567166539|ref|XP_006397852.1|	621.3	0	hypothetical protein EUTSA_v10001503mg [Eutrema salsugineum] >gi|557098925|gb|ESQ39305.1| hypothetical protein EUTSA_v10001503mg [Eutrema salsugineum]	gi|312282158|dbj|AK352859.1|	1394	0	Thellungiella halophila mRNA, complete cds, clone: RTFL01-17-N20	sp|Q9ZPY0|DOF25_ARATH	592	0	Dof zinc finger protein DOF2.5 OS=Arabidopsis thaliana GN=DOF2.5 PE=2 SV=3	--	--	--	--	--	--	--	--	--	--	GO:0006598//polyamine catabolic process;GO:0009845//seed germination;GO:0009409//response to cold;GO:0009698//phenylpropanoid metabolic process;GO:0006355//regulation of transcription, DNA-dependent;GO:0042398//cellular modified amino acid biosynthetic process;GO:0009639//response to red or far red light	GO:0003677//DNA binding;GO:0003700//sequence-specific DNA binding transcription factor activity	GO:0005634//nucleus
CL1001.Contig5_All	1587	261	5.494	94	1.8779	3	0.0647	gi|567182578|ref|XP_006402435.1|	569.7	0	hypothetical protein EUTSA_v10006092mg [Eutrema salsugineum] >gi|557103534|gb|ESQ43888.1| hypothetical protein EUTSA_v10006092mg [Eutrema salsugineum]	gi|379323231|gb|JN979481.1|	708	0	Brassica rapa subsp. pekinensis auxin response factor 18-1 (ARF18-1) mRNA, complete cds	sp|Q43385|DOF37_ARATH	512	0	Dof zinc finger protein DOF3.7 OS=Arabidopsis thaliana GN=DOF3.7 PE=1 SV=2	--	--	--	--	--	--	--	--	--	--	GO:0006598//polyamine catabolic process;GO:0009845//seed germination;GO:0009409//response to cold;GO:0009698//phenylpropanoid metabolic process;GO:0006355//regulation of transcription, DNA-dependent;GO:0042398//cellular modified amino acid biosynthetic process;GO:0009639//response to red or far red light	GO:0003677//DNA binding;GO:0003700//sequence-specific DNA binding transcription factor activity	GO:0005634//nucleus
CL1001.Contig6_All	1536	294	6.3941	63	1.3004	3	0.0669	gi|297817518|ref|XP_002876642.1|	501.5	5e-176	hypothetical protein ARALYDRAFT_486687 [Arabidopsis lyrata subsp. lyrata] >gi|297322480|gb|EFH52901.1| hypothetical protein ARALYDRAFT_486687 [Arabidopsis lyrata subsp. lyrata]	gi|145339754|ref|NM_116050.3|	1051	0	Arabidopsis thaliana Dof zinc finger protein DOF3.7 mRNA, complete cds	sp|Q43385|DOF37_ARATH	499	6e-177	Dof zinc finger protein DOF3.7 OS=Arabidopsis thaliana GN=DOF3.7 PE=1 SV=2	--	--	--	--	--	--	--	--	--	--	GO:0006598//polyamine catabolic process;GO:0009845//seed germination;GO:0009409//response to cold;GO:0009698//phenylpropanoid metabolic process;GO:0006355//regulation of transcription, DNA-dependent;GO:0042398//cellular modified amino acid biosynthetic process;GO:0009639//response to red or far red light	GO:0003677//DNA binding;GO:0003700//sequence-specific DNA binding transcription factor activity	GO:0005634//nucleus
CL1001.Contig7_All	1608	545	11.3223	123	2.4251	12	0.2555	gi|186511318|ref|NP_001118885.1|	593.6	0	Dof zinc finger protein DOF3.7 [Arabidopsis thaliana] >gi|332646748|gb|AEE80269.1| Dof zinc finger protein DOF3.7 [Arabidopsis thaliana]	gi|379323231|gb|JN979481.1|	1441	0	Brassica rapa subsp. pekinensis auxin response factor 18-1 (ARF18-1) mRNA, complete cds	sp|Q43385|DOF37_ARATH	532	0	Dof zinc finger protein DOF3.7 OS=Arabidopsis thaliana GN=DOF3.7 PE=1 SV=2	--	--	--	--	--	--	--	--	--	--	GO:0006598//polyamine catabolic process;GO:0009845//seed germination;GO:0009409//response to cold;GO:0009698//phenylpropanoid metabolic process;GO:0006355//regulation of transcription, DNA-dependent;GO:0042398//cellular modified amino acid biosynthetic process;GO:0009639//response to red or far red light	GO:0003677//DNA binding;GO:0003700//sequence-specific DNA binding transcription factor activity	GO:0005634//nucleus
CL1002.Contig1_All	1601	103	2.1492	709	14.0402	4325	92.5024	gi|567211263|ref|XP_006410305.1|	862.1	0	hypothetical protein EUTSA_v10016638mg [Eutrema salsugineum] >gi|557111474|gb|ESQ51758.1| hypothetical protein EUTSA_v10016638mg [Eutrema salsugineum]	gi|21403397|gb|AY084687.1|	1413	0	Arabidopsis thaliana clone 114997 mRNA, complete sequence	sp|Q9SKC5|U74D1_ARATH	833	0	UDP-glycosyltransferase 74D1 OS=Arabidopsis thaliana GN=UGT74D1 PE=1 SV=1	BS_yojK	49.3	9e-06	COG1819	Glycosyl transferases, related to UDP-glucuronosyltransferase	K13691	8e-141	415	pop:POPTR_810275	pathogen-inducible salicylic acid glucosyltransferase [EC:2.4.1.-]	GO:0071215//cellular response to abscisic acid stimulus;GO:0070301//cellular response to hydrogen peroxide;GO:0010016//shoot system morphogenesis;GO:0071475//cellular hyperosmotic salinity response;GO:0042631//cellular response to water deprivation;GO:0010583//response to cyclopentenone;GO:0009407//toxin catabolic process;GO:0080024//indolebutyric acid metabolic process;GO:0080167//response to ka…	GO:0010294//abscisic acid glucosyltransferase activity;GO:0052638//indole-3-butyrate beta-glucosyltransferase activity	-
CL1002.Contig2_All	235	3	0.4265	17	2.2935	21	3.0599	gi|567211263|ref|XP_006410305.1|	159.5	5e-47	hypothetical protein EUTSA_v10016638mg [Eutrema salsugineum] >gi|557111474|gb|ESQ51758.1| hypothetical protein EUTSA_v10016638mg [Eutrema salsugineum]	gi|199580160|gb|AC189463.2|	355	1e-95	Brassica rapa subsp. pekinensis clone KBrB074K06, complete sequence	sp|Q9SKC5|U74D1_ARATH	154	7e-47	UDP-glycosyltransferase 74D1 OS=Arabidopsis thaliana GN=UGT74D1 PE=1 SV=1	--	--	--	--	--	K13691	6e-38	132	pop:POPTR_810275	pathogen-inducible salicylic acid glucosyltransferase [EC:2.4.1.-]	GO:0071215//cellular response to abscisic acid stimulus;GO:0070301//cellular response to hydrogen peroxide;GO:0010016//shoot system morphogenesis;GO:0071475//cellular hyperosmotic salinity response;GO:0042631//cellular response to water deprivation;GO:0010583//response to cyclopentenone;GO:0009407//toxin catabolic process;GO:0080024//indolebutyric acid metabolic process;GO:0080167//response to ka…	GO:0010294//abscisic acid glucosyltransferase activity;GO:0052638//indole-3-butyrate beta-glucosyltransferase activity;GO:0047215//indole-3-acetate beta-glucosyltransferase activity	-
CL1002.Contig3_All	1463	426	9.7272	324	7.0213	146	3.4172	gi|567211263|ref|XP_006410305.1|	843.6	0	hypothetical protein EUTSA_v10016638mg [Eutrema salsugineum] >gi|557111474|gb|ESQ51758.1| hypothetical protein EUTSA_v10016638mg [Eutrema salsugineum]	gi|145360520|ref|NM_128733.4|	1366	0	Arabidopsis thaliana UDP-glucosyl transferase 74D1 mRNA, complete cds	sp|Q9SKC5|U74D1_ARATH	816	0	UDP-glycosyltransferase 74D1 OS=Arabidopsis thaliana GN=UGT74D1 PE=1 SV=1	--	--	--	--	--	K13691	2e-139	410	pop:POPTR_810275	pathogen-inducible salicylic acid glucosyltransferase [EC:2.4.1.-]	GO:0071215//cellular response to abscisic acid stimulus;GO:0070301//cellular response to hydrogen peroxide;GO:0010016//shoot system morphogenesis;GO:0071475//cellular hyperosmotic salinity response;GO:0042631//cellular response to water deprivation;GO:0010583//response to cyclopentenone;GO:0009407//toxin catabolic process;GO:0080024//indolebutyric acid metabolic process;GO:0080167//response to ka…	GO:0010294//abscisic acid glucosyltransferase activity;GO:0052638//indole-3-butyrate beta-glucosyltransferase activity	-
CL1002.Contig4_All	386	34	2.9425	22	1.807	18	1.5968	gi|21536917|gb|AAM61249.1|	248.1	2e-80	putative glucosyltransferase [Arabidopsis thaliana]	gi|21403397|gb|AY084687.1|	408	1e-111	Arabidopsis thaliana clone 114997 mRNA, complete sequence	sp|Q9SKC5|U74D1_ARATH	243	2e-80	UDP-glycosyltransferase 74D1 OS=Arabidopsis thaliana GN=UGT74D1 PE=1 SV=1	slr1125	48.5	5e-07	COG1819	Glycosyl transferases, related to UDP-glucuronosyltransferase	K13691	9e-61	194	pop:POPTR_810275	pathogen-inducible salicylic acid glucosyltransferase [EC:2.4.1.-]	GO:0071215//cellular response to abscisic acid stimulus;GO:0070301//cellular response to hydrogen peroxide;GO:0010016//shoot system morphogenesis;GO:0071475//cellular hyperosmotic salinity response;GO:0042631//cellular response to water deprivation;GO:0010583//response to cyclopentenone;GO:0009407//toxin catabolic process;GO:0080024//indolebutyric acid metabolic process;GO:0080167//response to ka…	GO:0010294//abscisic acid glucosyltransferase activity;GO:0052638//indole-3-butyrate beta-glucosyltransferase activity;GO:0047215//indole-3-acetate beta-glucosyltransferase activity	-
CL1003.Contig1_All	2316	19	0.2741	0	0	0	0	gi|567213587|ref|XP_006410918.1|	1262.3	0	hypothetical protein EUTSA_v10016295mg [Eutrema salsugineum] >gi|557112087|gb|ESQ52371.1| hypothetical protein EUTSA_v10016295mg [Eutrema salsugineum]	gi|330250293|gb|CP002685.1|	1053	0	Arabidopsis thaliana chromosome 2, complete sequence	sp|Q9ZUT0|AB2G_ARATH	1204	0	ABC transporter G family member 2 OS=Arabidopsis thaliana GN=ABCG2 PE=2 SV=1	YCR011c_2	191	7e-55	COG1131	ABC-type multidrug transport system, ATPase component	K12843	0	1011	vvi:100248403	U4/U6 small nuclear ribonucleoprotein PRP3	GO:0015748;GO:0006200//ATP catabolic process;GO:0015716//organic phosphonate transport;GO:0009624//response to nematode	GO:0015416//organic phosphonate transmembrane-transporting ATPase activity;GO:0005524//ATP binding	GO:0016020//membrane
CL1003.Contig2_All	2364	894	12.6332	5	0.0671	0	0	gi|567213587|ref|XP_006410918.1|	1331.6	0	hypothetical protein EUTSA_v10016295mg [Eutrema salsugineum] >gi|557112087|gb|ESQ52371.1| hypothetical protein EUTSA_v10016295mg [Eutrema salsugineum]	gi|330250293|gb|CP002685.1|	1515	0	Arabidopsis thaliana chromosome 2, complete sequence	sp|Q9ZUT0|AB2G_ARATH	1248	0	ABC transporter G family member 2 OS=Arabidopsis thaliana GN=ABCG2 PE=2 SV=1	YCR011c_2	191	9e-55	COG1131	ABC-type multidrug transport system, ATPase component	K12843	0	993	vvi:100248403	U4/U6 small nuclear ribonucleoprotein PRP3	GO:0015748;GO:0006200//ATP catabolic process;GO:0015716//organic phosphonate transport	GO:0015416//organic phosphonate transmembrane-transporting ATPase activity;GO:0005524//ATP binding	GO:0016020//membrane
CL1003.Contig3_All	436	38	2.9115	1	0.0727	0	0	gi|567186993|ref|XP_006403679.1|	268.5	3e-85	hypothetical protein EUTSA_v10010147mg [Eutrema salsugineum] >gi|557104798|gb|ESQ45132.1| hypothetical protein EUTSA_v10010147mg [Eutrema salsugineum]	gi|297820079|ref|XM_002877877.1|	381	1e-103	Arabidopsis lyrata subsp. lyrata abc transporter family protein, mRNA	sp|Q9LFG8|AB20G_ARATH	263	3e-85	ABC transporter G family member 20 OS=Arabidopsis thaliana GN=ABCG20 PE=2 SV=1	YCR011c_2	108	3e-29	COG1131	ABC-type multidrug transport system, ATPase component	K12843	1e-71	233	vvi:100248403	U4/U6 small nuclear ribonucleoprotein PRP3	GO:0006200//ATP catabolic process	GO:0042626//ATPase activity, coupled to transmembrane movement of substances;GO:0005524//ATP binding	GO:0016020//membrane
CL1004.Contig1_All	446	40	2.9961	61	4.3362	38	2.9175	gi|567149584|ref|XP_006416405.1|	241.5	6e-77	hypothetical protein EUTSA_v10007426mg [Eutrema salsugineum] >gi|557094176|gb|ESQ34758.1| hypothetical protein EUTSA_v10007426mg [Eutrema salsugineum]	gi|145335938|ref|NM_101892.3|	573	1e-161	Arabidopsis thaliana Pseudouridine synthase family protein mRNA, complete cds	--	--	--	--	ECU08g1530	79	1e-17	COG1258	Predicted pseudouridylate synthase	K07583	2e-76	236	aly:ARALYDRAFT_889490	tRNA pseudouridine synthase 10 [EC:5.4.99.-]	GO:0034968//histone lysine methylation;GO:0009909//regulation of flower development;GO:0048449//floral organ formation;GO:0001522//pseudouridine synthesis	GO:0003723//RNA binding;GO:0009982//pseudouridine synthase activity	GO:0005634//nucleus
CL1004.Contig2_All	1630	257	5.2671	245	4.7654	272	5.714	gi|567149584|ref|XP_006416405.1|	860.9	0	hypothetical protein EUTSA_v10007426mg [Eutrema salsugineum] >gi|557094176|gb|ESQ34758.1| hypothetical protein EUTSA_v10007426mg [Eutrema salsugineum]	gi|145335938|ref|NM_101892.3|	1515	0	Arabidopsis thaliana Pseudouridine synthase family protein mRNA, complete cds	--	--	--	--	MTH1322	146	4e-38	COG1258	Predicted pseudouridylate synthase	K07583	0	837	aly:ARALYDRAFT_889490	tRNA pseudouridine synthase 10 [EC:5.4.99.-]	GO:0034968//histone lysine methylation;GO:0009909//regulation of flower development;GO:0048449//floral organ formation;GO:0001522//pseudouridine synthesis	GO:0003723//RNA binding;GO:0009982//pseudouridine synthase activity	GO:0005634//nucleus
CL1004.Contig3_All	466	64	4.588	36	2.4493	35	2.5718	gi|567149584|ref|XP_006416405.1|	251.5	1e-80	hypothetical protein EUTSA_v10007426mg [Eutrema salsugineum] >gi|557094176|gb|ESQ34758.1| hypothetical protein EUTSA_v10007426mg [Eutrema salsugineum]	gi|145335938|ref|NM_101892.3|	462	1e-127	Arabidopsis thaliana Pseudouridine synthase family protein mRNA, complete cds	--	--	--	--	--	--	--	--	--	K07583	2e-75	234	ath:AT1G20410	tRNA pseudouridine synthase 10 [EC:5.4.99.-]	GO:0034968//histone lysine methylation;GO:0009909//regulation of flower development;GO:0048449//floral organ formation;GO:0001522//pseudouridine synthesis	GO:0003723//RNA binding;GO:0009982//pseudouridine synthase activity	GO:0005634//nucleus
CL1005.Contig1_All	1358	0	0	2	0.0467	2	0.0504	gi|301133538|gb|ADK63391.1|	620.9	0	B-box type zinc finger protein [Brassica rapa]	gi|301133537|gb|HM579865.1|	1336	0	Brassica rapa B-box type zinc finger protein (Bbox1) mRNA, complete cds	sp|Q9FHH8|COL5_ARATH	566	0	Zinc finger protein CONSTANS-LIKE 5 OS=Arabidopsis thaliana GN=COL5 PE=2 SV=2	--	--	--	--	--	K12135	5e-67	219	aly:ARALYDRAFT_488429	zinc finger protein CONSTANS	GO:0006355//regulation of transcription, DNA-dependent;GO:0042631//cellular response to water deprivation	GO:0008270//zinc ion binding;GO:0003700//sequence-specific DNA binding transcription factor activity	GO:0005634//nucleus
CL1005.Contig2_All	1413	1053	24.8949	1291	28.9669	1342	32.5214	gi|567178030|ref|XP_006401182.1|	634.4	0	hypothetical protein EUTSA_v10013919mg [Eutrema salsugineum] >gi|557102272|gb|ESQ42635.1| hypothetical protein EUTSA_v10013919mg [Eutrema salsugineum]	gi|199580174|gb|AC189479.2|	1168	0	Brassica rapa subsp. pekinensis clone KBrB081M20, complete sequence	sp|Q9FHH8|COL5_ARATH	587	0	Zinc finger protein CONSTANS-LIKE 5 OS=Arabidopsis thaliana GN=COL5 PE=2 SV=2	--	--	--	--	--	K12135	4e-67	220	aly:ARALYDRAFT_488429	zinc finger protein CONSTANS	GO:0006355//regulation of transcription, DNA-dependent;GO:0042631//cellular response to water deprivation	GO:0008270//zinc ion binding;GO:0003700//sequence-specific DNA binding transcription factor activity	GO:0005634//nucleus
CL1005.Contig3_All	1434	4	0.0932	6	0.1327	4	0.0955	gi|301133538|gb|ADK63391.1|	622.9	0	B-box type zinc finger protein [Brassica rapa]	gi|301133537|gb|HM579865.1|	1352	0	Brassica rapa B-box type zinc finger protein (Bbox1) mRNA, complete cds	sp|Q9FHH8|COL5_ARATH	560	0	Zinc finger protein CONSTANS-LIKE 5 OS=Arabidopsis thaliana GN=COL5 PE=2 SV=2	--	--	--	--	--	K12135	6e-69	225	aly:ARALYDRAFT_488429	zinc finger protein CONSTANS	GO:0006355//regulation of transcription, DNA-dependent;GO:0042631//cellular response to water deprivation	GO:0008270//zinc ion binding;GO:0003700//sequence-specific DNA binding transcription factor activity	GO:0005634//nucleus
CL1005.Contig4_All	1450	8	0.1843	10	0.2187	0	0	gi|567178030|ref|XP_006401182.1|	627.5	0	hypothetical protein EUTSA_v10013919mg [Eutrema salsugineum] >gi|557102272|gb|ESQ42635.1| hypothetical protein EUTSA_v10013919mg [Eutrema salsugineum]	gi|199580174|gb|AC189479.2|	1168	0	Brassica rapa subsp. pekinensis clone KBrB081M20, complete sequence	sp|Q9FHH8|COL5_ARATH	580	0	Zinc finger protein CONSTANS-LIKE 5 OS=Arabidopsis thaliana GN=COL5 PE=2 SV=2	--	--	--	--	--	K12135	4e-69	226	aly:ARALYDRAFT_488429	zinc finger protein CONSTANS	GO:0006355//regulation of transcription, DNA-dependent;GO:0042631//cellular response to water deprivation	GO:0008270//zinc ion binding;GO:0003700//sequence-specific DNA binding transcription factor activity	GO:0005634//nucleus
CL1005.Contig5_All	1428	0	0	0	0	0	0	gi|301133538|gb|ADK63391.1|	622.9	0	B-box type zinc finger protein [Brassica rapa]	gi|301133537|gb|HM579865.1|	1352	0	Brassica rapa B-box type zinc finger protein (Bbox1) mRNA, complete cds	sp|Q9FHH8|COL5_ARATH	560	0	Zinc finger protein CONSTANS-LIKE 5 OS=Arabidopsis thaliana GN=COL5 PE=2 SV=2	--	--	--	--	--	K12135	6e-69	225	aly:ARALYDRAFT_488429	zinc finger protein CONSTANS	GO:0006355//regulation of transcription, DNA-dependent;GO:0042631//cellular response to water deprivation	GO:0008270//zinc ion binding;GO:0003700//sequence-specific DNA binding transcription factor activity	GO:0005634//nucleus
CL1005.Contig6_All	1375	0	0	0	0	0	0	gi|301133538|gb|ADK63391.1|	620.9	0	B-box type zinc finger protein [Brassica rapa]	gi|301133537|gb|HM579865.1|	1336	0	Brassica rapa B-box type zinc finger protein (Bbox1) mRNA, complete cds	sp|Q9FHH8|COL5_ARATH	566	0	Zinc finger protein CONSTANS-LIKE 5 OS=Arabidopsis thaliana GN=COL5 PE=2 SV=2	--	--	--	--	--	K12135	6e-67	219	aly:ARALYDRAFT_488429	zinc finger protein CONSTANS	GO:0006355//regulation of transcription, DNA-dependent;GO:0042631//cellular response to water deprivation	GO:0008270//zinc ion binding;GO:0003700//sequence-specific DNA binding transcription factor activity	GO:0005634//nucleus
CL1005.Contig7_All	1155	665	19.2338	3407	93.5208	3951	117.134	gi|3341723|gb|AAC35496.1|	556.2	0	CONSTANS-like 1 protein [Raphanus sativus]	gi|3341722|gb|AF052690.1|AF052690	1291	0	Raphanus sativus CONSTANS-like 1 protein (COL1) mRNA, complete cds	sp|Q9SK53|COL3_ARATH	442	9e-157	Zinc finger protein CONSTANS-LIKE 3 OS=Arabidopsis thaliana GN=COL3 PE=1 SV=1	--	--	--	--	--	K12135	1e-75	239	aly:ARALYDRAFT_488429	zinc finger protein CONSTANS	GO:0010155//regulation of proton transport;GO:0031348//negative regulation of defense response;GO:0045893//positive regulation of transcription, DNA-dependent;GO:0010218//response to far red light;GO:0009867//jasmonic acid mediated signaling pathway;GO:0035304//regulation of protein dephosphorylation;GO:0009862//systemic acquired resistance, salicylic acid mediated signaling pathway;GO:0010363//r…	GO:0005515//protein binding;GO:0008270//zinc ion binding;GO:0003700//sequence-specific DNA binding transcription factor activity	GO:0005634//nucleus
CL1006.Contig1_All	2181	389	5.9582	533	7.748	133	2.0881	gi|567124473|ref|XP_006391189.1|	1085.5	0	hypothetical protein EUTSA_v10018271mg [Eutrema salsugineum] >gi|557087623|gb|ESQ28475.1| hypothetical protein EUTSA_v10018271mg [Eutrema salsugineum]	gi|297838554|ref|XM_002887113.1|	2099	0	Arabidopsis lyrata subsp. lyrata atmap70-1, mRNA	sp|Q9C9X0|MP701_ARATH	1051	0	Microtubule-associated protein 70-1 OS=Arabidopsis thaliana GN=MAP70.1 PE=1 SV=1	TVN0807	59.7	2e-08	COG1196	Chromosome segregation ATPases	K06669	7e-09	60.8	bdi:100829877	structural maintenance of chromosome 3 (chondroitin sulfate proteoglycan 6)	GO:0010075//regulation of meristem growth;GO:0007010//cytoskeleton organization;GO:0010051//xylem and phloem pattern formation;GO:0009832//plant-type cell wall biogenesis	GO:0008017//microtubule binding	GO:0010005//cortical microtubule, transverse to long axis;GO:0005634//nucleus;GO:0005886//plasma membrane
CL1006.Contig2_All	2134	53	0.8297	152	2.2582	19	0.3049	gi|567124473|ref|XP_006391189.1|	1088.2	0	hypothetical protein EUTSA_v10018271mg [Eutrema salsugineum] >gi|557087623|gb|ESQ28475.1| hypothetical protein EUTSA_v10018271mg [Eutrema salsugineum]	gi|145337276|ref|NM_105476.4|	2028	0	Arabidopsis thaliana microtubule-associated protein 70-1 mRNA, complete cds	sp|Q8L7S4|MP702_ARATH	1053	0	Microtubule-associated protein 70-2 OS=Arabidopsis thaliana GN=MAP70.2 PE=1 SV=1	PAB0812	62.8	2e-09	COG0419	ATPase involved in DNA repair	K06669	7e-09	60.8	bdi:100829877	structural maintenance of chromosome 3 (chondroitin sulfate proteoglycan 6)	GO:0010075//regulation of meristem growth;GO:0007010//cytoskeleton organization;GO:0010051//xylem and phloem pattern formation;GO:0009832//plant-type cell wall biogenesis	GO:0008017//microtubule binding	GO:0010005//cortical microtubule, transverse to long axis;GO:0005634//nucleus;GO:0005886//plasma membrane
CL1006.Contig3_All	2373	412	5.7999	490	6.5466	951	13.7228	gi|567143319|ref|XP_006395855.1|	1070.5	0	hypothetical protein EUTSA_v10003816mg [Eutrema salsugineum] >gi|557092494|gb|ESQ33141.1| hypothetical protein EUTSA_v10003816mg [Eutrema salsugineum]	gi|297814417|ref|XM_002875046.1|	2046	0	Arabidopsis lyrata subsp. lyrata atmap70-3, mRNA	sp|Q9ZUA3|MP703_ARATH	1046	0	Microtubule-associated protein 70-3 OS=Arabidopsis thaliana GN=MAP70.3 PE=2 SV=1	PAB0812	63.2	2e-09	COG0419	ATPase involved in DNA repair	K10400	3e-08	59.3	osa:4352674	kinesin family member 15	GO:0006346//methylation-dependent chromatin silencing;GO:0031048//chromatin silencing by small RNA;GO:0006312//mitotic recombination;GO:0007131//reciprocal meiotic recombination;GO:0051567//histone H3-K9 methylation;GO:0045010//actin nucleation;GO:0045132//meiotic chromosome segregation;GO:0010075//regulation of meristem growth;GO:0042138//meiotic DNA double-strand break formation;GO:0051225//spi…	GO:0008017//microtubule binding	GO:0005886//plasma membrane;GO:0005634//nucleus;GO:0010005//cortical microtubule, transverse to long axis
CL1006.Contig4_All	826	116	4.6914	190	7.2928	21	0.8706	gi|567147555|ref|XP_006415832.1|	493.4	9e-172	hypothetical protein EUTSA_v10007068mg [Eutrema salsugineum] >gi|557093603|gb|ESQ34185.1| hypothetical protein EUTSA_v10007068mg [Eutrema salsugineum]	gi|297845631|ref|XM_002890651.1|	973	0	Arabidopsis lyrata subsp. lyrata At1g68060/T23K23_9, mRNA	sp|Q8L7S4|MP702_ARATH	478	2e-167	Microtubule-associated protein 70-2 OS=Arabidopsis thaliana GN=MAP70.2 PE=1 SV=1	--	--	--	--	--	--	--	--	--	--	GO:0010075//regulation of meristem growth;GO:0007010//cytoskeleton organization;GO:0010051//xylem and phloem pattern formation;GO:0009832//plant-type cell wall biogenesis	GO:0008017//microtubule binding	GO:0010005//cortical microtubule, transverse to long axis;GO:0005634//nucleus;GO:0005886//plasma membrane
CL1006.Contig5_All	272	44	5.4039	107	12.4719	30	3.7767	gi|567124473|ref|XP_006391189.1|	158.3	2e-45	hypothetical protein EUTSA_v10018271mg [Eutrema salsugineum] >gi|557087623|gb|ESQ28475.1| hypothetical protein EUTSA_v10018271mg [Eutrema salsugineum]	gi|199580182|gb|AC189489.2|	339	1e-90	Brassica rapa subsp. pekinensis clone KBrB084K02, complete sequence	sp|Q8L7S4|MP702_ARATH	150	2e-44	Microtubule-associated protein 70-2 OS=Arabidopsis thaliana GN=MAP70.2 PE=1 SV=1	--	--	--	--	--	--	--	--	--	--	GO:0006346//methylation-dependent chromatin silencing;GO:0031048//chromatin silencing by small RNA;GO:0006312//mitotic recombination;GO:0007131//reciprocal meiotic recombination;GO:0051567//histone H3-K9 methylation;GO:0045010//actin nucleation;GO:0045132//meiotic chromosome segregation;GO:0010075//regulation of meristem growth;GO:0042138//meiotic DNA double-strand break formation;GO:0051225//spi…	GO:0008017//microtubule binding	GO:0005886//plasma membrane;GO:0005634//nucleus;GO:0010005//cortical microtubule, transverse to long axis
CL1006.Contig6_All	1460	187	4.2787	413	8.9684	75	1.759	gi|567147555|ref|XP_006415832.1|	631.7	0	hypothetical protein EUTSA_v10007068mg [Eutrema salsugineum] >gi|557093603|gb|ESQ34185.1| hypothetical protein EUTSA_v10007068mg [Eutrema salsugineum]	gi|240254160|ref|NM_102311.6|	1185	0	Arabidopsis thaliana microtubule-associated protein 70-2 mRNA, complete cds	sp|Q8L7S4|MP702_ARATH	611	0	Microtubule-associated protein 70-2 OS=Arabidopsis thaliana GN=MAP70.2 PE=1 SV=1	--	--	--	--	--	--	--	--	--	--	GO:0010075//regulation of meristem growth;GO:0007010//cytoskeleton organization;GO:0010051//xylem and phloem pattern formation;GO:0009832//plant-type cell wall biogenesis	GO:0008017//microtubule binding	GO:0010005//cortical microtubule, transverse to long axis;GO:0005634//nucleus;GO:0005886//plasma membrane
CL1006.Contig7_All	2239	503	7.5048	1600	22.656	351	5.368	gi|567147555|ref|XP_006415832.1|	1105.9	0	hypothetical protein EUTSA_v10007068mg [Eutrema salsugineum] >gi|557093603|gb|ESQ34185.1| hypothetical protein EUTSA_v10007068mg [Eutrema salsugineum]	gi|240254160|ref|NM_102311.6|	2198	0	Arabidopsis thaliana microtubule-associated protein 70-2 mRNA, complete cds	sp|Q8L7S4|MP702_ARATH	1077	0	Microtubule-associated protein 70-2 OS=Arabidopsis thaliana GN=MAP70.2 PE=1 SV=1	PAB0812	65.1	4e-10	COG0419	ATPase involved in DNA repair	K06674	3e-10	65.5	olu:OSTLU_19472	structural maintenance of chromosome 2	GO:0010075//regulation of meristem growth;GO:0007010//cytoskeleton organization;GO:0010051//xylem and phloem pattern formation;GO:0009832//plant-type cell wall biogenesis	GO:0008017//microtubule binding	GO:0010005//cortical microtubule, transverse to long axis;GO:0005634//nucleus;GO:0005886//plasma membrane
CL1006.Contig8_All	2263	239	3.5281	694	9.7228	271	4.1006	gi|567151571|ref|XP_006416965.1|	1000	0	hypothetical protein EUTSA_v10007120mg [Eutrema salsugineum] >gi|557094736|gb|ESQ35318.1| hypothetical protein EUTSA_v10007120mg [Eutrema salsugineum]	gi|297849903|ref|XM_002892787.1|	1959	0	Arabidopsis lyrata subsp. lyrata atmap70-4, mRNA	sp|Q9LQU7|MP704_ARATH	983	0	Microtubule-associated protein 70-4 OS=Arabidopsis thaliana GN=MAP70.4 PE=1 SV=1	MK0690	70.5	9e-12	COG0419	ATPase involved in DNA repair	K06669	6e-10	64.3	bdi:100829877	structural maintenance of chromosome 3 (chondroitin sulfate proteoglycan 6)	GO:0006346//methylation-dependent chromatin silencing;GO:0031048//chromatin silencing by small RNA;GO:0006312//mitotic recombination;GO:0007131//reciprocal meiotic recombination;GO:0051567//histone H3-K9 methylation;GO:0045010//actin nucleation;GO:0045132//meiotic chromosome segregation;GO:0010075//regulation of meristem growth;GO:0042138//meiotic DNA double-strand break formation;GO:0051225//spi…	GO:0008017//microtubule binding	GO:0005886//plasma membrane;GO:0005634//nucleus;GO:0010005//cortical microtubule, transverse to long axis
CL1006.Contig9_All	2421	1536	21.1944	2045	26.7804	481	6.8031	gi|567124473|ref|XP_006391189.1|	1110.9	0	hypothetical protein EUTSA_v10018271mg [Eutrema salsugineum] >gi|557087623|gb|ESQ28475.1| hypothetical protein EUTSA_v10018271mg [Eutrema salsugineum]	gi|297838554|ref|XM_002887113.1|	2292	0	Arabidopsis lyrata subsp. lyrata atmap70-1, mRNA	sp|Q9C9X0|MP701_ARATH	1073	0	Microtubule-associated protein 70-1 OS=Arabidopsis thaliana GN=MAP70.1 PE=1 SV=1	PAB0812	64.3	8e-10	COG0419	ATPase involved in DNA repair	K09291	2e-08	59.7	vvi:100251875	nucleoprotein TPR	GO:0010075//regulation of meristem growth;GO:0007010//cytoskeleton organization;GO:0010051//xylem and phloem pattern formation;GO:0009832//plant-type cell wall biogenesis	GO:0008017//microtubule binding	GO:0010005//cortical microtubule, transverse to long axis;GO:0005634//nucleus;GO:0005886//plasma membrane
CL1007.Contig1_All	1149	835	24.2768	1291	35.6225	1889	56.2951	gi|357966944|gb|AET97566.1|	509.6	0	heme oxygenase-1 [Brassica juncea]	gi|156567725|gb|EF535853.1|	1122	0	Brassica napus heme oxygenase-1-like protein mRNA, complete cds	sp|O48782|HMOX1_ARATH	462	9e-165	Heme oxygenase 1, chloroplastic OS=Arabidopsis thaliana GN=HO1 PE=1 SV=2	Cgl2178	49.7	2e-06	COG5398	Heme oxygenase	K00510	1e-163	460	aly:ARALYDRAFT_481532	heme oxygenase [EC:1.14.99.3]	GO:0010019//chloroplast-nucleus signaling pathway;GO:0009585//red, far-red light phototransduction;GO:0009813//flavonoid biosynthetic process;GO:0010075//regulation of meristem growth;GO:0016117//carotenoid biosynthetic process;GO:0071494//cellular response to UV-C;GO:0010024//phytochromobilin biosynthetic process;GO:0006788//heme oxidation	GO:0004392//heme oxygenase (decyclizing) activity;GO:0020037//heme binding	GO:0009507//chloroplast
CL1007.Contig2_All	562	0	0	0	0	0	0	gi|286019466|gb|ADC40726.1|	203.8	3e-64	heme oxygenase 1 [Brassica napus]	gi|359358665|gb|HQ690823.1|	365	4e-98	Brassica rapa subsp. pekinensis heme oxygenase 1 (HO1) mRNA, complete cds	sp|O48782|HMOX1_ARATH	177	1e-55	Heme oxygenase 1, chloroplastic OS=Arabidopsis thaliana GN=HO1 PE=1 SV=2	--	--	--	--	--	K00510	3e-57	182	aly:ARALYDRAFT_481532	heme oxygenase [EC:1.14.99.3]	GO:0010019//chloroplast-nucleus signaling pathway;GO:0009585//red, far-red light phototransduction;GO:0009813//flavonoid biosynthetic process;GO:0010075//regulation of meristem growth;GO:0016117//carotenoid biosynthetic process;GO:0071494//cellular response to UV-C;GO:0010024//phytochromobilin biosynthetic process;GO:0006788//heme oxidation	GO:0004392//heme oxygenase (decyclizing) activity;GO:0020037//heme binding	GO:0009507//chloroplast
CL1007.Contig3_All	959	2	0.0697	0	0	2	0.0714	gi|567205321|ref|XP_006408720.1|	466.5	1e-165	hypothetical protein EUTSA_v10002061mg [Eutrema salsugineum] >gi|557109876|gb|ESQ50173.1| hypothetical protein EUTSA_v10002061mg [Eutrema salsugineum]	gi|359358665|gb|HQ690823.1|	1041	0	Brassica rapa subsp. pekinensis heme oxygenase 1 (HO1) mRNA, complete cds	sp|O48782|HMOX1_ARATH	444	1e-158	Heme oxygenase 1, chloroplastic OS=Arabidopsis thaliana GN=HO1 PE=1 SV=2	Cgl2178	49.7	2e-06	COG5398	Heme oxygenase	K00510	1e-159	447	aly:ARALYDRAFT_481532	heme oxygenase [EC:1.14.99.3]	GO:0010019//chloroplast-nucleus signaling pathway;GO:0009585//red, far-red light phototransduction;GO:0009813//flavonoid biosynthetic process;GO:0010075//regulation of meristem growth;GO:0016117//carotenoid biosynthetic process;GO:0071494//cellular response to UV-C;GO:0010024//phytochromobilin biosynthetic process;GO:0006788//heme oxidation	GO:0004392//heme oxygenase (decyclizing) activity;GO:0020037//heme binding	GO:0009507//chloroplast
CL1008.Contig1_All	2048	18	0.2936	11	0.1703	3	0.0502	gi|567188139|ref|XP_006404010.1|	706.4	0	hypothetical protein EUTSA_v10010353mg [Eutrema salsugineum] >gi|312282861|dbj|BAJ34296.1| unnamed protein product [Thellungiella halophila] >gi|557105129|gb|ESQ45463.1| hypothetical protein EUTSA_v10010353mg [Eutrema salsugineum]	gi|312282860|dbj|AK353210.1|	827	0	Thellungiella halophila mRNA, complete cds, clone: RTFL01-27-D18	sp|Q700D2|JKD_ARATH	326	5e-104	Zinc finger protein JACKDAW OS=Arabidopsis thaliana GN=JKD PE=1 SV=1	--	--	--	--	--	--	--	--	--	--	GO:0031348//negative regulation of defense response;GO:0045893//positive regulation of transcription, DNA-dependent;GO:0009867//jasmonic acid mediated signaling pathway;GO:0035304//regulation of protein dephosphorylation;GO:0009862//systemic acquired resistance, salicylic acid mediated signaling pathway;GO:0010431//seed maturation;GO:0010363//regulation of plant-type hypersensitive response;GO:00…	GO:0005515//protein binding;GO:0008270//zinc ion binding;GO:0003676//nucleic acid binding;GO:0003700//sequence-specific DNA binding transcription factor activity	GO:0005634//nucleus
CL1008.Contig2_All	2075	154	2.4793	131	2.0016	47	0.7756	gi|567188139|ref|XP_006404010.1|	736.9	0	hypothetical protein EUTSA_v10010353mg [Eutrema salsugineum] >gi|312282861|dbj|BAJ34296.1| unnamed protein product [Thellungiella halophila] >gi|557105129|gb|ESQ45463.1| hypothetical protein EUTSA_v10010353mg [Eutrema salsugineum]	gi|312282860|dbj|AK353210.1|	827	0	Thellungiella halophila mRNA, complete cds, clone: RTFL01-27-D18	sp|Q700D2|JKD_ARATH	326	7e-104	Zinc finger protein JACKDAW OS=Arabidopsis thaliana GN=JKD PE=1 SV=1	--	--	--	--	--	--	--	--	--	--	GO:0031348//negative regulation of defense response;GO:0045893//positive regulation of transcription, DNA-dependent;GO:0009867//jasmonic acid mediated signaling pathway;GO:0035304//regulation of protein dephosphorylation;GO:0009862//systemic acquired resistance, salicylic acid mediated signaling pathway;GO:0010431//seed maturation;GO:0010363//regulation of plant-type hypersensitive response;GO:00…	GO:0005515//protein binding;GO:0008270//zinc ion binding;GO:0003676//nucleic acid binding;GO:0003700//sequence-specific DNA binding transcription factor activity	GO:0005634//nucleus
CL1008.Contig3_All	1825	1608	29.4339	1526	26.51	347	6.5107	gi|567136121|ref|XP_006393866.1|	636.7	0	hypothetical protein EUTSA_v10004063mg [Eutrema salsugineum] >gi|312283421|dbj|BAJ34576.1| unnamed protein product [Thellungiella halophila] >gi|557090505|gb|ESQ31152.1| hypothetical protein EUTSA_v10004063mg [Eutrema salsugineum]	gi|312283420|dbj|AK353490.1|	490	1e-135	Thellungiella halophila mRNA, complete cds, clone: RTFL01-46-I13	sp|Q9ZWA6|MGP_ARATH	310	1e-98	Zinc finger protein MAGPIE OS=Arabidopsis thaliana GN=MGP PE=1 SV=1	--	--	--	--	--	--	--	--	--	--	GO:0031348//negative regulation of defense response;GO:0045893//positive regulation of transcription, DNA-dependent;GO:0009867//jasmonic acid mediated signaling pathway;GO:0035304//regulation of protein dephosphorylation;GO:0009862//systemic acquired resistance, salicylic acid mediated signaling pathway;GO:0010431//seed maturation;GO:0010363//regulation of plant-type hypersensitive response;GO:00…	GO:0005515//protein binding;GO:0008270//zinc ion binding;GO:0003676//nucleic acid binding;GO:0003700//sequence-specific DNA binding transcription factor activity	GO:0005634//nucleus
CL1008.Contig4_All	1841	223	4.0465	146	2.5143	38	0.7068	gi|567188139|ref|XP_006404010.1|	702.2	0	hypothetical protein EUTSA_v10010353mg [Eutrema salsugineum] >gi|312282861|dbj|BAJ34296.1| unnamed protein product [Thellungiella halophila] >gi|557105129|gb|ESQ45463.1| hypothetical protein EUTSA_v10010353mg [Eutrema salsugineum]	gi|312282860|dbj|AK353210.1|	702	0	Thellungiella halophila mRNA, complete cds, clone: RTFL01-27-D18	sp|Q700D2|JKD_ARATH	327	4e-105	Zinc finger protein JACKDAW OS=Arabidopsis thaliana GN=JKD PE=1 SV=1	--	--	--	--	--	--	--	--	--	--	GO:0031348//negative regulation of defense response;GO:0045893//positive regulation of transcription, DNA-dependent;GO:0009867//jasmonic acid mediated signaling pathway;GO:0035304//regulation of protein dephosphorylation;GO:0009862//systemic acquired resistance, salicylic acid mediated signaling pathway;GO:0010431//seed maturation;GO:0010363//regulation of plant-type hypersensitive response;GO:00…	GO:0005515//protein binding;GO:0008270//zinc ion binding;GO:0003676//nucleic acid binding;GO:0003700//sequence-specific DNA binding transcription factor activity	GO:0005634//nucleus
CL1008.Contig5_All	941	1	0.0355	0	0	0	0	gi|567188139|ref|XP_006404010.1|	392.9	7e-134	hypothetical protein EUTSA_v10010353mg [Eutrema salsugineum] >gi|312282861|dbj|BAJ34296.1| unnamed protein product [Thellungiella halophila] >gi|557105129|gb|ESQ45463.1| hypothetical protein EUTSA_v10010353mg [Eutrema salsugineum]	gi|312282860|dbj|AK353210.1|	428	1e-117	Thellungiella halophila mRNA, complete cds, clone: RTFL01-27-D18	--	--	--	--	--	--	--	--	--	--	--	--	--	--	GO:0031348//negative regulation of defense response;GO:0045893//positive regulation of transcription, DNA-dependent;GO:0009867//jasmonic acid mediated signaling pathway;GO:0035304//regulation of protein dephosphorylation;GO:0009862//systemic acquired resistance, salicylic acid mediated signaling pathway;GO:0010431//seed maturation;GO:0010363//regulation of plant-type hypersensitive response;GO:00…	GO:0005515//protein binding;GO:0008270//zinc ion binding;GO:0003676//nucleic acid binding;GO:0003700//sequence-specific DNA binding transcription factor activity	GO:0005634//nucleus
CL1009.Contig1_All	1161	339	9.7542	212	5.7892	62	1.8286	gi|567149444|ref|XP_006416367.1|	571.6	0	hypothetical protein EUTSA_v10006674mg [Eutrema salsugineum] >gi|557094138|gb|ESQ34720.1| hypothetical protein EUTSA_v10006674mg [Eutrema salsugineum]	gi|199579930|gb|AC189247.2|	1150	0	Brassica rapa subsp. pekinensis clone KBrB018K09, complete sequence	--	--	--	--	--	--	--	--	--	K03126	4e-06	50.1	vvi:100242486	transcription initiation factor TFIID subunit 12	GO:0060151//peroxisome localization;GO:0051646//mitochondrion localization;GO:0030048//actin filament-based movement;GO:0051645//Golgi localization	GO:0005509//calcium ion binding	GO:0005829//cytosol;GO:0005886//plasma membrane
CL1009.Contig2_All	3305	250	2.5269	164	1.5732	49	0.5077	gi|567149444|ref|XP_006416367.1|	1867.4	0	hypothetical protein EUTSA_v10006674mg [Eutrema salsugineum] >gi|557094138|gb|ESQ34720.1| hypothetical protein EUTSA_v10006674mg [Eutrema salsugineum]	gi|240254130|ref|NM_101928.6|	3418	0	Arabidopsis thaliana calcium-binding EF hand-containing protein mRNA, complete cds	sp|Q9M081|SC24B_ARATH	51.2	4e-06	Protein transport protein Sec24-like At4g32640 OS=Arabidopsis thaliana GN=At4g32640 PE=1 SV=3	--	--	--	--	--	--	--	--	--	--	GO:0060151//peroxisome localization;GO:0051646//mitochondrion localization;GO:0030048//actin filament-based movement;GO:0051645//Golgi localization	GO:0005509//calcium ion binding	GO:0005829//cytosol;GO:0005886//plasma membrane
CL1009.Contig3_All	3224	554	5.7404	402	3.9532	138	1.4657	gi|567149444|ref|XP_006416367.1|	1834.3	0	hypothetical protein EUTSA_v10006674mg [Eutrema salsugineum] >gi|557094138|gb|ESQ34720.1| hypothetical protein EUTSA_v10006674mg [Eutrema salsugineum]	gi|240254130|ref|NM_101928.6|	3114	0	Arabidopsis thaliana calcium-binding EF hand-containing protein mRNA, complete cds	sp|Q9M081|SC24B_ARATH	51.2	4e-06	Protein transport protein Sec24-like At4g32640 OS=Arabidopsis thaliana GN=At4g32640 PE=1 SV=3	--	--	--	--	--	--	--	--	--	--	GO:0060151//peroxisome localization;GO:0051646//mitochondrion localization;GO:0030048//actin filament-based movement;GO:0051645//Golgi localization	GO:0005509//calcium ion binding	GO:0005829//cytosol;GO:0005886//plasma membrane
CL1009.Contig4_All	3259	1327	13.6023	999	9.7185	317	3.3307	gi|567149444|ref|XP_006416367.1|	1824.3	0	hypothetical protein EUTSA_v10006674mg [Eutrema salsugineum] >gi|557094138|gb|ESQ34720.1| hypothetical protein EUTSA_v10006674mg [Eutrema salsugineum]	gi|240254130|ref|NM_101928.6|	3188	0	Arabidopsis thaliana calcium-binding EF hand-containing protein mRNA, complete cds	sp|Q9M081|SC24B_ARATH	51.2	4e-06	Protein transport protein Sec24-like At4g32640 OS=Arabidopsis thaliana GN=At4g32640 PE=1 SV=3	--	--	--	--	--	--	--	--	--	--	GO:0060151//peroxisome localization;GO:0051646//mitochondrion localization;GO:0030048//actin filament-based movement;GO:0051645//Golgi localization	GO:0005509//calcium ion binding	GO:0005829//cytosol;GO:0005886//plasma membrane
CL1009.Contig5_All	694	255	12.2745	167	7.6291	51	2.5163	gi|110743116|dbj|BAE99450.1|	427.2	2e-147	hypothetical protein [Arabidopsis thaliana]	gi|240254130|ref|NM_101928.6|	842	0	Arabidopsis thaliana calcium-binding EF hand-containing protein mRNA, complete cds	--	--	--	--	--	--	--	--	--	--	--	--	--	--	GO:0060151//peroxisome localization;GO:0051646//mitochondrion localization;GO:0030048//actin filament-based movement;GO:0051645//Golgi localization	GO:0005509//calcium ion binding	GO:0005829//cytosol;GO:0005886//plasma membrane
CL1009.Contig6_All	438	75	5.7202	66	4.7774	11	0.86	gi|567149444|ref|XP_006416367.1|	208	2e-61	hypothetical protein EUTSA_v10006674mg [Eutrema salsugineum] >gi|557094138|gb|ESQ34720.1| hypothetical protein EUTSA_v10006674mg [Eutrema salsugineum]	gi|297845051|ref|XM_002890361.1|	438	1e-120	Arabidopsis lyrata subsp. lyrata calcium-binding EF hand family protein, mRNA	--	--	--	--	--	--	--	--	--	--	--	--	--	--	GO:0060151//peroxisome localization;GO:0051646//mitochondrion localization;GO:0030048//actin filament-based movement;GO:0051645//Golgi localization	GO:0005509//calcium ion binding	GO:0005829//cytosol;GO:0005886//plasma membrane
CL101.Contig1_All	2014	374	6.2035	7	0.1102	72	1.2241	gi|567162213|ref|XP_006396684.1|	1095.9	0	hypothetical protein EUTSA_v10028500mg [Eutrema salsugineum] >gi|557097701|gb|ESQ38137.1| hypothetical protein EUTSA_v10028500mg [Eutrema salsugineum]	gi|297809630|ref|XM_002872653.1|	1106	0	Arabidopsis lyrata subsp. lyrata kinase family protein, mRNA	sp|Q9SYS3|CRK40_ARATH	972	0	Cysteine-rich receptor-like protein kinase 40 OS=Arabidopsis thaliana GN=CRK40 PE=2 SV=1	YAR019c	99.4	8e-21	COG0515	Serine/threonine protein kinase	K04733	1e-74	244	smo:SELMODRAFT_230241	interleukin-1 receptor-associated kinase 4 [EC:2.7.11.1]	GO:0006468//protein phosphorylation	GO:0005524//ATP binding;GO:0004674//protein serine/threonine kinase activity	GO:0005576//extracellular region
CL101.Contig2_All	1174	22	0.626	42	1.1342	242	7.0584	gi|297809627|ref|XP_002872697.1|	571.6	0	predicted protein [Arabidopsis lyrata subsp. lyrata] >gi|297318534|gb|EFH48956.1| predicted protein [Arabidopsis lyrata subsp. lyrata]	gi|297809630|ref|XM_002872653.1|	846	0	Arabidopsis lyrata subsp. lyrata kinase family protein, mRNA	sp|Q9SYS3|CRK40_ARATH	566	0	Cysteine-rich receptor-like protein kinase 40 OS=Arabidopsis thaliana GN=CRK40 PE=2 SV=1	YAR019c	103	3e-23	COG0515	Serine/threonine protein kinase	K04733	6e-76	239	smo:SELMODRAFT_230241	interleukin-1 receptor-associated kinase 4 [EC:2.7.11.1]	GO:0031348//negative regulation of defense response;GO:0016036//cellular response to phosphate starvation;GO:0006499//N-terminal protein myristoylation;GO:0019375//galactolipid biosynthetic process;GO:0009867//jasmonic acid mediated signaling pathway;GO:0009697//salicylic acid biosynthetic process;GO:0009862//systemic acquired resistance, salicylic acid mediated signaling pathway;GO:0010363//regu…	GO:0004674//protein serine/threonine kinase activity;GO:0005524//ATP binding	GO:0005576//extracellular region;GO:0005886//plasma membrane
CL101.Contig3_All	1379	2	0.0484	4	0.092	217	5.3883	gi|567162219|ref|XP_006396686.1|	663.3	0	hypothetical protein EUTSA_v10029445mg [Eutrema salsugineum] >gi|557097703|gb|ESQ38139.1| hypothetical protein EUTSA_v10029445mg [Eutrema salsugineum]	gi|145332970|ref|NM_001084882.1|	450	1e-123	Arabidopsis thaliana cysteine-rich receptor-like protein kinase 40 mRNA, complete cds	sp|Q9SYS3|CRK40_ARATH	572	0	Cysteine-rich receptor-like protein kinase 40 OS=Arabidopsis thaliana GN=CRK40 PE=2 SV=1	--	--	--	--	--	K04733	1e-32	127	smo:SELMODRAFT_230241	interleukin-1 receptor-associated kinase 4 [EC:2.7.11.1]	GO:0006468//protein phosphorylation	GO:0005524//ATP binding;GO:0004674//protein serine/threonine kinase activity	GO:0005576//extracellular region
CL1010.Contig1_All	1087	410	12.6002	156	4.55	228	7.1823	gi|567147727|ref|XP_006415881.1|	439.1	8e-155	hypothetical protein EUTSA_v10008674mg [Eutrema salsugineum] >gi|557093652|gb|ESQ34234.1| hypothetical protein EUTSA_v10008674mg [Eutrema salsugineum]	gi|21406831|gb|AY088057.1|	872	0	Arabidopsis thaliana clone 40780 mRNA, complete sequence	sp|Q9C6M1|GDT14_ARATH	427	3e-152	GDT1-like protein 4 OS=Arabidopsis thaliana GN=At1g25520 PE=2 SV=1	alr1698	145	2e-41	COG2119	Predicted membrane protein	--	--	--	--	--	GO:0080167//response to karrikin	-	GO:0016021//integral to membrane;GO:0009507//chloroplast
CL1010.Contig2_All	944	193	6.8298	184	6.1797	272	9.8663	gi|567147727|ref|XP_006415881.1|	421.4	1e-148	hypothetical protein EUTSA_v10008674mg [Eutrema salsugineum] >gi|557093652|gb|ESQ34234.1| hypothetical protein EUTSA_v10008674mg [Eutrema salsugineum]	gi|21406831|gb|AY088057.1|	848	0	Arabidopsis thaliana clone 40780 mRNA, complete sequence	sp|Q9C6M1|GDT14_ARATH	410	5e-146	GDT1-like protein 4 OS=Arabidopsis thaliana GN=At1g25520 PE=2 SV=1	alr1698	145	1e-41	COG2119	Predicted membrane protein	--	--	--	--	--	GO:0080167//response to karrikin	-	GO:0016021//integral to membrane;GO:0009507//chloroplast
CL1010.Contig3_All	1064	69	2.1664	49	1.4601	63	2.0275	gi|567147727|ref|XP_006415881.1|	424.5	3e-149	hypothetical protein EUTSA_v10008674mg [Eutrema salsugineum] >gi|557093652|gb|ESQ34234.1| hypothetical protein EUTSA_v10008674mg [Eutrema salsugineum]	gi|21406831|gb|AY088057.1|	860	0	Arabidopsis thaliana clone 40780 mRNA, complete sequence	sp|Q9C6M1|GDT14_ARATH	413	1e-146	GDT1-like protein 4 OS=Arabidopsis thaliana GN=At1g25520 PE=2 SV=1	alr1698	145	3e-41	COG2119	Predicted membrane protein	--	--	--	--	--	GO:0080167//response to karrikin	-	GO:0016021//integral to membrane;GO:0009507//chloroplast
CL1011.Contig1_All	247	456	61.6726	382	49.0326	140	19.4084	gi|12322717|gb|AAG51341.1|AC012562_2	162.9	1e-46	putative clathrin heavy chain, 3&apos; partial; 6334-1 [Arabidopsis thaliana]	gi|186509901|ref|NM_111688.6|	307	3e-81	Arabidopsis thaliana Clathrin, heavy chain mRNA, complete cds	sp|Q0WLB5|CLAH2_ARATH	162	3e-48	Clathrin heavy chain 2 OS=Arabidopsis thaliana GN=CHC2 PE=1 SV=1	--	--	--	--	--	K04646	7e-48	162	aly:ARALYDRAFT_478454	clathrin heavy chain	GO:0006897//endocytosis;GO:0006886//intracellular protein transport	GO:0005515//protein binding;GO:0005198//structural molecule activity	GO:0005829//cytosol;GO:0030132//clathrin coat of coated pit;GO:0030130//clathrin coat of trans-Golgi network vesicle;GO:0009506//plasmodesma;GO:0005774//vacuolar membrane;GO:0009507//chloroplast
CL1011.Contig2_All	5593	439	2.6221	371	2.103	112	0.6857	gi|567200600|ref|XP_006407470.1|	3339.3	0	hypothetical protein EUTSA_v10019884mg [Eutrema salsugineum] >gi|557108616|gb|ESQ48923.1| hypothetical protein EUTSA_v10019884mg [Eutrema salsugineum]	gi|30681616|ref|NM_111950.2|	7646	0	Arabidopsis thaliana Clathrin, heavy chain mRNA, complete cds	sp|Q0WNJ6|CLAH1_ARATH	3331	0	Clathrin heavy chain 1 OS=Arabidopsis thaliana GN=CHC1 PE=1 SV=1	--	--	--	--	--	K04646	0	3337	aly:ARALYDRAFT_478454	clathrin heavy chain	GO:0006897//endocytosis;GO:0006886//intracellular protein transport	GO:0005515//protein binding;GO:0005198//structural molecule activity	GO:0005829//cytosol;GO:0030132//clathrin coat of coated pit;GO:0030130//clathrin coat of trans-Golgi network vesicle;GO:0009506//plasmodesma;GO:0005774//vacuolar membrane;GO:0009507//chloroplast
CL1011.Contig3_All	5676	2217	13.0481	1911	10.6742	767	4.6271	gi|567200600|ref|XP_006407470.1|	3339.3	0	hypothetical protein EUTSA_v10019884mg [Eutrema salsugineum] >gi|557108616|gb|ESQ48923.1| hypothetical protein EUTSA_v10019884mg [Eutrema salsugineum]	gi|30681616|ref|NM_111950.2|	7652	0	Arabidopsis thaliana Clathrin, heavy chain mRNA, complete cds	sp|Q0WNJ6|CLAH1_ARATH	3331	0	Clathrin heavy chain 1 OS=Arabidopsis thaliana GN=CHC1 PE=1 SV=1	--	--	--	--	--	K04646	0	3337	aly:ARALYDRAFT_478454	clathrin heavy chain	GO:0006897//endocytosis;GO:0006886//intracellular protein transport	GO:0005515//protein binding;GO:0005198//structural molecule activity	GO:0005829//cytosol;GO:0030132//clathrin coat of coated pit;GO:0030130//clathrin coat of trans-Golgi network vesicle;GO:0009506//plasmodesma;GO:0005774//vacuolar membrane;GO:0009507//chloroplast
CL1011.Contig4_All	5577	1674	10.0272	1241	7.0549	576	3.5366	gi|567200600|ref|XP_006407470.1|	3338.1	0	hypothetical protein EUTSA_v10019884mg [Eutrema salsugineum] >gi|557108616|gb|ESQ48923.1| hypothetical protein EUTSA_v10019884mg [Eutrema salsugineum]	gi|30681616|ref|NM_111950.2|	7654	0	Arabidopsis thaliana Clathrin, heavy chain mRNA, complete cds	sp|Q0WNJ6|CLAH1_ARATH	3330	0	Clathrin heavy chain 1 OS=Arabidopsis thaliana GN=CHC1 PE=1 SV=1	--	--	--	--	--	K04646	0	3336	aly:ARALYDRAFT_478454	clathrin heavy chain	GO:0006897//endocytosis;GO:0006886//intracellular protein transport	GO:0005515//protein binding;GO:0005198//structural molecule activity	GO:0005829//cytosol;GO:0030132//clathrin coat of coated pit;GO:0030130//clathrin coat of trans-Golgi network vesicle;GO:0009506//plasmodesma;GO:0005774//vacuolar membrane;GO:0009507//chloroplast
CL1012.Contig1_All	1814	188	3.4621	565	9.8748	312	5.8895	gi|36957267|gb|AAQ87025.1|	851.3	0	pectate lyase-like protein [Brassica napus]	gi|36957266|gb|AY377855.1|	1350	0	Brassica napus pectate lyase-like protein (BPL1) mRNA, complete cds	sp|Q93Z04|PLY13_ARATH	816	0	Probable pectate lyase 13 OS=Arabidopsis thaliana GN=PMR6 PE=1 SV=1	TM0433	89.4	1e-18	COG3866	Pectate lyase	K01728	0	816	aly:ARALYDRAFT_485907	pectate lyase [EC:4.2.2.2]	GO:0042547//cell wall modification involved in multidimensional cell growth;GO:0048767//root hair elongation;GO:0000271//polysaccharide biosynthetic process;GO:0009932//cell tip growth;GO:0043481//anthocyanin accumulation in tissues in response to UV light;GO:0010817//regulation of hormone levels;GO:0009814//defense response, incompatible interaction	GO:0030570//pectate lyase activity	GO:0046658//anchored to plasma membrane
CL1012.Contig2_All	1701	391	7.6789	1396	26.0195	131	2.6371	gi|36957267|gb|AAQ87025.1|	916.4	0	pectate lyase-like protein [Brassica napus]	gi|36957266|gb|AY377855.1|	1816	0	Brassica napus pectate lyase-like protein (BPL1) mRNA, complete cds	sp|Q93Z04|PLY13_ARATH	837	0	Probable pectate lyase 13 OS=Arabidopsis thaliana GN=PMR6 PE=1 SV=1	TM0433	92.8	9e-20	COG3866	Pectate lyase	K01728	0	837	ath:AT3G54920	pectate lyase [EC:4.2.2.2]	GO:0042547//cell wall modification involved in multidimensional cell growth;GO:0048767//root hair elongation;GO:0000271//polysaccharide biosynthetic process;GO:0009932//cell tip growth;GO:0043481//anthocyanin accumulation in tissues in response to UV light;GO:0010817//regulation of hormone levels;GO:0009814//defense response, incompatible interaction	GO:0030570//pectate lyase activity	GO:0046658//anchored to plasma membrane
CL1012.Contig3_All	1613	598	12.3849	1179	23.1738	613	13.0132	gi|36957267|gb|AAQ87025.1|	850.5	0	pectate lyase-like protein [Brassica napus]	gi|36957266|gb|AY377855.1|	1402	0	Brassica napus pectate lyase-like protein (BPL1) mRNA, complete cds	sp|Q93Z04|PLY13_ARATH	785	0	Probable pectate lyase 13 OS=Arabidopsis thaliana GN=PMR6 PE=1 SV=1	TM0433	85.9	2e-17	COG3866	Pectate lyase	K01728	0	785	ath:AT3G54920	pectate lyase [EC:4.2.2.2]	GO:0042547//cell wall modification involved in multidimensional cell growth;GO:0048767//root hair elongation;GO:0000271//polysaccharide biosynthetic process;GO:0009932//cell tip growth;GO:0043481//anthocyanin accumulation in tissues in response to UV light;GO:0010817//regulation of hormone levels;GO:0009814//defense response, incompatible interaction	GO:0030570//pectate lyase activity	GO:0046658//anchored to plasma membrane
CL1012.Contig4_All	1513	0	0	0	0	0	0	gi|36957267|gb|AAQ87025.1|	845.1	0	pectate lyase-like protein [Brassica napus]	gi|36957266|gb|AY377855.1|	1641	0	Brassica napus pectate lyase-like protein (BPL1) mRNA, complete cds	sp|Q93Z04|PLY13_ARATH	754	0	Probable pectate lyase 13 OS=Arabidopsis thaliana GN=PMR6 PE=1 SV=1	TM0433	92.8	7e-20	COG3866	Pectate lyase	K01728	0	754	ath:AT3G54920	pectate lyase [EC:4.2.2.2]	GO:0042547//cell wall modification involved in multidimensional cell growth;GO:0048767//root hair elongation;GO:0000271//polysaccharide biosynthetic process;GO:0009932//cell tip growth;GO:0043481//anthocyanin accumulation in tissues in response to UV light;GO:0010817//regulation of hormone levels;GO:0009814//defense response, incompatible interaction	GO:0030570//pectate lyase activity	GO:0046658//anchored to plasma membrane
CL1012.Contig5_All	1743	16	0.3067	14	0.2547	0	0	gi|36957267|gb|AAQ87025.1|	850.9	0	pectate lyase-like protein [Brassica napus]	gi|36957266|gb|AY377855.1|	1641	0	Brassica napus pectate lyase-like protein (BPL1) mRNA, complete cds	sp|Q93Z04|PLY13_ARATH	791	0	Probable pectate lyase 13 OS=Arabidopsis thaliana GN=PMR6 PE=1 SV=1	TM0433	92.8	9e-20	COG3866	Pectate lyase	K01728	0	791	ath:AT3G54920	pectate lyase [EC:4.2.2.2]	GO:0042547//cell wall modification involved in multidimensional cell growth;GO:0048767//root hair elongation;GO:0000271//polysaccharide biosynthetic process;GO:0009932//cell tip growth;GO:0043481//anthocyanin accumulation in tissues in response to UV light;GO:0010817//regulation of hormone levels;GO:0009814//defense response, incompatible interaction	GO:0030570//pectate lyase activity	GO:0046658//anchored to plasma membrane
CL1012.Contig6_All	347	40	3.8508	10	0.9137	2	0.1974	gi|297810519|ref|XP_002873143.1|	152.9	2e-43	pectate lyase family protein [Arabidopsis lyrata subsp. lyrata] >gi|297318980|gb|EFH49402.1| pectate lyase family protein [Arabidopsis lyrata subsp. lyrata]	gi|297810518|ref|XM_002873097.1|	198	3e-48	Arabidopsis lyrata subsp. lyrata pectate lyase family protein, mRNA	sp|Q93Z04|PLY13_ARATH	45.8	1e-06	Probable pectate lyase 13 OS=Arabidopsis thaliana GN=PMR6 PE=1 SV=1	--	--	--	--	--	K01728	9e-45	152	aly:ARALYDRAFT_487211	pectate lyase [EC:4.2.2.2]	GO:0008152//metabolic process	GO:0030570//pectate lyase activity	GO:0005886//plasma membrane;GO:0031225//anchored to membrane
CL1013.Contig1_All	1373	32	0.7786	65	1.5009	183	4.5639	gi|567218584|ref|XP_006412921.1|	709.1	0	hypothetical protein EUTSA_v10025355mg [Eutrema salsugineum] >gi|557114091|gb|ESQ54374.1| hypothetical protein EUTSA_v10025355mg [Eutrema salsugineum]	gi|145362565|ref|NM_202903.2|	1082	0	Arabidopsis thaliana pfkB-like carbohydrate kinase family protein mRNA, complete cds	sp|Q6XZ79|SCRK1_MAIZE	52	3e-07	Fructokinase-1 OS=Zea mays GN=FRK1 PE=1 SV=1	BS_rbsK	71.6	3e-13	COG0524	Sugar kinases, ribokinase family	K00852	1e-11	67.4	pop:POPTR_1094210	ribokinase [EC:2.7.1.15]	GO:0006014//D-ribose metabolic process;GO:0046835//carbohydrate phosphorylation	GO:0004747//ribokinase activity	GO:0009507//chloroplast
CL1013.Contig2_All	1403	15	0.3572	22	0.4971	17	0.4149	gi|567218584|ref|XP_006412921.1|	661.4	0	hypothetical protein EUTSA_v10025355mg [Eutrema salsugineum] >gi|557114091|gb|ESQ54374.1| hypothetical protein EUTSA_v10025355mg [Eutrema salsugineum]	gi|297803193|ref|XM_002869435.1|	1066	0	Arabidopsis lyrata subsp. lyrata pfkB-type carbohydrate kinase family protein, mRNA	sp|Q6XZ79|SCRK1_MAIZE	52	3e-07	Fructokinase-1 OS=Zea mays GN=FRK1 PE=1 SV=1	BS_rbsK	71.6	3e-13	COG0524	Sugar kinases, ribokinase family	K00852	4e-11	65.9	pop:POPTR_1094210	ribokinase [EC:2.7.1.15]	GO:0006014//D-ribose metabolic process;GO:0046835//carbohydrate phosphorylation	GO:0004747//ribokinase activity	GO:0009507//chloroplast
CL1014.Contig1_All	1832	7	0.1276	39	0.6749	89	1.6635	gi|567217496|ref|XP_006412377.1|	914.1	0	hypothetical protein EUTSA_v10024900mg [Eutrema salsugineum] >gi|557113547|gb|ESQ53830.1| hypothetical protein EUTSA_v10024900mg [Eutrema salsugineum]	gi|240256135|ref|NM_119476.6|	841	0	Arabidopsis thaliana pectinesterase 44 mRNA, complete cds	sp|Q9SMY7|PME44_ARATH	890	0	Probable pectinesterase/pectinesterase inhibitor 44 OS=Arabidopsis thaliana GN=PME44 PE=2 SV=2	CAC3373	145	3e-38	COG4677	Pectin methylesterase	K01051	0	890	ath:AT4G33220	pectinesterase [EC:3.1.1.11]	GO:0042545//cell wall modification;GO:0043086//negative regulation of catalytic activity;GO:0045490//pectin catabolic process	GO:0030599//pectinesterase activity;GO:0045330;GO:0004857//enzyme inhibitor activity	GO:0009505//plant-type cell wall;GO:0005576//extracellular region
CL1014.Contig2_All	1888	0	0	12	0.2015	50	0.9068	gi|567217496|ref|XP_006412377.1|	961.8	0	hypothetical protein EUTSA_v10024900mg [Eutrema salsugineum] >gi|557113547|gb|ESQ53830.1| hypothetical protein EUTSA_v10024900mg [Eutrema salsugineum]	gi|240256135|ref|NM_119476.6|	1499	0	Arabidopsis thaliana pectinesterase 44 mRNA, complete cds	sp|Q9SMY7|PME44_ARATH	938	0	Probable pectinesterase/pectinesterase inhibitor 44 OS=Arabidopsis thaliana GN=PME44 PE=2 SV=2	CAC3373	157	2e-42	COG4677	Pectin methylesterase	K01051	0	938	ath:AT4G33220	pectinesterase [EC:3.1.1.11]	GO:0042545//cell wall modification;GO:0043086//negative regulation of catalytic activity;GO:0045490//pectin catabolic process	GO:0030599//pectinesterase activity;GO:0045330;GO:0004857//enzyme inhibitor activity	GO:0009505//plant-type cell wall;GO:0005576//extracellular region
CL1014.Contig3_All	1897	2	0.0352	36	0.6017	114	2.0578	gi|567217496|ref|XP_006412377.1|	961.8	0	hypothetical protein EUTSA_v10024900mg [Eutrema salsugineum] >gi|557113547|gb|ESQ53830.1| hypothetical protein EUTSA_v10024900mg [Eutrema salsugineum]	gi|240256135|ref|NM_119476.6|	1499	0	Arabidopsis thaliana pectinesterase 44 mRNA, complete cds	sp|Q9SMY7|PME44_ARATH	938	0	Probable pectinesterase/pectinesterase inhibitor 44 OS=Arabidopsis thaliana GN=PME44 PE=2 SV=2	CAC3373	157	2e-42	COG4677	Pectin methylesterase	K01051	0	938	ath:AT4G33220	pectinesterase [EC:3.1.1.11]	GO:0042545//cell wall modification;GO:0043086//negative regulation of catalytic activity;GO:0045490//pectin catabolic process	GO:0030599//pectinesterase activity;GO:0045330;GO:0004857//enzyme inhibitor activity	GO:0009505//plant-type cell wall;GO:0005576//extracellular region
CL1014.Contig4_All	1236	6	0.1622	56	1.4364	5	0.1385	gi|119935939|gb|ABM06040.1|	662.5	0	At4g33220 [Arabidopsis thaliana]	gi|240256135|ref|NM_119476.6|	1136	0	Arabidopsis thaliana pectinesterase 44 mRNA, complete cds	sp|Q9SMY7|PME44_ARATH	662	0	Probable pectinesterase/pectinesterase inhibitor 44 OS=Arabidopsis thaliana GN=PME44 PE=2 SV=2	CAC3373	157	3e-44	COG4677	Pectin methylesterase	K01051	0	665	aly:ARALYDRAFT_656700	pectinesterase [EC:3.1.1.11]	GO:0042545//cell wall modification;GO:0043086//negative regulation of catalytic activity;GO:0045490//pectin catabolic process	GO:0030599//pectinesterase activity;GO:0045330;GO:0004857//enzyme inhibitor activity	GO:0009505//plant-type cell wall;GO:0005576//extracellular region
CL1014.Contig5_All	472	4	0.2831	54	3.6272	3	0.2176	gi|62321360|dbj|BAD94663.1|	243.4	1e-81	pectinesterase like protein [Arabidopsis thaliana]	gi|332656411|gb|CP002687.1|	392	1e-106	Arabidopsis thaliana chromosome 4, complete genome	sp|Q9SMY7|PME44_ARATH	243	4e-79	Probable pectinesterase/pectinesterase inhibitor 44 OS=Arabidopsis thaliana GN=PME44 PE=2 SV=2	CAC3373	72.4	4e-15	COG4677	Pectin methylesterase	K01051	1e-78	243	ath:AT4G33220	pectinesterase [EC:3.1.1.11]	GO:0042545//cell wall modification;GO:0043086//negative regulation of catalytic activity;GO:0045490//pectin catabolic process	GO:0030599//pectinesterase activity;GO:0045330;GO:0004857//enzyme inhibitor activity	GO:0009505//plant-type cell wall;GO:0005576//extracellular region
CL1014.Contig6_All	550	13	0.7896	81	4.6692	7	0.4358	gi|567217496|ref|XP_006412377.1|	300.8	3e-99	hypothetical protein EUTSA_v10024900mg [Eutrema salsugineum] >gi|557113547|gb|ESQ53830.1| hypothetical protein EUTSA_v10024900mg [Eutrema salsugineum]	gi|240256135|ref|NM_119476.6|	375	1e-101	Arabidopsis thaliana pectinesterase 44 mRNA, complete cds	sp|Q9SMY7|PME44_ARATH	273	3e-90	Probable pectinesterase/pectinesterase inhibitor 44 OS=Arabidopsis thaliana GN=PME44 PE=2 SV=2	--	--	--	--	--	K01051	7e-92	278	aly:ARALYDRAFT_656700	pectinesterase [EC:3.1.1.11]	GO:0042545//cell wall modification;GO:0043086//negative regulation of catalytic activity;GO:0045490//pectin catabolic process	GO:0030599//pectinesterase activity;GO:0045330;GO:0004857//enzyme inhibitor activity	GO:0009505//plant-type cell wall;GO:0005576//extracellular region
CL1015.Contig1_All	1403	27	0.6429	15	0.339	7	0.1708	gi|567216164|ref|XP_006411711.1|	588.6	0	hypothetical protein EUTSA_v10025644mg [Eutrema salsugineum] >gi|557112881|gb|ESQ53164.1| hypothetical protein EUTSA_v10025644mg [Eutrema salsugineum]	gi|356494245|gb|JN157615.1|	1562	0	Brassica rapa subsp. chinensis L-galactose-1-phosphate phosphatase (VTC4) mRNA, complete cds	sp|Q6NPM8|IMPL2_ARATH	581	0	Bifunctional phosphatase IMPL2, chloroplastic OS=Arabidopsis thaliana GN=IMPL2 PE=1 SV=1	AGl1926	207	9e-63	COG0483	Archaeal fructose-1,6-bisphosphatase and related enzymes of inositol monophosphatase family	K01092	8e-23	100	ath:AT1G31190	myo-inositol-1(or 4)-monophosphatase [EC:3.1.3.25]	GO:0016311//dephosphorylation;GO:0000105//histidine biosynthetic process;GO:0006790//sulfur compound metabolic process;GO:0046854//phosphatidylinositol phosphorylation	GO:0004401//histidinol-phosphatase activity;GO:0010347//L-galactose-1-phosphate phosphatase activity;GO:0052833//inositol monophosphate 4-phosphatase activity;GO:0008441//3'(2'),5'-bisphosphate nucleotidase activity;GO:0052832//inositol monophosphate 3-phosphatase activity;GO:0008934//inositol monophosphate 1-phosphatase activity	GO:0009507//chloroplast
CL1015.Contig2_All	1593	4	0.0839	0	0	6	0.129	gi|567216164|ref|XP_006411711.1|	257.3	1e-159	hypothetical protein EUTSA_v10025644mg [Eutrema salsugineum] >gi|557112881|gb|ESQ53164.1| hypothetical protein EUTSA_v10025644mg [Eutrema salsugineum]	gi|334187305|ref|NM_120072.4|	967	0	Arabidopsis thaliana myo-inositol monophosphatase like 2 mRNA, complete cds	sp|Q6NPM8|IMPL2_ARATH	325	8e-155	Bifunctional phosphatase IMPL2, chloroplastic OS=Arabidopsis thaliana GN=IMPL2 PE=1 SV=1	AGl1926	151	4e-41	COG0483	Archaeal fructose-1,6-bisphosphatase and related enzymes of inositol monophosphatase family	K01092	1e-15	66.6	sbi:SORBI_04g004700	myo-inositol-1(or 4)-monophosphatase [EC:3.1.3.25]	GO:0016311//dephosphorylation;GO:0000105//histidine biosynthetic process;GO:0006790//sulfur compound metabolic process;GO:0046854//phosphatidylinositol phosphorylation	GO:0004401//histidinol-phosphatase activity;GO:0010347//L-galactose-1-phosphate phosphatase activity;GO:0008441//3'(2'),5'-bisphosphate nucleotidase activity;GO:0008934//inositol monophosphate 1-phosphatase activity	GO:0009507//chloroplast
CL1015.Contig3_All	1503	12	0.2667	14	0.2953	8	0.1823	gi|567216164|ref|XP_006411711.1|	578.6	0	hypothetical protein EUTSA_v10025644mg [Eutrema salsugineum] >gi|557112881|gb|ESQ53164.1| hypothetical protein EUTSA_v10025644mg [Eutrema salsugineum]	gi|334187305|ref|NM_120072.4|	1366	0	Arabidopsis thaliana myo-inositol monophosphatase like 2 mRNA, complete cds	sp|Q6NPM8|IMPL2_ARATH	556	0	Bifunctional phosphatase IMPL2, chloroplastic OS=Arabidopsis thaliana GN=IMPL2 PE=1 SV=1	AGl1926	208	5e-63	COG0483	Archaeal fructose-1,6-bisphosphatase and related enzymes of inositol monophosphatase family	K10047	2e-20	92.4	aly:ARALYDRAFT_477531	inositol-phosphate phosphatase / L-galactose 1-phosphate phosphatase [EC:3.1.3.25 3.1.3.-]	GO:0016311//dephosphorylation;GO:0000105//histidine biosynthetic process;GO:0006790//sulfur compound metabolic process;GO:0046854//phosphatidylinositol phosphorylation	GO:0004401//histidinol-phosphatase activity;GO:0010347//L-galactose-1-phosphate phosphatase activity;GO:0008441//3'(2'),5'-bisphosphate nucleotidase activity;GO:0008934//inositol monophosphate 1-phosphatase activity	GO:0009507//chloroplast
CL1015.Contig4_All	1492	0	0	0	0	2	0.0459	gi|567216164|ref|XP_006411711.1|	267.3	1e-162	hypothetical protein EUTSA_v10025644mg [Eutrema salsugineum] >gi|557112881|gb|ESQ53164.1| hypothetical protein EUTSA_v10025644mg [Eutrema salsugineum]	gi|356494245|gb|JN157615.1|	1007	0	Brassica rapa subsp. chinensis L-galactose-1-phosphate phosphatase (VTC4) mRNA, complete cds	sp|Q6NPM8|IMPL2_ARATH	325	3e-162	Bifunctional phosphatase IMPL2, chloroplastic OS=Arabidopsis thaliana GN=IMPL2 PE=1 SV=1	AGl1926	151	2e-41	COG0483	Archaeal fructose-1,6-bisphosphatase and related enzymes of inositol monophosphatase family	K01092	1e-17	70.9	ath:AT1G31190	myo-inositol-1(or 4)-monophosphatase [EC:3.1.3.25]	GO:0016311//dephosphorylation;GO:0000105//histidine biosynthetic process;GO:0006790//sulfur compound metabolic process;GO:0046854//phosphatidylinositol phosphorylation	GO:0004401//histidinol-phosphatase activity;GO:0010347//L-galactose-1-phosphate phosphatase activity;GO:0052833//inositol monophosphate 4-phosphatase activity;GO:0008441//3'(2'),5'-bisphosphate nucleotidase activity;GO:0052832//inositol monophosphate 3-phosphatase activity;GO:0008934//inositol monophosphate 1-phosphatase activity	GO:0009507//chloroplast
CL1015.Contig5_All	1440	28	0.6496	22	0.4844	11	0.2616	gi|567216164|ref|XP_006411711.1|	578.6	0	hypothetical protein EUTSA_v10025644mg [Eutrema salsugineum] >gi|557112881|gb|ESQ53164.1| hypothetical protein EUTSA_v10025644mg [Eutrema salsugineum]	gi|356494245|gb|JN157615.1|	1291	0	Brassica rapa subsp. chinensis L-galactose-1-phosphate phosphatase (VTC4) mRNA, complete cds	sp|Q6NPM8|IMPL2_ARATH	556	0	Bifunctional phosphatase IMPL2, chloroplastic OS=Arabidopsis thaliana GN=IMPL2 PE=1 SV=1	AGl1926	208	3e-63	COG0483	Archaeal fructose-1,6-bisphosphatase and related enzymes of inositol monophosphatase family	K10047	2e-20	92.4	aly:ARALYDRAFT_477531	inositol-phosphate phosphatase / L-galactose 1-phosphate phosphatase [EC:3.1.3.25 3.1.3.-]	GO:0016311//dephosphorylation;GO:0000105//histidine biosynthetic process;GO:0006790//sulfur compound metabolic process;GO:0046854//phosphatidylinositol phosphorylation	GO:0004401//histidinol-phosphatase activity;GO:0010347//L-galactose-1-phosphate phosphatase activity;GO:0008441//3'(2'),5'-bisphosphate nucleotidase activity;GO:0008934//inositol monophosphate 1-phosphatase activity	GO:0009507//chloroplast
CL1015.Contig6_All	2806	121	1.4405	164	1.853	561	6.8459	gi|567184164|ref|XP_006402900.1|	939.9	0	hypothetical protein EUTSA_v10005825mg [Eutrema salsugineum] >gi|557103999|gb|ESQ44353.1| hypothetical protein EUTSA_v10005825mg [Eutrema salsugineum]	gi|47679069|gb|BT014738.1|	1590	0	Arabidopsis thaliana At3g57180.1 mRNA sequence	sp|Q6NPM8|IMPL2_ARATH	325	2e-154	Bifunctional phosphatase IMPL2, chloroplastic OS=Arabidopsis thaliana GN=IMPL2 PE=1 SV=1	lin1526	155	2e-40	COG1161	Predicted GTPases	K13427	1e-27	118	ppp:PHYPADRAFT_21462	nitric-oxide synthase, plant [EC:1.14.13.39]	GO:0016556//mRNA modification;GO:0009742//brassinosteroid mediated signaling pathway;GO:0032502//developmental process	GO:0005525//GTP binding	GO:0009507//chloroplast;GO:0005634//nucleus
CL1016.Contig1_All	2528	107	1.4139	1536	19.2634	2249	30.4629	gi|567125463|ref|XP_006391459.1|	1183.7	0	hypothetical protein EUTSA_v10018170mg [Eutrema salsugineum] >gi|557087893|gb|ESQ28745.1| hypothetical protein EUTSA_v10018170mg [Eutrema salsugineum]	gi|186513878|ref|NM_118803.4|	1360	0	Arabidopsis thaliana glycerophosphoryl diester phosphodiesterase-like 3 mRNA, complete cds	sp|Q7Y208|GLPQ3_ARATH	1129	0	Probable glycerophosphoryl diester phosphodiesterase 3 OS=Arabidopsis thaliana GN=GPDL3 PE=1 SV=2	all1051	105	2e-23	COG0584	Glycerophosphoryl diester phosphodiesterase	K01126	7e-24	105	bdi:100836423	glycerophosphoryl diester phosphodiesterase [EC:3.1.4.46]	GO:0006071//glycerol metabolic process;GO:0030643//cellular phosphate ion homeostasis;GO:0016126//sterol biosynthetic process;GO:0007155//cell adhesion;GO:0019252//starch biosynthetic process;GO:0045010//actin nucleation;GO:0010075//regulation of meristem growth;GO:0052546//cell wall pectin metabolic process;GO:0000023//maltose metabolic process;GO:0048767//root hair elongation;GO:0016556//mRNA m…	GO:0008889//glycerophosphodiester phosphodiesterase activity;GO:0004674//protein serine/threonine kinase activity;GO:0005524//ATP binding	GO:0046658//anchored to plasma membrane;GO:0048046//apoplast;GO:0009505//plant-type cell wall;GO:0009507//chloroplast;GO:0009506//plasmodesma
CL1016.Contig2_All	2619	790	10.0767	861	10.4228	207	2.7064	gi|567219044|ref|XP_006413151.1|	1227.6	0	hypothetical protein EUTSA_v10024494mg [Eutrema salsugineum] >gi|557114321|gb|ESQ54604.1| hypothetical protein EUTSA_v10024494mg [Eutrema salsugineum]	gi|186513878|ref|NM_118803.4|	1386	0	Arabidopsis thaliana glycerophosphoryl diester phosphodiesterase-like 3 mRNA, complete cds	sp|Q9SZ11|GLPQ2_ARATH	1196	0	Probable glycerophosphoryl diester phosphodiesterase 2 OS=Arabidopsis thaliana GN=GPDL2 PE=1 SV=3	all1051	90.1	2e-18	COG0584	Glycerophosphoryl diester phosphodiesterase	K01126	2e-23	104	gmx:100800181	glycerophosphoryl diester phosphodiesterase [EC:3.1.4.46]	GO:0006071//glycerol metabolic process;GO:0030643//cellular phosphate ion homeostasis;GO:0016126//sterol biosynthetic process;GO:0007155//cell adhesion;GO:0019252//starch biosynthetic process;GO:0045010//actin nucleation;GO:0010075//regulation of meristem growth;GO:0052546//cell wall pectin metabolic process;GO:0000023//maltose metabolic process;GO:0048767//root hair elongation;GO:0016556//mRNA m…	GO:0008889//glycerophosphodiester phosphodiesterase activity;GO:0004674//protein serine/threonine kinase activity;GO:0005524//ATP binding	GO:0046658//anchored to plasma membrane;GO:0048046//apoplast;GO:0009505//plant-type cell wall;GO:0009507//chloroplast;GO:0009506//plasmodesma
CL1016.Contig3_All	2622	1296	16.5119	1273	15.3927	289	3.7742	gi|567219044|ref|XP_006413151.1|	1290	0	hypothetical protein EUTSA_v10024494mg [Eutrema salsugineum] >gi|557114321|gb|ESQ54604.1| hypothetical protein EUTSA_v10024494mg [Eutrema salsugineum]	gi|297799323|ref|XM_002867500.1|	2087	0	Arabidopsis lyrata subsp. lyrata MRH5/SHV3, mRNA	sp|Q9SZ11|GLPQ2_ARATH	1240	0	Probable glycerophosphoryl diester phosphodiesterase 2 OS=Arabidopsis thaliana GN=GPDL2 PE=1 SV=3	all1051	90.1	2e-18	COG0584	Glycerophosphoryl diester phosphodiesterase	K01126	6e-24	105	smo:SELMODRAFT_108000	glycerophosphoryl diester phosphodiesterase [EC:3.1.4.46]	GO:0006071//glycerol metabolic process;GO:0030643//cellular phosphate ion homeostasis;GO:0016126//sterol biosynthetic process;GO:0007155//cell adhesion;GO:0019252//starch biosynthetic process;GO:0045010//actin nucleation;GO:0010075//regulation of meristem growth;GO:0052546//cell wall pectin metabolic process;GO:0000023//maltose metabolic process;GO:0048767//root hair elongation;GO:0016556//mRNA m…	GO:0008889//glycerophosphodiester phosphodiesterase activity;GO:0004674//protein serine/threonine kinase activity;GO:0005524//ATP binding	GO:0046658//anchored to plasma membrane;GO:0048046//apoplast;GO:0009505//plant-type cell wall;GO:0009507//chloroplast;GO:0009506//plasmodesma
CL1016.Contig4_All	956	265	9.26	7	0.2321	15	0.5373	gi|567219044|ref|XP_006413151.1|	467.2	5e-159	hypothetical protein EUTSA_v10024494mg [Eutrema salsugineum] >gi|557114321|gb|ESQ54604.1| hypothetical protein EUTSA_v10024494mg [Eutrema salsugineum]	gi|297799323|ref|XM_002867500.1|	496	1e-137	Arabidopsis lyrata subsp. lyrata MRH5/SHV3, mRNA	sp|Q9SZ11|GLPQ2_ARATH	437	3e-149	Probable glycerophosphoryl diester phosphodiesterase 2 OS=Arabidopsis thaliana GN=GPDL2 PE=1 SV=3	PA0347	64.3	6e-11	COG0584	Glycerophosphoryl diester phosphodiesterase	K01126	1e-15	77.8	smo:SELMODRAFT_108000	glycerophosphoryl diester phosphodiesterase [EC:3.1.4.46]	GO:0006071//glycerol metabolic process;GO:0030643//cellular phosphate ion homeostasis;GO:0016126//sterol biosynthetic process;GO:0019252//starch biosynthetic process;GO:0010026//trichome differentiation;GO:0052546//cell wall pectin metabolic process;GO:0000023//maltose metabolic process;GO:0048767//root hair elongation;GO:0016556//mRNA modification;GO:0010442//guard cell morphogenesis;GO:0009832/…	GO:0016301//kinase activity;GO:0008889//glycerophosphodiester phosphodiesterase activity	GO:0046658//anchored to plasma membrane;GO:0048046//apoplast;GO:0009505//plant-type cell wall;GO:0009507//chloroplast
CL1017.Contig1_All	1520	154	3.3846	155	3.233	109	2.4555	gi|567145751|ref|XP_006415334.1|	942.2	0	hypothetical protein EUTSA_v10006954mg [Eutrema salsugineum] >gi|557093105|gb|ESQ33687.1| hypothetical protein EUTSA_v10006954mg [Eutrema salsugineum]	gi|297851929|ref|XM_002893800.1|	1982	0	Arabidopsis lyrata subsp. lyrata RECQL2, mRNA	sp|Q9FT73|MED34_ARATH	916	0	Mediator of RNA polymerase II transcription subunit 34 OS=Arabidopsis thaliana GN=MED34 PE=1 SV=1	YMR190c	283	3e-83	COG0514	Superfamily II DNA helicase	K10899	0	916	aly:ARALYDRAFT_891126	ATP-dependent DNA helicase Q1 [EC:3.6.4.12]	GO:0000278//mitotic cell cycle;GO:0032508//DNA duplex unwinding;GO:0045492//xylan biosynthetic process;GO:0006310//DNA recombination;GO:0006396//RNA processing;GO:0010413//glucuronoxylan metabolic process;GO:0006200//ATP catabolic process;GO:0006260//DNA replication;GO:0006281//DNA repair	GO:0005515//protein binding;GO:0043140//ATP-dependent 3'-5' DNA helicase activity;GO:0003676//nucleic acid binding;GO:0005524//ATP binding;GO:0009378//four-way junction helicase activity	GO:0016592//mediator complex
CL1017.Contig2_All	239	0	0	0	0	1	0.1433	gi|567145755|ref|XP_006415335.1|	138.7	1e-38	hypothetical protein EUTSA_v10006954mg [Eutrema salsugineum] >gi|557093106|gb|ESQ33688.1| hypothetical protein EUTSA_v10006954mg [Eutrema salsugineum]	gi|297851929|ref|XM_002893800.1|	295	1e-77	Arabidopsis lyrata subsp. lyrata RECQL2, mRNA	sp|Q9FT73|MED34_ARATH	138	6e-40	Mediator of RNA polymerase II transcription subunit 34 OS=Arabidopsis thaliana GN=MED34 PE=1 SV=1	YMR190c	61.6	3e-12	COG0514	Superfamily II DNA helicase	K10899	8e-40	138	ath:AT1G31360	ATP-dependent DNA helicase Q1 [EC:3.6.4.12]	GO:0000278//mitotic cell cycle;GO:0032508//DNA duplex unwinding;GO:0045492//xylan biosynthetic process;GO:0006310//DNA recombination;GO:0006396//RNA processing;GO:0010413//glucuronoxylan metabolic process;GO:0006200//ATP catabolic process;GO:0006260//DNA replication;GO:0006281//DNA repair	GO:0005515//protein binding;GO:0043140//ATP-dependent 3'-5' DNA helicase activity;GO:0003676//nucleic acid binding;GO:0005524//ATP binding;GO:0009378//four-way junction helicase activity	GO:0016592//mediator complex
CL1018.Contig1_All	3421	1277	12.4699	981	9.0915	32	0.3203	gi|254032062|gb|ACT54615.1|	1984.2	0	phosphoenolpyruvate carboxylase [Brassica napus]	gi|254032061|gb|GQ227671.1|	4530	0	Brassica napus phosphoenolpyruvate carboxylase mRNA, complete cds	sp|Q8GVE8|CAPP4_ARATH	1710	0	Phosphoenolpyruvate carboxylase 4 OS=Arabidopsis thaliana GN=PPC4 PE=2 SV=1	YPO3929	523	5e-169	COG2352	Phosphoenolpyruvate carboxylase	K01595	0	1961	aly:ARALYDRAFT_313369	phosphoenolpyruvate carboxylase [EC:4.1.1.31]	GO:0006099//tricarboxylic acid cycle;GO:0015977//carbon fixation	GO:0008964//phosphoenolpyruvate carboxylase activity	GO:0005737//cytoplasm
CL1018.Contig2_All	2150	0	0	0	0	0	0	gi|254032062|gb|ACT54615.1|	1276.5	0	phosphoenolpyruvate carboxylase [Brassica napus]	gi|254032061|gb|GQ227671.1|	3318	0	Brassica napus phosphoenolpyruvate carboxylase mRNA, complete cds	sp|Q8GVE8|CAPP4_ARATH	1003	0	Phosphoenolpyruvate carboxylase 4 OS=Arabidopsis thaliana GN=PPC4 PE=2 SV=1	PA3687	241	8e-68	COG2352	Phosphoenolpyruvate carboxylase	K01595	0	1212	aly:ARALYDRAFT_313369	phosphoenolpyruvate carboxylase [EC:4.1.1.31]	GO:0006099//tricarboxylic acid cycle;GO:0015977//carbon fixation	GO:0008964//phosphoenolpyruvate carboxylase activity	GO:0005737//cytoplasm
CL1019.Contig1_All	1962	359	6.1125	254	4.1044	253	4.4155	gi|567188464|ref|XP_006404107.1|	1121.3	0	hypothetical protein EUTSA_v10010190mg [Eutrema salsugineum] >gi|557105226|gb|ESQ45560.1| hypothetical protein EUTSA_v10010190mg [Eutrema salsugineum]	gi|332640072|gb|CP002686.1|	1790	0	Arabidopsis thaliana chromosome 3, complete sequence	sp|P0C8A0|PP275_ARATH	1093	0	Pentatricopeptide repeat-containing protein At3g49730 OS=Arabidopsis thaliana GN=At3g49730 PE=2 SV=1	--	--	--	--	--	K15336	2e-40	160	vvi:100259391	tRNA (cytosine38-C5)-methyltransferase [EC:2.1.1.204]	GO:0009560//embryo sac egg cell differentiation;GO:0007131//reciprocal meiotic recombination;GO:0009691//cytokinin biosynthetic process	GO:0005525//GTP binding	GO:0005739//mitochondrion
CL1019.Contig2_All	224	19	2.8335	5	0.7077	2	0.3057	gi|567136540|ref|XP_006393982.1|	124	4e-33	hypothetical protein EUTSA_v10003830mg [Eutrema salsugineum] >gi|557090621|gb|ESQ31268.1| hypothetical protein EUTSA_v10003830mg [Eutrema salsugineum]	gi|297797612|ref|XM_002866645.1|	184	3e-44	Arabidopsis lyrata subsp. lyrata pentatricopeptide repeat-containing protein, mRNA	sp|P0C8A0|PP275_ARATH	115	9e-32	Pentatricopeptide repeat-containing protein At3g49730 OS=Arabidopsis thaliana GN=At3g49730 PE=2 SV=1	--	--	--	--	--	--	--	--	--	--	GO:0009560//embryo sac egg cell differentiation;GO:0007131//reciprocal meiotic recombination;GO:0009691//cytokinin biosynthetic process	GO:0005525//GTP binding	GO:0005739//mitochondrion
CL102.Contig1_All	825	107	4.3327	119	4.5731	36	1.4942	gi|565444418|ref|XP_006284111.1|	324.7	1e-109	hypothetical protein CARUB_v10005244mg [Capsella rubella] >gi|482552816|gb|EOA17009.1| hypothetical protein CARUB_v10005244mg [Capsella rubella]	gi|42567168|ref|NM_118812.3|	383	1e-103	Arabidopsis thaliana molecular chaperone GrpE mRNA, complete cds	--	--	--	--	BMEI1777	80.9	5e-18	COG0576	Molecular chaperone GrpE (heat shock protein)	K03687	1e-110	323	ath:AT4G26780	molecular chaperone GrpE	GO:0010286//heat acclimation;GO:0006457//protein folding;GO:0009220//pyrimidine ribonucleotide biosynthetic process;GO:0009407//toxin catabolic process;GO:0009411//response to UV;GO:0010583//response to cyclopentenone;GO:0050790//regulation of catalytic activity;GO:0006626//protein targeting to mitochondrion	GO:0051087//chaperone binding;GO:0000774//adenyl-nucleotide exchange factor activity;GO:0042803//protein homodimerization activity;GO:0005507//copper ion binding;GO:0005524//ATP binding	GO:0005759//mitochondrial matrix;GO:0009507//chloroplast
CL102.Contig2_All	1195	143	3.9975	107	2.8388	166	4.7566	gi|567179037|ref|XP_006401480.1|	461.5	8e-162	hypothetical protein EUTSA_v10014177mg [Eutrema salsugineum] >gi|557102570|gb|ESQ42933.1| hypothetical protein EUTSA_v10014177mg [Eutrema salsugineum]	gi|145359270|ref|NM_124902.2|	622	1e-175	Arabidopsis thaliana co-chaperone GrpE family protein mRNA, complete cds	--	--	--	--	YOR232w	126	1e-33	COG0576	Molecular chaperone GrpE (heat shock protein)	K03687	5e-116	342	ath:AT4G26780	molecular chaperone GrpE	GO:0010286//heat acclimation;GO:0006457//protein folding;GO:0009220//pyrimidine ribonucleotide biosynthetic process;GO:0009407//toxin catabolic process;GO:0009411//response to UV;GO:0010583//response to cyclopentenone;GO:0050790//regulation of catalytic activity;GO:0006626//protein targeting to mitochondrion	GO:0051087//chaperone binding;GO:0000774//adenyl-nucleotide exchange factor activity;GO:0042803//protein homodimerization activity;GO:0005507//copper ion binding;GO:0005524//ATP binding	GO:0005759//mitochondrial matrix;GO:0009507//chloroplast
CL102.Contig3_All	596	15	0.8408	22	1.1703	5	0.2873	gi|565444418|ref|XP_006284111.1|	180.3	3e-54	hypothetical protein CARUB_v10005244mg [Capsella rubella] >gi|482552816|gb|EOA17009.1| hypothetical protein CARUB_v10005244mg [Capsella rubella]	gi|199580283|gb|AC189587.2|	147	2e-32	Brassica rapa subsp. pekinensis clone KBrH012K23, complete sequence	--	--	--	--	--	--	--	--	--	K03687	2e-54	177	aly:ARALYDRAFT_492124	molecular chaperone GrpE	GO:0010286//heat acclimation;GO:0006457//protein folding;GO:0009220//pyrimidine ribonucleotide biosynthetic process;GO:0009411//response to UV;GO:0006626//protein targeting to mitochondrion	GO:0005515//protein binding;GO:0005507//copper ion binding;GO:0005524//ATP binding	GO:0009507//chloroplast;GO:0005739//mitochondrion
CL102.Contig4_All	1285	727	18.8997	477	11.7688	425	11.3252	gi|18416821|ref|NP_567757.1|	498.8	8e-176	molecular chaperone GrpE [Arabidopsis thaliana] >gi|21593024|gb|AAM64973.1| grpE like protein [Arabidopsis thaliana] >gi|332659851|gb|AEE85251.1| molecular chaperone GrpE [Arabidopsis thaliana]	gi|42567168|ref|NM_118812.3|	807	0	Arabidopsis thaliana molecular chaperone GrpE mRNA, complete cds	--	--	--	--	YOR232w	141	6e-39	COG0576	Molecular chaperone GrpE (heat shock protein)	K03687	3e-177	498	ath:AT4G26780	molecular chaperone GrpE	GO:0010286//heat acclimation;GO:0006457//protein folding;GO:0009220//pyrimidine ribonucleotide biosynthetic process;GO:0009407//toxin catabolic process;GO:0009411//response to UV;GO:0010583//response to cyclopentenone;GO:0050790//regulation of catalytic activity;GO:0006626//protein targeting to mitochondrion	GO:0051087//chaperone binding;GO:0000774//adenyl-nucleotide exchange factor activity;GO:0042803//protein homodimerization activity;GO:0005507//copper ion binding;GO:0005524//ATP binding	GO:0005759//mitochondrial matrix;GO:0009507//chloroplast
CL102.Contig5_All	511	18	1.1767	15	0.9307	5	0.335	gi|18416821|ref|NP_567757.1|	152.5	6e-44	molecular chaperone GrpE [Arabidopsis thaliana] >gi|21593024|gb|AAM64973.1| grpE like protein [Arabidopsis thaliana] >gi|332659851|gb|AEE85251.1| molecular chaperone GrpE [Arabidopsis thaliana]	gi|199580283|gb|AC189587.2|	143	2e-31	Brassica rapa subsp. pekinensis clone KBrH012K23, complete sequence	--	--	--	--	--	--	--	--	--	K03687	3e-45	152	ath:AT4G26780	molecular chaperone GrpE	GO:0010286//heat acclimation;GO:0006457//protein folding;GO:0009220//pyrimidine ribonucleotide biosynthetic process;GO:0006626//protein targeting to mitochondrion	GO:0005515//protein binding;GO:0030554//adenyl nucleotide binding;GO:0005507//copper ion binding	GO:0009507//chloroplast;GO:0005739//mitochondrion
CL102.Contig6_All	1220	16	0.4381	0	0	8	0.2245	gi|567179037|ref|XP_006401480.1|	457.2	5e-160	hypothetical protein EUTSA_v10014177mg [Eutrema salsugineum] >gi|557102570|gb|ESQ42933.1| hypothetical protein EUTSA_v10014177mg [Eutrema salsugineum]	gi|145359270|ref|NM_124902.2|	607	1e-170	Arabidopsis thaliana co-chaperone GrpE family protein mRNA, complete cds	--	--	--	--	YOR232w	130	4e-35	COG0576	Molecular chaperone GrpE (heat shock protein)	K03687	5e-123	360	ath:AT4G26780	molecular chaperone GrpE	GO:0010286//heat acclimation;GO:0006457//protein folding;GO:0009220//pyrimidine ribonucleotide biosynthetic process;GO:0009407//toxin catabolic process;GO:0009411//response to UV;GO:0010583//response to cyclopentenone;GO:0050790//regulation of catalytic activity;GO:0006626//protein targeting to mitochondrion	GO:0051087//chaperone binding;GO:0000774//adenyl-nucleotide exchange factor activity;GO:0042803//protein homodimerization activity;GO:0005507//copper ion binding;GO:0005524//ATP binding	GO:0005759//mitochondrial matrix;GO:0009507//chloroplast
CL102.Contig7_All	1188	349	9.8137	218	5.8178	100	2.8823	gi|565444418|ref|XP_006284111.1|	479.2	1e-168	hypothetical protein CARUB_v10005244mg [Capsella rubella] >gi|482552816|gb|EOA17009.1| hypothetical protein CARUB_v10005244mg [Capsella rubella]	gi|42567168|ref|NM_118812.3|	731	0	Arabidopsis thaliana molecular chaperone GrpE mRNA, complete cds	sp|Q9LF10|CRS1_ARATH	52	5e-07	Chloroplastic group IIA intron splicing facilitator CRS1, chloroplastic OS=Arabidopsis thaliana GN=At5g16180 PE=2 SV=2	YOR232w	140	9e-39	COG0576	Molecular chaperone GrpE (heat shock protein)	K03687	1e-167	473	aly:ARALYDRAFT_492124	molecular chaperone GrpE	GO:0010286//heat acclimation;GO:0006457//protein folding;GO:0009220//pyrimidine ribonucleotide biosynthetic process;GO:0009407//toxin catabolic process;GO:0009411//response to UV;GO:0010583//response to cyclopentenone;GO:0050790//regulation of catalytic activity;GO:0006626//protein targeting to mitochondrion	GO:0051087//chaperone binding;GO:0000774//adenyl-nucleotide exchange factor activity;GO:0042803//protein homodimerization activity;GO:0005507//copper ion binding;GO:0005524//ATP binding	GO:0005759//mitochondrial matrix;GO:0009507//chloroplast
CL1020.Contig1_All	1884	748	13.2631	514	8.6497	299	5.4344	gi|567150863|ref|XP_006416762.1|	1105.5	0	hypothetical protein EUTSA_v10007218mg [Eutrema salsugineum] >gi|557094533|gb|ESQ35115.1| hypothetical protein EUTSA_v10007218mg [Eutrema salsugineum]	gi|186478564|ref|NM_101551.3|	2046	0	Arabidopsis thaliana Dol-P-Man:Man(6)GlcNAc(2)-PP-Dol alpha-1,2-mannosyltransferase mRNA, complete cds	sp|Q9FZ49|ALG9_ARATH	1096	0	Dol-P-Man:Man(6)GlcNAc(2)-PP-Dol alpha-1,2-mannosyltransferase OS=Arabidopsis thaliana GN=ALG9 PE=1 SV=1	--	--	--	--	--	K03846	0	1096	aly:ARALYDRAFT_471892	alpha-1,2-mannosyltransferase [EC:2.4.1.259 2.4.1.261]	GO:0006490//oligosaccharide-lipid intermediate biosynthetic process;GO:0030433//ER-associated protein catabolic process	GO:0004377//GDP-Man:Man3GlcNAc2-PP-Dol alpha-1,2-mannosyltransferase activity;GO:0030246//carbohydrate binding	GO:0005783//endoplasmic reticulum
CL1021.Contig1_All	4785	2	0.014	0	0	2	0.0143	gi|310947137|sp|Q9SB63.2|MOS1_ARATH	2100.1	0	RecName: Full=Protein MODIFIER OF SNC1 1; AltName: Full=MODIFIER OF snc1, 1 >gi|298569770|gb|ADI87413.1| MOS1 [Arabidopsis thaliana]	gi|298569769|gb|HM208348.1|	2791	0	Arabidopsis thaliana MOS1 mRNA, complete cds	sp|Q9SB63|MOS1_ARATH	2100	0	Protein MODIFIER OF SNC1 1 OS=Arabidopsis thaliana GN=MOS1 PE=1 SV=2	--	--	--	--	--	K11294	2e-09	63.9	gmx:100779929	nucleolin	GO:0040029//regulation of gene expression, epigenetic;GO:0000956//nuclear-transcribed mRNA catabolic process;GO:0045492//xylan biosynthetic process;GO:0010413//glucuronoxylan metabolic process	-	-
CL1021.Contig2_All	2670	735	9.196	444	5.2722	375	4.8093	gi|310947137|sp|Q9SB63.2|MOS1_ARATH	1181.8	0	RecName: Full=Protein MODIFIER OF SNC1 1; AltName: Full=MODIFIER OF snc1, 1 >gi|298569770|gb|ADI87413.1| MOS1 [Arabidopsis thaliana]	gi|298569769|gb|HM208348.1|	1582	0	Arabidopsis thaliana MOS1 mRNA, complete cds	sp|Q9SB63|MOS1_ARATH	1181	0	Protein MODIFIER OF SNC1 1 OS=Arabidopsis thaliana GN=MOS1 PE=1 SV=2	PA2976	52	6e-06	COG1530	Ribonucleases G and E	K13210	2e-07	56.2	vvi:100253453	far upstream element-binding protein	GO:0040029//regulation of gene expression, epigenetic;GO:0000956//nuclear-transcribed mRNA catabolic process;GO:0045492//xylan biosynthetic process;GO:0010413//glucuronoxylan metabolic process	-	-
CL1021.Contig3_All	4853	12	0.0826	6	0.0392	4	0.0282	gi|567219540|ref|XP_006413399.1|	2084.7	0	hypothetical protein EUTSA_v10024213mg [Eutrema salsugineum] >gi|557114569|gb|ESQ54852.1| hypothetical protein EUTSA_v10024213mg [Eutrema salsugineum]	gi|298569769|gb|HM208348.1|	2674	0	Arabidopsis thaliana MOS1 mRNA, complete cds	sp|Q9SB63|MOS1_ARATH	2080	0	Protein MODIFIER OF SNC1 1 OS=Arabidopsis thaliana GN=MOS1 PE=1 SV=2	--	--	--	--	--	K11294	2e-09	63.9	gmx:100779929	nucleolin	GO:0040029//regulation of gene expression, epigenetic;GO:0000956//nuclear-transcribed mRNA catabolic process;GO:0045492//xylan biosynthetic process;GO:0010413//glucuronoxylan metabolic process	-	-
CL1021.Contig4_All	304	1	0.1099	0	0	0	0	gi|310947137|sp|Q9SB63.2|MOS1_ARATH	139	9e-38	RecName: Full=Protein MODIFIER OF SNC1 1; AltName: Full=MODIFIER OF snc1, 1 >gi|298569770|gb|ADI87413.1| MOS1 [Arabidopsis thaliana]	gi|332656411|gb|CP002687.1|	182	2e-43	Arabidopsis thaliana chromosome 4, complete genome	sp|Q9SB63|MOS1_ARATH	139	1e-39	Protein MODIFIER OF SNC1 1 OS=Arabidopsis thaliana GN=MOS1 PE=1 SV=2	--	--	--	--	--	--	--	--	--	--	GO:0040029//regulation of gene expression, epigenetic;GO:0000956//nuclear-transcribed mRNA catabolic process;GO:0045492//xylan biosynthetic process;GO:0010413//glucuronoxylan metabolic process	-	-
CL1021.Contig5_All	2728	65	0.796	32	0.3719	23	0.2887	gi|567219540|ref|XP_006413399.1|	1233.8	0	hypothetical protein EUTSA_v10024213mg [Eutrema salsugineum] >gi|557114569|gb|ESQ54852.1| hypothetical protein EUTSA_v10024213mg [Eutrema salsugineum]	gi|298569769|gb|HM208348.1|	1834	0	Arabidopsis thaliana MOS1 mRNA, complete cds	sp|Q9SB63|MOS1_ARATH	1227	0	Protein MODIFIER OF SNC1 1 OS=Arabidopsis thaliana GN=MOS1 PE=1 SV=2	--	--	--	--	--	--	--	--	--	--	GO:0040029//regulation of gene expression, epigenetic;GO:0000956//nuclear-transcribed mRNA catabolic process;GO:0045492//xylan biosynthetic process;GO:0010413//glucuronoxylan metabolic process	-	-
CL1021.Contig6_All	4878	4	0.0274	2	0.013	2	0.014	gi|310947137|sp|Q9SB63.2|MOS1_ARATH	2100.1	0	RecName: Full=Protein MODIFIER OF SNC1 1; AltName: Full=MODIFIER OF snc1, 1 >gi|298569770|gb|ADI87413.1| MOS1 [Arabidopsis thaliana]	gi|298569769|gb|HM208348.1|	2791	0	Arabidopsis thaliana MOS1 mRNA, complete cds	sp|Q9SB63|MOS1_ARATH	2100	0	Protein MODIFIER OF SNC1 1 OS=Arabidopsis thaliana GN=MOS1 PE=1 SV=2	--	--	--	--	--	K11294	2e-09	63.9	gmx:100779929	nucleolin	GO:0040029//regulation of gene expression, epigenetic;GO:0000956//nuclear-transcribed mRNA catabolic process;GO:0045492//xylan biosynthetic process;GO:0010413//glucuronoxylan metabolic process	-	-
CL1021.Contig7_All	4760	4	0.0281	6	0.04	2	0.0144	gi|567219540|ref|XP_006413399.1|	2084.7	0	hypothetical protein EUTSA_v10024213mg [Eutrema salsugineum] >gi|557114569|gb|ESQ54852.1| hypothetical protein EUTSA_v10024213mg [Eutrema salsugineum]	gi|298569769|gb|HM208348.1|	2674	0	Arabidopsis thaliana MOS1 mRNA, complete cds	sp|Q9SB63|MOS1_ARATH	2080	0	Protein MODIFIER OF SNC1 1 OS=Arabidopsis thaliana GN=MOS1 PE=1 SV=2	--	--	--	--	--	K11294	2e-09	63.9	gmx:100779929	nucleolin	GO:0040029//regulation of gene expression, epigenetic;GO:0000956//nuclear-transcribed mRNA catabolic process;GO:0045492//xylan biosynthetic process;GO:0010413//glucuronoxylan metabolic process	-	-
CL1021.Contig8_All	4873	1705	11.6883	1131	7.3584	727	5.1085	gi|567219540|ref|XP_006413399.1|	2145.2	0	hypothetical protein EUTSA_v10024213mg [Eutrema salsugineum] >gi|557114569|gb|ESQ54852.1| hypothetical protein EUTSA_v10024213mg [Eutrema salsugineum]	gi|298569769|gb|HM208348.1|	2914	0	Arabidopsis thaliana MOS1 mRNA, complete cds	sp|Q9SB63|MOS1_ARATH	2115	0	Protein MODIFIER OF SNC1 1 OS=Arabidopsis thaliana GN=MOS1 PE=1 SV=2	--	--	--	--	--	K03243	1e-06	55.1	mtr:MTR_1g099000	translation initiation factor 5B	GO:0040029//regulation of gene expression, epigenetic;GO:0000956//nuclear-transcribed mRNA catabolic process;GO:0045492//xylan biosynthetic process;GO:0010413//glucuronoxylan metabolic process	-	-
CL1021.Contig9_All	1034	0	0	0	0	0	0	gi|310947137|sp|Q9SB63.2|MOS1_ARATH	441.8	2e-142	RecName: Full=Protein MODIFIER OF SNC1 1; AltName: Full=MODIFIER OF snc1, 1 >gi|298569770|gb|ADI87413.1| MOS1 [Arabidopsis thaliana]	gi|298569769|gb|HM208348.1|	888	0	Arabidopsis thaliana MOS1 mRNA, complete cds	sp|Q9SB63|MOS1_ARATH	441	3e-144	Protein MODIFIER OF SNC1 1 OS=Arabidopsis thaliana GN=MOS1 PE=1 SV=2	--	--	--	--	--	--	--	--	--	--	GO:0040029//regulation of gene expression, epigenetic;GO:0000956//nuclear-transcribed mRNA catabolic process;GO:0045492//xylan biosynthetic process;GO:0010413//glucuronoxylan metabolic process	-	-
CL1022.Contig1_All	546	3179	194.501	2802	162.702	1636	102.6	gi|565468464|ref|XP_006292105.1|	144.4	2e-43	hypothetical protein CARUB_v10018301mg, partial [Capsella rubella] >gi|482560812|gb|EOA25003.1| hypothetical protein CARUB_v10018301mg, partial [Capsella rubella]	gi|186511195|ref|NM_115816.5|	341	5e-91	Arabidopsis thaliana 60S ribosomal protein L38 mRNA, complete cds	sp|O22860|RL38_ARATH	139	1e-43	60S ribosomal protein L38 OS=Arabidopsis thaliana GN=RPL38A PE=3 SV=1	--	--	--	--	--	K02923	3e-43	139	aly:ARALYDRAFT_486421	large subunit ribosomal protein L38e	GO:0042254//ribosome biogenesis;GO:0001510//RNA methylation;GO:0006412//translation	GO:0003735//structural constituent of ribosome	GO:0022625//cytosolic large ribosomal subunit
CL1022.Contig2_All	567	33	1.9443	38	2.1248	39	2.3553	gi|565468464|ref|XP_006292105.1|	144.1	4e-43	hypothetical protein CARUB_v10018301mg, partial [Capsella rubella] >gi|482560812|gb|EOA25003.1| hypothetical protein CARUB_v10018301mg, partial [Capsella rubella]	gi|42569893|ref|NM_129907.2|	341	6e-91	Arabidopsis thaliana 60S ribosomal protein L38 mRNA, complete cds	sp|O22860|RL38_ARATH	138	4e-43	60S ribosomal protein L38 OS=Arabidopsis thaliana GN=RPL38A PE=3 SV=1	--	--	--	--	--	K02923	9e-43	138	aly:ARALYDRAFT_486421	large subunit ribosomal protein L38e	GO:0042254//ribosome biogenesis;GO:0001510//RNA methylation;GO:0006412//translation	GO:0003735//structural constituent of ribosome	GO:0022625//cytosolic large ribosomal subunit
CL1022.Contig3_All	2002	1220	20.3573	2064	32.6862	880	15.0514	gi|61104883|gb|AAX38236.1|	815.1	0	strictosidine synthase family protein [Brassica napus]	gi|94410637|gb|AY940438.3|	1901	0	Brassica napus strictosidine synthase family protein mRNA, complete cds	sp|P68174|STSY_RAUMA	187	2e-53	Strictosidine synthase (Fragment) OS=Rauvolfia mannii GN=STR1 PE=3 SV=1	PA1293	201	6e-58	COG3386	Gluconolactonase	K01757	1e-47	172	aly:ARALYDRAFT_476542	strictosidine synthase [EC:4.3.3.2]	GO:0009821//alkaloid biosynthetic process;GO:0010584//pollen exine formation;GO:0009860//pollen tube growth;GO:0009827//plant-type cell wall modification	GO:0016844//strictosidine synthase activity	GO:0005739//mitochondrion
CL1023.Contig1_All	763	84	3.6777	44	1.8283	12	0.5385	gi|567216706|ref|XP_006411982.1|	394.4	3e-139	hypothetical protein EUTSA_v10027520mg [Eutrema salsugineum] >gi|557113152|gb|ESQ53435.1| hypothetical protein EUTSA_v10027520mg [Eutrema salsugineum]	gi|297798241|ref|XM_002866959.1|	454	1e-125	Arabidopsis lyrata subsp. lyrata zinc finger family protein, mRNA	sp|Q6QPM2|GAT19_ARATH	354	2e-125	GATA transcription factor 19 OS=Arabidopsis thaliana GN=GATA19 PE=2 SV=2	ECU02g0260	53.5	1e-07	COG5641	GATA Zn-finger-containing transcription factor	--	--	--	--	--	GO:0009909//regulation of flower development;GO:0006355//regulation of transcription, DNA-dependent;GO:0009790//embryo development	GO:0008270//zinc ion binding;GO:0043565//sequence-specific DNA binding;GO:0003700//sequence-specific DNA binding transcription factor activity	GO:0005634//nucleus
CL1023.Contig2_All	811	71	2.9246	63	2.4628	9	0.38	gi|567216706|ref|XP_006411982.1|	401.4	1e-141	hypothetical protein EUTSA_v10027520mg [Eutrema salsugineum] >gi|557113152|gb|ESQ53435.1| hypothetical protein EUTSA_v10027520mg [Eutrema salsugineum]	gi|297798241|ref|XM_002866959.1|	531	1e-148	Arabidopsis lyrata subsp. lyrata zinc finger family protein, mRNA	sp|Q6QPM2|GAT19_ARATH	373	1e-132	GATA transcription factor 19 OS=Arabidopsis thaliana GN=GATA19 PE=2 SV=2	ECU02g0260	52.8	2e-07	COG5641	GATA Zn-finger-containing transcription factor	--	--	--	--	--	GO:0009909//regulation of flower development;GO:0006355//regulation of transcription, DNA-dependent;GO:0009790//embryo development	GO:0008270//zinc ion binding;GO:0043565//sequence-specific DNA binding;GO:0003700//sequence-specific DNA binding transcription factor activity	GO:0005634//nucleus
CL1024.Contig1_All	1669	749	14.9917	536	10.1819	775	15.9002	gi|567120723|ref|XP_006390207.1|	812.4	0	hypothetical protein EUTSA_v10018510mg [Eutrema salsugineum] >gi|557086641|gb|ESQ27493.1| hypothetical protein EUTSA_v10018510mg [Eutrema salsugineum]	gi|133778899|gb|BT030377.1|	932	0	Arabidopsis thaliana At1g76360 mRNA, complete cds	sp|P43293|NAK_ARATH	385	5e-130	Probable serine/threonine-protein kinase NAK OS=Arabidopsis thaliana GN=NAK PE=2 SV=2	CAC0404_1	87	3e-18	COG0515	Serine/threonine protein kinase	K00924	4e-127	379	ath:AT4G35600	[EC:2.7.1.-]	GO:0000186//activation of MAPKK activity	GO:0005524//ATP binding;GO:0004709//MAP kinase kinase kinase activity	-
CL1024.Contig2_All	250	13	1.7371	0	0	14	1.9175	gi|567120723|ref|XP_006390207.1|	162.5	5e-48	hypothetical protein EUTSA_v10018510mg [Eutrema salsugineum] >gi|557086641|gb|ESQ27493.1| hypothetical protein EUTSA_v10018510mg [Eutrema salsugineum]	gi|199580023|gb|AC189339.2|	351	2e-94	Brassica rapa subsp. pekinensis clone KBrB041J04, complete sequence	sp|Q9FM85|Y5564_ARATH	97.4	1e-25	Probable receptor-like protein kinase At5g56460 OS=Arabidopsis thaliana GN=At5g56460 PE=1 SV=1	--	--	--	--	--	K05658	3e-24	95.5	vvi:100262734	ATP-binding cassette, subfamily B (MDR/TAP), member 1	GO:0000186//activation of MAPKK activity	GO:0005524//ATP binding;GO:0004709//MAP kinase kinase kinase activity	-
CL1025.Contig1_All	994	214	7.192	99	3.1577	49	1.688	gi|567219564|ref|XP_006413411.1|	375.9	4e-130	hypothetical protein EUTSA_v10026080mg [Eutrema salsugineum] >gi|557114581|gb|ESQ54864.1| hypothetical protein EUTSA_v10026080mg [Eutrema salsugineum]	gi|30686590|ref|NM_118592.2|	626	1e-176	Arabidopsis thaliana uncharacterized protein mRNA, complete cds	--	--	--	--	--	--	--	--	--	--	--	--	--	--	-	-	GO:0005634//nucleus;GO:0005737//cytoplasm
CL1025.Contig2_All	909	0	0	0	0	0	0	gi|567219564|ref|XP_006413411.1|	360.1	2e-124	hypothetical protein EUTSA_v10026080mg [Eutrema salsugineum] >gi|557114581|gb|ESQ54864.1| hypothetical protein EUTSA_v10026080mg [Eutrema salsugineum]	gi|30686590|ref|NM_118592.2|	490	1e-135	Arabidopsis thaliana uncharacterized protein mRNA, complete cds	--	--	--	--	--	--	--	--	--	--	--	--	--	--	-	-	GO:0005634//nucleus;GO:0005737//cytoplasm
CL1025.Contig3_All	1006	14	0.4649	10	0.3152	4	0.1362	gi|567219564|ref|XP_006413411.1|	393.7	5e-137	hypothetical protein EUTSA_v10026080mg [Eutrema salsugineum] >gi|557114581|gb|ESQ54864.1| hypothetical protein EUTSA_v10026080mg [Eutrema salsugineum]	gi|30686590|ref|NM_118592.2|	628	1e-177	Arabidopsis thaliana uncharacterized protein mRNA, complete cds	--	--	--	--	--	--	--	--	--	--	--	--	--	--	-	-	GO:0005634//nucleus;GO:0005737//cytoplasm
CL1025.Contig4_All	962	58	2.0141	6	0.1977	10	0.3559	gi|567219564|ref|XP_006413411.1|	347.8	3e-119	hypothetical protein EUTSA_v10026080mg [Eutrema salsugineum] >gi|557114581|gb|ESQ54864.1| hypothetical protein EUTSA_v10026080mg [Eutrema salsugineum]	gi|30686590|ref|NM_118592.2|	490	1e-135	Arabidopsis thaliana uncharacterized protein mRNA, complete cds	--	--	--	--	--	--	--	--	--	--	--	--	--	--	-	-	GO:0005634//nucleus;GO:0005737//cytoplasm
CL1025.Contig5_All	930	4	0.1437	0	0	0	0	gi|567219564|ref|XP_006413411.1|	379.4	8e-132	hypothetical protein EUTSA_v10026080mg [Eutrema salsugineum] >gi|557114581|gb|ESQ54864.1| hypothetical protein EUTSA_v10026080mg [Eutrema salsugineum]	gi|30686590|ref|NM_118592.2|	624	1e-176	Arabidopsis thaliana uncharacterized protein mRNA, complete cds	--	--	--	--	--	--	--	--	--	--	--	--	--	--	-	-	GO:0005634//nucleus;GO:0005737//cytoplasm
CL1025.Contig6_All	985	10	0.3391	0	0	0	0	gi|567219564|ref|XP_006413411.1|	374.4	1e-129	hypothetical protein EUTSA_v10026080mg [Eutrema salsugineum] >gi|557114581|gb|ESQ54864.1| hypothetical protein EUTSA_v10026080mg [Eutrema salsugineum]	gi|30686590|ref|NM_118592.2|	494	1e-136	Arabidopsis thaliana uncharacterized protein mRNA, complete cds	--	--	--	--	--	--	--	--	--	--	--	--	--	--	-	-	GO:0005634//nucleus;GO:0005737//cytoplasm
CL1025.Contig7_All	983	49	1.6652	21	0.6773	13	0.4528	gi|567219564|ref|XP_006413411.1|	365.9	3e-126	hypothetical protein EUTSA_v10026080mg [Eutrema salsugineum] >gi|557114581|gb|ESQ54864.1| hypothetical protein EUTSA_v10026080mg [Eutrema salsugineum]	gi|30686590|ref|NM_118592.2|	617	1e-173	Arabidopsis thaliana uncharacterized protein mRNA, complete cds	--	--	--	--	--	--	--	--	--	--	--	--	--	--	-	-	GO:0005634//nucleus;GO:0005737//cytoplasm
CL1026.Contig1_All	495	6	0.4049	0	0	1	0.0692	gi|567201957|ref|XP_006407844.1|	205.3	2e-63	hypothetical protein EUTSA_v10020790mg [Eutrema salsugineum] >gi|557108990|gb|ESQ49297.1| hypothetical protein EUTSA_v10020790mg [Eutrema salsugineum]	gi|199580271|gb|AC189577.2|	484	1e-134	Brassica rapa subsp. pekinensis clone KBrH011G10, complete sequence	sp|Q9SRT0|PUB9_ARATH	202	6e-64	U-box domain-containing protein 9 OS=Arabidopsis thaliana GN=PUB9 PE=1 SV=1	--	--	--	--	--	--	--	--	--	--	GO:0046777//protein autophosphorylation;GO:0071215//cellular response to abscisic acid stimulus;GO:0016567//protein ubiquitination	GO:0004842//ubiquitin-protein ligase activity;GO:0070696//transmembrane receptor protein serine/threonine kinase binding	GO:0000151//ubiquitin ligase complex;GO:0005737//cytoplasm;GO:0005634//nucleus;GO:0005886//plasma membrane
CL1026.Contig2_All	342	272	26.5685	268	24.8443	94	9.4115	gi|297829282|ref|XP_002882523.1|	193.7	4e-61	hypothetical protein ARALYDRAFT_896898 [Arabidopsis lyrata subsp. lyrata] >gi|297328363|gb|EFH58782.1| hypothetical protein ARALYDRAFT_896898 [Arabidopsis lyrata subsp. lyrata]	gi|199580271|gb|AC189577.2|	502	1e-139	Brassica rapa subsp. pekinensis clone KBrH011G10, complete sequence	sp|Q9SRT0|PUB9_ARATH	193	3e-61	U-box domain-containing protein 9 OS=Arabidopsis thaliana GN=PUB9 PE=1 SV=1	--	--	--	--	--	--	--	--	--	--	GO:0046777//protein autophosphorylation;GO:0071215//cellular response to abscisic acid stimulus;GO:0016567//protein ubiquitination	GO:0004842//ubiquitin-protein ligase activity;GO:0070696//transmembrane receptor protein serine/threonine kinase binding	GO:0000151//ubiquitin ligase complex;GO:0005737//cytoplasm;GO:0005634//nucleus;GO:0005886//plasma membrane
CL1026.Contig3_All	862	22	0.8526	23	0.8459	11	0.437	gi|297789349|ref|XP_002862652.1|	392.9	2e-134	armadillo/beta-catenin repeat family protein [Arabidopsis lyrata subsp. lyrata] >gi|297308299|gb|EFH38910.1| armadillo/beta-catenin repeat family protein [Arabidopsis lyrata subsp. lyrata]	gi|199580271|gb|AC189577.2|	470	1e-129	Brassica rapa subsp. pekinensis clone KBrH011G10, complete sequence	sp|Q9SRT0|PUB9_ARATH	387	6e-134	U-box domain-containing protein 9 OS=Arabidopsis thaliana GN=PUB9 PE=1 SV=1	--	--	--	--	--	K09561	1e-07	53.1	vcn:VOLCADRAFT_67840	STIP1 homology and U-box containing protein 1 [EC:6.3.2.19]	GO:0046777//protein autophosphorylation;GO:0071215//cellular response to abscisic acid stimulus;GO:0016567//protein ubiquitination	GO:0004842//ubiquitin-protein ligase activity;GO:0070696//transmembrane receptor protein serine/threonine kinase binding	GO:0000151//ubiquitin ligase complex;GO:0005737//cytoplasm;GO:0005634//nucleus;GO:0005886//plasma membrane
CL1026.Contig4_All	1563	788	16.8419	834	16.9171	272	5.9589	gi|297789349|ref|XP_002862652.1|	779.6	0	armadillo/beta-catenin repeat family protein [Arabidopsis lyrata subsp. lyrata] >gi|297308299|gb|EFH38910.1| armadillo/beta-catenin repeat family protein [Arabidopsis lyrata subsp. lyrata]	gi|199580271|gb|AC189577.2|	1304	0	Brassica rapa subsp. pekinensis clone KBrH011G10, complete sequence	sp|Q9SRT0|PUB9_ARATH	777	0	U-box domain-containing protein 9 OS=Arabidopsis thaliana GN=PUB9 PE=1 SV=1	--	--	--	--	--	K14431	3e-08	57.8	aly:ARALYDRAFT_311885	transcription factor TGA	GO:0046777//protein autophosphorylation;GO:0071215//cellular response to abscisic acid stimulus;GO:0016567//protein ubiquitination	GO:0004842//ubiquitin-protein ligase activity;GO:0070696//transmembrane receptor protein serine/threonine kinase binding	GO:0000151//ubiquitin ligase complex;GO:0005737//cytoplasm;GO:0005634//nucleus;GO:0005886//plasma membrane
CL1026.Contig5_All	1024	828	27.0119	606	18.7625	54	1.8057	gi|567201957|ref|XP_006407844.1|	491.9	5e-173	hypothetical protein EUTSA_v10020790mg [Eutrema salsugineum] >gi|557108990|gb|ESQ49297.1| hypothetical protein EUTSA_v10020790mg [Eutrema salsugineum]	gi|42563578|ref|NM_111615.3|	668	0	Arabidopsis thaliana ARM domain-containing protein mRNA, complete cds	sp|Q9SRT0|PUB9_ARATH	480	1e-169	U-box domain-containing protein 9 OS=Arabidopsis thaliana GN=PUB9 PE=1 SV=1	--	--	--	--	--	K09561	6e-07	51.6	vcn:VOLCADRAFT_67840	STIP1 homology and U-box containing protein 1 [EC:6.3.2.19]	GO:0046777//protein autophosphorylation;GO:0071215//cellular response to abscisic acid stimulus;GO:0016567//protein ubiquitination	GO:0004842//ubiquitin-protein ligase activity;GO:0070696//transmembrane receptor protein serine/threonine kinase binding	GO:0000151//ubiquitin ligase complex;GO:0005737//cytoplasm;GO:0005634//nucleus;GO:0005886//plasma membrane
CL1026.Contig6_All	1810	2599	47.9681	3193	55.9292	1137	21.51	gi|18397921|ref|NP_566304.1|	795.4	0	ARM domain-containing protein [Arabidopsis thaliana] >gi|75207393|sp|Q9SRT0.1|PUB9_ARATH RecName: Full=U-box domain-containing protein 9; AltName: Full=Plant U-box protein 9 >gi|19715649|gb|AAL91644.1| AT3g07360/F21O3_7 [Arabidopsis thaliana] >gi|332641011|gb|AEE74532.1| ARM domain-containing protein [Arabidopsis thaliana]	gi|297789348|ref|XM_002862606.1|	1261	0	Arabidopsis lyrata subsp. lyrata armadillo/beta-catenin repeat family protein, mRNA	sp|Q9SRT0|PUB9_ARATH	795	0	U-box domain-containing protein 9 OS=Arabidopsis thaliana GN=PUB9 PE=1 SV=1	--	--	--	--	--	K09561	8e-08	55.5	vcn:VOLCADRAFT_67840	STIP1 homology and U-box containing protein 1 [EC:6.3.2.19]	GO:0046777//protein autophosphorylation;GO:0071215//cellular response to abscisic acid stimulus;GO:0016567//protein ubiquitination	GO:0004842//ubiquitin-protein ligase activity;GO:0070696//transmembrane receptor protein serine/threonine kinase binding	GO:0000151//ubiquitin ligase complex;GO:0005737//cytoplasm;GO:0005634//nucleus;GO:0005886//plasma membrane
CL1026.Contig7_All	448	0	0	0	0	0	0	gi|567201957|ref|XP_006407844.1|	174.1	1e-51	hypothetical protein EUTSA_v10020790mg [Eutrema salsugineum] >gi|557108990|gb|ESQ49297.1| hypothetical protein EUTSA_v10020790mg [Eutrema salsugineum]	gi|199580271|gb|AC189577.2|	531	1e-148	Brassica rapa subsp. pekinensis clone KBrH011G10, complete sequence	sp|Q9SRT0|PUB9_ARATH	170	8e-52	U-box domain-containing protein 9 OS=Arabidopsis thaliana GN=PUB9 PE=1 SV=1	--	--	--	--	--	--	--	--	--	--	GO:0046777//protein autophosphorylation;GO:0071215//cellular response to abscisic acid stimulus;GO:0016567//protein ubiquitination	GO:0004842//ubiquitin-protein ligase activity;GO:0070696//transmembrane receptor protein serine/threonine kinase binding	GO:0000151//ubiquitin ligase complex;GO:0005737//cytoplasm;GO:0005634//nucleus;GO:0005886//plasma membrane
CL1026.Contig8_All	515	0	0	0	0	0	0	gi|567201957|ref|XP_006407844.1|	243	5e-78	hypothetical protein EUTSA_v10020790mg [Eutrema salsugineum] >gi|557108990|gb|ESQ49297.1| hypothetical protein EUTSA_v10020790mg [Eutrema salsugineum]	gi|199580271|gb|AC189577.2|	500	1e-139	Brassica rapa subsp. pekinensis clone KBrH011G10, complete sequence	sp|Q9SRT0|PUB9_ARATH	239	4e-78	U-box domain-containing protein 9 OS=Arabidopsis thaliana GN=PUB9 PE=1 SV=1	--	--	--	--	--	K09561	2e-08	53.1	vcn:VOLCADRAFT_67840	STIP1 homology and U-box containing protein 1 [EC:6.3.2.19]	GO:0046777//protein autophosphorylation;GO:0071215//cellular response to abscisic acid stimulus;GO:0016567//protein ubiquitination	GO:0004842//ubiquitin-protein ligase activity;GO:0070696//transmembrane receptor protein serine/threonine kinase binding	GO:0000151//ubiquitin ligase complex;GO:0005737//cytoplasm;GO:0005634//nucleus;GO:0005886//plasma membrane
CL1027.Contig10_All	3730	0	0	0	0	0	0	gi|565457899|ref|XP_006286949.1|	1942.9	0	hypothetical protein CARUB_v10000095mg [Capsella rubella] >gi|482555655|gb|EOA19847.1| hypothetical protein CARUB_v10000095mg [Capsella rubella]	gi|334187725|ref|NM_001203395.1|	2044	0	Arabidopsis thaliana exportin 1A mRNA, complete cds	--	--	--	--	SPAC1805.17	926	0	COG5101	Importin beta-related nuclear transport receptor	K14290	0	1937	aly:ARALYDRAFT_909689	exportin-1	GO:0007010//cytoskeleton organization;GO:0006094//gluconeogenesis;GO:0000741//karyogamy;GO:0000059//protein import into nucleus, docking;GO:0000911//cytokinesis by cell plate formation;GO:0010498//proteasomal protein catabolic process;GO:0006611//protein export from nucleus;GO:0009560//embryo sac egg cell differentiation;GO:0009846//pollen germination;GO:0009555//pollen development;GO:0009165//nu…	GO:0008565//protein transporter activity;GO:0008536//Ran GTPase binding;GO:0004872//receptor activity	GO:0005829//cytosol;GO:0005643//nuclear pore;GO:0009506//plasmodesma
CL1027.Contig11_All	3749	186	1.6574	131	1.1078	114	1.0412	gi|567174800|ref|XP_006400241.1|	2019.2	0	hypothetical protein EUTSA_v10012517mg [Eutrema salsugineum] >gi|557101331|gb|ESQ41694.1| hypothetical protein EUTSA_v10012517mg [Eutrema salsugineum]	gi|334187725|ref|NM_001203395.1|	2813	0	Arabidopsis thaliana exportin 1A mRNA, complete cds	--	--	--	--	SPAC1805.17	934	0	COG5101	Importin beta-related nuclear transport receptor	K14290	0	2013	aly:ARALYDRAFT_909689	exportin-1	GO:0007010//cytoskeleton organization;GO:0006094//gluconeogenesis;GO:0000741//karyogamy;GO:0000059//protein import into nucleus, docking;GO:0000911//cytokinesis by cell plate formation;GO:0010498//proteasomal protein catabolic process;GO:0006611//protein export from nucleus;GO:0009560//embryo sac egg cell differentiation;GO:0009846//pollen germination;GO:0009555//pollen development;GO:0009165//nu…	GO:0008565//protein transporter activity;GO:0008536//Ran GTPase binding;GO:0004872//receptor activity	GO:0005829//cytosol;GO:0005643//nuclear pore;GO:0009506//plasmodesma
CL1027.Contig12_All	3781	778	6.8738	461	3.8656	228	2.0648	gi|297807725|ref|XP_002871746.1|	1898.2	0	hypothetical protein ARALYDRAFT_909689 [Arabidopsis lyrata subsp. lyrata] >gi|297317583|gb|EFH48005.1| hypothetical protein ARALYDRAFT_909689 [Arabidopsis lyrata subsp. lyrata]	gi|30678763|ref|NM_111181.2|	2886	0	Arabidopsis thaliana exportin 1B mRNA, complete cds	--	--	--	--	SPAC1805.17	932	0	COG5101	Importin beta-related nuclear transport receptor	K14290	0	1898	aly:ARALYDRAFT_909689	exportin-1	GO:0007010//cytoskeleton organization;GO:0006094//gluconeogenesis;GO:0000741//karyogamy;GO:0000059//protein import into nucleus, docking;GO:0000911//cytokinesis by cell plate formation;GO:0010498//proteasomal protein catabolic process;GO:0006611//protein export from nucleus;GO:0009560//embryo sac egg cell differentiation;GO:0009846//pollen germination;GO:0009555//pollen development;GO:0009165//nu…	GO:0008565//protein transporter activity;GO:0008536//Ran GTPase binding;GO:0004872//receptor activity	GO:0005829//cytosol;GO:0005643//nuclear pore;GO:0009506//plasmodesma
CL1027.Contig1_All	3663	0	0	0	0	0	0	gi|567174800|ref|XP_006400241.1|	2010.7	0	hypothetical protein EUTSA_v10012517mg [Eutrema salsugineum] >gi|557101331|gb|ESQ41694.1| hypothetical protein EUTSA_v10012517mg [Eutrema salsugineum]	gi|334187725|ref|NM_001203395.1|	2765	0	Arabidopsis thaliana exportin 1A mRNA, complete cds	--	--	--	--	SPAC1805.17	933	0	COG5101	Importin beta-related nuclear transport receptor	K14290	0	2005	aly:ARALYDRAFT_909689	exportin-1	GO:0007010//cytoskeleton organization;GO:0006094//gluconeogenesis;GO:0000741//karyogamy;GO:0000059//protein import into nucleus, docking;GO:0000911//cytokinesis by cell plate formation;GO:0010498//proteasomal protein catabolic process;GO:0006611//protein export from nucleus;GO:0009560//embryo sac egg cell differentiation;GO:0009846//pollen germination;GO:0009555//pollen development;GO:0009165//nu…	GO:0008565//protein transporter activity;GO:0008536//Ran GTPase binding;GO:0004872//receptor activity	GO:0005829//cytosol;GO:0005643//nuclear pore;GO:0009506//plasmodesma
CL1027.Contig2_All	3793	86	0.7574	76	0.6353	69	0.6229	gi|567174800|ref|XP_006400241.1|	2051.6	0	hypothetical protein EUTSA_v10012517mg [Eutrema salsugineum] >gi|557101331|gb|ESQ41694.1| hypothetical protein EUTSA_v10012517mg [Eutrema salsugineum]	gi|30686166|ref|NM_121708.2|	4343	0	Arabidopsis thaliana exportin 1A mRNA, complete cds	--	--	--	--	SPAC1805.17	936	0	COG5101	Importin beta-related nuclear transport receptor	K14290	0	2046	aly:ARALYDRAFT_909689	exportin-1	GO:0007010//cytoskeleton organization;GO:0006094//gluconeogenesis;GO:0000741//karyogamy;GO:0000059//protein import into nucleus, docking;GO:0000911//cytokinesis by cell plate formation;GO:0010498//proteasomal protein catabolic process;GO:0006611//protein export from nucleus;GO:0009560//embryo sac egg cell differentiation;GO:0009846//pollen germination;GO:0009555//pollen development;GO:0009165//nu…	GO:0008565//protein transporter activity;GO:0008536//Ran GTPase binding;GO:0004872//receptor activity	GO:0005829//cytosol;GO:0005643//nuclear pore;GO:0009506//plasmodesma
CL1027.Contig3_All	5228	225	1.4377	292	1.7708	510	3.3404	gi|565457899|ref|XP_006286949.1|	1971.4	0	hypothetical protein CARUB_v10000095mg [Capsella rubella] >gi|482555655|gb|EOA19847.1| hypothetical protein CARUB_v10000095mg [Capsella rubella]	gi|30686166|ref|NM_121708.2|	3493	0	Arabidopsis thaliana exportin 1A mRNA, complete cds	sp|Q9LFJ8|U78D2_ARATH	737	0	UDP-glycosyltransferase 78D2 OS=Arabidopsis thaliana GN=UGT78D2 PE=2 SV=1	SPAC1805.17	928	0	COG5101	Importin beta-related nuclear transport receptor	K14290	0	1970	aly:ARALYDRAFT_909689	exportin-1	GO:0007010//cytoskeleton organization;GO:0006094//gluconeogenesis;GO:0000741//karyogamy;GO:0000059//protein import into nucleus, docking;GO:0000911//cytokinesis by cell plate formation;GO:0010498//proteasomal protein catabolic process;GO:0006611//protein export from nucleus;GO:0009560//embryo sac egg cell differentiation;GO:0009846//pollen germination;GO:0009555//pollen development;GO:0009165//nu…	GO:0008565//protein transporter activity;GO:0008536//Ran GTPase binding;GO:0004872//receptor activity	GO:0005829//cytosol;GO:0005643//nuclear pore;GO:0009506//plasmodesma
CL1027.Contig4_All	5226	0	0	0	0	0	0	gi|567174800|ref|XP_006400241.1|	2021.9	0	hypothetical protein EUTSA_v10012517mg [Eutrema salsugineum] >gi|557101331|gb|ESQ41694.1| hypothetical protein EUTSA_v10012517mg [Eutrema salsugineum]	gi|334187725|ref|NM_001203395.1|	2859	0	Arabidopsis thaliana exportin 1A mRNA, complete cds	sp|Q9LFJ8|U78D2_ARATH	739	0	UDP-glycosyltransferase 78D2 OS=Arabidopsis thaliana GN=UGT78D2 PE=2 SV=1	SPAC1805.17	940	0	COG5101	Importin beta-related nuclear transport receptor	K14290	0	2018	aly:ARALYDRAFT_909689	exportin-1	GO:0007010//cytoskeleton organization;GO:0006094//gluconeogenesis;GO:0000741//karyogamy;GO:0000059//protein import into nucleus, docking;GO:0000911//cytokinesis by cell plate formation;GO:0010498//proteasomal protein catabolic process;GO:0006611//protein export from nucleus;GO:0009560//embryo sac egg cell differentiation;GO:0009846//pollen germination;GO:0009555//pollen development;GO:0009165//nu…	GO:0008565//protein transporter activity;GO:0008536//Ran GTPase binding;GO:0004872//receptor activity	GO:0005829//cytosol;GO:0005643//nuclear pore;GO:0009506//plasmodesma
CL1027.Contig5_All	3696	0	0	0	0	0	0	gi|567174800|ref|XP_006400241.1|	2039.6	0	hypothetical protein EUTSA_v10012517mg [Eutrema salsugineum] >gi|557101331|gb|ESQ41694.1| hypothetical protein EUTSA_v10012517mg [Eutrema salsugineum]	gi|30686166|ref|NM_121708.2|	4280	0	Arabidopsis thaliana exportin 1A mRNA, complete cds	--	--	--	--	SPAC1805.17	935	0	COG5101	Importin beta-related nuclear transport receptor	K14290	0	2035	aly:ARALYDRAFT_909689	exportin-1	GO:0007010//cytoskeleton organization;GO:0006094//gluconeogenesis;GO:0000741//karyogamy;GO:0000059//protein import into nucleus, docking;GO:0000911//cytokinesis by cell plate formation;GO:0010498//proteasomal protein catabolic process;GO:0006611//protein export from nucleus;GO:0009560//embryo sac egg cell differentiation;GO:0009846//pollen germination;GO:0009555//pollen development;GO:0009165//nu…	GO:0008565//protein transporter activity;GO:0008536//Ran GTPase binding;GO:0004872//receptor activity	GO:0005829//cytosol;GO:0005643//nuclear pore;GO:0009506//plasmodesma
CL1027.Contig6_All	1434	290	6.7557	196	4.3334	155	3.7012	gi|565457899|ref|XP_006286949.1|	851.7	0	hypothetical protein CARUB_v10000095mg [Capsella rubella] >gi|482555655|gb|EOA19847.1| hypothetical protein CARUB_v10000095mg [Capsella rubella]	gi|30686166|ref|NM_121708.2|	1669	0	Arabidopsis thaliana exportin 1A mRNA, complete cds	sp|Q7PC79|XPOT_ARATH	48.9	6e-06	Exportin-T OS=Arabidopsis thaliana GN=PSD PE=2 SV=1	SPAC1805.17	353	2e-111	COG5101	Importin beta-related nuclear transport receptor	K14290	0	850	aly:ARALYDRAFT_909689	exportin-1	GO:0007010//cytoskeleton organization;GO:0006094//gluconeogenesis;GO:0000741//karyogamy;GO:0000059//protein import into nucleus, docking;GO:0000911//cytokinesis by cell plate formation;GO:0010498//proteasomal protein catabolic process;GO:0006611//protein export from nucleus;GO:0009560//embryo sac egg cell differentiation;GO:0009846//pollen germination;GO:0009555//pollen development;GO:0009165//nu…	GO:0008565//protein transporter activity;GO:0008536//Ran GTPase binding;GO:0004872//receptor activity	GO:0005829//cytosol;GO:0005643//nuclear pore;GO:0009506//plasmodesma
CL1027.Contig7_All	5259	0	0	0	0	0	0	gi|567174800|ref|XP_006400241.1|	2050.8	0	hypothetical protein EUTSA_v10012517mg [Eutrema salsugineum] >gi|557101331|gb|ESQ41694.1| hypothetical protein EUTSA_v10012517mg [Eutrema salsugineum]	gi|30686166|ref|NM_121708.2|	4373	0	Arabidopsis thaliana exportin 1A mRNA, complete cds	sp|Q9LFJ8|U78D2_ARATH	739	0	UDP-glycosyltransferase 78D2 OS=Arabidopsis thaliana GN=UGT78D2 PE=2 SV=1	SPAC1805.17	942	0	COG5101	Importin beta-related nuclear transport receptor	K14290	0	2048	aly:ARALYDRAFT_909689	exportin-1	GO:0007010//cytoskeleton organization;GO:0006094//gluconeogenesis;GO:0000741//karyogamy;GO:0000059//protein import into nucleus, docking;GO:0000911//cytokinesis by cell plate formation;GO:0010498//proteasomal protein catabolic process;GO:0006611//protein export from nucleus;GO:0009560//embryo sac egg cell differentiation;GO:0009846//pollen germination;GO:0009555//pollen development;GO:0009165//nu…	GO:0008565//protein transporter activity;GO:0008536//Ran GTPase binding;GO:0004872//receptor activity	GO:0005829//cytosol;GO:0005643//nuclear pore;GO:0009506//plasmodesma
CL1027.Contig8_All	3750	155	1.3808	100	0.8454	57	0.5205	gi|297807725|ref|XP_002871746.1|	2044.2	0	hypothetical protein ARALYDRAFT_909689 [Arabidopsis lyrata subsp. lyrata] >gi|297317583|gb|EFH48005.1| hypothetical protein ARALYDRAFT_909689 [Arabidopsis lyrata subsp. lyrata]	gi|30686166|ref|NM_121708.2|	4272	0	Arabidopsis thaliana exportin 1A mRNA, complete cds	--	--	--	--	SPAC1805.17	938	0	COG5101	Importin beta-related nuclear transport receptor	K14290	0	2044	aly:ARALYDRAFT_909689	exportin-1	GO:0007010//cytoskeleton organization;GO:0006094//gluconeogenesis;GO:0000741//karyogamy;GO:0000059//protein import into nucleus, docking;GO:0000911//cytokinesis by cell plate formation;GO:0010498//proteasomal protein catabolic process;GO:0006611//protein export from nucleus;GO:0009560//embryo sac egg cell differentiation;GO:0009846//pollen germination;GO:0009555//pollen development;GO:0009165//nu…	GO:0008565//protein transporter activity;GO:0008536//Ran GTPase binding;GO:0004872//receptor activity	GO:0005829//cytosol;GO:0005643//nuclear pore;GO:0009506//plasmodesma
CL1027.Contig9_All	3781	0	0	0	0	0	0	gi|565457899|ref|XP_006286949.1|	1974.9	0	hypothetical protein CARUB_v10000095mg [Capsella rubella] >gi|482555655|gb|EOA19847.1| hypothetical protein CARUB_v10000095mg [Capsella rubella]	gi|30686166|ref|NM_121708.2|	3558	0	Arabidopsis thaliana exportin 1A mRNA, complete cds	--	--	--	--	SPAC1805.17	929	0	COG5101	Importin beta-related nuclear transport receptor	K14290	0	1969	aly:ARALYDRAFT_909689	exportin-1	GO:0007010//cytoskeleton organization;GO:0006094//gluconeogenesis;GO:0000741//karyogamy;GO:0000059//protein import into nucleus, docking;GO:0000911//cytokinesis by cell plate formation;GO:0010498//proteasomal protein catabolic process;GO:0006611//protein export from nucleus;GO:0009560//embryo sac egg cell differentiation;GO:0009846//pollen germination;GO:0009555//pollen development;GO:0009165//nu…	GO:0008565//protein transporter activity;GO:0008536//Ran GTPase binding;GO:0004872//receptor activity	GO:0005829//cytosol;GO:0005643//nuclear pore;GO:0009506//plasmodesma
CL1028.Contig1_All	287	25	2.9099	17	1.878	9	1.0738	gi|15229727|ref|NP_190603.1|	127.9	5e-35	uncharacterized protein [Arabidopsis thaliana] >gi|28416689|gb|AAO42875.1| At3g50340 [Arabidopsis thaliana] >gi|332645134|gb|AEE78655.1| uncharacterized protein AT3G50340 [Arabidopsis thaliana]	gi|332640072|gb|CP002686.1|	258	3e-66	Arabidopsis thaliana chromosome 3, complete sequence	--	--	--	--	--	--	--	--	--	--	--	--	--	--	-	-	GO:0005634//nucleus
CL1028.Contig2_All	1440	145	3.3638	76	1.6733	72	1.7121	gi|567188236|ref|XP_006404039.1|	754.2	0	hypothetical protein EUTSA_v10010424mg [Eutrema salsugineum] >gi|557105158|gb|ESQ45492.1| hypothetical protein EUTSA_v10010424mg [Eutrema salsugineum]	gi|332640072|gb|CP002686.1|	1296	0	Arabidopsis thaliana chromosome 3, complete sequence	--	--	--	--	--	--	--	--	--	--	--	--	--	--	-	-	GO:0005634//nucleus
CL1028.Contig3_All	1454	174	3.9977	85	1.8534	49	1.154	gi|15229727|ref|NP_190603.1|	738.8	0	uncharacterized protein [Arabidopsis thaliana] >gi|28416689|gb|AAO42875.1| At3g50340 [Arabidopsis thaliana] >gi|332645134|gb|AEE78655.1| uncharacterized protein AT3G50340 [Arabidopsis thaliana]	gi|332640072|gb|CP002686.1|	1243	0	Arabidopsis thaliana chromosome 3, complete sequence	--	--	--	--	--	--	--	--	--	--	--	--	--	--	-	-	GO:0005634//nucleus
CL1029.Contig1_All	2799	2600	31.031	1395	15.8012	452	5.5296	gi|565469986|ref|XP_006292796.1|	1032.7	0	hypothetical protein CARUB_v10019047mg [Capsella rubella] >gi|482561503|gb|EOA25694.1| hypothetical protein CARUB_v10019047mg [Capsella rubella]	gi|145339288|ref|NM_114809.3|	628	1e-177	Arabidopsis thaliana uncharacterized protein mRNA, complete cds	--	--	--	--	--	--	--	--	--	--	--	--	--	--	GO:0010413//glucuronoxylan metabolic process;GO:0016558//protein import into peroxisome matrix;GO:0006635//fatty acid beta-oxidation;GO:0045492//xylan biosynthetic process;GO:0006487//protein N-linked glycosylation	-	GO:0005634//nucleus
CL1029.Contig2_All	669	85	4.2444	80	3.7912	56	2.8663	gi|565469986|ref|XP_006292796.1|	227.3	3e-67	hypothetical protein CARUB_v10019047mg [Capsella rubella] >gi|482561503|gb|EOA25694.1| hypothetical protein CARUB_v10019047mg [Capsella rubella]	gi|332640072|gb|CP002686.1|	119	5e-24	Arabidopsis thaliana chromosome 3, complete sequence	--	--	--	--	--	--	--	--	--	--	--	--	--	--	GO:0010413//glucuronoxylan metabolic process;GO:0016558//protein import into peroxisome matrix;GO:0006635//fatty acid beta-oxidation;GO:0045492//xylan biosynthetic process;GO:0006487//protein N-linked glycosylation	-	-
CL1029.Contig3_All	1519	315	6.9275	166	3.4647	43	0.9693	gi|565469986|ref|XP_006292796.1|	528.1	2e-177	hypothetical protein CARUB_v10019047mg [Capsella rubella] >gi|482561503|gb|EOA25694.1| hypothetical protein CARUB_v10019047mg [Capsella rubella]	gi|332640072|gb|CP002686.1|	182	8e-43	Arabidopsis thaliana chromosome 3, complete sequence	--	--	--	--	SPBC28F2.12	53.1	1e-06	COG0086	DNA-directed RNA polymerase, beta' subunit/160 kD subunit	--	--	--	--	--	GO:0010413//glucuronoxylan metabolic process;GO:0016558//protein import into peroxisome matrix;GO:0006635//fatty acid beta-oxidation;GO:0045492//xylan biosynthetic process;GO:0006487//protein N-linked glycosylation	-	-
CL1029.Contig4_All	2808	392	4.6635	240	2.7098	87	1.0609	gi|565469986|ref|XP_006292796.1|	1033.5	0	hypothetical protein CARUB_v10019047mg [Capsella rubella] >gi|482561503|gb|EOA25694.1| hypothetical protein CARUB_v10019047mg [Capsella rubella]	gi|145339288|ref|NM_114809.3|	565	1e-157	Arabidopsis thaliana uncharacterized protein mRNA, complete cds	--	--	--	--	--	--	--	--	--	--	--	--	--	--	GO:0010413//glucuronoxylan metabolic process;GO:0016558//protein import into peroxisome matrix;GO:0006635//fatty acid beta-oxidation;GO:0045492//xylan biosynthetic process;GO:0006487//protein N-linked glycosylation	-	-
CL1029.Contig5_All	2820	449	5.3189	300	3.3728	50	0.6071	gi|565469986|ref|XP_006292796.1|	1018.8	0	hypothetical protein CARUB_v10019047mg [Capsella rubella] >gi|482561503|gb|EOA25694.1| hypothetical protein CARUB_v10019047mg [Capsella rubella]	gi|145339288|ref|NM_114809.3|	555	1e-154	Arabidopsis thaliana uncharacterized protein mRNA, complete cds	--	--	--	--	--	--	--	--	--	--	--	--	--	--	GO:0010413//glucuronoxylan metabolic process;GO:0016558//protein import into peroxisome matrix;GO:0006635//fatty acid beta-oxidation;GO:0045492//xylan biosynthetic process;GO:0006487//protein N-linked glycosylation	-	-
CL103.Contig1_All	457	30	2.193	81	5.6194	7	0.5245	gi|1708577|sp|P26780.2|DEF2_SINAL	189.9	9e-62	RecName: Full=Defensin-like protein 2; AltName: Full=MTI-2; AltName: Full=Trypsin inhibitor 2; Flags: Precursor >gi|1054853|emb|CAA58994.1| trypsin inhibitor 2 [Sinapis alba] >gi|2791356|emb|CAA76116.1| trypsin inhibitor 2 [Sinapis alba]	gi|2791355|emb|Y16190.1|	490	1e-136	Sinapsis alba mRNA for trypsin inhibitor 2	sp|P26780|DEF2_SINAL	189	1e-63	Defensin-like protein 2 OS=Sinapis alba PE=1 SV=2	--	--	--	--	--	--	--	--	--	--	GO:0050832//defense response to fungus	GO:0004867//serine-type endopeptidase inhibitor activity;GO:0008200//ion channel inhibitor activity	GO:0005576//extracellular region
CL103.Contig2_All	509	5242	344.036	369	22.9841	144	9.6873	gi|85539361|emb|CAJ44305.1|	183	7e-59	rapeseed putative trypsin inhibitor 1 [Brassica napus]	gi|145360950|ref|NM_129912.3|	252	4e-64	Arabidopsis thaliana trypsin inhibitor protein 1 mRNA, complete cds	sp|Q42328|DF195_ARATH	163	4e-53	Defensin-like protein 195 OS=Arabidopsis thaliana GN=ATTI1 PE=1 SV=3	--	--	--	--	--	--	--	--	--	--	GO:0050832//defense response to fungus	GO:0004867//serine-type endopeptidase inhibitor activity;GO:0008200//ion channel inhibitor activity	GO:0005576//extracellular region
CL1030.Contig1_All	656	13	0.662	121	5.8479	57	2.9753	gi|565434815|ref|XP_006281083.1|	370.5	2e-130	hypothetical protein CARUB_v10027113mg [Capsella rubella] >gi|482549787|gb|EOA13981.1| hypothetical protein CARUB_v10027113mg [Capsella rubella]	gi|145359502|ref|NM_125479.3|	700	0	Arabidopsis thaliana RAB GTPase homolog A1F mRNA, complete cds	sp|Q9FJH0|RAA1F_ARATH	369	1e-131	Ras-related protein RABA1f OS=Arabidopsis thaliana GN=RABA1F PE=2 SV=1	SPAC18G6.03	253	2e-85	COG1100	GTPase SAR1 and related small G proteins	K07976	3e-131	369	aly:ARALYDRAFT_919325	Rab family, other	GO:0046686//response to cadmium ion;GO:0016192//vesicle-mediated transport;GO:0008152//metabolic process;GO:0007264//small GTPase mediated signal transduction;GO:0015031//protein transport	GO:0005525//GTP binding;GO:0016787//hydrolase activity	GO:0005829//cytosol
CL1030.Contig2_All	840	464	18.4528	372	14.0405	176	7.1745	gi|565481768|ref|XP_006298524.1|	390.6	3e-137	hypothetical protein CARUB_v10014602mg [Capsella rubella] >gi|482567233|gb|EOA31422.1| hypothetical protein CARUB_v10014602mg [Capsella rubella]	gi|145338522|ref|NM_112368.3|	617	1e-174	Arabidopsis thaliana RAB GTPase-like protein A1G mRNA, complete cds	sp|Q9LK99|RAA1G_ARATH	389	1e-138	Ras-related protein RABA1g OS=Arabidopsis thaliana GN=RABA1G PE=2 SV=1	SPAC18G6.03	268	2e-90	COG1100	GTPase SAR1 and related small G proteins	K07976	4e-138	389	ath:AT3G15060	Rab family, other	GO:0046686//response to cadmium ion;GO:0016192//vesicle-mediated transport;GO:0008152//metabolic process;GO:0007264//small GTPase mediated signal transduction;GO:0015031//protein transport	GO:0005525//GTP binding;GO:0016787//hydrolase activity	GO:0005829//cytosol
CL1031.Contig1_All	4626	761	5.4955	1968	13.4877	720	5.3295	gi|567153187|ref|XP_006417419.1|	2548.1	0	hypothetical protein EUTSA_v10006565mg [Eutrema salsugineum] >gi|557095190|gb|ESQ35772.1| hypothetical protein EUTSA_v10006565mg [Eutrema salsugineum]	gi|334182442|ref|NM_100952.4|	5477	0	Arabidopsis thaliana alpha-glucan water dikinase 1 mRNA, complete cds	sp|Q9SAC6|GWD1_ARATH	2484	0	Alpha-glucan water dikinase 1, chloroplastic OS=Arabidopsis thaliana GN=GWD1 PE=1 SV=2	MJ0542_1	83.6	6e-16	COG0574	Phosphoenolpyruvate synthase/pyruvate phosphate dikinase	K08244	0	2484	ath:AT1G10760	alpha-glucan, water dikinase [EC:2.7.9.4]	GO:0018106//peptidyl-histidine phosphorylation;GO:0009610//response to symbiotic fungus;GO:0005983//starch catabolic process;GO:0007623//circadian rhythm;GO:0009631//cold acclimation;GO:0019252//starch biosynthetic process	GO:0004673//protein histidine kinase activity;GO:0046872//metal ion binding;GO:0005524//ATP binding;GO:0050521//alpha-glucan, water dikinase activity;GO:0005515//protein binding	GO:0005739//mitochondrion;GO:0009941//chloroplast envelope;GO:0009570//chloroplast stroma
CL1031.Contig2_All	4577	927	6.7659	1105	7.6542	2386	17.8504	gi|567153187|ref|XP_006417419.1|	2552.7	0	hypothetical protein EUTSA_v10006565mg [Eutrema salsugineum] >gi|557095190|gb|ESQ35772.1| hypothetical protein EUTSA_v10006565mg [Eutrema salsugineum]	gi|334182442|ref|NM_100952.4|	5612	0	Arabidopsis thaliana alpha-glucan water dikinase 1 mRNA, complete cds	sp|Q9SAC6|GWD1_ARATH	2489	0	Alpha-glucan water dikinase 1, chloroplastic OS=Arabidopsis thaliana GN=GWD1 PE=1 SV=2	MJ0542_1	85.1	2e-16	COG0574	Phosphoenolpyruvate synthase/pyruvate phosphate dikinase	K08244	0	2489	ath:AT1G10760	alpha-glucan, water dikinase [EC:2.7.9.4]	GO:0018106//peptidyl-histidine phosphorylation;GO:0009610//response to symbiotic fungus;GO:0005983//starch catabolic process;GO:0007623//circadian rhythm;GO:0009631//cold acclimation;GO:0019252//starch biosynthetic process	GO:0004673//protein histidine kinase activity;GO:0005524//ATP binding;GO:0050521//alpha-glucan, water dikinase activity;GO:0005515//protein binding	GO:0005739//mitochondrion;GO:0009941//chloroplast envelope;GO:0009570//chloroplast stroma
CL1032.Contig1_All	884	551	20.8221	993	35.6135	1022	39.5874	gi|565474906|ref|XP_006295094.1|	263.8	1e-87	hypothetical protein CARUB_v10024168mg [Capsella rubella] >gi|482563802|gb|EOA27992.1| hypothetical protein CARUB_v10024168mg [Capsella rubella]	gi|79561826|ref|NM_128000.3|	367	2e-98	Arabidopsis thaliana AIG2-like family protein mRNA, complete cds	sp|Q9FIX2|AIG2L_ARATH	152	7e-46	AIG2-like protein OS=Arabidopsis thaliana GN=At5g39720 PE=1 SV=1	--	--	--	--	--	--	--	--	--	--	-	-	GO:0005634//nucleus
CL1032.Contig2_All	433	4	0.3086	0	0	1	0.0791	gi|334184412|ref|NP_001189591.1|	102.4	8e-27	AIG2-like family protein [Arabidopsis thaliana] >gi|330252476|gb|AEC07570.1| AIG2-like family protein [Arabidopsis thaliana]	gi|334184411|ref|NM_001202662.1|	155	5e-35	Arabidopsis thaliana AIG2-like family protein mRNA, complete cds	sp|P54121|AIG2_ARATH	68.6	3e-15	Protein AIG2 OS=Arabidopsis thaliana GN=AIG2 PE=2 SV=1	--	--	--	--	--	--	--	--	--	--	GO:0050896//response to stimulus	-	GO:0044444//cytoplasmic part;GO:0005634//nucleus
CL1033.Contig1_All	2794	51	0.6098	50	0.5674	29	0.3554	gi|567219060|ref|XP_006413159.1|	67.8	1e-09	hypothetical protein EUTSA_v10024474mg [Eutrema salsugineum] >gi|557114329|gb|ESQ54612.1| hypothetical protein EUTSA_v10024474mg [Eutrema salsugineum]	gi|145345477|ref|NM_118797.4|	1068	0	Arabidopsis thaliana DEK domain-containing chromatin associated protein mRNA, complete cds	sp|Q9MEF2|YCF2_OENEH	90.5	4e-18	Protein ycf2 OS=Oenothera elata subsp. hookeri GN=ycf2-A PE=3 SV=2	YLR106c	93.6	2e-18	COG5271	AAA ATPase containing von Willebrand factor type A (vWA) domain	K15400	1e-105	353	vvi:100245819	omega-hydroxypalmitate O-feruloyl transferase [EC:2.3.1.188]	-	GO:0003677//DNA binding	GO:0005829//cytosol;GO:0005739//mitochondrion;GO:0005634//nucleus
CL1033.Contig2_All	2810	45	0.535	82	0.9252	56	0.6824	gi|567219060|ref|XP_006413159.1|	67.8	1e-09	hypothetical protein EUTSA_v10024474mg [Eutrema salsugineum] >gi|557114329|gb|ESQ54612.1| hypothetical protein EUTSA_v10024474mg [Eutrema salsugineum]	gi|145345477|ref|NM_118797.4|	1068	0	Arabidopsis thaliana DEK domain-containing chromatin associated protein mRNA, complete cds	sp|Q9MEF2|YCF2_OENEH	90.5	4e-18	Protein ycf2 OS=Oenothera elata subsp. hookeri GN=ycf2-A PE=3 SV=2	YLR106c	93.6	2e-18	COG5271	AAA ATPase containing von Willebrand factor type A (vWA) domain	K15400	1e-105	353	vvi:100245819	omega-hydroxypalmitate O-feruloyl transferase [EC:2.3.1.188]	-	GO:0003677//DNA binding	GO:0005829//cytosol;GO:0005739//mitochondrion;GO:0005634//nucleus
CL1033.Contig3_All	375	0	0	0	0	1	0.0913	--	--	--	--	gi|199580283|gb|AC189587.2|	176	1e-41	Brassica rapa subsp. pekinensis clone KBrH012K23, complete sequence	--	--	--	--	--	--	--	--	--	--	--	--	--	--	-	-	-
CL1033.Contig4_All	392	2	0.1704	4	0.3235	6	0.5241	--	--	--	--	gi|332656411|gb|CP002687.1|	151	7e-34	Arabidopsis thaliana chromosome 4, complete genome	--	--	--	--	--	--	--	--	--	--	--	--	--	--	-	-	-
CL1033.Contig5_All	398	0	0	0	0	0	0	--	--	--	--	gi|332656411|gb|CP002687.1|	151	8e-34	Arabidopsis thaliana chromosome 4, complete genome	--	--	--	--	--	--	--	--	--	--	--	--	--	--	-	-	-
CL1034.Contig1_All	1004	135	4.4918	108	3.4104	29	0.9891	gi|565439155|ref|XP_006282443.1|	596.3	0	hypothetical protein CARUB_v10004114mg [Capsella rubella] >gi|482551148|gb|EOA15341.1| hypothetical protein CARUB_v10004114mg [Capsella rubella]	gi|186511774|ref|NM_117510.4|	1021	0	Arabidopsis thaliana phragmoplast-associated kinesin-related protein 2 mRNA, complete cds	sp|Q07970|ATK1_ARATH	101	2e-23	Kinesin-1 OS=Arabidopsis thaliana GN=ATK1 PE=2 SV=1	SPAC1834.07	90.1	3e-19	COG5059	Kinesin-like protein	K10405	2e-23	102	smo:SELMODRAFT_78306	kinesin family member C1	GO:0000226//microtubule cytoskeleton organization;GO:0006346//methylation-dependent chromatin silencing;GO:0031048//chromatin silencing by small RNA;GO:0000911//cytokinesis by cell plate formation;GO:0051567//histone H3-K9 methylation;GO:0048453//sepal formation;GO:0048451//petal formation;GO:0009909//regulation of flower development;GO:0007018//microtubule-based movement	GO:0003777//microtubule motor activity;GO:0008017//microtubule binding;GO:0005524//ATP binding	GO:0009524//phragmoplast;GO:0005874//microtubule;GO:0005871//kinesin complex
CL1035.Contig1_All	1734	3988	76.83	3152	57.6309	1330	26.264	gi|334186242|ref|NP_001190642.1|	711.4	0	fringe-related protein [Arabidopsis thaliana] >gi|332656452|gb|AEE81852.1| fringe-related protein [Arabidopsis thaliana]	gi|334186241|ref|NM_001203713.1|	416	1e-113	Arabidopsis thaliana fringe-related protein mRNA, complete cds	sp|Q9FLW0|Y5241_ARATH	278	1e-83	Probable receptor-like protein kinase At5g24010 OS=Arabidopsis thaliana GN=At5g24010 PE=1 SV=1	--	--	--	--	--	K04733	1e-35	144	ath:AT5G38990	interleukin-1 receptor-associated kinase 4 [EC:2.7.11.1]	-	GO:0016757//transferase activity, transferring glycosyl groups	GO:0005576//extracellular region;GO:0005783//endoplasmic reticulum;GO:0005634//nucleus
CL1035.Contig2_All	1716	2047	39.8497	1658	30.6327	637	12.711	gi|334186242|ref|NP_001190642.1|	681	0	fringe-related protein [Arabidopsis thaliana] >gi|332656452|gb|AEE81852.1| fringe-related protein [Arabidopsis thaliana]	gi|334186241|ref|NM_001203713.1|	595	1e-167	Arabidopsis thaliana fringe-related protein mRNA, complete cds	sp|Q9FLW0|Y5241_ARATH	256	2e-75	Probable receptor-like protein kinase At5g24010 OS=Arabidopsis thaliana GN=At5g24010 PE=1 SV=1	--	--	--	--	--	K04733	3e-37	149	ath:AT5G38990	interleukin-1 receptor-associated kinase 4 [EC:2.7.11.1]	-	GO:0016757//transferase activity, transferring glycosyl groups	GO:0005576//extracellular region;GO:0005783//endoplasmic reticulum;GO:0005634//nucleus
CL1036.Contig1_All	377	84	7.4432	160	13.4554	42	3.8148	gi|18409825|ref|NP_566985.1|	141.4	2e-43	DNA-binding protein S1FA1 [Arabidopsis thaliana] >gi|21264516|sp|P42551.2|S1FA1_ARATH RecName: Full=DNA-binding protein S1FA1 >gi|21618102|gb|AAM67152.1| DNA binding protein S1FA [Arabidopsis thaliana] >gi|332645555|gb|AEE79076.1| DNA-binding protein S1FA1 [Arabidopsis thaliana]	gi|42565891|ref|NM_115197.2|	313	8e-83	Arabidopsis thaliana DNA-binding protein S1FA1 mRNA, complete cds	sp|P42551|S1FA1_ARATH	141	4e-45	DNA-binding protein S1FA1 OS=Arabidopsis thaliana GN=S1FA1 PE=2 SV=2	--	--	--	--	--	--	--	--	--	--	GO:0006355//regulation of transcription, DNA-dependent	GO:0003677//DNA binding	GO:0005634//nucleus
CL1036.Contig2_All	373	42	3.7615	46	3.9099	25	2.295	gi|18409825|ref|NP_566985.1|	141.4	2e-43	DNA-binding protein S1FA1 [Arabidopsis thaliana] >gi|21264516|sp|P42551.2|S1FA1_ARATH RecName: Full=DNA-binding protein S1FA1 >gi|21618102|gb|AAM67152.1| DNA binding protein S1FA [Arabidopsis thaliana] >gi|332645555|gb|AEE79076.1| DNA-binding protein S1FA1 [Arabidopsis thaliana]	gi|42565891|ref|NM_115197.2|	313	8e-83	Arabidopsis thaliana DNA-binding protein S1FA1 mRNA, complete cds	sp|P42551|S1FA1_ARATH	141	4e-45	DNA-binding protein S1FA1 OS=Arabidopsis thaliana GN=S1FA1 PE=2 SV=2	--	--	--	--	--	--	--	--	--	--	GO:0006355//regulation of transcription, DNA-dependent	GO:0003677//DNA binding	GO:0005634//nucleus
CL1037.Contig1_All	1319	23	0.5825	3	0.0721	6	0.1558	gi|567213644|ref|XP_006410933.1|	649.8	0	hypothetical protein EUTSA_v10016799mg [Eutrema salsugineum] >gi|557112102|gb|ESQ52386.1| hypothetical protein EUTSA_v10016799mg [Eutrema salsugineum]	gi|240254597|ref|NM_129301.5|	876	0	Arabidopsis thaliana nodulin MtN21-like transporter family protein mRNA, complete cds	sp|Q9ZUS1|WTR13_ARATH	649	0	WAT1-related protein At2g37460 OS=Arabidopsis thaliana GN=At2g37460 PE=2 SV=1	AF0510	53.1	4e-07	COG0697	Permeases of the drug/metabolite transporter (DMT) superfamily	--	--	--	--	--	GO:0019761//glucosinolate biosynthetic process;GO:0006810//transport;GO:0016556//mRNA modification	-	GO:0005737//cytoplasm;GO:0016021//integral to membrane
CL1037.Contig2_All	1552	3803	81.8576	2089	42.6742	1135	25.0416	gi|567213644|ref|XP_006410933.1|	686.4	0	hypothetical protein EUTSA_v10016799mg [Eutrema salsugineum] >gi|557112102|gb|ESQ52386.1| hypothetical protein EUTSA_v10016799mg [Eutrema salsugineum]	gi|240254597|ref|NM_129301.5|	1172	0	Arabidopsis thaliana nodulin MtN21-like transporter family protein mRNA, complete cds	sp|Q9ZUS1|WTR13_ARATH	682	0	WAT1-related protein At2g37460 OS=Arabidopsis thaliana GN=At2g37460 PE=2 SV=1	AF0510	62.4	4e-10	COG0697	Permeases of the drug/metabolite transporter (DMT) superfamily	--	--	--	--	--	GO:0019761//glucosinolate biosynthetic process;GO:0016556//mRNA modification	-	GO:0005737//cytoplasm;GO:0016020//membrane
CL1037.Contig3_All	554	103	6.2109	124	7.0963	1	0.0618	gi|15224291|ref|NP_181282.1|	140.6	1e-38	nodulin MtN21-like transporter family protein [Arabidopsis thaliana] >gi|75216840|sp|Q9ZUS1.1|WTR13_ARATH RecName: Full=WAT1-related protein At2g37460 >gi|4056506|gb|AAC98072.1| nodulin-like protein [Arabidopsis thaliana] >gi|14994253|gb|AAK73261.1| nodulin-like protein [Arabidopsis thaliana] >gi|330254309|gb|AEC09403.1| nodulin MtN21-like transporter family protein [Arabidopsis thaliana]	gi|240254597|ref|NM_129301.5|	220	1e-54	Arabidopsis thaliana nodulin MtN21-like transporter family protein mRNA, complete cds	sp|Q9ZUS1|WTR13_ARATH	140	2e-40	WAT1-related protein At2g37460 OS=Arabidopsis thaliana GN=At2g37460 PE=2 SV=1	--	--	--	--	--	--	--	--	--	--	GO:0019761//glucosinolate biosynthetic process;GO:0016556//mRNA modification	-	GO:0005737//cytoplasm;GO:0016020//membrane
CL1037.Contig4_All	1382	238	5.753	2	0.0459	21	0.5203	gi|567213644|ref|XP_006410933.1|	699.9	0	hypothetical protein EUTSA_v10016799mg [Eutrema salsugineum] >gi|557112102|gb|ESQ52386.1| hypothetical protein EUTSA_v10016799mg [Eutrema salsugineum]	gi|240254597|ref|NM_129301.5|	1239	0	Arabidopsis thaliana nodulin MtN21-like transporter family protein mRNA, complete cds	sp|Q9ZUS1|WTR13_ARATH	699	0	WAT1-related protein At2g37460 OS=Arabidopsis thaliana GN=At2g37460 PE=2 SV=1	AF0510	57.8	1e-08	COG0697	Permeases of the drug/metabolite transporter (DMT) superfamily	--	--	--	--	--	GO:0019761//glucosinolate biosynthetic process;GO:0016556//mRNA modification	-	GO:0005737//cytoplasm;GO:0016020//membrane
CL1037.Contig5_All	1569	772	16.4369	42	0.8487	21	0.4583	gi|567213644|ref|XP_006410933.1|	615.9	0	hypothetical protein EUTSA_v10016799mg [Eutrema salsugineum] >gi|557112102|gb|ESQ52386.1| hypothetical protein EUTSA_v10016799mg [Eutrema salsugineum]	gi|240254597|ref|NM_129301.5|	785	0	Arabidopsis thaliana nodulin MtN21-like transporter family protein mRNA, complete cds	sp|Q9ZUS1|WTR13_ARATH	610	0	WAT1-related protein At2g37460 OS=Arabidopsis thaliana GN=At2g37460 PE=2 SV=1	AF0510	65.1	6e-11	COG0697	Permeases of the drug/metabolite transporter (DMT) superfamily	--	--	--	--	--	GO:0019761//glucosinolate biosynthetic process;GO:0016556//mRNA modification	-	GO:0005737//cytoplasm;GO:0016020//membrane
CL1038.Contig10_All	1107	0	0	0	0	0	0	gi|565435913|ref|XP_006281440.1|	189.1	6e-131	hypothetical protein CARUB_v10027516mg [Capsella rubella] >gi|482550144|gb|EOA14338.1| hypothetical protein CARUB_v10027516mg [Capsella rubella]	gi|145362669|ref|NM_203155.2|	521	1e-145	Arabidopsis thaliana haloacid dehalogenase-like hydrolase domain-containing protein mRNA, complete cds	--	--	--	--	alr4095	54.7	4e-17	COG1011	Predicted hydrolase (HAD superfamily)	--	--	--	--	--	GO:0008152//metabolic process	GO:0016787//hydrolase activity	-
CL1038.Contig11_All	1088	0	0	0	0	0	0	gi|565435913|ref|XP_006281440.1|	189.1	6e-131	hypothetical protein CARUB_v10027516mg [Capsella rubella] >gi|482550144|gb|EOA14338.1| hypothetical protein CARUB_v10027516mg [Capsella rubella]	gi|145362669|ref|NM_203155.2|	521	1e-145	Arabidopsis thaliana haloacid dehalogenase-like hydrolase domain-containing protein mRNA, complete cds	--	--	--	--	alr4095	54.7	4e-17	COG1011	Predicted hydrolase (HAD superfamily)	--	--	--	--	--	GO:0008152//metabolic process	GO:0016787//hydrolase activity	-
CL1038.Contig12_All	1093	0	0	0	0	0	0	gi|565435913|ref|XP_006281440.1|	168.7	4e-131	hypothetical protein CARUB_v10027516mg [Capsella rubella] >gi|482550144|gb|EOA14338.1| hypothetical protein CARUB_v10027516mg [Capsella rubella]	gi|145362669|ref|NM_203155.2|	597	1e-167	Arabidopsis thaliana haloacid dehalogenase-like hydrolase domain-containing protein mRNA, complete cds	--	--	--	--	alr4095	72.8	3e-14	COG1011	Predicted hydrolase (HAD superfamily)	--	--	--	--	--	GO:0008152//metabolic process	GO:0016787//hydrolase activity	-
CL1038.Contig1_All	1022	19	0.6211	22	0.6825	12	0.4021	gi|565435913|ref|XP_006281440.1|	487.6	5e-174	hypothetical protein CARUB_v10027516mg [Capsella rubella] >gi|482550144|gb|EOA14338.1| hypothetical protein CARUB_v10027516mg [Capsella rubella]	gi|145362669|ref|NM_203155.2|	884	0	Arabidopsis thaliana haloacid dehalogenase-like hydrolase domain-containing protein mRNA, complete cds	--	--	--	--	alr4095	94.4	4e-22	COG1011	Predicted hydrolase (HAD superfamily)	--	--	--	--	--	GO:0008152//metabolic process	GO:0016787//hydrolase activity	-
CL1038.Contig2_All	1035	0	0	0	0	0	0	gi|565435913|ref|XP_006281440.1|	189.1	1e-131	hypothetical protein CARUB_v10027516mg [Capsella rubella] >gi|482550144|gb|EOA14338.1| hypothetical protein CARUB_v10027516mg [Capsella rubella]	gi|145362669|ref|NM_203155.2|	553	1e-154	Arabidopsis thaliana haloacid dehalogenase-like hydrolase domain-containing protein mRNA, complete cds	--	--	--	--	alr4095	54.7	4e-17	COG1011	Predicted hydrolase (HAD superfamily)	--	--	--	--	--	GO:0008152//metabolic process	GO:0016787//hydrolase activity	-
CL1038.Contig3_All	1021	0	0	0	0	0	0	gi|565435913|ref|XP_006281440.1|	170.2	1e-131	hypothetical protein CARUB_v10027516mg [Capsella rubella] >gi|482550144|gb|EOA14338.1| hypothetical protein CARUB_v10027516mg [Capsella rubella]	gi|145362669|ref|NM_203155.2|	597	1e-167	Arabidopsis thaliana haloacid dehalogenase-like hydrolase domain-containing protein mRNA, complete cds	--	--	--	--	alr4095	72.8	2e-14	COG1011	Predicted hydrolase (HAD superfamily)	--	--	--	--	--	GO:0008152//metabolic process	GO:0016787//hydrolase activity	-
CL1038.Contig4_All	730	0	0	0	0	0	0	gi|567167480|ref|XP_006398102.1|	23.1	2e-78	hypothetical protein EUTSA_v10001002mg [Eutrema salsugineum] >gi|557099191|gb|ESQ39555.1| hypothetical protein EUTSA_v10001002mg [Eutrema salsugineum]	gi|332002898|gb|CP002688.1|	337	1e-89	Arabidopsis thaliana chromosome 5, complete sequence	--	--	--	--	--	--	--	--	--	--	--	--	--	--	GO:0008152//metabolic process	GO:0016787//hydrolase activity	-
CL1038.Contig5_All	955	1	0.035	2	0.0664	0	0	gi|565435913|ref|XP_006281440.1|	489.2	5e-175	hypothetical protein CARUB_v10027516mg [Capsella rubella] >gi|482550144|gb|EOA14338.1| hypothetical protein CARUB_v10027516mg [Capsella rubella]	gi|145362669|ref|NM_203155.2|	916	0	Arabidopsis thaliana haloacid dehalogenase-like hydrolase domain-containing protein mRNA, complete cds	--	--	--	--	alr4095	94.4	2e-22	COG1011	Predicted hydrolase (HAD superfamily)	--	--	--	--	--	GO:0008152//metabolic process	GO:0016787//hydrolase activity	-
CL1038.Contig6_All	1003	0	0	0	0	0	0	gi|565435913|ref|XP_006281440.1|	487.6	4e-174	hypothetical protein CARUB_v10027516mg [Capsella rubella] >gi|482550144|gb|EOA14338.1| hypothetical protein CARUB_v10027516mg [Capsella rubella]	gi|145362669|ref|NM_203155.2|	884	0	Arabidopsis thaliana haloacid dehalogenase-like hydrolase domain-containing protein mRNA, complete cds	--	--	--	--	alr4095	94.4	3e-22	COG1011	Predicted hydrolase (HAD superfamily)	--	--	--	--	--	GO:0008152//metabolic process	GO:0016787//hydrolase activity	-
CL1038.Contig7_All	1178	0	0	0	0	0	0	gi|565435913|ref|XP_006281440.1|	140.2	6e-126	hypothetical protein CARUB_v10027516mg [Capsella rubella] >gi|482550144|gb|EOA14338.1| hypothetical protein CARUB_v10027516mg [Capsella rubella]	gi|332002898|gb|CP002688.1|	379	1e-102	Arabidopsis thaliana chromosome 5, complete sequence	--	--	--	--	alr4095	53.1	2e-07	COG1011	Predicted hydrolase (HAD superfamily)	--	--	--	--	--	GO:0008152//metabolic process	GO:0016787//hydrolase activity	-
CL1038.Contig8_All	1159	0	0	0	0	0	0	gi|565435913|ref|XP_006281440.1|	140.2	6e-126	hypothetical protein CARUB_v10027516mg [Capsella rubella] >gi|482550144|gb|EOA14338.1| hypothetical protein CARUB_v10027516mg [Capsella rubella]	gi|332002898|gb|CP002688.1|	379	1e-102	Arabidopsis thaliana chromosome 5, complete sequence	--	--	--	--	alr4095	53.1	2e-07	COG1011	Predicted hydrolase (HAD superfamily)	--	--	--	--	--	GO:0008152//metabolic process	GO:0016787//hydrolase activity	-
CL1038.Contig9_All	1074	0	0	0	0	0	0	gi|565435913|ref|XP_006281440.1|	168.7	4e-131	hypothetical protein CARUB_v10027516mg [Capsella rubella] >gi|482550144|gb|EOA14338.1| hypothetical protein CARUB_v10027516mg [Capsella rubella]	gi|145362669|ref|NM_203155.2|	597	1e-167	Arabidopsis thaliana haloacid dehalogenase-like hydrolase domain-containing protein mRNA, complete cds	--	--	--	--	alr4095	72.8	2e-14	COG1011	Predicted hydrolase (HAD superfamily)	--	--	--	--	--	GO:0008152//metabolic process	GO:0016787//hydrolase activity	-
CL1039.Contig1_All	1008	188	6.2305	129	4.0574	65	2.2081	gi|567202421|ref|XP_006407964.1|	547.7	0	hypothetical protein EUTSA_v10019892mg [Eutrema salsugineum] >gi|557109110|gb|ESQ49417.1| hypothetical protein EUTSA_v10019892mg [Eutrema salsugineum]	gi|145338180|ref|NM_111504.3|	969	0	Arabidopsis thaliana SAC3/GANP/Nin1/mts3/eIF-3 p25 family protein mRNA, complete cds	--	--	--	--	--	--	--	--	--	K11323	7e-06	48.9	vcn:VOLCADRAFT_121342	histone arginine demethylase JMJD6 [EC:1.14.11.-]	-	-	GO:0034399//nuclear periphery
CL1039.Contig2_All	5084	324	2.1289	208	1.2971	101	0.6803	gi|297833372|ref|XP_002884568.1|	2545.8	0	hypothetical protein ARALYDRAFT_477928 [Arabidopsis lyrata subsp. lyrata] >gi|297330408|gb|EFH60827.1| hypothetical protein ARALYDRAFT_477928 [Arabidopsis lyrata subsp. lyrata]	gi|145338180|ref|NM_111504.3|	2115	0	Arabidopsis thaliana SAC3/GANP/Nin1/mts3/eIF-3 p25 family protein mRNA, complete cds	sp|P13983|EXTN_TOBAC	51.6	4e-06	Extensin OS=Nicotiana tabacum GN=HRGPNT3 PE=2 SV=1	SPCC576.05	126	2e-28	COG5079	Nuclear protein export factor	K13095	7e-06	52.4	aly:ARALYDRAFT_475645	splicing factor 1	-	-	GO:0034399//nuclear periphery
CL1039.Contig3_All	5006	895	5.9725	492	3.116	282	1.9289	gi|297833372|ref|XP_002884568.1|	2628.2	0	hypothetical protein ARALYDRAFT_477928 [Arabidopsis lyrata subsp. lyrata] >gi|297330408|gb|EFH60827.1| hypothetical protein ARALYDRAFT_477928 [Arabidopsis lyrata subsp. lyrata]	gi|145338180|ref|NM_111504.3|	3780	0	Arabidopsis thaliana SAC3/GANP/Nin1/mts3/eIF-3 p25 family protein mRNA, complete cds	sp|P13983|EXTN_TOBAC	51.6	4e-06	Extensin OS=Nicotiana tabacum GN=HRGPNT3 PE=2 SV=1	SPCC576.05	127	7e-29	COG5079	Nuclear protein export factor	K13095	7e-06	52.4	aly:ARALYDRAFT_475645	splicing factor 1	-	-	GO:0034399//nuclear periphery
CL104.Contig10_All	530	0	0	0	0	0	0	gi|297844066|ref|XP_002889914.1|	112.5	2e-30	expressed protein [Arabidopsis lyrata subsp. lyrata] >gi|297335756|gb|EFH66173.1| expressed protein [Arabidopsis lyrata subsp. lyrata]	gi|77817503|gb|DQ244827.1|	359	2e-96	Zea mays clone 11032 mRNA sequence	sp|Q39967|ALL5_HEVBR	57	1e-10	Major latex allergen Hev b 5 OS=Hevea brasiliensis PE=1 SV=3	XF1267	58.5	7e-10	COG5297	Cellobiohydrolase A (1,4-beta-cellobiosidase A)	K11323	1e-11	63.5	vcn:VOLCADRAFT_121342	histone arginine demethylase JMJD6 [EC:1.14.11.-]	GO:0016132//brassinosteroid biosynthetic process;GO:0009628//response to abiotic stimulus;GO:0006084//acetyl-CoA metabolic process;GO:0006950//response to stress;GO:0016126//sterol biosynthetic process	-	-
CL104.Contig11_All	645	0	0	0	0	0	0	gi|297844066|ref|XP_002889914.1|	127.1	1e-35	expressed protein [Arabidopsis lyrata subsp. lyrata] >gi|297335756|gb|EFH66173.1| expressed protein [Arabidopsis lyrata subsp. lyrata]	gi|77817503|gb|DQ244827.1|	305	4e-80	Zea mays clone 11032 mRNA sequence	sp|Q56WK6|PATL1_ARATH	66.2	1e-12	Patellin-1 OS=Arabidopsis thaliana GN=PATL1 PE=1 SV=2	YGR189c	63.9	2e-11	COG2273	Beta-glucanase/Beta-glucan synthetase	K11323	2e-14	72.4	vcn:VOLCADRAFT_121342	histone arginine demethylase JMJD6 [EC:1.14.11.-]	GO:0016132//brassinosteroid biosynthetic process;GO:0009651//response to salt stress;GO:0006084//acetyl-CoA metabolic process;GO:0046686//response to cadmium ion;GO:0016126//sterol biosynthetic process	-	-
CL104.Contig12_All	584	0	0	2	0.1086	0	0	gi|297844066|ref|XP_002889914.1|	115.2	3e-31	expressed protein [Arabidopsis lyrata subsp. lyrata] >gi|297335756|gb|EFH66173.1| expressed protein [Arabidopsis lyrata subsp. lyrata]	gi|77817503|gb|DQ244827.1|	295	3e-77	Zea mays clone 11032 mRNA sequence	sp|Q39967|ALL5_HEVBR	62.8	1e-12	Major latex allergen Hev b 5 OS=Hevea brasiliensis PE=1 SV=3	XF1267	68.9	3e-13	COG5297	Cellobiohydrolase A (1,4-beta-cellobiosidase A)	K11323	6e-15	73.6	vcn:VOLCADRAFT_121342	histone arginine demethylase JMJD6 [EC:1.14.11.-]	GO:0016132//brassinosteroid biosynthetic process;GO:0009628//response to abiotic stimulus;GO:0006084//acetyl-CoA metabolic process;GO:0006950//response to stress;GO:0016126//sterol biosynthetic process	-	-
CL104.Contig13_All	718	0	0	1	0.0442	0	0	gi|30682601|ref|NP_849650.1|	139.4	4e-40	vacuolar calcium-binding protein-like protein [Arabidopsis thaliana] >gi|3157925|gb|AAC17608.1| ESTs gb|F13979, gb|AA042648, gb|H77240, gb|T76189, gb|H35952, gb|T22022 and gb|T42279 come from this gene. A similar ORF is present on the opposite strand [Arabidopsis thaliana] >gi|22655314|gb|AAM98247.1| expressed protein [Arabidopsis thaliana] >gi|30102852|gb|AAP21344.1| At1g12080 [Arabidopsis thali…	gi|77817503|gb|DQ244827.1|	295	4e-77	Zea mays clone 11032 mRNA sequence	sp|Q39967|ALL5_HEVBR	68.2	2e-14	Major latex allergen Hev b 5 OS=Hevea brasiliensis PE=1 SV=3	XF1267	79.7	2e-16	COG5297	Cellobiohydrolase A (1,4-beta-cellobiosidase A)	K11323	2e-18	84.7	vcn:VOLCADRAFT_121342	histone arginine demethylase JMJD6 [EC:1.14.11.-]	GO:0016132//brassinosteroid biosynthetic process;GO:0009651//response to salt stress;GO:0006084//acetyl-CoA metabolic process;GO:0006816//calcium ion transport;GO:0007030//Golgi organization;GO:0046686//response to cadmium ion;GO:0016126//sterol biosynthetic process	-	-
CL104.Contig14_All	607	0	0	1	0.0522	0	0	gi|297844066|ref|XP_002889914.1|	140.2	7e-41	expressed protein [Arabidopsis lyrata subsp. lyrata] >gi|297335756|gb|EFH66173.1| expressed protein [Arabidopsis lyrata subsp. lyrata]	gi|77817503|gb|DQ244827.1|	317	9e-84	Zea mays clone 11032 mRNA sequence	sp|Q39967|ALL5_HEVBR	68.9	6e-15	Major latex allergen Hev b 5 OS=Hevea brasiliensis PE=1 SV=3	XF1267	79.7	7e-17	COG5297	Cellobiohydrolase A (1,4-beta-cellobiosidase A)	K11323	1e-17	81.3	vcn:VOLCADRAFT_121342	histone arginine demethylase JMJD6 [EC:1.14.11.-]	GO:0016132//brassinosteroid biosynthetic process;GO:0009651//response to salt stress;GO:0006084//acetyl-CoA metabolic process;GO:0046686//response to cadmium ion;GO:0016126//sterol biosynthetic process	-	-
CL104.Contig15_All	623	0	0	2	0.1018	0	0	gi|297844066|ref|XP_002889914.1|	141.7	2e-41	expressed protein [Arabidopsis lyrata subsp. lyrata] >gi|297335756|gb|EFH66173.1| expressed protein [Arabidopsis lyrata subsp. lyrata]	gi|77817503|gb|DQ244827.1|	317	9e-84	Zea mays clone 11032 mRNA sequence	sp|Q39967|ALL5_HEVBR	65.9	1e-13	Major latex allergen Hev b 5 OS=Hevea brasiliensis PE=1 SV=3	YPO0507	70.9	9e-14	COG3501	Uncharacterized protein conserved in bacteria	K11323	2e-14	72.4	vcn:VOLCADRAFT_121342	histone arginine demethylase JMJD6 [EC:1.14.11.-]	GO:0016132//brassinosteroid biosynthetic process;GO:0046686//response to cadmium ion;GO:0006084//acetyl-CoA metabolic process;GO:0016126//sterol biosynthetic process;GO:0009651//response to salt stress	-	-
CL104.Contig16_All	596	0	0	2	0.1064	0	0	gi|297844066|ref|XP_002889914.1|	139.4	1e-40	expressed protein [Arabidopsis lyrata subsp. lyrata] >gi|297335756|gb|EFH66173.1| expressed protein [Arabidopsis lyrata subsp. lyrata]	gi|77817503|gb|DQ244827.1|	192	3e-46	Zea mays clone 11032 mRNA sequence	sp|Q39967|ALL5_HEVBR	63.2	9e-13	Major latex allergen Hev b 5 OS=Hevea brasiliensis PE=1 SV=3	YPO0507	62	8e-11	COG3501	Uncharacterized protein conserved in bacteria	K11323	7e-14	70.5	vcn:VOLCADRAFT_121342	histone arginine demethylase JMJD6 [EC:1.14.11.-]	GO:0016132//brassinosteroid biosynthetic process;GO:0046686//response to cadmium ion;GO:0006084//acetyl-CoA metabolic process;GO:0016126//sterol biosynthetic process;GO:0009651//response to salt stress	-	-
CL104.Contig17_All	542	294	18.1206	2608	152.555	33	2.0848	gi|297844066|ref|XP_002889914.1|	142.1	6e-42	expressed protein [Arabidopsis lyrata subsp. lyrata] >gi|297335756|gb|EFH66173.1| expressed protein [Arabidopsis lyrata subsp. lyrata]	gi|77817503|gb|DQ244827.1|	317	8e-84	Zea mays clone 11032 mRNA sequence	sp|Q94C59|PATL4_ARATH	60.1	7e-11	Patellin-4 OS=Arabidopsis thaliana GN=PATL4 PE=1 SV=2	XF1267	75.9	8e-16	COG5297	Cellobiohydrolase A (1,4-beta-cellobiosidase A)	K11323	3e-17	79.7	vcn:VOLCADRAFT_121342	histone arginine demethylase JMJD6 [EC:1.14.11.-]	GO:0016132//brassinosteroid biosynthetic process;GO:0009651//response to salt stress;GO:0006084//acetyl-CoA metabolic process;GO:0046686//response to cadmium ion;GO:0016126//sterol biosynthetic process	-	-
CL104.Contig18_All	611	0	0	4	0.2076	0	0	gi|297844066|ref|XP_002889914.1|	149.8	1e-44	expressed protein [Arabidopsis lyrata subsp. lyrata] >gi|297335756|gb|EFH66173.1| expressed protein [Arabidopsis lyrata subsp. lyrata]	gi|77817503|gb|DQ244827.1|	291	5e-76	Zea mays clone 11032 mRNA sequence	sp|Q39967|ALL5_HEVBR	59.7	2e-11	Major latex allergen Hev b 5 OS=Hevea brasiliensis PE=1 SV=3	XF1267	61.6	1e-10	COG5297	Cellobiohydrolase A (1,4-beta-cellobiosidase A)	K11323	3e-14	71.6	vcn:VOLCADRAFT_121342	histone arginine demethylase JMJD6 [EC:1.14.11.-]	GO:0016132//brassinosteroid biosynthetic process;GO:0009651//response to salt stress;GO:0006084//acetyl-CoA metabolic process;GO:0046686//response to cadmium ion;GO:0016126//sterol biosynthetic process	-	-
CL104.Contig19_All	628	554	29.4696	1326	66.9425	374	20.3925	gi|297844066|ref|XP_002889914.1|	137.9	7e-40	expressed protein [Arabidopsis lyrata subsp. lyrata] >gi|297335756|gb|EFH66173.1| expressed protein [Arabidopsis lyrata subsp. lyrata]	gi|77817503|gb|DQ244827.1|	283	1e-73	Zea mays clone 11032 mRNA sequence	sp|Q39967|ALL5_HEVBR	61.6	4e-12	Major latex allergen Hev b 5 OS=Hevea brasiliensis PE=1 SV=3	YGR189c	64.3	1e-11	COG2273	Beta-glucanase/Beta-glucan synthetase	K11323	3e-14	72	vcn:VOLCADRAFT_121342	histone arginine demethylase JMJD6 [EC:1.14.11.-]	GO:0016132//brassinosteroid biosynthetic process;GO:0046686//response to cadmium ion;GO:0006084//acetyl-CoA metabolic process;GO:0016126//sterol biosynthetic process;GO:0009651//response to salt stress	-	-
CL104.Contig1_All	757	6	0.2648	30	1.2564	18	0.8142	gi|297844066|ref|XP_002889914.1|	139.8	5e-40	expressed protein [Arabidopsis lyrata subsp. lyrata] >gi|297335756|gb|EFH66173.1| expressed protein [Arabidopsis lyrata subsp. lyrata]	gi|77817503|gb|DQ244827.1|	293	2e-76	Zea mays clone 11032 mRNA sequence	sp|Q94C59|PATL4_ARATH	59.3	5e-10	Patellin-4 OS=Arabidopsis thaliana GN=PATL4 PE=1 SV=2	YGR189c	60.1	8e-10	COG2273	Beta-glucanase/Beta-glucan synthetase	K11323	5e-13	69.3	vcn:VOLCADRAFT_121342	histone arginine demethylase JMJD6 [EC:1.14.11.-]	GO:0016132//brassinosteroid biosynthetic process;GO:0050896//response to stimulus;GO:0006084//acetyl-CoA metabolic process;GO:0016126//sterol biosynthetic process	-	-
CL104.Contig20_All	728	0	0	24	1.0452	0	0	gi|297844066|ref|XP_002889914.1|	141.4	9e-41	expressed protein [Arabidopsis lyrata subsp. lyrata] >gi|297335756|gb|EFH66173.1| expressed protein [Arabidopsis lyrata subsp. lyrata]	gi|77817503|gb|DQ244827.1|	202	4e-49	Zea mays clone 11032 mRNA sequence	sp|Q39967|ALL5_HEVBR	63.2	2e-12	Major latex allergen Hev b 5 OS=Hevea brasiliensis PE=1 SV=3	YPO0507	60.5	6e-10	COG3501	Uncharacterized protein conserved in bacteria	K11323	1e-12	67.8	vcn:VOLCADRAFT_121342	histone arginine demethylase JMJD6 [EC:1.14.11.-]	GO:0016132//brassinosteroid biosynthetic process;GO:0050896//response to stimulus;GO:0006084//acetyl-CoA metabolic process;GO:0016126//sterol biosynthetic process	-	-
CL104.Contig21_All	635	0	0	1	0.0499	0	0	gi|297844066|ref|XP_002889914.1|	149.4	2e-44	expressed protein [Arabidopsis lyrata subsp. lyrata] >gi|297335756|gb|EFH66173.1| expressed protein [Arabidopsis lyrata subsp. lyrata]	gi|77817503|gb|DQ244827.1|	474	1e-131	Zea mays clone 11032 mRNA sequence	sp|Q39967|ALL5_HEVBR	59.7	2e-11	Major latex allergen Hev b 5 OS=Hevea brasiliensis PE=1 SV=3	XF1267	63.2	4e-11	COG5297	Cellobiohydrolase A (1,4-beta-cellobiosidase A)	K11323	7e-14	70.9	vcn:VOLCADRAFT_121342	histone arginine demethylase JMJD6 [EC:1.14.11.-]	GO:0016132//brassinosteroid biosynthetic process;GO:0009651//response to salt stress;GO:0006084//acetyl-CoA metabolic process;GO:0046686//response to cadmium ion;GO:0016126//sterol biosynthetic process	-	-
CL104.Contig22_All	646	0	0	8	0.3926	0	0	gi|297844066|ref|XP_002889914.1|	149.4	2e-44	expressed protein [Arabidopsis lyrata subsp. lyrata] >gi|297335756|gb|EFH66173.1| expressed protein [Arabidopsis lyrata subsp. lyrata]	gi|77817503|gb|DQ244827.1|	349	3e-93	Zea mays clone 11032 mRNA sequence	sp|Q39967|ALL5_HEVBR	59.7	2e-11	Major latex allergen Hev b 5 OS=Hevea brasiliensis PE=1 SV=3	aq_2032	63.5	3e-11	COG0532	Translation initiation factor 2 (IF-2; GTPase)	K11323	1e-13	70.5	vcn:VOLCADRAFT_121342	histone arginine demethylase JMJD6 [EC:1.14.11.-]	GO:0016132//brassinosteroid biosynthetic process;GO:0009651//response to salt stress;GO:0006084//acetyl-CoA metabolic process;GO:0046686//response to cadmium ion;GO:0016126//sterol biosynthetic process	-	-
CL104.Contig23_All	606	1	0.0551	0	0	2	0.113	gi|297844066|ref|XP_002889914.1|	138.7	2e-40	expressed protein [Arabidopsis lyrata subsp. lyrata] >gi|297335756|gb|EFH66173.1| expressed protein [Arabidopsis lyrata subsp. lyrata]	gi|77817503|gb|DQ244827.1|	226	2e-56	Zea mays clone 11032 mRNA sequence	sp|Q39967|ALL5_HEVBR	52.8	6e-09	Major latex allergen Hev b 5 OS=Hevea brasiliensis PE=1 SV=3	aq_2032	55.8	1e-08	COG0532	Translation initiation factor 2 (IF-2; GTPase)	K11323	2e-11	63.2	vcn:VOLCADRAFT_121342	histone arginine demethylase JMJD6 [EC:1.14.11.-]	GO:0016132//brassinosteroid biosynthetic process;GO:0046686//response to cadmium ion;GO:0006084//acetyl-CoA metabolic process;GO:0016126//sterol biosynthetic process;GO:0009651//response to salt stress	-	-
CL104.Contig24_All	755	124	5.4866	1334	56.0179	12	0.5442	gi|297844066|ref|XP_002889914.1|	143.7	1e-41	expressed protein [Arabidopsis lyrata subsp. lyrata] >gi|297335756|gb|EFH66173.1| expressed protein [Arabidopsis lyrata subsp. lyrata]	gi|77817503|gb|DQ244827.1|	337	1e-89	Zea mays clone 11032 mRNA sequence	sp|Q39967|ALL5_HEVBR	65.9	2e-13	Major latex allergen Hev b 5 OS=Hevea brasiliensis PE=1 SV=3	YPO0507	69.3	8e-13	COG3501	Uncharacterized protein conserved in bacteria	K11323	7e-13	68.9	vcn:VOLCADRAFT_121342	histone arginine demethylase JMJD6 [EC:1.14.11.-]	GO:0016132//brassinosteroid biosynthetic process;GO:0046686//response to cadmium ion;GO:0006084//acetyl-CoA metabolic process;GO:0016126//sterol biosynthetic process;GO:0009651//response to salt stress	-	-
CL104.Contig25_All	743	1634	73.4663	11165	476.418	149	6.8668	gi|297844066|ref|XP_002889914.1|	151.8	9e-45	expressed protein [Arabidopsis lyrata subsp. lyrata] >gi|297335756|gb|EFH66173.1| expressed protein [Arabidopsis lyrata subsp. lyrata]	gi|77817503|gb|DQ244827.1|	301	6e-79	Zea mays clone 11032 mRNA sequence	sp|Q39967|ALL5_HEVBR	56.2	7e-10	Major latex allergen Hev b 5 OS=Hevea brasiliensis PE=1 SV=3	Cgl2013	59.3	1e-09	COG0552	Signal recognition particle GTPase	K11323	7e-13	68.9	vcn:VOLCADRAFT_121342	histone arginine demethylase JMJD6 [EC:1.14.11.-]	GO:0016132//brassinosteroid biosynthetic process;GO:0046686//response to cadmium ion;GO:0006084//acetyl-CoA metabolic process;GO:0016126//sterol biosynthetic process;GO:0009651//response to salt stress	-	-
CL104.Contig26_All	700	549	26.1999	4942	223.832	46	2.2502	gi|297844066|ref|XP_002889914.1|	139.4	4e-40	expressed protein [Arabidopsis lyrata subsp. lyrata] >gi|297335756|gb|EFH66173.1| expressed protein [Arabidopsis lyrata subsp. lyrata]	gi|77817503|gb|DQ244827.1|	359	3e-96	Zea mays clone 11032 mRNA sequence	sp|Q39967|ALL5_HEVBR	59.3	4e-11	Major latex allergen Hev b 5 OS=Hevea brasiliensis PE=1 SV=3	XF1267	66.6	4e-12	COG5297	Cellobiohydrolase A (1,4-beta-cellobiosidase A)	K11323	6e-14	71.6	vcn:VOLCADRAFT_121342	histone arginine demethylase JMJD6 [EC:1.14.11.-]	GO:0016132//brassinosteroid biosynthetic process;GO:0046686//response to cadmium ion;GO:0006084//acetyl-CoA metabolic process;GO:0016126//sterol biosynthetic process;GO:0009651//response to salt stress	-	-
CL104.Contig27_All	671	84	4.182	864	40.8234	2	0.1021	gi|297844066|ref|XP_002889914.1|	120.9	5e-33	expressed protein [Arabidopsis lyrata subsp. lyrata] >gi|297335756|gb|EFH66173.1| expressed protein [Arabidopsis lyrata subsp. lyrata]	gi|77817503|gb|DQ244827.1|	244	1e-61	Zea mays clone 11032 mRNA sequence	sp|P33191|TUB8_SOLTU	54.7	4e-09	Induced stolen tip protein TUB8 (Fragment) OS=Solanum tuberosum GN=TUB8 PE=2 SV=1	PAB1382	57	5e-09	COG3351	Putative archaeal flagellar protein D/E	K11323	1e-11	64.7	vcn:VOLCADRAFT_121342	histone arginine demethylase JMJD6 [EC:1.14.11.-]	GO:0006694//steroid biosynthetic process;GO:0046686//response to cadmium ion;GO:0009987//cellular process;GO:0009651//response to salt stress;GO:0046165	-	-
CL104.Contig28_All	659	0	0	5	0.2405	0	0	gi|297844066|ref|XP_002889914.1|	125.2	1e-34	expressed protein [Arabidopsis lyrata subsp. lyrata] >gi|297335756|gb|EFH66173.1| expressed protein [Arabidopsis lyrata subsp. lyrata]	gi|77817503|gb|DQ244827.1|	278	8e-72	Zea mays clone 11032 mRNA sequence	sp|Q94C59|PATL4_ARATH	56.6	2e-09	Patellin-4 OS=Arabidopsis thaliana GN=PATL4 PE=1 SV=2	XF1267	65.9	6e-12	COG5297	Cellobiohydrolase A (1,4-beta-cellobiosidase A)	K11323	6e-14	71.2	vcn:VOLCADRAFT_121342	histone arginine demethylase JMJD6 [EC:1.14.11.-]	GO:0016132//brassinosteroid biosynthetic process;GO:0007030//Golgi organization;GO:0006816//calcium ion transport;GO:0046686//response to cadmium ion;GO:0006084//acetyl-CoA metabolic process;GO:0016126//sterol biosynthetic process;GO:0009651//response to salt stress	-	-
CL104.Contig29_All	711	0	0	0	0	0	0	gi|297844066|ref|XP_002889914.1|	139.4	4e-40	expressed protein [Arabidopsis lyrata subsp. lyrata] >gi|297335756|gb|EFH66173.1| expressed protein [Arabidopsis lyrata subsp. lyrata]	gi|77817503|gb|DQ244827.1|	244	1e-61	Zea mays clone 11032 mRNA sequence	sp|Q39967|ALL5_HEVBR	59.3	4e-11	Major latex allergen Hev b 5 OS=Hevea brasiliensis PE=1 SV=3	XF1267	66.6	4e-12	COG5297	Cellobiohydrolase A (1,4-beta-cellobiosidase A)	K11323	7e-14	71.6	vcn:VOLCADRAFT_121342	histone arginine demethylase JMJD6 [EC:1.14.11.-]	GO:0016132//brassinosteroid biosynthetic process;GO:0007030//Golgi organization;GO:0006816//calcium ion transport;GO:0046686//response to cadmium ion;GO:0006084//acetyl-CoA metabolic process;GO:0016126//sterol biosynthetic process;GO:0009651//response to salt stress	-	-
CL104.Contig2_All	663	0	0	1	0.0478	0	0	gi|30682601|ref|NP_849650.1|	134	3e-38	vacuolar calcium-binding protein-like protein [Arabidopsis thaliana] >gi|3157925|gb|AAC17608.1| ESTs gb|F13979, gb|AA042648, gb|H77240, gb|T76189, gb|H35952, gb|T22022 and gb|T42279 come from this gene. A similar ORF is present on the opposite strand [Arabidopsis thaliana] >gi|22655314|gb|AAM98247.1| expressed protein [Arabidopsis thaliana] >gi|30102852|gb|AAP21344.1| At1g12080 [Arabidopsis thali…	gi|77817503|gb|DQ244827.1|	295	3e-77	Zea mays clone 11032 mRNA sequence	sp|Q39967|ALL5_HEVBR	66.6	7e-14	Major latex allergen Hev b 5 OS=Hevea brasiliensis PE=1 SV=3	aq_2032	68.6	7e-13	COG0532	Translation initiation factor 2 (IF-2; GTPase)	K11323	2e-15	75.5	vcn:VOLCADRAFT_121342	histone arginine demethylase JMJD6 [EC:1.14.11.-]	GO:0016132//brassinosteroid biosynthetic process;GO:0006810//transport;GO:0009651//response to salt stress;GO:0006084//acetyl-CoA metabolic process;GO:0046686//response to cadmium ion;GO:0016126//sterol biosynthetic process	-	-
CL104.Contig30_All	729	491	22.4998	2020	87.8501	168	7.8911	gi|297844066|ref|XP_002889914.1|	137.5	3e-39	expressed protein [Arabidopsis lyrata subsp. lyrata] >gi|297335756|gb|EFH66173.1| expressed protein [Arabidopsis lyrata subsp. lyrata]	gi|77817503|gb|DQ244827.1|	396	1e-107	Zea mays clone 11032 mRNA sequence	sp|Q94C59|PATL4_ARATH	60.8	1e-10	Patellin-4 OS=Arabidopsis thaliana GN=PATL4 PE=1 SV=2	XF1267	76.6	2e-15	COG5297	Cellobiohydrolase A (1,4-beta-cellobiosidase A)	K11323	7e-17	80.5	vcn:VOLCADRAFT_121342	histone arginine demethylase JMJD6 [EC:1.14.11.-]	GO:0016132//brassinosteroid biosynthetic process;GO:0009651//response to salt stress;GO:0006084//acetyl-CoA metabolic process;GO:0006816//calcium ion transport;GO:0007030//Golgi organization;GO:0046686//response to cadmium ion;GO:0016126//sterol biosynthetic process	-	-
CL104.Contig31_All	664	30	1.5093	160	7.6396	6	0.3094	gi|297844066|ref|XP_002889914.1|	137.5	1e-39	expressed protein [Arabidopsis lyrata subsp. lyrata] >gi|297335756|gb|EFH66173.1| expressed protein [Arabidopsis lyrata subsp. lyrata]	gi|77817503|gb|DQ244827.1|	440	1e-120	Zea mays clone 11032 mRNA sequence	sp|Q94C59|PATL4_ARATH	60.8	8e-11	Patellin-4 OS=Arabidopsis thaliana GN=PATL4 PE=1 SV=2	XF1267	76.6	1e-15	COG5297	Cellobiohydrolase A (1,4-beta-cellobiosidase A)	K11323	2e-17	81.6	vcn:VOLCADRAFT_121342	histone arginine demethylase JMJD6 [EC:1.14.11.-]	GO:0016132//brassinosteroid biosynthetic process;GO:0009651//response to salt stress;GO:0006084//acetyl-CoA metabolic process;GO:0006816//calcium ion transport;GO:0007030//Golgi organization;GO:0046686//response to cadmium ion;GO:0016126//sterol biosynthetic process	-	-
CL104.Contig32_All	771	8	0.3466	134	5.5102	2	0.0888	gi|297844066|ref|XP_002889914.1|	145.6	3e-42	expressed protein [Arabidopsis lyrata subsp. lyrata] >gi|297335756|gb|EFH66173.1| expressed protein [Arabidopsis lyrata subsp. lyrata]	gi|77817503|gb|DQ244827.1|	262	6e-67	Zea mays clone 11032 mRNA sequence	sp|Q94C59|PATL4_ARATH	66.2	2e-12	Patellin-4 OS=Arabidopsis thaliana GN=PATL4 PE=1 SV=2	YPO0507	70.9	3e-13	COG3501	Uncharacterized protein conserved in bacteria	K11323	2e-14	73.6	vcn:VOLCADRAFT_121342	histone arginine demethylase JMJD6 [EC:1.14.11.-]	GO:0016132//brassinosteroid biosynthetic process;GO:0007030//Golgi organization;GO:0006816//calcium ion transport;GO:0046686//response to cadmium ion;GO:0006084//acetyl-CoA metabolic process;GO:0016126//sterol biosynthetic process;GO:0009651//response to salt stress	-	-
CL104.Contig33_All	759	0	0	0	0	0	0	gi|30682601|ref|NP_849650.1|	149.1	1e-43	vacuolar calcium-binding protein-like protein [Arabidopsis thaliana] >gi|3157925|gb|AAC17608.1| ESTs gb|F13979, gb|AA042648, gb|H77240, gb|T76189, gb|H35952, gb|T22022 and gb|T42279 come from this gene. A similar ORF is present on the opposite strand [Arabidopsis thaliana] >gi|22655314|gb|AAM98247.1| expressed protein [Arabidopsis thaliana] >gi|30102852|gb|AAP21344.1| At1g12080 [Arabidopsis thali…	gi|77817503|gb|DQ244827.1|	218	8e-54	Zea mays clone 11032 mRNA sequence	sp|Q39967|ALL5_HEVBR	68.2	3e-14	Major latex allergen Hev b 5 OS=Hevea brasiliensis PE=1 SV=3	aq_2032	68.9	1e-12	COG0532	Translation initiation factor 2 (IF-2; GTPase)	K11323	4e-15	75.5	vcn:VOLCADRAFT_121342	histone arginine demethylase JMJD6 [EC:1.14.11.-]	GO:0016132//brassinosteroid biosynthetic process;GO:0009651//response to salt stress;GO:0006084//acetyl-CoA metabolic process;GO:0046686//response to cadmium ion;GO:0016126//sterol biosynthetic process	-	-
CL104.Contig34_All	786	0	0	0	0	0	0	gi|30682601|ref|NP_849650.1|	151.4	2e-44	vacuolar calcium-binding protein-like protein [Arabidopsis thaliana] >gi|3157925|gb|AAC17608.1| ESTs gb|F13979, gb|AA042648, gb|H77240, gb|T76189, gb|H35952, gb|T22022 and gb|T42279 come from this gene. A similar ORF is present on the opposite strand [Arabidopsis thaliana] >gi|22655314|gb|AAM98247.1| expressed protein [Arabidopsis thaliana] >gi|30102852|gb|AAP21344.1| At1g12080 [Arabidopsis thali…	gi|77817503|gb|DQ244827.1|	335	5e-89	Zea mays clone 11032 mRNA sequence	sp|Q39967|ALL5_HEVBR	65.5	3e-13	Major latex allergen Hev b 5 OS=Hevea brasiliensis PE=1 SV=3	aq_2032	69.3	9e-13	COG0532	Translation initiation factor 2 (IF-2; GTPase)	K11323	1e-15	77.4	vcn:VOLCADRAFT_121342	histone arginine demethylase JMJD6 [EC:1.14.11.-]	GO:0016132//brassinosteroid biosynthetic process;GO:0009651//response to salt stress;GO:0006084//acetyl-CoA metabolic process;GO:0006816//calcium ion transport;GO:0007030//Golgi organization;GO:0046686//response to cadmium ion;GO:0016126//sterol biosynthetic process	-	-
CL104.Contig35_All	744	0	0	0	0	0	0	gi|297844066|ref|XP_002889914.1|	143.3	2e-41	expressed protein [Arabidopsis lyrata subsp. lyrata] >gi|297335756|gb|EFH66173.1| expressed protein [Arabidopsis lyrata subsp. lyrata]	gi|77817503|gb|DQ244827.1|	180	2e-42	Zea mays clone 11032 mRNA sequence	sp|Q39967|ALL5_HEVBR	65.5	3e-13	Major latex allergen Hev b 5 OS=Hevea brasiliensis PE=1 SV=3	Cgl2013	64.7	2e-11	COG0552	Signal recognition particle GTPase	K11323	2e-14	73.2	vcn:VOLCADRAFT_121342	histone arginine demethylase JMJD6 [EC:1.14.11.-]	GO:0016132//brassinosteroid biosynthetic process;GO:0009651//response to salt stress;GO:0006084//acetyl-CoA metabolic process;GO:0046686//response to cadmium ion;GO:0016126//sterol biosynthetic process	-	-
CL104.Contig3_All	730	924	42.2838	10244	444.903	88	4.1278	gi|297844066|ref|XP_002889914.1|	142.1	4e-41	expressed protein [Arabidopsis lyrata subsp. lyrata] >gi|297335756|gb|EFH66173.1| expressed protein [Arabidopsis lyrata subsp. lyrata]	gi|77817503|gb|DQ244827.1|	295	4e-77	Zea mays clone 11032 mRNA sequence	sp|Q39967|ALL5_HEVBR	68.6	2e-14	Major latex allergen Hev b 5 OS=Hevea brasiliensis PE=1 SV=3	Cgl2013	75.9	3e-15	COG0552	Signal recognition particle GTPase	K11323	3e-16	78.6	vcn:VOLCADRAFT_121342	histone arginine demethylase JMJD6 [EC:1.14.11.-]	GO:0016132//brassinosteroid biosynthetic process;GO:0009651//response to salt stress;GO:0006084//acetyl-CoA metabolic process;GO:0046686//response to cadmium ion;GO:0016126//sterol biosynthetic process	-	-
CL104.Contig4_All	746	167	7.4783	1193	50.7014	19	0.8721	gi|297844066|ref|XP_002889914.1|	154.1	1e-45	expressed protein [Arabidopsis lyrata subsp. lyrata] >gi|297335756|gb|EFH66173.1| expressed protein [Arabidopsis lyrata subsp. lyrata]	gi|77817503|gb|DQ244827.1|	410	1e-111	Zea mays clone 11032 mRNA sequence	sp|Q39967|ALL5_HEVBR	62.4	4e-12	Major latex allergen Hev b 5 OS=Hevea brasiliensis PE=1 SV=3	Cgl2013	62.4	1e-10	COG0552	Signal recognition particle GTPase	K11323	2e-13	70.9	vcn:VOLCADRAFT_121342	histone arginine demethylase JMJD6 [EC:1.14.11.-]	GO:0016132//brassinosteroid biosynthetic process;GO:0009651//response to salt stress;GO:0006084//acetyl-CoA metabolic process;GO:0046686//response to cadmium ion;GO:0016126//sterol biosynthetic process	-	-
CL104.Contig5_All	608	0	0	2	0.1043	0	0	gi|30682601|ref|NP_849650.1|	125.6	4e-35	vacuolar calcium-binding protein-like protein [Arabidopsis thaliana] >gi|3157925|gb|AAC17608.1| ESTs gb|F13979, gb|AA042648, gb|H77240, gb|T76189, gb|H35952, gb|T22022 and gb|T42279 come from this gene. A similar ORF is present on the opposite strand [Arabidopsis thaliana] >gi|22655314|gb|AAM98247.1| expressed protein [Arabidopsis thaliana] >gi|30102852|gb|AAP21344.1| At1g12080 [Arabidopsis thali…	gi|77817503|gb|DQ244827.1|	295	3e-77	Zea mays clone 11032 mRNA sequence	sp|Q94C59|PATL4_ARATH	65.1	2e-12	Patellin-4 OS=Arabidopsis thaliana GN=PATL4 PE=1 SV=2	aq_2032	72.4	2e-14	COG0532	Translation initiation factor 2 (IF-2; GTPase)	K11323	1e-15	75.9	vcn:VOLCADRAFT_121342	histone arginine demethylase JMJD6 [EC:1.14.11.-]	GO:0016132//brassinosteroid biosynthetic process;GO:0009651//response to salt stress;GO:0006084//acetyl-CoA metabolic process;GO:0046686//response to cadmium ion;GO:0016126//sterol biosynthetic process	-	-
CL104.Contig6_All	680	0	0	0	0	0	0	gi|297844066|ref|XP_002889914.1|	127.1	2e-35	expressed protein [Arabidopsis lyrata subsp. lyrata] >gi|297335756|gb|EFH66173.1| expressed protein [Arabidopsis lyrata subsp. lyrata]	gi|77817503|gb|DQ244827.1|	180	1e-42	Zea mays clone 11032 mRNA sequence	sp|Q56WK6|PATL1_ARATH	66.2	1e-12	Patellin-1 OS=Arabidopsis thaliana GN=PATL1 PE=1 SV=2	YGR189c	63.2	5e-11	COG2273	Beta-glucanase/Beta-glucan synthetase	K11323	3e-14	72.4	vcn:VOLCADRAFT_121342	histone arginine demethylase JMJD6 [EC:1.14.11.-]	GO:0016132//brassinosteroid biosynthetic process;GO:0009651//response to salt stress;GO:0006084//acetyl-CoA metabolic process;GO:0046686//response to cadmium ion;GO:0016126//sterol biosynthetic process	-	-
CL104.Contig7_All	635	0	0	0	0	0	0	gi|30682601|ref|NP_849650.1|	127.9	6e-36	vacuolar calcium-binding protein-like protein [Arabidopsis thaliana] >gi|3157925|gb|AAC17608.1| ESTs gb|F13979, gb|AA042648, gb|H77240, gb|T76189, gb|H35952, gb|T22022 and gb|T42279 come from this gene. A similar ORF is present on the opposite strand [Arabidopsis thaliana] >gi|22655314|gb|AAM98247.1| expressed protein [Arabidopsis thaliana] >gi|30102852|gb|AAP21344.1| At1g12080 [Arabidopsis thali…	gi|77817503|gb|DQ244827.1|	295	3e-77	Zea mays clone 11032 mRNA sequence	sp|Q39967|ALL5_HEVBR	63.9	6e-13	Major latex allergen Hev b 5 OS=Hevea brasiliensis PE=1 SV=3	aq_2032	73.6	1e-14	COG0532	Translation initiation factor 2 (IF-2; GTPase)	K11323	6e-17	79.7	vcn:VOLCADRAFT_121342	histone arginine demethylase JMJD6 [EC:1.14.11.-]	GO:0016132//brassinosteroid biosynthetic process;GO:0009651//response to salt stress;GO:0006084//acetyl-CoA metabolic process;GO:0006816//calcium ion transport;GO:0007030//Golgi organization;GO:0046686//response to cadmium ion;GO:0016126//sterol biosynthetic process	-	-
CL104.Contig8_All	565	0	0	0	0	0	0	gi|297844066|ref|XP_002889914.1|	112.5	3e-30	expressed protein [Arabidopsis lyrata subsp. lyrata] >gi|297335756|gb|EFH66173.1| expressed protein [Arabidopsis lyrata subsp. lyrata]	gi|77817503|gb|DQ244827.1|	234	9e-59	Zea mays clone 11032 mRNA sequence	sp|Q39967|ALL5_HEVBR	57	1e-10	Major latex allergen Hev b 5 OS=Hevea brasiliensis PE=1 SV=3	XF1267	58.5	9e-10	COG5297	Cellobiohydrolase A (1,4-beta-cellobiosidase A)	K11323	5e-12	64.7	vcn:VOLCADRAFT_121342	histone arginine demethylase JMJD6 [EC:1.14.11.-]	GO:0016132//brassinosteroid biosynthetic process;GO:0009651//response to salt stress;GO:0006084//acetyl-CoA metabolic process;GO:0046686//response to cadmium ion;GO:0016126//sterol biosynthetic process	-	-
CL104.Contig9_All	525	0	0	0	0	0	0	gi|297844066|ref|XP_002889914.1|	94	3e-23	expressed protein [Arabidopsis lyrata subsp. lyrata] >gi|297335756|gb|EFH66173.1| expressed protein [Arabidopsis lyrata subsp. lyrata]	gi|77817503|gb|DQ244827.1|	135	6e-29	Zea mays clone 11032 mRNA sequence	sp|Q39967|ALL5_HEVBR	44.7	4e-06	Major latex allergen Hev b 5 OS=Hevea brasiliensis PE=1 SV=3	Cgl2013	49.3	1e-06	COG0552	Signal recognition particle GTPase	K11323	1e-08	54.7	vcn:VOLCADRAFT_121342	histone arginine demethylase JMJD6 [EC:1.14.11.-]	GO:0006694//steroid biosynthetic process;GO:0050896//response to stimulus;GO:0009987//cellular process;GO:0046165	-	-
CL1040.Contig1_All	1129	26	0.7693	219	6.1499	78980	2395.42	gi|297787439|gb|ADI52861.1|	537.7	0	chloroplast beta-carbonic anhydrase [Brassica napus]	gi|297787438|gb|GQ356780.1|	1084	0	Brassica napus chloroplast beta-carbonic anhydrase mRNA, complete cds; nuclear gene for chloroplast product	sp|P27140|CAHC_ARATH	530	0	Carbonic anhydrase, chloroplastic OS=Arabidopsis thaliana GN=CA1 PE=1 SV=2	BMEI0222	118	6e-31	COG0288	Carbonic anhydrase	K01673	0	534	aly:ARALYDRAFT_477371	carbonic anhydrase [EC:4.2.1.1]	GO:0031348//negative regulation of defense response;GO:0019684//photosynthesis, light reaction;GO:0006098//pentose-phosphate shunt;GO:0009595//detection of biotic stimulus;GO:0010119//regulation of stomatal movement;GO:0009867//jasmonic acid mediated signaling pathway;GO:0009697//salicylic acid biosynthetic process;GO:0009862//systemic acquired resistance, salicylic acid mediated signaling pathwa…	GO:0008270//zinc ion binding;GO:0004089//carbonate dehydratase activity	GO:0009941//chloroplast envelope;GO:0048046//apoplast;GO:0010319//stromule;GO:0005829//cytosol;GO:0009570//chloroplast stroma;GO:0009535//chloroplast thylakoid membrane
CL1040.Contig2_All	202	0	0	0	0	27	4.5769	gi|567204356|ref|XP_006408513.1|	84	2e-19	hypothetical protein EUTSA_v10020995mg [Eutrema salsugineum] >gi|557109659|gb|ESQ49966.1| hypothetical protein EUTSA_v10020995mg [Eutrema salsugineum]	gi|45451863|gb|AY551530.1|	198	2e-48	Thlaspi caerulescens chloroplast carbonic anhydrase precursor mRNA, complete cds; nuclear gene for chloroplast product	sp|P27140|CAHC_ARATH	77	1e-18	Carbonic anhydrase, chloroplastic OS=Arabidopsis thaliana GN=CA1 PE=1 SV=2	--	--	--	--	--	K01673	3e-19	79.7	aly:ARALYDRAFT_477371	carbonic anhydrase [EC:4.2.1.1]	GO:0031348//negative regulation of defense response;GO:0019684//photosynthesis, light reaction;GO:0006098//pentose-phosphate shunt;GO:0009595//detection of biotic stimulus;GO:0010119//regulation of stomatal movement;GO:0009867//jasmonic acid mediated signaling pathway;GO:0009697//salicylic acid biosynthetic process;GO:0009862//systemic acquired resistance, salicylic acid mediated signaling pathwa…	GO:0008270//zinc ion binding;GO:0004089//carbonate dehydratase activity	GO:0009941//chloroplast envelope;GO:0048046//apoplast;GO:0010319//stromule;GO:0009570//chloroplast stroma;GO:0009535//chloroplast thylakoid membrane
CL1041.Contig1_All	242	10	1.3804	17	2.2272	7	0.9905	gi|110738493|dbj|BAF01172.1|	147.5	1e-43	bHLH transcription factor like protein [Arabidopsis thaliana]	gi|186478318|ref|NM_100886.6|	297	3e-78	Arabidopsis thaliana transcription factor bHLH74 mRNA, complete cds	sp|Q6NKN9|BH074_ARATH	147	6e-45	Transcription factor bHLH74 OS=Arabidopsis thaliana GN=BHLH74 PE=2 SV=1	--	--	--	--	--	K12126	4e-12	60.8	ath:AT1G09530	phytochrome-interacting factor 3	GO:0006355//regulation of transcription, DNA-dependent	GO:0003700//sequence-specific DNA binding transcription factor activity;GO:0003677//DNA binding;GO:0046983//protein dimerization activity	GO:0005634//nucleus
CL1041.Contig2_All	1294	296	7.6416	424	10.3884	61	1.6142	gi|567153451|ref|XP_006417495.1|	597.8	0	hypothetical protein EUTSA_v10008002mg [Eutrema salsugineum] >gi|557095266|gb|ESQ35848.1| hypothetical protein EUTSA_v10008002mg [Eutrema salsugineum]	gi|186478318|ref|NM_100886.6|	839	0	Arabidopsis thaliana transcription factor bHLH74 mRNA, complete cds	sp|Q6NKN9|BH074_ARATH	553	0	Transcription factor bHLH74 OS=Arabidopsis thaliana GN=BHLH74 PE=2 SV=1	--	--	--	--	--	K12126	1e-16	83.6	aly:ARALYDRAFT_471048	phytochrome-interacting factor 3	GO:0006355//regulation of transcription, DNA-dependent	GO:0003700//sequence-specific DNA binding transcription factor activity;GO:0003677//DNA binding;GO:0046983//protein dimerization activity	GO:0005634//nucleus
CL1041.Contig3_All	640	80	4.1758	86	4.2603	14	0.749	gi|567153451|ref|XP_006417495.1|	264.6	1e-86	hypothetical protein EUTSA_v10008002mg [Eutrema salsugineum] >gi|557095266|gb|ESQ35848.1| hypothetical protein EUTSA_v10008002mg [Eutrema salsugineum]	gi|186478318|ref|NM_100886.6|	281	5e-73	Arabidopsis thaliana transcription factor bHLH74 mRNA, complete cds	sp|Q6NKN9|BH074_ARATH	235	5e-77	Transcription factor bHLH74 OS=Arabidopsis thaliana GN=BHLH74 PE=2 SV=1	--	--	--	--	--	--	--	--	--	--	GO:0006355//regulation of transcription, DNA-dependent	GO:0003700//sequence-specific DNA binding transcription factor activity;GO:0003677//DNA binding;GO:0046983//protein dimerization activity	GO:0005634//nucleus
CL1042.Contig1_All	973	464	15.9305	246	8.0157	116	4.0823	gi|567138709|ref|XP_006394577.1|	305.1	1e-103	hypothetical protein EUTSA_v10005056mg [Eutrema salsugineum] >gi|557091216|gb|ESQ31863.1| hypothetical protein EUTSA_v10005056mg [Eutrema salsugineum]	gi|222424339|dbj|AK317460.1|	648	0	Arabidopsis thaliana AT5G23090 mRNA, complete cds, clone: RAFL23-07-M17	sp|P49592|NC2B_ARATH	297	2e-102	Protein Dr1 homolog OS=Arabidopsis thaliana GN=DR1 PE=2 SV=1	SPBC30D10.02	117	1e-31	COG5150	Class 2 transcription repressor NC2, beta subunit (Dr1)	K08065	3e-17	79	zma:100285917	nuclear transcription Y subunit beta	GO:0006355//regulation of transcription, DNA-dependent	GO:0003700//sequence-specific DNA binding transcription factor activity;GO:0043565//sequence-specific DNA binding;GO:0046982//protein heterodimerization activity	GO:0005634//nucleus
CL1042.Contig2_All	625	336	17.9591	178	9.0294	87	4.7665	gi|567171649|ref|XP_006399306.1|	307	2e-106	hypothetical protein EUTSA_v10014894mg [Eutrema salsugineum] >gi|557100396|gb|ESQ40759.1| hypothetical protein EUTSA_v10014894mg [Eutrema salsugineum]	gi|145357775|ref|NM_120902.2|	549	1e-153	Arabidopsis thaliana nuclear factor Y, subunit B12 mRNA, complete cds	sp|P49592|NC2B_ARATH	284	4e-99	Protein Dr1 homolog OS=Arabidopsis thaliana GN=DR1 PE=2 SV=1	SPBC30D10.02	117	5e-33	COG5150	Class 2 transcription repressor NC2, beta subunit (Dr1)	K08065	1e-18	80.5	zma:100285917	nuclear transcription Y subunit beta	GO:0006355//regulation of transcription, DNA-dependent	GO:0003700//sequence-specific DNA binding transcription factor activity;GO:0043565//sequence-specific DNA binding;GO:0046982//protein heterodimerization activity	GO:0005634//nucleus
CL1043.Contig1_All	940	386	13.7178	265	8.9379	81	2.9506	gi|567218598|ref|XP_006412928.1|	370.9	1e-128	hypothetical protein EUTSA_v10026085mg [Eutrema salsugineum] >gi|312282573|dbj|BAJ34152.1| unnamed protein product [Thellungiella halophila] >gi|557114098|gb|ESQ54381.1| hypothetical protein EUTSA_v10026085mg [Eutrema salsugineum]	gi|297803209|ref|XM_002869443.1|	371	1e-99	Arabidopsis lyrata subsp. lyrata indoleacetic acid-induced protein 11 (IAA11), mRNA	sp|Q38829|IAA11_ARATH	361	1e-126	Auxin-responsive protein IAA11 OS=Arabidopsis thaliana GN=IAA11 PE=1 SV=1	--	--	--	--	--	K14484	8e-47	159	aly:ARALYDRAFT_470436	auxin-responsive protein IAA	GO:0009734//auxin mediated signaling pathway;GO:0006355//regulation of transcription, DNA-dependent;GO:0010583//response to cyclopentenone	GO:0046983//protein dimerization activity;GO:0003700//sequence-specific DNA binding transcription factor activity	GO:0009506//plasmodesma;GO:0005634//nucleus
CL1043.Contig2_All	812	3	0.1234	1	0.039	0	0	gi|567218598|ref|XP_006412928.1|	296.6	8e-100	hypothetical protein EUTSA_v10026085mg [Eutrema salsugineum] >gi|312282573|dbj|BAJ34152.1| unnamed protein product [Thellungiella halophila] >gi|557114098|gb|ESQ54381.1| hypothetical protein EUTSA_v10026085mg [Eutrema salsugineum]	gi|312282572|dbj|AK353066.1|	484	1e-134	Thellungiella halophila mRNA, complete cds, clone: RTFL01-16-K14	sp|Q38829|IAA11_ARATH	285	4e-97	Auxin-responsive protein IAA11 OS=Arabidopsis thaliana GN=IAA11 PE=1 SV=1	--	--	--	--	--	K14484	4e-54	176	aly:ARALYDRAFT_470436	auxin-responsive protein IAA	GO:0009734//auxin mediated signaling pathway;GO:0006355//regulation of transcription, DNA-dependent;GO:0010583//response to cyclopentenone	GO:0046983//protein dimerization activity;GO:0003700//sequence-specific DNA binding transcription factor activity	GO:0009506//plasmodesma;GO:0005634//nucleus
CL1043.Contig3_All	883	34	1.2863	4	0.1436	0	0	gi|567218598|ref|XP_006412928.1|	298.9	2e-100	hypothetical protein EUTSA_v10026085mg [Eutrema salsugineum] >gi|312282573|dbj|BAJ34152.1| unnamed protein product [Thellungiella halophila] >gi|557114098|gb|ESQ54381.1| hypothetical protein EUTSA_v10026085mg [Eutrema salsugineum]	gi|312282572|dbj|AK353066.1|	509	1e-141	Thellungiella halophila mRNA, complete cds, clone: RTFL01-16-K14	sp|Q38829|IAA11_ARATH	285	1e-96	Auxin-responsive protein IAA11 OS=Arabidopsis thaliana GN=IAA11 PE=1 SV=1	--	--	--	--	--	K14484	9e-53	173	aly:ARALYDRAFT_470436	auxin-responsive protein IAA	GO:0009734//auxin mediated signaling pathway;GO:0006355//regulation of transcription, DNA-dependent;GO:0010583//response to cyclopentenone	GO:0046983//protein dimerization activity;GO:0003700//sequence-specific DNA binding transcription factor activity	GO:0009506//plasmodesma;GO:0005634//nucleus
CL1043.Contig4_All	1157	352	10.1633	150	4.1103	16	0.4735	gi|567211873|ref|XP_006410469.1|	448.7	6e-158	hypothetical protein EUTSA_v10017143mg [Eutrema salsugineum] >gi|557111638|gb|ESQ51922.1| hypothetical protein EUTSA_v10017143mg [Eutrema salsugineum]	gi|312282512|dbj|AK353036.1|	1057	0	Thellungiella halophila mRNA, complete cds, clone: RTFL01-09-P05	sp|Q38831|IAA13_ARATH	441	5e-157	Auxin-responsive protein IAA13 OS=Arabidopsis thaliana GN=IAA13 PE=1 SV=2	--	--	--	--	--	K14484	5e-121	351	aly:ARALYDRAFT_470436	auxin-responsive protein IAA	GO:0009086//methionine biosynthetic process;GO:0048364//root development;GO:0009880//embryonic pattern specification;GO:0009734//auxin mediated signaling pathway;GO:0010051//xylem and phloem pattern formation;GO:0000394//RNA splicing, via endonucleolytic cleavage and ligation;GO:0045892//negative regulation of transcription, DNA-dependent	GO:0046983//protein dimerization activity;GO:0003700//sequence-specific DNA binding transcription factor activity	GO:0005634//nucleus
CL1043.Contig5_All	1200	1180	32.8492	400	10.5681	32	0.9131	gi|567211873|ref|XP_006410469.1|	429.5	4e-150	hypothetical protein EUTSA_v10017143mg [Eutrema salsugineum] >gi|557111638|gb|ESQ51922.1| hypothetical protein EUTSA_v10017143mg [Eutrema salsugineum]	gi|312282512|dbj|AK353036.1|	955	0	Thellungiella halophila mRNA, complete cds, clone: RTFL01-09-P05	sp|Q38831|IAA13_ARATH	423	1e-149	Auxin-responsive protein IAA13 OS=Arabidopsis thaliana GN=IAA13 PE=1 SV=2	--	--	--	--	--	K14484	1e-115	338	aly:ARALYDRAFT_470436	auxin-responsive protein IAA	GO:0009086//methionine biosynthetic process;GO:0048364//root development;GO:0009880//embryonic pattern specification;GO:0009734//auxin mediated signaling pathway;GO:0010051//xylem and phloem pattern formation;GO:0000394//RNA splicing, via endonucleolytic cleavage and ligation;GO:0045892//negative regulation of transcription, DNA-dependent	GO:0046983//protein dimerization activity;GO:0003700//sequence-specific DNA binding transcription factor activity	GO:0005634//nucleus
CL1043.Contig6_All	1185	472	13.306	650	17.3905	182	5.2591	gi|567218598|ref|XP_006412928.1|	392.1	1e-135	hypothetical protein EUTSA_v10026085mg [Eutrema salsugineum] >gi|312282573|dbj|BAJ34152.1| unnamed protein product [Thellungiella halophila] >gi|557114098|gb|ESQ54381.1| hypothetical protein EUTSA_v10026085mg [Eutrema salsugineum]	gi|312282572|dbj|AK353066.1|	747	0	Thellungiella halophila mRNA, complete cds, clone: RTFL01-16-K14	sp|Q38829|IAA11_ARATH	375	6e-131	Auxin-responsive protein IAA11 OS=Arabidopsis thaliana GN=IAA11 PE=1 SV=1	--	--	--	--	--	K14484	2e-47	162	aly:ARALYDRAFT_470436	auxin-responsive protein IAA	GO:0009734//auxin mediated signaling pathway;GO:0006355//regulation of transcription, DNA-dependent;GO:0010583//response to cyclopentenone	GO:0046983//protein dimerization activity;GO:0003700//sequence-specific DNA binding transcription factor activity	GO:0009506//plasmodesma;GO:0005634//nucleus
CL1043.Contig7_All	416	122	9.797	86	6.5543	6	0.4939	gi|567211873|ref|XP_006410469.1|	105.1	7e-27	hypothetical protein EUTSA_v10017143mg [Eutrema salsugineum] >gi|557111638|gb|ESQ51922.1| hypothetical protein EUTSA_v10017143mg [Eutrema salsugineum]	gi|312282512|dbj|AK353036.1|	270	1e-69	Thellungiella halophila mRNA, complete cds, clone: RTFL01-09-P05	sp|Q38831|IAA13_ARATH	98.2	5e-26	Auxin-responsive protein IAA13 OS=Arabidopsis thaliana GN=IAA13 PE=1 SV=2	--	--	--	--	--	K14484	8e-22	88.2	aly:ARALYDRAFT_470436	auxin-responsive protein IAA	GO:0009086//methionine biosynthetic process;GO:0048364//root development;GO:0009880//embryonic pattern specification;GO:0009734//auxin mediated signaling pathway;GO:0010051//xylem and phloem pattern formation;GO:0000394//RNA splicing, via endonucleolytic cleavage and ligation;GO:0045892//negative regulation of transcription, DNA-dependent	GO:0046983//protein dimerization activity;GO:0003700//sequence-specific DNA binding transcription factor activity	GO:0005634//nucleus
CL1043.Contig8_All	587	6	0.3415	14	0.7562	4	0.2333	gi|567218598|ref|XP_006412928.1|	297.7	1e-101	hypothetical protein EUTSA_v10026085mg [Eutrema salsugineum] >gi|312282573|dbj|BAJ34152.1| unnamed protein product [Thellungiella halophila] >gi|557114098|gb|ESQ54381.1| hypothetical protein EUTSA_v10026085mg [Eutrema salsugineum]	gi|297803209|ref|XM_002869443.1|	446	1e-122	Arabidopsis lyrata subsp. lyrata indoleacetic acid-induced protein 11 (IAA11), mRNA	sp|Q38829|IAA11_ARATH	291	9e-101	Auxin-responsive protein IAA11 OS=Arabidopsis thaliana GN=IAA11 PE=1 SV=1	--	--	--	--	--	K14484	2e-44	148	aly:ARALYDRAFT_470436	auxin-responsive protein IAA	GO:0009734//auxin mediated signaling pathway;GO:0006355//regulation of transcription, DNA-dependent;GO:0010583//response to cyclopentenone	GO:0046983//protein dimerization activity;GO:0003700//sequence-specific DNA binding transcription factor activity	GO:0009506//plasmodesma;GO:0005634//nucleus
CL1044.Contig1_All	821	41	1.6683	26	1.004	24	1.001	gi|15241702|ref|NP_198167.1|	330.1	2e-112	uncharacterized protein [Arabidopsis thaliana] >gi|19699077|gb|AAL90906.1| AT5g28150/T24G3_80 [Arabidopsis thaliana] >gi|23308357|gb|AAN18148.1| At5g28150/T24G3_80 [Arabidopsis thaliana] >gi|332006393|gb|AED93776.1| uncharacterized protein AT5G28150 [Arabidopsis thaliana]	gi|332002898|gb|CP002688.1|	579	1e-162	Arabidopsis thaliana chromosome 5, complete sequence	--	--	--	--	--	--	--	--	--	--	--	--	--	--	-	-	GO:0005634//nucleus
CL1044.Contig2_All	782	44	1.8796	18	0.7298	18	0.7882	gi|15241702|ref|NP_198167.1|	330.1	1e-112	uncharacterized protein [Arabidopsis thaliana] >gi|19699077|gb|AAL90906.1| AT5g28150/T24G3_80 [Arabidopsis thaliana] >gi|23308357|gb|AAN18148.1| At5g28150/T24G3_80 [Arabidopsis thaliana] >gi|332006393|gb|AED93776.1| uncharacterized protein AT5G28150 [Arabidopsis thaliana]	gi|332002898|gb|CP002688.1|	579	1e-162	Arabidopsis thaliana chromosome 5, complete sequence	--	--	--	--	--	--	--	--	--	--	--	--	--	--	-	-	GO:0005634//nucleus
CL1045.Contig1_All	2125	47	0.7389	621	9.2651	48	0.7735	gi|567201622|ref|XP_006407754.1|	870.9	0	hypothetical protein EUTSA_v10020370mg [Eutrema salsugineum] >gi|557108900|gb|ESQ49207.1| hypothetical protein EUTSA_v10020370mg [Eutrema salsugineum]	gi|18398192|ref|NM_111700.1|	831	0	Arabidopsis thaliana phototropic-responsive NPH3 family protein mRNA, complete cds	sp|Q9C9Z7|Y3857_ARATH	719	0	BTB/POZ domain-containing protein At3g08570 OS=Arabidopsis thaliana GN=At3g08570 PE=2 SV=2	--	--	--	--	--	--	--	--	--	--	GO:0009416//response to light stimulus	GO:0004871//signal transducer activity	GO:0009507//chloroplast
CL1045.Contig2_All	1996	543	9.0879	560	8.895	56	0.9607	gi|565479184|ref|XP_006297232.1|	963.4	0	hypothetical protein CARUB_v10013236mg [Capsella rubella] >gi|482565941|gb|EOA30130.1| hypothetical protein CARUB_v10013236mg [Capsella rubella]	gi|240255302|ref|NM_111691.4|	767	0	Arabidopsis thaliana phototropic-responsive NPH3 family protein mRNA, complete cds	sp|Q9C9Z7|Y3857_ARATH	947	0	BTB/POZ domain-containing protein At3g08570 OS=Arabidopsis thaliana GN=At3g08570 PE=2 SV=2	--	--	--	--	--	--	--	--	--	--	GO:0009416//response to light stimulus	GO:0004871//signal transducer activity	-
CL1046.Contig1_All	916	56	2.0423	34	1.1768	35	1.3084	gi|567123724|ref|XP_006390983.1|	366.3	2e-127	hypothetical protein EUTSA_v10019150mg [Eutrema salsugineum] >gi|567123728|ref|XP_006390984.1| hypothetical protein EUTSA_v10019150mg [Eutrema salsugineum] >gi|567123731|ref|XP_006390985.1| hypothetical protein EUTSA_v10019150mg [Eutrema salsugineum] >gi|557087417|gb|ESQ28269.1| hypothetical protein EUTSA_v10019150mg [Eutrema salsugineum] >gi|557087418|gb|ESQ28270.1| hypothetical protein EUTSA_v1…	gi|30697900|ref|NM_105636.2|	644	0	Arabidopsis thaliana Mog1/PsbP/DUF1795-like photosystem II reaction center PsbP family protein mRNA, complete cds	--	--	--	--	--	--	--	--	--	--	--	--	--	--	-	-	-
CL1046.Contig2_All	877	50	1.9046	32	1.1568	28	1.0932	gi|567123724|ref|XP_006390983.1|	365.5	2e-127	hypothetical protein EUTSA_v10019150mg [Eutrema salsugineum] >gi|567123728|ref|XP_006390984.1| hypothetical protein EUTSA_v10019150mg [Eutrema salsugineum] >gi|567123731|ref|XP_006390985.1| hypothetical protein EUTSA_v10019150mg [Eutrema salsugineum] >gi|557087417|gb|ESQ28269.1| hypothetical protein EUTSA_v10019150mg [Eutrema salsugineum] >gi|557087418|gb|ESQ28270.1| hypothetical protein EUTSA_v1…	gi|30697900|ref|NM_105636.2|	652	0	Arabidopsis thaliana Mog1/PsbP/DUF1795-like photosystem II reaction center PsbP family protein mRNA, complete cds	--	--	--	--	--	--	--	--	--	--	--	--	--	--	-	-	-
CL1046.Contig3_All	761	0	0	0	0	0	0	gi|567123724|ref|XP_006390983.1|	365.9	4e-128	hypothetical protein EUTSA_v10019150mg [Eutrema salsugineum] >gi|567123728|ref|XP_006390984.1| hypothetical protein EUTSA_v10019150mg [Eutrema salsugineum] >gi|567123731|ref|XP_006390985.1| hypothetical protein EUTSA_v10019150mg [Eutrema salsugineum] >gi|557087417|gb|ESQ28269.1| hypothetical protein EUTSA_v10019150mg [Eutrema salsugineum] >gi|557087418|gb|ESQ28270.1| hypothetical protein EUTSA_v1…	gi|30697900|ref|NM_105636.2|	656	0	Arabidopsis thaliana Mog1/PsbP/DUF1795-like photosystem II reaction center PsbP family protein mRNA, complete cds	--	--	--	--	--	--	--	--	--	--	--	--	--	--	-	-	-
CL1046.Contig4_All	835	221	8.8416	256	9.7201	80	3.2807	gi|567123724|ref|XP_006390983.1|	343.2	1e-118	hypothetical protein EUTSA_v10019150mg [Eutrema salsugineum] >gi|567123728|ref|XP_006390984.1| hypothetical protein EUTSA_v10019150mg [Eutrema salsugineum] >gi|567123731|ref|XP_006390985.1| hypothetical protein EUTSA_v10019150mg [Eutrema salsugineum] >gi|557087417|gb|ESQ28269.1| hypothetical protein EUTSA_v10019150mg [Eutrema salsugineum] >gi|557087418|gb|ESQ28270.1| hypothetical protein EUTSA_v1…	gi|30697900|ref|NM_105636.2|	579	1e-162	Arabidopsis thaliana Mog1/PsbP/DUF1795-like photosystem II reaction center PsbP family protein mRNA, complete cds	--	--	--	--	--	--	--	--	--	--	--	--	--	--	-	-	-
CL1047.Contig1_All	382	37	3.2357	62	5.1457	16	1.4342	gi|567167034|ref|XP_006397997.1|	182.6	1e-52	hypothetical protein EUTSA_v10001278mg [Eutrema salsugineum] >gi|557099070|gb|ESQ39450.1| hypothetical protein EUTSA_v10001278mg [Eutrema salsugineum]	gi|334184982|ref|NM_130373.6|	274	7e-71	Arabidopsis thaliana uncharacterized protein mRNA, complete cds	--	--	--	--	--	--	--	--	--	--	--	--	--	--	GO:0034220//ion transmembrane transport	GO:0008381//mechanically-gated ion channel activity	GO:0016021//integral to membrane;GO:0009507//chloroplast
CL1047.Contig2_All	7676	2651	11.5372	2112	8.7232	1081	4.8222	gi|567167034|ref|XP_006397997.1|	4786.9	0	hypothetical protein EUTSA_v10001278mg [Eutrema salsugineum] >gi|557099070|gb|ESQ39450.1| hypothetical protein EUTSA_v10001278mg [Eutrema salsugineum]	gi|334184982|ref|NM_130373.6|	8964	0	Arabidopsis thaliana uncharacterized protein mRNA, complete cds	--	--	--	--	--	--	--	--	--	--	--	--	--	--	GO:0034220//ion transmembrane transport	GO:0008381//mechanically-gated ion channel activity	GO:0016021//integral to membrane;GO:0009507//chloroplast
CL1047.Contig3_All	358	50	4.6656	63	5.5792	26	2.4868	gi|567167034|ref|XP_006397997.1|	222.6	7e-67	hypothetical protein EUTSA_v10001278mg [Eutrema salsugineum] >gi|557099070|gb|ESQ39450.1| hypothetical protein EUTSA_v10001278mg [Eutrema salsugineum]	gi|199580328|gb|AC189634.2|	615	1e-173	Brassica rapa subsp. pekinensis clone KBrS004I08, complete sequence	--	--	--	--	--	--	--	--	--	--	--	--	--	--	GO:0034220//ion transmembrane transport	GO:0008381//mechanically-gated ion channel activity	GO:0016021//integral to membrane;GO:0009507//chloroplast
CL1048.Contig1_All	4185	730	5.8271	380	2.8788	372	3.0437	gi|334187266|ref|NP_195548.6|	2291.5	0	Patched family protein [Arabidopsis thaliana] >gi|332661516|gb|AEE86916.1| Patched family protein [Arabidopsis thaliana]	gi|334187265|ref|NM_119997.6|	4817	0	Arabidopsis thaliana Patched family protein mRNA, complete cds	--	--	--	--	--	--	--	--	--	K12385	0	2257	ath:AT4G38350	Niemann-Pick C1 protein	GO:0030301//cholesterol transport;GO:0007165//signal transduction	GO:0008158//hedgehog receptor activity	GO:0005774//vacuolar membrane;GO:0016021//integral to membrane;GO:0009507//chloroplast
CL1048.Contig2_All	1283	9	0.2343	4	0.0988	0	0	gi|565440939|ref|XP_006283009.1|	614.4	0	hypothetical protein CARUB_v10003998mg [Capsella rubella] >gi|482551714|gb|EOA15907.1| hypothetical protein CARUB_v10003998mg [Capsella rubella]	gi|334187267|ref|NM_001204024.1|	987	0	Arabidopsis thaliana Patched family protein mRNA, complete cds	--	--	--	--	--	--	--	--	--	K12385	0	574	ath:AT4G38350	Niemann-Pick C1 protein	GO:0030301//cholesterol transport;GO:0007165//signal transduction	GO:0008158//hedgehog receptor activity	GO:0005774//vacuolar membrane;GO:0016021//integral to membrane;GO:0009507//chloroplast
CL1048.Contig3_All	3593	7	0.0651	4	0.0353	1	0.0095	gi|334187266|ref|NP_195548.6|	2031.9	0	Patched family protein [Arabidopsis thaliana] >gi|332661516|gb|AEE86916.1| Patched family protein [Arabidopsis thaliana]	gi|334187265|ref|NM_119997.6|	4177	0	Arabidopsis thaliana Patched family protein mRNA, complete cds	--	--	--	--	--	--	--	--	--	K12385	0	1997	ath:AT4G38350	Niemann-Pick C1 protein	GO:0030301//cholesterol transport;GO:0007165//signal transduction	GO:0008158//hedgehog receptor activity	GO:0005774//vacuolar membrane;GO:0016021//integral to membrane;GO:0009507//chloroplast
CL1049.Contig1_All	1229	20	0.5436	2	0.0516	2	0.0557	gi|42571895|ref|NP_974038.1|	450.3	1e-156	pyridoxal-5&apos;-phosphate-dependent enzyme family protein [Arabidopsis thaliana] >gi|332195193|gb|AEE33314.1| pyridoxal-5&apos;-phosphate-dependent enzyme family protein [Arabidopsis thaliana]	gi|145336808|ref|NM_104465.3|	844	0	Arabidopsis thaliana pyridoxal-5'-phosphate-dependent enzyme family protein mRNA, complete cds	sp|O23735|CYSK2_BRAJU	108	1e-26	Cysteine synthase OS=Brassica juncea PE=2 SV=1	sll0712	186	4e-55	COG0031	Cysteine synthase	K01738	6e-157	450	ath:AT1G55880	cysteine synthase A [EC:2.5.1.47]	GO:0048573//photoperiodism, flowering;GO:0006535//cysteine biosynthetic process from serine	GO:0016829//lyase activity	-
CL1049.Contig2_All	1019	91	2.9833	53	1.649	44	1.4786	gi|255563512|ref|XP_002522758.1|	100.9	1e-22	cysteine synthase, putative [Ricinus communis] >gi|223537996|gb|EEF39609.1| cysteine synthase, putative [Ricinus communis]	gi|332189094|gb|CP002684.1|	172	5e-40	Arabidopsis thaliana chromosome 1, complete sequence	--	--	--	--	SPAC3A12.17c	56.6	2e-08	COG0031	Cysteine synthase	K01738	6e-24	100	rcu:RCOM_0522230	cysteine synthase A [EC:2.5.1.47]	GO:0048573//photoperiodism, flowering;GO:0006520//cellular amino acid metabolic process	GO:0016829//lyase activity	-
CL1049.Contig3_All	1783	290	5.4334	132	2.3471	119	2.2854	gi|15222794|ref|NP_175984.1|	752.3	0	pyridoxal-5&apos;-phosphate-dependent enzyme family protein [Arabidopsis thaliana] >gi|46518441|gb|AAS99702.1| At1g55880 [Arabidopsis thaliana] >gi|332195192|gb|AEE33313.1| pyridoxal-5&apos;-phosphate-dependent enzyme family protein [Arabidopsis thaliana]	gi|145336808|ref|NM_104465.3|	1487	0	Arabidopsis thaliana pyridoxal-5'-phosphate-dependent enzyme family protein mRNA, complete cds	sp|F4K5T2|CGL_ARATH	152	3e-41	Bifunctional cystathionine gamma-lyase/cysteine synthase OS=Arabidopsis thaliana GN=DES1 PE=1 SV=1	SPAC3A12.17c	346	7e-114	COG0031	Cysteine synthase	K01738	0	752	ath:AT1G55880	cysteine synthase A [EC:2.5.1.47]	GO:0048573//photoperiodism, flowering;GO:0006535//cysteine biosynthetic process from serine	GO:0016829//lyase activity	-
CL1049.Contig4_All	1660	122	2.4551	24	0.4584	32	0.6601	gi|15222794|ref|NP_175984.1|	728	0	pyridoxal-5&apos;-phosphate-dependent enzyme family protein [Arabidopsis thaliana] >gi|46518441|gb|AAS99702.1| At1g55880 [Arabidopsis thaliana] >gi|332195192|gb|AEE33313.1| pyridoxal-5&apos;-phosphate-dependent enzyme family protein [Arabidopsis thaliana]	gi|145336808|ref|NM_104465.3|	1473	0	Arabidopsis thaliana pyridoxal-5'-phosphate-dependent enzyme family protein mRNA, complete cds	sp|F4K5T2|CGL_ARATH	153	5e-42	Bifunctional cystathionine gamma-lyase/cysteine synthase OS=Arabidopsis thaliana GN=DES1 PE=1 SV=1	SPAC3A12.17c	343	3e-113	COG0031	Cysteine synthase	K01738	0	728	ath:AT1G55880	cysteine synthase A [EC:2.5.1.47]	GO:0048573//photoperiodism, flowering;GO:0006535//cysteine biosynthetic process from serine	GO:0016829//lyase activity	-
CL105.Contig1_All	1009	752	24.8972	299	9.395	393	13.3371	gi|385271603|gb|AFI56995.1|	449.1	6e-159	NAC5 [Brassica napus]	gi|385271602|gb|JF957837.1|	753	0	Brassica napus NAC5 mRNA, complete cds	sp|O49255|NAC29_ARATH	185	7e-57	NAC transcription factor 29 OS=Arabidopsis thaliana GN=NAC029 PE=2 SV=1	--	--	--	--	--	--	--	--	--	--	GO:0010363//regulation of plant-type hypersensitive response;GO:0009651//response to salt stress;GO:0006612//protein targeting to membrane;GO:0009741//response to brassinosteroid stimulus;GO:0045892//negative regulation of transcription, DNA-dependent;GO:0010150//leaf senescence;GO:0009963//positive regulation of flavonoid biosynthetic process;GO:0009737//response to abscisic acid stimulus;GO:001…	GO:0005515//protein binding;GO:0003677//DNA binding;GO:0003700//sequence-specific DNA binding transcription factor activity	GO:0005634//nucleus
CL105.Contig2_All	1002	34	1.1335	4	0.1266	4	0.1367	gi|385271603|gb|AFI56995.1|	470.7	1e-167	NAC5 [Brassica napus]	gi|312282074|dbj|AK352817.1|	981	0	Thellungiella halophila mRNA, complete cds, clone: RTFL01-04-E01	sp|O49255|NAC29_ARATH	187	1e-57	NAC transcription factor 29 OS=Arabidopsis thaliana GN=NAC029 PE=2 SV=1	--	--	--	--	--	--	--	--	--	--	GO:0010363//regulation of plant-type hypersensitive response;GO:0009651//response to salt stress;GO:0006612//protein targeting to membrane;GO:0009741//response to brassinosteroid stimulus;GO:0045892//negative regulation of transcription, DNA-dependent;GO:0010150//leaf senescence;GO:0009963//positive regulation of flavonoid biosynthetic process;GO:0009737//response to abscisic acid stimulus;GO:001…	GO:0005515//protein binding;GO:0003677//DNA binding;GO:0003700//sequence-specific DNA binding transcription factor activity	GO:0005634//nucleus
CL105.Contig3_All	1013	0	0	0	0	0	0	gi|385271603|gb|AFI56995.1|	470.7	2e-167	NAC5 [Brassica napus]	gi|312282074|dbj|AK352817.1|	1015	0	Thellungiella halophila mRNA, complete cds, clone: RTFL01-04-E01	sp|O49255|NAC29_ARATH	187	1e-57	NAC transcription factor 29 OS=Arabidopsis thaliana GN=NAC029 PE=2 SV=1	--	--	--	--	--	--	--	--	--	--	GO:0010363//regulation of plant-type hypersensitive response;GO:0009651//response to salt stress;GO:0006612//protein targeting to membrane;GO:0009741//response to brassinosteroid stimulus;GO:0045892//negative regulation of transcription, DNA-dependent;GO:0010150//leaf senescence;GO:0009963//positive regulation of flavonoid biosynthetic process;GO:0009737//response to abscisic acid stimulus;GO:001…	GO:0005515//protein binding;GO:0003677//DNA binding;GO:0003700//sequence-specific DNA binding transcription factor activity	GO:0005634//nucleus
CL105.Contig4_All	983	9	0.3059	2	0.0645	0	0	gi|385271603|gb|AFI56995.1|	441.8	3e-156	NAC5 [Brassica napus]	gi|385271602|gb|JF957837.1|	690	0	Brassica napus NAC5 mRNA, complete cds	sp|O49255|NAC29_ARATH	187	7e-58	NAC transcription factor 29 OS=Arabidopsis thaliana GN=NAC029 PE=2 SV=1	--	--	--	--	--	--	--	--	--	--	GO:0010363//regulation of plant-type hypersensitive response;GO:0009651//response to salt stress;GO:0006612//protein targeting to membrane;GO:0009741//response to brassinosteroid stimulus;GO:0045892//negative regulation of transcription, DNA-dependent;GO:0010150//leaf senescence;GO:0009963//positive regulation of flavonoid biosynthetic process;GO:0009737//response to abscisic acid stimulus;GO:001…	GO:0005515//protein binding;GO:0003677//DNA binding;GO:0003700//sequence-specific DNA binding transcription factor activity	GO:0005634//nucleus
CL105.Contig5_All	1045	1378	44.0512	417	12.6514	149	4.8823	gi|385271603|gb|AFI56995.1|	489.6	1e-174	NAC5 [Brassica napus]	gi|385271602|gb|JF957837.1|	1170	0	Brassica napus NAC5 mRNA, complete cds	sp|O49255|NAC29_ARATH	189	4e-58	NAC transcription factor 29 OS=Arabidopsis thaliana GN=NAC029 PE=2 SV=1	--	--	--	--	--	--	--	--	--	--	GO:0010363//regulation of plant-type hypersensitive response;GO:0009651//response to salt stress;GO:0006612//protein targeting to membrane;GO:0009741//response to brassinosteroid stimulus;GO:0045892//negative regulation of transcription, DNA-dependent;GO:0010150//leaf senescence;GO:0009963//positive regulation of flavonoid biosynthetic process;GO:0009737//response to abscisic acid stimulus;GO:001…	GO:0005515//protein binding;GO:0003677//DNA binding;GO:0003700//sequence-specific DNA binding transcription factor activity	GO:0005634//nucleus
CL1050.Contig1_All	1893	0	0	0	0	0	0	gi|567206397|ref|XP_006409028.1|	936.4	0	hypothetical protein EUTSA_v10001971mg [Eutrema salsugineum] >gi|557110184|gb|ESQ50481.1| hypothetical protein EUTSA_v10001971mg [Eutrema salsugineum]	gi|222424358|dbj|AK317470.1|	1711	0	Arabidopsis thaliana AT2G20900 mRNA, complete cds, clone: RAFL24-08-C14	sp|Q39017|DGK1_ARATH	122	7e-29	Diacylglycerol kinase 1 OS=Arabidopsis thaliana GN=DGK1 PE=1 SV=2	--	--	--	--	--	K00901	0	523	ppp:PHYPADRAFT_106363	diacylglycerol kinase [EC:2.7.1.107]	GO:0009723//response to ethylene stimulus;GO:0016310//phosphorylation;GO:0007205//protein kinase C-activating G-protein coupled receptor signaling pathway	GO:0003951//NAD+ kinase activity;GO:0004143//diacylglycerol kinase activity	-
CL1050.Contig2_All	1843	4	0.0725	0	0	0	0	gi|567206397|ref|XP_006409028.1|	936.4	0	hypothetical protein EUTSA_v10001971mg [Eutrema salsugineum] >gi|557110184|gb|ESQ50481.1| hypothetical protein EUTSA_v10001971mg [Eutrema salsugineum]	gi|222424358|dbj|AK317470.1|	1703	0	Arabidopsis thaliana AT2G20900 mRNA, complete cds, clone: RAFL24-08-C14	sp|Q39017|DGK1_ARATH	122	6e-29	Diacylglycerol kinase 1 OS=Arabidopsis thaliana GN=DGK1 PE=1 SV=2	--	--	--	--	--	K00901	0	523	ppp:PHYPADRAFT_106363	diacylglycerol kinase [EC:2.7.1.107]	GO:0009723//response to ethylene stimulus;GO:0016310//phosphorylation;GO:0007205//protein kinase C-activating G-protein coupled receptor signaling pathway	GO:0003951//NAD+ kinase activity;GO:0004143//diacylglycerol kinase activity	-
CL1050.Contig3_All	2106	0	0	0	0	0	0	gi|567206397|ref|XP_006409028.1|	923.3	0	hypothetical protein EUTSA_v10001971mg [Eutrema salsugineum] >gi|557110184|gb|ESQ50481.1| hypothetical protein EUTSA_v10001971mg [Eutrema salsugineum]	gi|222424358|dbj|AK317470.1|	1667	0	Arabidopsis thaliana AT2G20900 mRNA, complete cds, clone: RAFL24-08-C14	sp|Q9SKT0|THF1_ARATH	129	6e-33	Protein THYLAKOID FORMATION 1, chloroplastic OS=Arabidopsis thaliana GN=THF1 PE=1 SV=1	--	--	--	--	--	K00901	2e-180	523	ppp:PHYPADRAFT_106363	diacylglycerol kinase [EC:2.7.1.107]	GO:0009723//response to ethylene stimulus;GO:0016310//phosphorylation;GO:0007205//protein kinase C-activating G-protein coupled receptor signaling pathway	GO:0003951//NAD+ kinase activity;GO:0004143//diacylglycerol kinase activity	-
CL1050.Contig4_All	2949	0	0	0	0	0	0	gi|567206397|ref|XP_006409028.1|	923.3	0	hypothetical protein EUTSA_v10001971mg [Eutrema salsugineum] >gi|557110184|gb|ESQ50481.1| hypothetical protein EUTSA_v10001971mg [Eutrema salsugineum]	gi|222424358|dbj|AK317470.1|	1667	0	Arabidopsis thaliana AT2G20900 mRNA, complete cds, clone: RAFL24-08-C14	sp|Q9SKT0|THF1_ARATH	431	4e-144	Protein THYLAKOID FORMATION 1, chloroplastic OS=Arabidopsis thaliana GN=THF1 PE=1 SV=1	--	--	--	--	--	K00901	1e-176	523	ppp:PHYPADRAFT_106363	diacylglycerol kinase [EC:2.7.1.107]	GO:0009723//response to ethylene stimulus;GO:0016310//phosphorylation;GO:0007205//protein kinase C-activating G-protein coupled receptor signaling pathway	GO:0003951//NAD+ kinase activity;GO:0004143//diacylglycerol kinase activity	-
CL1050.Contig5_All	3004	0	0	0	0	0	0	gi|567206397|ref|XP_006409028.1|	923.3	0	hypothetical protein EUTSA_v10001971mg [Eutrema salsugineum] >gi|557110184|gb|ESQ50481.1| hypothetical protein EUTSA_v10001971mg [Eutrema salsugineum]	gi|222424358|dbj|AK317470.1|	1667	0	Arabidopsis thaliana AT2G20900 mRNA, complete cds, clone: RAFL24-08-C14	sp|Q9SKT0|THF1_ARATH	431	6e-144	Protein THYLAKOID FORMATION 1, chloroplastic OS=Arabidopsis thaliana GN=THF1 PE=1 SV=1	--	--	--	--	--	K00901	2e-176	523	ppp:PHYPADRAFT_106363	diacylglycerol kinase [EC:2.7.1.107]	GO:0009723//response to ethylene stimulus;GO:0016310//phosphorylation;GO:0007205//protein kinase C-activating G-protein coupled receptor signaling pathway	GO:0003951//NAD+ kinase activity;GO:0004143//diacylglycerol kinase activity	-
CL1050.Contig6_All	2161	0	0	0	0	0	0	gi|567206397|ref|XP_006409028.1|	923.3	0	hypothetical protein EUTSA_v10001971mg [Eutrema salsugineum] >gi|557110184|gb|ESQ50481.1| hypothetical protein EUTSA_v10001971mg [Eutrema salsugineum]	gi|222424358|dbj|AK317470.1|	1667	0	Arabidopsis thaliana AT2G20900 mRNA, complete cds, clone: RAFL24-08-C14	sp|Q9SKT0|THF1_ARATH	129	6e-33	Protein THYLAKOID FORMATION 1, chloroplastic OS=Arabidopsis thaliana GN=THF1 PE=1 SV=1	--	--	--	--	--	K00901	4e-180	523	ppp:PHYPADRAFT_106363	diacylglycerol kinase [EC:2.7.1.107]	GO:0009723//response to ethylene stimulus;GO:0016310//phosphorylation;GO:0007205//protein kinase C-activating G-protein coupled receptor signaling pathway	GO:0003951//NAD+ kinase activity;GO:0004143//diacylglycerol kinase activity	-
CL1050.Contig7_All	2962	625	7.0489	1856	19.866	6289	72.7034	gi|567206397|ref|XP_006409028.1|	923.3	0	hypothetical protein EUTSA_v10001971mg [Eutrema salsugineum] >gi|557110184|gb|ESQ50481.1| hypothetical protein EUTSA_v10001971mg [Eutrema salsugineum]	gi|222424358|dbj|AK317470.1|	1667	0	Arabidopsis thaliana AT2G20900 mRNA, complete cds, clone: RAFL24-08-C14	sp|Q9SKT0|THF1_ARATH	484	8e-165	Protein THYLAKOID FORMATION 1, chloroplastic OS=Arabidopsis thaliana GN=THF1 PE=1 SV=1	--	--	--	--	--	K00901	1e-176	523	ppp:PHYPADRAFT_106363	diacylglycerol kinase [EC:2.7.1.107]	GO:0009723//response to ethylene stimulus;GO:0016310//phosphorylation;GO:0007205//protein kinase C-activating G-protein coupled receptor signaling pathway	GO:0003951//NAD+ kinase activity;GO:0004143//diacylglycerol kinase activity	-
CL1051.Contig1_All	1130	387	11.4408	499	14.0004	88	2.6666	gi|567205871|ref|XP_006408875.1|	539.3	0	hypothetical protein EUTSA_v10002073mg [Eutrema salsugineum] >gi|557110031|gb|ESQ50328.1| hypothetical protein EUTSA_v10002073mg [Eutrema salsugineum]	gi|145360107|ref|NM_127516.4|	971	0	Arabidopsis thaliana tetraspanin2 mRNA, complete cds	sp|Q9ZUN5|TET2_ARATH	533	0	Tetraspanin-2 OS=Arabidopsis thaliana GN=TET2 PE=2 SV=1	--	--	--	--	--	--	--	--	--	--	GO:0007568//aging	-	GO:0016021//integral to membrane;GO:0009507//chloroplast
CL1051.Contig2_All	789	237	10.0345	143	5.7462	18	0.7812	gi|567205871|ref|XP_006408875.1|	327.4	9e-112	hypothetical protein EUTSA_v10002073mg [Eutrema salsugineum] >gi|557110031|gb|ESQ50328.1| hypothetical protein EUTSA_v10002073mg [Eutrema salsugineum]	gi|145360107|ref|NM_127516.4|	547	1e-153	Arabidopsis thaliana tetraspanin2 mRNA, complete cds	sp|Q9ZUN5|TET2_ARATH	320	8e-111	Tetraspanin-2 OS=Arabidopsis thaliana GN=TET2 PE=2 SV=1	--	--	--	--	--	--	--	--	--	--	GO:0007568//aging	-	GO:0016021//integral to membrane;GO:0009507//chloroplast
CL1052.Contig1_All	833	29	1.163	1167	44.4165	1887	77.5685	gi|567131326|ref|XP_006392665.1|	302.4	8e-103	hypothetical protein EUTSA_v10011802mg [Eutrema salsugineum] >gi|557089243|gb|ESQ29951.1| hypothetical protein EUTSA_v10011802mg [Eutrema salsugineum]	gi|199580291|gb|AC189592.2|	597	1e-168	Brassica rapa subsp. pekinensis clone KBrH013K13, complete sequence	sp|Q9C7F7|UGPI5_ARATH	57.4	7e-10	Uncharacterized GPI-anchored protein At1g27950 OS=Arabidopsis thaliana GN=At1g27950 PE=1 SV=1	--	--	--	--	--	--	--	--	--	--	GO:0000038//very long-chain fatty acid metabolic process;GO:0042335//cuticle development;GO:0006869//lipid transport;GO:0006508//proteolysis;GO:0009664//plant-type cell wall organization;GO:0009832//plant-type cell wall biogenesis;GO:0019344//cysteine biosynthetic process	GO:0008233//peptidase activity;GO:0008289//lipid binding	GO:0005634//nucleus;GO:0005886//plasma membrane;GO:0031225//anchored to membrane
CL1052.Contig2_All	575	70	4.0668	66	3.6391	118	7.027	gi|567131326|ref|XP_006392665.1|	294.7	3e-101	hypothetical protein EUTSA_v10011802mg [Eutrema salsugineum] >gi|557089243|gb|ESQ29951.1| hypothetical protein EUTSA_v10011802mg [Eutrema salsugineum]	gi|199580291|gb|AC189592.2|	402	1e-109	Brassica rapa subsp. pekinensis clone KBrH013K13, complete sequence	sp|Q9C7F7|UGPI5_ARATH	60.1	2e-11	Uncharacterized GPI-anchored protein At1g27950 OS=Arabidopsis thaliana GN=At1g27950 PE=1 SV=1	--	--	--	--	--	--	--	--	--	--	GO:0000038//very long-chain fatty acid metabolic process;GO:0042335//cuticle development;GO:0006869//lipid transport;GO:0006508//proteolysis;GO:0009664//plant-type cell wall organization;GO:0009832//plant-type cell wall biogenesis;GO:0019344//cysteine biosynthetic process	GO:0008233//peptidase activity;GO:0008289//lipid binding	GO:0005634//nucleus;GO:0005886//plasma membrane;GO:0031225//anchored to membrane
CL1053.Contig1_All	1964	35	0.5953	48	0.7749	47	0.8194	gi|565458814|ref|XP_006287406.1|	1075.8	0	hypothetical protein CARUB_v10000612mg [Capsella rubella] >gi|482556112|gb|EOA20304.1| hypothetical protein CARUB_v10000612mg [Capsella rubella]	gi|22655203|gb|AY140051.1|	2325	0	Arabidopsis thaliana CTP synthase-like protein (At4g02120) mRNA, complete cds	--	--	--	--	YBL039c	632	0	COG0504	CTP synthase (UTP-ammonia lyase)	K01937	0	1063	aly:ARALYDRAFT_912011	CTP synthase [EC:6.3.4.2]	GO:0006541//glutamine metabolic process;GO:0044210//'de novo' CTP biosynthetic process	GO:0003883//CTP synthase activity;GO:0005524//ATP binding	-
CL1053.Contig2_All	1362	0	0	0	0	0	0	gi|565458814|ref|XP_006287406.1|	747.7	0	hypothetical protein CARUB_v10000612mg [Capsella rubella] >gi|482556112|gb|EOA20304.1| hypothetical protein CARUB_v10000612mg [Capsella rubella]	gi|22655203|gb|AY140051.1|	1600	0	Arabidopsis thaliana CTP synthase-like protein (At4g02120) mRNA, complete cds	--	--	--	--	YBL039c	372	3e-123	COG0504	CTP synthase (UTP-ammonia lyase)	K01937	0	734	aly:ARALYDRAFT_912011	CTP synthase [EC:6.3.4.2]	GO:0006541//glutamine metabolic process;GO:0044210//'de novo' CTP biosynthetic process	GO:0003883//CTP synthase activity;GO:0005524//ATP binding	-
CL1053.Contig3_All	1166	0	0	0	0	0	0	gi|565458814|ref|XP_006287406.1|	655.2	0	hypothetical protein CARUB_v10000612mg [Capsella rubella] >gi|482556112|gb|EOA20304.1| hypothetical protein CARUB_v10000612mg [Capsella rubella]	gi|22655203|gb|AY140051.1|	983	0	Arabidopsis thaliana CTP synthase-like protein (At4g02120) mRNA, complete cds	--	--	--	--	YBL039c	330	6e-108	COG0504	CTP synthase (UTP-ammonia lyase)	K01937	0	643	aly:ARALYDRAFT_912011	CTP synthase [EC:6.3.4.2]	GO:0006541//glutamine metabolic process;GO:0044210//'de novo' CTP biosynthetic process	GO:0003883//CTP synthase activity;GO:0005524//ATP binding	-
CL1053.Contig4_All	1136	0	0	0	0	0	0	gi|565458814|ref|XP_006287406.1|	663.3	0	hypothetical protein CARUB_v10000612mg [Capsella rubella] >gi|482556112|gb|EOA20304.1| hypothetical protein CARUB_v10000612mg [Capsella rubella]	gi|22655203|gb|AY140051.1|	1384	0	Arabidopsis thaliana CTP synthase-like protein (At4g02120) mRNA, complete cds	--	--	--	--	YBL039c	331	1e-108	COG0504	CTP synthase (UTP-ammonia lyase)	K01937	0	651	aly:ARALYDRAFT_912011	CTP synthase [EC:6.3.4.2]	GO:0006541//glutamine metabolic process;GO:0044210//'de novo' CTP biosynthetic process	GO:0003883//CTP synthase activity;GO:0005524//ATP binding	-
CL1053.Contig5_All	1392	0	0	0	0	0	0	gi|565458814|ref|XP_006287406.1|	739.6	0	hypothetical protein CARUB_v10000612mg [Capsella rubella] >gi|482556112|gb|EOA20304.1| hypothetical protein CARUB_v10000612mg [Capsella rubella]	gi|22655203|gb|AY140051.1|	1199	0	Arabidopsis thaliana CTP synthase-like protein (At4g02120) mRNA, complete cds	--	--	--	--	SPAC10F6.03c	372	5e-123	COG0504	CTP synthase (UTP-ammonia lyase)	K01937	0	726	aly:ARALYDRAFT_912011	CTP synthase [EC:6.3.4.2]	GO:0006541//glutamine metabolic process;GO:0044210//'de novo' CTP biosynthetic process	GO:0003883//CTP synthase activity;GO:0005524//ATP binding	-
CL1053.Contig6_All	1720	0	0	0	0	0	0	gi|565458814|ref|XP_006287406.1|	983.4	0	hypothetical protein CARUB_v10000612mg [Capsella rubella] >gi|482556112|gb|EOA20304.1| hypothetical protein CARUB_v10000612mg [Capsella rubella]	gi|22655203|gb|AY140051.1|	1136	0	Arabidopsis thaliana CTP synthase-like protein (At4g02120) mRNA, complete cds	--	--	--	--	YBL039c	590	0	COG0504	CTP synthase (UTP-ammonia lyase)	K01937	0	972	aly:ARALYDRAFT_912011	CTP synthase [EC:6.3.4.2]	GO:0006541//glutamine metabolic process;GO:0044210//'de novo' CTP biosynthetic process	GO:0003883//CTP synthase activity;GO:0005524//ATP binding	-
CL1053.Contig7_All	1690	8	0.1581	0	0	0	0	gi|565458814|ref|XP_006287406.1|	991.5	0	hypothetical protein CARUB_v10000612mg [Capsella rubella] >gi|482556112|gb|EOA20304.1| hypothetical protein CARUB_v10000612mg [Capsella rubella]	gi|22655203|gb|AY140051.1|	2109	0	Arabidopsis thaliana CTP synthase-like protein (At4g02120) mRNA, complete cds	--	--	--	--	YBL039c	592	0	COG0504	CTP synthase (UTP-ammonia lyase)	K01937	0	980	aly:ARALYDRAFT_912011	CTP synthase [EC:6.3.4.2]	GO:0006541//glutamine metabolic process;GO:0044210//'de novo' CTP biosynthetic process	GO:0003883//CTP synthase activity;GO:0005524//ATP binding	-
CL1053.Contig8_All	1946	0	0	0	0	0	0	gi|565458814|ref|XP_006287406.1|	1067.8	0	hypothetical protein CARUB_v10000612mg [Capsella rubella] >gi|482556112|gb|EOA20304.1| hypothetical protein CARUB_v10000612mg [Capsella rubella]	gi|22655203|gb|AY140051.1|	1199	0	Arabidopsis thaliana CTP synthase-like protein (At4g02120) mRNA, complete cds	--	--	--	--	YBL039c	630	0	COG0504	CTP synthase (UTP-ammonia lyase)	K01937	0	1055	aly:ARALYDRAFT_912011	CTP synthase [EC:6.3.4.2]	GO:0006541//glutamine metabolic process;GO:0044210//'de novo' CTP biosynthetic process	GO:0003883//CTP synthase activity;GO:0005524//ATP binding	-
CL1054.Contig1_All	3260	1274	13.055	735	7.1481	263	2.7625	gi|567216702|ref|XP_006411980.1|	1825.1	0	hypothetical protein EUTSA_v10024305mg [Eutrema salsugineum] >gi|557113150|gb|ESQ53433.1| hypothetical protein EUTSA_v10024305mg [Eutrema salsugineum]	gi|240256189|ref|NM_119826.7|	3552	0	Arabidopsis thaliana protein EMBRYO DEFECTIVE 2754 mRNA, complete cds	--	--	--	--	--	--	--	--	--	--	--	--	--	--	GO:0016192//vesicle-mediated transport;GO:0006623//protein targeting to vacuole;GO:0042732//D-xylose metabolic process;GO:0007033//vacuole organization;GO:0050790//regulation of catalytic activity;GO:0009793//embryo development ending in seed dormancy;GO:0006487//protein N-linked glycosylation	GO:0005083//small GTPase regulator activity	GO:0009506//plasmodesma
CL1055.Contig1_All	260	168	21.5854	86	10.4868	19	2.5023	gi|567220512|ref|XP_006413885.1|	131.7	4e-37	hypothetical protein EUTSA_v10025632mg [Eutrema salsugineum] >gi|557115055|gb|ESQ55338.1| hypothetical protein EUTSA_v10025632mg [Eutrema salsugineum]	gi|145361330|ref|NM_179082.2|	103	1e-19	Arabidopsis thaliana uncharacterized protein mRNA, complete cds	--	--	--	--	--	--	--	--	--	--	--	--	--	--	-	-	GO:0005634//nucleus;GO:0005739//mitochondrion
CL1055.Contig2_All	1696	832	16.3879	571	10.674	95	1.918	gi|297804114|ref|XP_002869941.1|	516.5	3e-180	hypothetical protein ARALYDRAFT_914630 [Arabidopsis lyrata subsp. lyrata] >gi|297315777|gb|EFH46200.1| hypothetical protein ARALYDRAFT_914630 [Arabidopsis lyrata subsp. lyrata]	gi|199579945|gb|AC232462.1|	640	1e-180	Brassica rapa subsp. pekinensis clone KBrB021L13, complete sequence	sp|Q9FLQ7|FH20_ARATH	33.5	9e-07	Formin-like protein 20 OS=Arabidopsis thaliana GN=FH20 PE=2 SV=3	--	--	--	--	--	K01115	3e-06	42	vcn:VOLCADRAFT_99471	phospholipase D [EC:3.1.4.4]	-	-	GO:0005634//nucleus;GO:0005739//mitochondrion
CL1055.Contig3_All	1187	47	1.3227	53	1.4156	24	0.6923	gi|567220512|ref|XP_006413885.1|	317	1e-104	hypothetical protein EUTSA_v10025632mg [Eutrema salsugineum] >gi|557115055|gb|ESQ55338.1| hypothetical protein EUTSA_v10025632mg [Eutrema salsugineum]	gi|199579945|gb|AC232462.1|	850	0	Brassica rapa subsp. pekinensis clone KBrB021L13, complete sequence	--	--	--	--	--	--	--	--	--	--	--	--	--	--	-	-	GO:0005634//nucleus;GO:0005739//mitochondrion
CL1055.Contig4_All	1626	629	12.9227	487	9.4957	146	3.0746	gi|297804114|ref|XP_002869941.1|	523.1	0	hypothetical protein ARALYDRAFT_914630 [Arabidopsis lyrata subsp. lyrata] >gi|297315777|gb|EFH46200.1| hypothetical protein ARALYDRAFT_914630 [Arabidopsis lyrata subsp. lyrata]	gi|199579945|gb|AC232462.1|	640	1e-180	Brassica rapa subsp. pekinensis clone KBrB021L13, complete sequence	sp|Q9FLQ7|FH20_ARATH	33.5	8e-07	Formin-like protein 20 OS=Arabidopsis thaliana GN=FH20 PE=2 SV=3	--	--	--	--	--	K01115	3e-06	42	vcn:VOLCADRAFT_99471	phospholipase D [EC:3.1.4.4]	-	-	GO:0005634//nucleus;GO:0005739//mitochondrion
CL1056.Contig1_All	2215	420	6.3343	313	4.4801	126	1.9478	gi|567200139|ref|XP_006407339.1|	1088.6	0	hypothetical protein EUTSA_v10020362mg [Eutrema salsugineum] >gi|557108485|gb|ESQ48792.1| hypothetical protein EUTSA_v10020362mg [Eutrema salsugineum]	gi|30682154|ref|NM_112071.2|	2226	0	Arabidopsis thaliana protein INCREASED TOLERANCE TO NACL mRNA, complete cds	sp|Q9C7A2|Y3236_ARATH	1074	0	Ankyrin repeat-containing protein At3g12360 OS=Arabidopsis thaliana GN=At3g12360 PE=2 SV=1	all2748	100	1e-21	COG0666	FOG: Ankyrin repeat	K06694	6e-16	79.3	pop:POPTR_659236	26S proteasome non-ATPase regulatory subunit 10	GO:0034613//cellular protein localization;GO:0009651//response to salt stress	GO:0005515//protein binding	GO:0005634//nucleus;GO:0005886//plasma membrane
CL1056.Contig2_All	2179	746	11.4368	335	4.8742	195	3.0643	gi|567200139|ref|XP_006407339.1|	1096.3	0	hypothetical protein EUTSA_v10020362mg [Eutrema salsugineum] >gi|557108485|gb|ESQ48792.1| hypothetical protein EUTSA_v10020362mg [Eutrema salsugineum]	gi|30682154|ref|NM_112071.2|	2226	0	Arabidopsis thaliana protein INCREASED TOLERANCE TO NACL mRNA, complete cds	sp|Q9C7A2|Y3236_ARATH	1082	0	Ankyrin repeat-containing protein At3g12360 OS=Arabidopsis thaliana GN=At3g12360 PE=2 SV=1	all2748	100	1e-21	COG0666	FOG: Ankyrin repeat	K06694	6e-16	79.3	pop:POPTR_659236	26S proteasome non-ATPase regulatory subunit 10	GO:0034613//cellular protein localization;GO:0009651//response to salt stress	GO:0005515//protein binding	GO:0005634//nucleus;GO:0005886//plasma membrane
CL1057.Contig1_All	2068	268	4.3292	536	8.2174	67	1.1094	gi|567213871|ref|XP_006410988.1|	1022.7	0	hypothetical protein EUTSA_v10016423mg [Eutrema salsugineum] >gi|557112157|gb|ESQ52441.1| hypothetical protein EUTSA_v10016423mg [Eutrema salsugineum]	gi|330250293|gb|CP002685.1|	783	0	Arabidopsis thaliana chromosome 2, complete sequence	sp|Q9M331|PTR45_ARATH	895	0	Probable peptide/nitrate transporter At3g53960 OS=Arabidopsis thaliana GN=At3g53960 PE=2 SV=2	ECU11g1050	121	2e-28	COG3104	Dipeptide/tripeptide permease	K14638	4e-143	431	pop:POPTR_752070	solute carrier family 15 (peptide/histidine transporter), member 3/4	GO:0006857//oligopeptide transport;GO:0009718//anthocyanin-containing compound biosynthetic process	GO:0005215//transporter activity	GO:0016021//integral to membrane;GO:0005886//plasma membrane
CL1057.Contig2_All	1420	3195	75.1635	52	1.161	1	0.0241	gi|567186832|ref|XP_006403634.1|	705.7	0	hypothetical protein EUTSA_v10010224mg [Eutrema salsugineum] >gi|557104753|gb|ESQ45087.1| hypothetical protein EUTSA_v10010224mg [Eutrema salsugineum]	gi|297820131|ref|XM_002877903.1|	856	0	Arabidopsis lyrata subsp. lyrata proton-dependent oligopeptide transport family protein, mRNA	sp|Q9M331|PTR45_ARATH	639	0	Probable peptide/nitrate transporter At3g53960 OS=Arabidopsis thaliana GN=At3g53960 PE=2 SV=2	ECU11g1050	61.6	2e-09	COG3104	Dipeptide/tripeptide permease	K14638	1e-85	275	mtr:MTR_4g015080	solute carrier family 15 (peptide/histidine transporter), member 3/4	GO:0006857//oligopeptide transport;GO:0009718//anthocyanin-containing compound biosynthetic process	GO:0005215//transporter activity	GO:0016021//integral to membrane;GO:0005886//plasma membrane
CL1057.Contig3_All	2104	5688	90.3106	776	11.6932	280	4.5569	gi|567186832|ref|XP_006403634.1|	1075.1	0	hypothetical protein EUTSA_v10010224mg [Eutrema salsugineum] >gi|557104753|gb|ESQ45087.1| hypothetical protein EUTSA_v10010224mg [Eutrema salsugineum]	gi|145339470|ref|NM_115256.3|	1612	0	Arabidopsis thaliana probable peptide/nitrate transporter mRNA, complete cds	sp|Q9M331|PTR45_ARATH	1002	0	Probable peptide/nitrate transporter At3g53960 OS=Arabidopsis thaliana GN=At3g53960 PE=2 SV=2	ECU11g1050	118	2e-27	COG3104	Dipeptide/tripeptide permease	K14638	2e-142	430	ppp:PHYPADRAFT_134814	solute carrier family 15 (peptide/histidine transporter), member 3/4	GO:0006857//oligopeptide transport;GO:0009718//anthocyanin-containing compound biosynthetic process	GO:0005215//transporter activity	GO:0016021//integral to membrane;GO:0005886//plasma membrane
CL1057.Contig4_All	1934	1733	29.9341	50	0.8197	466	8.2506	gi|567186832|ref|XP_006403634.1|	1058.5	0	hypothetical protein EUTSA_v10010224mg [Eutrema salsugineum] >gi|557104753|gb|ESQ45087.1| hypothetical protein EUTSA_v10010224mg [Eutrema salsugineum]	gi|297820131|ref|XM_002877903.1|	1552	0	Arabidopsis lyrata subsp. lyrata proton-dependent oligopeptide transport family protein, mRNA	sp|Q9M331|PTR45_ARATH	984	0	Probable peptide/nitrate transporter At3g53960 OS=Arabidopsis thaliana GN=At3g53960 PE=2 SV=2	ECU11g1050	115	8e-27	COG3104	Dipeptide/tripeptide permease	K14638	3e-139	419	pop:POPTR_752070	solute carrier family 15 (peptide/histidine transporter), member 3/4	GO:0006857//oligopeptide transport;GO:0009718//anthocyanin-containing compound biosynthetic process	GO:0005215//transporter activity	GO:0016021//integral to membrane;GO:0005886//plasma membrane
CL1058.Contig1_All	553	32	1.9331	40	2.2933	46	2.8483	gi|110739579|dbj|BAF01698.1|	224.6	1e-73	putative chloroplast inner envelope protein [Arabidopsis thaliana]	gi|145335202|ref|NM_100568.3|	385	1e-104	Arabidopsis thaliana protein TIC110 mRNA, complete cds	sp|Q8LPR9|TI110_ARATH	224	2e-68	Protein TIC110, chloroplastic OS=Arabidopsis thaliana GN=TIC110 PE=1 SV=1	--	--	--	--	--	--	--	--	--	--	GO:0009658//chloroplast organization;GO:0045037//protein import into chloroplast stroma	GO:0005515//protein binding	GO:0031897//Tic complex
CL1058.Contig2_All	3303	712	7.2011	928	8.9075	2404	24.9221	gi|567154734|ref|XP_006417864.1|	1762.7	0	hypothetical protein EUTSA_v10006671mg [Eutrema salsugineum] >gi|557095635|gb|ESQ36217.1| hypothetical protein EUTSA_v10006671mg [Eutrema salsugineum]	gi|297848975|ref|XM_002892323.1|	3703	0	Arabidopsis lyrata subsp. lyrata ATTIC110/TIC110, mRNA	sp|Q8LPR9|TI110_ARATH	1750	0	Protein TIC110, chloroplastic OS=Arabidopsis thaliana GN=TIC110 PE=1 SV=1	--	--	--	--	--	--	--	--	--	--	GO:0009658//chloroplast organization;GO:0045037//protein import into chloroplast stroma	GO:0005515//protein binding	GO:0031897//Tic complex
CL1058.Contig3_All	3322	1732	17.417	1537	14.6687	2441	25.1609	gi|567154734|ref|XP_006417864.1|	1802.7	0	hypothetical protein EUTSA_v10006671mg [Eutrema salsugineum] >gi|557095635|gb|ESQ36217.1| hypothetical protein EUTSA_v10006671mg [Eutrema salsugineum]	gi|145335202|ref|NM_100568.3|	3834	0	Arabidopsis thaliana protein TIC110 mRNA, complete cds	sp|Q8LPR9|TI110_ARATH	1785	0	Protein TIC110, chloroplastic OS=Arabidopsis thaliana GN=TIC110 PE=1 SV=1	--	--	--	--	--	--	--	--	--	--	GO:0009658//chloroplast organization;GO:0045037//protein import into chloroplast stroma	GO:0005515//protein binding	GO:0031897//Tic complex
CL1059.Contig10_All	2118	112	1.7665	54	0.8083	15	0.2425	gi|6644161|gb|AAF20931.1|AF206721_1	1022.3	0	ascorbate oxidase [Brassica juncea]	gi|6644160|gb|AF206721.1|AF206721	1526	0	Brassica juncea isolate BJAO1 ascorbate oxidase mRNA, partial cds	sp|Q40588|ASO_TOBAC	734	0	L-ascorbate oxidase OS=Nicotiana tabacum GN=AAO PE=2 SV=1	SPAC1F7.08	175	3e-46	COG2132	Putative multicopper oxidases	K00423	0	957	ath:AT5G21100	L-ascorbate oxidase [EC:1.10.3.3]	GO:0046520//sphingoid biosynthetic process;GO:0016126//sterol biosynthetic process;GO:0055114//oxidation-reduction process	GO:0005507//copper ion binding;GO:0008447//L-ascorbate oxidase activity	GO:0009505//plant-type cell wall;GO:0009506//plasmodesma;GO:0005576//extracellular region
CL1059.Contig11_All	2062	20	0.324	18	0.2768	14	0.2325	gi|567176270|ref|XP_006400680.1|	201.4	1e-54	hypothetical protein EUTSA_v10013093mg [Eutrema salsugineum] >gi|557101770|gb|ESQ42133.1| hypothetical protein EUTSA_v10013093mg [Eutrema salsugineum]	gi|6644160|gb|AF206721.1|AF206721	1009	0	Brassica juncea isolate BJAO1 ascorbate oxidase mRNA, partial cds	sp|Q40588|ASO_TOBAC	551	0	L-ascorbate oxidase OS=Nicotiana tabacum GN=AAO PE=2 SV=1	YMR058w	129	9e-31	COG2132	Putative multicopper oxidases	K00423	0	736	ath:AT5G21100	L-ascorbate oxidase [EC:1.10.3.3]	GO:0046520//sphingoid biosynthetic process;GO:0016126//sterol biosynthetic process;GO:0055114//oxidation-reduction process	GO:0005507//copper ion binding;GO:0008447//L-ascorbate oxidase activity	GO:0009505//plant-type cell wall;GO:0009506//plasmodesma;GO:0005576//extracellular region
CL1059.Contig12_All	1534	0	0	0	0	0	0	gi|193788025|dbj|BAG50513.1|	810.4	0	ascorbic acid oxidase [Brassica rapa subsp. chinensis]	gi|6644160|gb|AF206721.1|AF206721	882	0	Brassica juncea isolate BJAO1 ascorbate oxidase mRNA, partial cds	sp|P14133|ASO_CUCSA	642	0	L-ascorbate oxidase OS=Cucumis sativus PE=1 SV=1	YMR058w	134	7e-33	COG2132	Putative multicopper oxidases	K00423	0	779	ath:AT5G21100	L-ascorbate oxidase [EC:1.10.3.3]	GO:0046520//sphingoid biosynthetic process;GO:0016126//sterol biosynthetic process;GO:0055114//oxidation-reduction process	GO:0005507//copper ion binding;GO:0008447//L-ascorbate oxidase activity	GO:0009505//plant-type cell wall;GO:0009506//plasmodesma;GO:0005576//extracellular region
CL1059.Contig13_All	1853	610	10.9971	487	8.3324	229	4.2317	gi|193788025|dbj|BAG50513.1|	1141	0	ascorbic acid oxidase [Brassica rapa subsp. chinensis]	gi|193788024|dbj|AB369266.1|	2462	0	Brassica rapa subsp. chinensis BcAAO mRNA for ascorbic acid oxidase, complete cds	sp|P14133|ASO_CUCSA	800	0	L-ascorbate oxidase OS=Cucumis sativus PE=1 SV=1	SPAC1F7.08	177	2e-47	COG2132	Putative multicopper oxidases	K00423	0	1004	aly:ARALYDRAFT_489021	L-ascorbate oxidase [EC:1.10.3.3]	GO:0046520//sphingoid biosynthetic process;GO:0016126//sterol biosynthetic process;GO:0055114//oxidation-reduction process	GO:0005507//copper ion binding;GO:0008447//L-ascorbate oxidase activity	GO:0009505//plant-type cell wall;GO:0009506//plasmodesma;GO:0005576//extracellular region
CL1059.Contig14_All	1943	0	0	0	0	0	0	gi|567176270|ref|XP_006400680.1|	1028.1	0	hypothetical protein EUTSA_v10013093mg [Eutrema salsugineum] >gi|557101770|gb|ESQ42133.1| hypothetical protein EUTSA_v10013093mg [Eutrema salsugineum]	gi|6644160|gb|AF206721.1|AF206721	1269	0	Brassica juncea isolate BJAO1 ascorbate oxidase mRNA, partial cds	sp|Q40588|ASO_TOBAC	744	0	L-ascorbate oxidase OS=Nicotiana tabacum GN=AAO PE=2 SV=1	SPAC1F7.08	185	5e-50	COG2132	Putative multicopper oxidases	K00423	0	980	ath:AT5G21100	L-ascorbate oxidase [EC:1.10.3.3]	GO:0046520//sphingoid biosynthetic process;GO:0016126//sterol biosynthetic process;GO:0055114//oxidation-reduction process	GO:0005507//copper ion binding;GO:0008447//L-ascorbate oxidase activity	GO:0009505//plant-type cell wall;GO:0009506//plasmodesma;GO:0005576//extracellular region
CL1059.Contig15_All	1600	17	0.3549	13	0.2576	10	0.214	gi|240256322|ref|NP_680176.5|	207.2	0	L-ascorbate oxidase [Arabidopsis thaliana] >gi|332005549|gb|AED92932.1| L-ascorbate oxidase [Arabidopsis thaliana]	gi|334187808|ref|NM_001203424.1|	676	0	Arabidopsis thaliana L-ascorbate oxidase mRNA, complete cds	sp|Q40588|ASO_TOBAC	439	1e-169	L-ascorbate oxidase OS=Nicotiana tabacum GN=AAO PE=2 SV=1	SPAC1F7.08	92	5e-19	COG2132	Putative multicopper oxidases	K00423	0	557	aly:ARALYDRAFT_489021	L-ascorbate oxidase [EC:1.10.3.3]	GO:0046520//sphingoid biosynthetic process;GO:0016126//sterol biosynthetic process;GO:0055114//oxidation-reduction process	GO:0005507//copper ion binding;GO:0008447//L-ascorbate oxidase activity	GO:0009505//plant-type cell wall;GO:0009506//plasmodesma;GO:0005576//extracellular region
CL1059.Contig16_All	887	107	4.0298	38	1.3582	2	0.0772	gi|6644161|gb|AAF20931.1|AF206721_1	397.9	1e-134	ascorbate oxidase [Brassica juncea]	gi|199580278|gb|AC189583.2|	747	0	Brassica rapa subsp. pekinensis clone KBrH012D09, complete sequence	sp|P37064|ASO_CUCPM	281	2e-91	L-ascorbate oxidase OS=Cucurbita pepo var. melopepo PE=1 SV=1	SPAC1F7.08	85.9	4e-18	COG2132	Putative multicopper oxidases	K00423	3e-127	375	ath:AT5G21100	L-ascorbate oxidase [EC:1.10.3.3]	GO:0046520//sphingoid biosynthetic process;GO:0016126//sterol biosynthetic process;GO:0055114//oxidation-reduction process	GO:0005507//copper ion binding;GO:0008447//L-ascorbate oxidase activity	GO:0009505//plant-type cell wall;GO:0009506//plasmodesma;GO:0005576//extracellular region
CL1059.Contig17_All	1953	95	1.625	84	1.3636	46	0.8065	gi|567176274|ref|XP_006400681.1|	960.3	0	hypothetical protein EUTSA_v10013113mg [Eutrema salsugineum] >gi|557101771|gb|ESQ42134.1| hypothetical protein EUTSA_v10013113mg [Eutrema salsugineum]	gi|193788024|dbj|AB369266.1|	1053	0	Brassica rapa subsp. chinensis BcAAO mRNA for ascorbic acid oxidase, complete cds	sp|P24792|ASO_CUCMA	748	0	L-ascorbate oxidase OS=Cucurbita maxima GN=AAO PE=1 SV=2	SPAC1F7.08	180	3e-48	COG2132	Putative multicopper oxidases	K00423	0	954	aly:ARALYDRAFT_489021	L-ascorbate oxidase [EC:1.10.3.3]	GO:0046520//sphingoid biosynthetic process;GO:0016126//sterol biosynthetic process;GO:0055114//oxidation-reduction process	GO:0005507//copper ion binding;GO:0008447//L-ascorbate oxidase activity	GO:0009505//plant-type cell wall;GO:0009506//plasmodesma;GO:0005576//extracellular region
CL1059.Contig18_All	1960	100	1.7044	826	13.3611	3790	66.2127	gi|6644161|gb|AAF20931.1|AF206721_1	1146.7	0	ascorbate oxidase [Brassica juncea]	gi|6644160|gb|AF206721.1|AF206721	2516	0	Brassica juncea isolate BJAO1 ascorbate oxidase mRNA, partial cds	sp|P14133|ASO_CUCSA	727	0	L-ascorbate oxidase OS=Cucumis sativus PE=1 SV=1	SPAC1F7.08	181	2e-48	COG2132	Putative multicopper oxidases	K00423	0	975	ath:AT5G21100	L-ascorbate oxidase [EC:1.10.3.3]	GO:0046520//sphingoid biosynthetic process;GO:0016126//sterol biosynthetic process;GO:0055114//oxidation-reduction process	GO:0005507//copper ion binding;GO:0008447//L-ascorbate oxidase activity	GO:0009505//plant-type cell wall;GO:0009506//plasmodesma;GO:0005576//extracellular region
CL1059.Contig19_All	1634	0	0	0	0	0	0	gi|6644161|gb|AAF20931.1|AF206721_1	204.5	0	ascorbate oxidase [Brassica juncea]	gi|6644160|gb|AF206721.1|AF206721	936	0	Brassica juncea isolate BJAO1 ascorbate oxidase mRNA, partial cds	sp|Q40588|ASO_TOBAC	401	1e-158	L-ascorbate oxidase OS=Nicotiana tabacum GN=AAO PE=2 SV=1	YFL041w	78.2	1e-14	COG2132	Putative multicopper oxidases	K00423	0	522	ath:AT5G21100	L-ascorbate oxidase [EC:1.10.3.3]	GO:0046520//sphingoid biosynthetic process;GO:0016126//sterol biosynthetic process;GO:0055114//oxidation-reduction process	GO:0005507//copper ion binding;GO:0008447//L-ascorbate oxidase activity	GO:0009505//plant-type cell wall;GO:0009506//plasmodesma;GO:0005576//extracellular region
CL1059.Contig1_All	1991	0	0	0	0	0	0	gi|567176270|ref|XP_006400680.1|	996.9	0	hypothetical protein EUTSA_v10013093mg [Eutrema salsugineum] >gi|557101770|gb|ESQ42133.1| hypothetical protein EUTSA_v10013093mg [Eutrema salsugineum]	gi|6644160|gb|AF206721.1|AF206721	989	0	Brassica juncea isolate BJAO1 ascorbate oxidase mRNA, partial cds	sp|Q40588|ASO_TOBAC	741	0	L-ascorbate oxidase OS=Nicotiana tabacum GN=AAO PE=2 SV=1	SPAC1F7.08	184	2e-49	COG2132	Putative multicopper oxidases	K00423	0	949	ath:AT5G21100	L-ascorbate oxidase [EC:1.10.3.3]	GO:0046520//sphingoid biosynthetic process;GO:0016126//sterol biosynthetic process;GO:0055114//oxidation-reduction process	GO:0005507//copper ion binding;GO:0008447//L-ascorbate oxidase activity	GO:0009505//plant-type cell wall;GO:0009506//plasmodesma;GO:0005576//extracellular region
CL1059.Contig20_All	2018	0	0	0	0	0	0	gi|567176270|ref|XP_006400680.1|	201.4	0	hypothetical protein EUTSA_v10013093mg [Eutrema salsugineum] >gi|557101770|gb|ESQ42133.1| hypothetical protein EUTSA_v10013093mg [Eutrema salsugineum]	gi|6644160|gb|AF206721.1|AF206721	737	0	Brassica juncea isolate BJAO1 ascorbate oxidase mRNA, partial cds	sp|Q40588|ASO_TOBAC	548	0	L-ascorbate oxidase OS=Nicotiana tabacum GN=AAO PE=2 SV=1	YFL041w	129	8e-31	COG2132	Putative multicopper oxidases	K00423	0	704	ath:AT5G21100	L-ascorbate oxidase [EC:1.10.3.3]	GO:0046520//sphingoid biosynthetic process;GO:0016126//sterol biosynthetic process;GO:0055114//oxidation-reduction process	GO:0005507//copper ion binding;GO:0008447//L-ascorbate oxidase activity	GO:0009505//plant-type cell wall;GO:0009506//plasmodesma;GO:0005576//extracellular region
CL1059.Contig21_All	2032	0	0	0	0	0	0	gi|6644161|gb|AAF20931.1|AF206721_1	1024.6	0	ascorbate oxidase [Brassica juncea]	gi|6644160|gb|AF206721.1|AF206721	1518	0	Brassica juncea isolate BJAO1 ascorbate oxidase mRNA, partial cds	sp|Q40588|ASO_TOBAC	741	0	L-ascorbate oxidase OS=Nicotiana tabacum GN=AAO PE=2 SV=1	SPAC1F7.08	186	3e-50	COG2132	Putative multicopper oxidases	K00423	0	981	ath:AT5G21100	L-ascorbate oxidase [EC:1.10.3.3]	GO:0046520//sphingoid biosynthetic process;GO:0016126//sterol biosynthetic process;GO:0055114//oxidation-reduction process	GO:0005507//copper ion binding;GO:0008447//L-ascorbate oxidase activity	GO:0009505//plant-type cell wall;GO:0009506//plasmodesma;GO:0005576//extracellular region
CL1059.Contig22_All	1890	0	0	0	0	0	0	gi|567176270|ref|XP_006400680.1|	220.3	0	hypothetical protein EUTSA_v10013093mg [Eutrema salsugineum] >gi|557101770|gb|ESQ42133.1| hypothetical protein EUTSA_v10013093mg [Eutrema salsugineum]	gi|6644160|gb|AF206721.1|AF206721	1009	0	Brassica juncea isolate BJAO1 ascorbate oxidase mRNA, partial cds	sp|Q40588|ASO_TOBAC	551	0	L-ascorbate oxidase OS=Nicotiana tabacum GN=AAO PE=2 SV=1	YMR058w	129	6e-31	COG2132	Putative multicopper oxidases	K00423	0	736	ath:AT5G21100	L-ascorbate oxidase [EC:1.10.3.3]	GO:0046520//sphingoid biosynthetic process;GO:0016126//sterol biosynthetic process;GO:0055114//oxidation-reduction process	GO:0005507//copper ion binding;GO:0008447//L-ascorbate oxidase activity	GO:0009505//plant-type cell wall;GO:0009506//plasmodesma;GO:0005576//extracellular region
CL1059.Contig23_All	1733	0	0	0	0	0	0	gi|297808167|ref|XP_002871967.1|	803.1	0	ascorbate oxidase [Arabidopsis lyrata subsp. lyrata] >gi|297317804|gb|EFH48226.1| ascorbate oxidase [Arabidopsis lyrata subsp. lyrata]	gi|334187808|ref|NM_001203424.1|	676	0	Arabidopsis thaliana L-ascorbate oxidase mRNA, complete cds	sp|P24792|ASO_CUCMA	639	0	L-ascorbate oxidase OS=Cucurbita maxima GN=AAO PE=1 SV=2	SPAC1F7.08	149	1e-37	COG2132	Putative multicopper oxidases	K00423	0	803	aly:ARALYDRAFT_489021	L-ascorbate oxidase [EC:1.10.3.3]	GO:0046520//sphingoid biosynthetic process;GO:0016126//sterol biosynthetic process;GO:0055114//oxidation-reduction process	GO:0005507//copper ion binding;GO:0008447//L-ascorbate oxidase activity	GO:0009505//plant-type cell wall;GO:0009506//plasmodesma;GO:0005576//extracellular region
CL1059.Contig24_All	2048	0	0	0	0	0	0	gi|193788025|dbj|BAG50513.1|	227.6	0	ascorbic acid oxidase [Brassica rapa subsp. chinensis]	gi|193788024|dbj|AB369266.1|	1370	0	Brassica rapa subsp. chinensis BcAAO mRNA for ascorbic acid oxidase, complete cds	sp|P24792|ASO_CUCMA	564	0	L-ascorbate oxidase OS=Cucurbita maxima GN=AAO PE=1 SV=2	YMR058w	127	5e-30	COG2132	Putative multicopper oxidases	K00423	0	724	aly:ARALYDRAFT_489021	L-ascorbate oxidase [EC:1.10.3.3]	GO:0046520//sphingoid biosynthetic process;GO:0016126//sterol biosynthetic process;GO:0055114//oxidation-reduction process	GO:0005507//copper ion binding;GO:0008447//L-ascorbate oxidase activity	GO:0009505//plant-type cell wall;GO:0009506//plasmodesma;GO:0005576//extracellular region
CL1059.Contig25_All	1851	0	0	0	0	0	0	gi|567176270|ref|XP_006400680.1|	986.5	0	hypothetical protein EUTSA_v10013093mg [Eutrema salsugineum] >gi|557101770|gb|ESQ42133.1| hypothetical protein EUTSA_v10013093mg [Eutrema salsugineum]	gi|6644160|gb|AF206721.1|AF206721	1027	0	Brassica juncea isolate BJAO1 ascorbate oxidase mRNA, partial cds	sp|Q40588|ASO_TOBAC	737	0	L-ascorbate oxidase OS=Nicotiana tabacum GN=AAO PE=2 SV=1	SPAC1F7.08	181	1e-48	COG2132	Putative multicopper oxidases	K00423	0	939	ath:AT5G21100	L-ascorbate oxidase [EC:1.10.3.3]	GO:0046520//sphingoid biosynthetic process;GO:0016126//sterol biosynthetic process;GO:0055114//oxidation-reduction process	GO:0005507//copper ion binding;GO:0008447//L-ascorbate oxidase activity	GO:0009505//plant-type cell wall;GO:0009506//plasmodesma;GO:0005576//extracellular region
CL1059.Contig26_All	1496	0	0	0	0	0	0	gi|193788025|dbj|BAG50513.1|	849.7	0	ascorbic acid oxidase [Brassica rapa subsp. chinensis]	gi|199580278|gb|AC189583.2|	775	0	Brassica rapa subsp. pekinensis clone KBrH012D09, complete sequence	sp|Q40588|ASO_TOBAC	632	0	L-ascorbate oxidase OS=Nicotiana tabacum GN=AAO PE=2 SV=1	YFL041w	141	2e-35	COG2132	Putative multicopper oxidases	K00423	0	775	aly:ARALYDRAFT_489021	L-ascorbate oxidase [EC:1.10.3.3]	GO:0046520//sphingoid biosynthetic process;GO:0016126//sterol biosynthetic process;GO:0055114//oxidation-reduction process	GO:0005507//copper ion binding;GO:0008447//L-ascorbate oxidase activity	GO:0009505//plant-type cell wall;GO:0009506//plasmodesma;GO:0005576//extracellular region
CL1059.Contig27_All	1798	0	0	0	0	0	0	gi|567176270|ref|XP_006400680.1|	209.9	0	hypothetical protein EUTSA_v10013093mg [Eutrema salsugineum] >gi|557101770|gb|ESQ42133.1| hypothetical protein EUTSA_v10013093mg [Eutrema salsugineum]	gi|6644160|gb|AF206721.1|AF206721	737	0	Brassica juncea isolate BJAO1 ascorbate oxidase mRNA, partial cds	sp|Q40588|ASO_TOBAC	548	0	L-ascorbate oxidase OS=Nicotiana tabacum GN=AAO PE=2 SV=1	YFL041w	129	5e-31	COG2132	Putative multicopper oxidases	K00423	0	704	ath:AT5G21100	L-ascorbate oxidase [EC:1.10.3.3]	GO:0046520//sphingoid biosynthetic process;GO:0016126//sterol biosynthetic process;GO:0055114//oxidation-reduction process	GO:0005507//copper ion binding;GO:0008447//L-ascorbate oxidase activity	GO:0009505//plant-type cell wall;GO:0009506//plasmodesma;GO:0005576//extracellular region
CL1059.Contig2_All	2101	0	0	0	0	0	0	gi|193788025|dbj|BAG50513.1|	1022.3	0	ascorbic acid oxidase [Brassica rapa subsp. chinensis]	gi|193788024|dbj|AB369266.1|	1370	0	Brassica rapa subsp. chinensis BcAAO mRNA for ascorbic acid oxidase, complete cds	sp|P24792|ASO_CUCMA	758	0	L-ascorbate oxidase OS=Cucurbita maxima GN=AAO PE=1 SV=2	SPAC1F7.08	172	5e-45	COG2132	Putative multicopper oxidases	K00423	0	969	aly:ARALYDRAFT_489021	L-ascorbate oxidase [EC:1.10.3.3]	GO:0046520//sphingoid biosynthetic process;GO:0016126//sterol biosynthetic process;GO:0055114//oxidation-reduction process	GO:0005507//copper ion binding;GO:0008447//L-ascorbate oxidase activity	GO:0009505//plant-type cell wall;GO:0009506//plasmodesma;GO:0005576//extracellular region
CL1059.Contig3_All	1680	0	0	0	0	0	0	gi|297808167|ref|XP_002871967.1|	223.4	0	ascorbate oxidase [Arabidopsis lyrata subsp. lyrata] >gi|297317804|gb|EFH48226.1| ascorbate oxidase [Arabidopsis lyrata subsp. lyrata]	gi|334187808|ref|NM_001203424.1|	676	0	Arabidopsis thaliana L-ascorbate oxidase mRNA, complete cds	sp|P24792|ASO_CUCMA	446	2e-170	L-ascorbate oxidase OS=Cucurbita maxima GN=AAO PE=1 SV=2	SPAC1F7.08	90.9	1e-18	COG2132	Putative multicopper oxidases	K00423	0	557	aly:ARALYDRAFT_489021	L-ascorbate oxidase [EC:1.10.3.3]	GO:0046520//sphingoid biosynthetic process;GO:0016126//sterol biosynthetic process;GO:0055114//oxidation-reduction process	GO:0005507//copper ion binding;GO:0008447//L-ascorbate oxidase activity	GO:0009505//plant-type cell wall;GO:0009506//plasmodesma;GO:0005576//extracellular region
CL1059.Contig4_All	1541	255	5.5279	347	7.1391	92	2.0443	gi|193788025|dbj|BAG50513.1|	966.1	0	ascorbic acid oxidase [Brassica rapa subsp. chinensis]	gi|193788024|dbj|AB369266.1|	2117	0	Brassica rapa subsp. chinensis BcAAO mRNA for ascorbic acid oxidase, complete cds	sp|P14133|ASO_CUCSA	664	0	L-ascorbate oxidase OS=Cucumis sativus PE=1 SV=1	YMR058w	134	4e-33	COG2132	Putative multicopper oxidases	K00423	0	848	aly:ARALYDRAFT_489021	L-ascorbate oxidase [EC:1.10.3.3]	GO:0046520//sphingoid biosynthetic process;GO:0016126//sterol biosynthetic process;GO:0055114//oxidation-reduction process	GO:0005507//copper ion binding;GO:0008447//L-ascorbate oxidase activity	GO:0009505//plant-type cell wall;GO:0009506//plasmodesma;GO:0005576//extracellular region
CL1059.Contig5_All	2071	0	0	0	0	0	0	gi|567176270|ref|XP_006400680.1|	978	0	hypothetical protein EUTSA_v10013093mg [Eutrema salsugineum] >gi|557101770|gb|ESQ42133.1| hypothetical protein EUTSA_v10013093mg [Eutrema salsugineum]	gi|6644160|gb|AF206721.1|AF206721	948	0	Brassica juncea isolate BJAO1 ascorbate oxidase mRNA, partial cds	sp|Q40588|ASO_TOBAC	743	0	L-ascorbate oxidase OS=Nicotiana tabacum GN=AAO PE=2 SV=1	SPAC1F7.08	177	5e-47	COG2132	Putative multicopper oxidases	K00423	0	936	ath:AT5G21100	L-ascorbate oxidase [EC:1.10.3.3]	GO:0046520//sphingoid biosynthetic process;GO:0016126//sterol biosynthetic process;GO:0055114//oxidation-reduction process	GO:0005507//copper ion binding;GO:0008447//L-ascorbate oxidase activity	GO:0009505//plant-type cell wall;GO:0009506//plasmodesma;GO:0005576//extracellular region
CL1059.Contig6_All	1979	0	0	0	0	0	0	gi|6644161|gb|AAF20931.1|AF206721_1	217.6	0	ascorbate oxidase [Brassica juncea]	gi|6644160|gb|AF206721.1|AF206721	1267	0	Brassica juncea isolate BJAO1 ascorbate oxidase mRNA, partial cds	sp|Q40588|ASO_TOBAC	548	0	L-ascorbate oxidase OS=Nicotiana tabacum GN=AAO PE=2 SV=1	YMR058w	130	3e-31	COG2132	Putative multicopper oxidases	K00423	0	737	ath:AT5G21100	L-ascorbate oxidase [EC:1.10.3.3]	GO:0046520//sphingoid biosynthetic process;GO:0016126//sterol biosynthetic process;GO:0055114//oxidation-reduction process	GO:0005507//copper ion binding;GO:0008447//L-ascorbate oxidase activity	GO:0009505//plant-type cell wall;GO:0009506//plasmodesma;GO:0005576//extracellular region
CL1059.Contig7_All	1938	0	0	0	0	0	0	gi|567176270|ref|XP_006400680.1|	220.3	0	hypothetical protein EUTSA_v10013093mg [Eutrema salsugineum] >gi|557101770|gb|ESQ42133.1| hypothetical protein EUTSA_v10013093mg [Eutrema salsugineum]	gi|6644160|gb|AF206721.1|AF206721	737	0	Brassica juncea isolate BJAO1 ascorbate oxidase mRNA, partial cds	sp|Q40588|ASO_TOBAC	548	0	L-ascorbate oxidase OS=Nicotiana tabacum GN=AAO PE=2 SV=1	YFL041w	129	7e-31	COG2132	Putative multicopper oxidases	K00423	0	704	ath:AT5G21100	L-ascorbate oxidase [EC:1.10.3.3]	GO:0046520//sphingoid biosynthetic process;GO:0016126//sterol biosynthetic process;GO:0055114//oxidation-reduction process	GO:0005507//copper ion binding;GO:0008447//L-ascorbate oxidase activity	GO:0009505//plant-type cell wall;GO:0009506//plasmodesma;GO:0005576//extracellular region
CL1059.Contig8_All	2021	0	0	0	0	0	0	gi|193788025|dbj|BAG50513.1|	998.4	0	ascorbic acid oxidase [Brassica rapa subsp. chinensis]	gi|193788024|dbj|AB369266.1|	1370	0	Brassica rapa subsp. chinensis BcAAO mRNA for ascorbic acid oxidase, complete cds	sp|P24792|ASO_CUCMA	754	0	L-ascorbate oxidase OS=Cucurbita maxima GN=AAO PE=1 SV=2	SPAC1F7.08	178	3e-47	COG2132	Putative multicopper oxidases	K00423	0	952	aly:ARALYDRAFT_489021	L-ascorbate oxidase [EC:1.10.3.3]	GO:0046520//sphingoid biosynthetic process;GO:0016126//sterol biosynthetic process;GO:0055114//oxidation-reduction process	GO:0005507//copper ion binding;GO:0008447//L-ascorbate oxidase activity	GO:0009505//plant-type cell wall;GO:0009506//plasmodesma;GO:0005576//extracellular region
CL1059.Contig9_All	1968	0	0	0	0	0	0	gi|193788025|dbj|BAG50513.1|	203.8	1e-55	ascorbic acid oxidase [Brassica rapa subsp. chinensis]	gi|193788024|dbj|AB369266.1|	1370	0	Brassica rapa subsp. chinensis BcAAO mRNA for ascorbic acid oxidase, complete cds	sp|P37064|ASO_CUCPM	562	0	L-ascorbate oxidase OS=Cucurbita pepo var. melopepo PE=1 SV=1	YMR058w	127	4e-30	COG2132	Putative multicopper oxidases	K00423	0	724	aly:ARALYDRAFT_489021	L-ascorbate oxidase [EC:1.10.3.3]	GO:0046520//sphingoid biosynthetic process;GO:0016126//sterol biosynthetic process;GO:0055114//oxidation-reduction process	GO:0005507//copper ion binding;GO:0008447//L-ascorbate oxidase activity	GO:0009505//plant-type cell wall;GO:0009506//plasmodesma;GO:0005576//extracellular region
CL106.Contig1_All	1551	692	14.9046	568	11.6106	564	12.4516	gi|430218445|gb|AGA37226.1|	707.6	0	mitogen-activated protein kinase kinase kinase Raf34.1 [Brassica napus]	gi|430218444|gb|KC190107.1|	1905	0	Brassica napus mitogen-activated protein kinase kinase kinase Raf34.1 (Raf34.1) mRNA, complete cds	sp|Q2MHE4|HT1_ARATH	225	1e-68	Serine/threonine-protein kinase HT1 OS=Arabidopsis thaliana GN=HT1 PE=1 SV=1	L138452_1	105	7e-24	COG0515	Serine/threonine protein kinase	K04424	9e-38	149	ath:AT5G11850	sterile alpha motif and leucine zipper containing kinase AZK [EC:2.7.11.25]	GO:0000186//activation of MAPKK activity;GO:0007020//microtubule nucleation;GO:0010053//root epidermal cell differentiation	GO:0004712//protein serine/threonine/tyrosine kinase activity;GO:0004709//MAP kinase kinase kinase activity;GO:0005524//ATP binding	GO:0005739//mitochondrion
CL106.Contig2_All	277	27	3.2562	3	0.3434	2	0.2472	gi|593797452|ref|XP_007161764.1|	184.5	1e-58	hypothetical protein PHAVU_001G096600g [Phaseolus vulgaris] >gi|561035228|gb|ESW33758.1| hypothetical protein PHAVU_001G096600g [Phaseolus vulgaris]	gi|186527983|ref|NM_123418.4|	375	1e-101	Arabidopsis thaliana protein kinase family protein mRNA, complete cds	sp|Q2MHE4|HT1_ARATH	84.7	7e-21	Serine/threonine-protein kinase HT1 OS=Arabidopsis thaliana GN=HT1 PE=1 SV=1	MG109	65.9	1e-13	COG0515	Serine/threonine protein kinase	K06228	8e-14	65.5	cre:CHLREDRAFT_104702	fused [EC:2.7.11.1]	GO:0010053//root epidermal cell differentiation;GO:0000186//activation of MAPKK activity	GO:0004712//protein serine/threonine/tyrosine kinase activity;GO:0004713//protein tyrosine kinase activity;GO:0005524//ATP binding;GO:0004709//MAP kinase kinase kinase activity	GO:0005739//mitochondrion;GO:0005634//nucleus
CL106.Contig3_All	1636	537	10.9652	271	5.2518	128	2.6791	gi|594097051|gb|AHL77719.1|	706.1	0	mitogen activated kinase kinase kinase Raf41 [Brassica napus]	gi|594097050|gb|KF129402.1|	1713	0	Brassica napus cultivar DH12075 mitogen activated kinase kinase kinase Raf41 (Raf41) mRNA, complete cds	sp|Q2MHE4|HT1_ARATH	223	1e-67	Serine/threonine-protein kinase HT1 OS=Arabidopsis thaliana GN=HT1 PE=1 SV=1	L138452_1	107	2e-24	COG0515	Serine/threonine protein kinase	K14510	8e-39	152	ppp:PHYPADRAFT_30352	serine/threonine-protein kinase CTR1 [EC:2.7.11.1]	GO:0010053//root epidermal cell differentiation;GO:0000186//activation of MAPKK activity	GO:0004712//protein serine/threonine/tyrosine kinase activity;GO:0004713//protein tyrosine kinase activity;GO:0005524//ATP binding;GO:0004709//MAP kinase kinase kinase activity	GO:0005739//mitochondrion;GO:0005634//nucleus
CL1060.Contig1_All	1207	28	0.775	36	0.9456	2	0.0567	gi|567150667|ref|XP_006416709.1|	114.8	2e-27	hypothetical protein EUTSA_v10008415mg [Eutrema salsugineum] >gi|557094480|gb|ESQ35062.1| hypothetical protein EUTSA_v10008415mg [Eutrema salsugineum]	gi|202070636|gb|AC172887.2|	327	2e-86	Brassica rapa subsp. pekinensis clone KBrS004B22, complete sequence	sp|Q9LDU5|TI11A_ARATH	254	9e-83	Protein TIFY 11A OS=Arabidopsis thaliana GN=TIFY11A PE=1 SV=1	--	--	--	--	--	K13464	1e-83	258	aly:ARALYDRAFT_312706	jasmonate ZIM domain-containing protein	GO:0009611//response to wounding;GO:0009620//response to fungus;GO:0009867//jasmonic acid mediated signaling pathway;GO:0009414//response to water deprivation;GO:0007275//multicellular organismal development;GO:0009693//ethylene biosynthetic process;GO:0010200//response to chitin;GO:0009733//response to auxin stimulus;GO:0042538//hyperosmotic salinity response;GO:0048856//anatomical structure dev…	GO:0005515//protein binding	GO:0005634//nucleus
CL1060.Contig2_All	1161	619	17.8108	407	11.1143	237	6.99	gi|567150667|ref|XP_006416709.1|	439.9	6e-154	hypothetical protein EUTSA_v10008415mg [Eutrema salsugineum] >gi|557094480|gb|ESQ35062.1| hypothetical protein EUTSA_v10008415mg [Eutrema salsugineum]	gi|21406391|gb|AY087653.1|	285	6e-74	Arabidopsis thaliana clone 37370 mRNA, complete sequence	sp|Q9LDU5|TI11A_ARATH	370	2e-128	Protein TIFY 11A OS=Arabidopsis thaliana GN=TIFY11A PE=1 SV=1	--	--	--	--	--	K13464	6e-128	370	ath:AT1G17380	jasmonate ZIM domain-containing protein	GO:0009611//response to wounding;GO:0009620//response to fungus;GO:0009867//jasmonic acid mediated signaling pathway;GO:0009414//response to water deprivation;GO:0009693//ethylene biosynthetic process;GO:0010200//response to chitin;GO:0009733//response to auxin stimulus;GO:0042538//hyperosmotic salinity response;GO:0009695//jasmonic acid biosynthetic process;GO:0009738//abscisic acid mediated sig…	GO:0005515//protein binding	GO:0005634//nucleus
CL1060.Contig3_All	1095	0	0	0	0	0	0	gi|567150667|ref|XP_006416709.1|	416.8	3e-145	hypothetical protein EUTSA_v10008415mg [Eutrema salsugineum] >gi|557094480|gb|ESQ35062.1| hypothetical protein EUTSA_v10008415mg [Eutrema salsugineum]	gi|202070636|gb|AC172887.2|	262	8e-67	Brassica rapa subsp. pekinensis clone KBrS004B22, complete sequence	sp|Q9LDU5|TI11A_ARATH	356	3e-123	Protein TIFY 11A OS=Arabidopsis thaliana GN=TIFY11A PE=1 SV=1	--	--	--	--	--	K13464	3e-126	365	aly:ARALYDRAFT_312706	jasmonate ZIM domain-containing protein	GO:0009611//response to wounding;GO:0009620//response to fungus;GO:0009867//jasmonic acid mediated signaling pathway;GO:0009414//response to water deprivation;GO:0009693//ethylene biosynthetic process;GO:0010200//response to chitin;GO:0009733//response to auxin stimulus;GO:0042538//hyperosmotic salinity response;GO:0009695//jasmonic acid biosynthetic process;GO:0009738//abscisic acid mediated sig…	GO:0005515//protein binding	GO:0005634//nucleus
CL1060.Contig4_All	1083	15	0.4627	18	0.5269	8	0.2529	gi|567150667|ref|XP_006416709.1|	394	2e-136	hypothetical protein EUTSA_v10008415mg [Eutrema salsugineum] >gi|557094480|gb|ESQ35062.1| hypothetical protein EUTSA_v10008415mg [Eutrema salsugineum]	gi|202070636|gb|AC172887.2|	311	1e-81	Brassica rapa subsp. pekinensis clone KBrS004B22, complete sequence	sp|Q9LDU5|TI11A_ARATH	362	1e-125	Protein TIFY 11A OS=Arabidopsis thaliana GN=TIFY11A PE=1 SV=1	--	--	--	--	--	K13464	2e-125	362	aly:ARALYDRAFT_312706	jasmonate ZIM domain-containing protein	GO:0009733//response to auxin stimulus;GO:0009693//ethylene biosynthetic process;GO:0009620//response to fungus;GO:0009414//response to water deprivation;GO:0009867//jasmonic acid mediated signaling pathway;GO:0009723//response to ethylene stimulus;GO:0009611//response to wounding;GO:0009695//jasmonic acid biosynthetic process;GO:0042538//hyperosmotic salinity response;GO:0009738//abscisic acid m…	GO:0005515//protein binding	GO:0005634//nucleus
CL1060.Contig5_All	1259	0	0	0	0	0	0	gi|567150667|ref|XP_006416709.1|	114.8	3e-27	hypothetical protein EUTSA_v10008415mg [Eutrema salsugineum] >gi|557094480|gb|ESQ35062.1| hypothetical protein EUTSA_v10008415mg [Eutrema salsugineum]	gi|202070636|gb|AC172887.2|	262	9e-67	Brassica rapa subsp. pekinensis clone KBrS004B22, complete sequence	sp|Q9LDU5|TI11A_ARATH	262	1e-85	Protein TIFY 11A OS=Arabidopsis thaliana GN=TIFY11A PE=1 SV=1	--	--	--	--	--	K13464	2e-85	263	aly:ARALYDRAFT_312706	jasmonate ZIM domain-containing protein	GO:0009611//response to wounding;GO:0009620//response to fungus;GO:0009867//jasmonic acid mediated signaling pathway;GO:0009414//response to water deprivation;GO:0009693//ethylene biosynthetic process;GO:0010200//response to chitin;GO:0009733//response to auxin stimulus;GO:0042538//hyperosmotic salinity response;GO:0009695//jasmonic acid biosynthetic process;GO:0009738//abscisic acid mediated sig…	GO:0005515//protein binding	GO:0005634//nucleus
CL1060.Contig6_All	1102	253	7.6694	223	6.4157	159	4.9405	gi|567150667|ref|XP_006416709.1|	131.3	8e-34	hypothetical protein EUTSA_v10008415mg [Eutrema salsugineum] >gi|557094480|gb|ESQ35062.1| hypothetical protein EUTSA_v10008415mg [Eutrema salsugineum]	gi|202070636|gb|AC172887.2|	216	4e-53	Brassica rapa subsp. pekinensis clone KBrS004B22, complete sequence	sp|Q9LDU5|TI11A_ARATH	224	1e-71	Protein TIFY 11A OS=Arabidopsis thaliana GN=TIFY11A PE=1 SV=1	--	--	--	--	--	K13464	3e-71	224	ath:AT1G17380	jasmonate ZIM domain-containing protein	GO:0009611//response to wounding;GO:0009620//response to fungus;GO:0009867//jasmonic acid mediated signaling pathway;GO:0009414//response to water deprivation;GO:0009693//ethylene biosynthetic process;GO:0010200//response to chitin;GO:0009733//response to auxin stimulus;GO:0042538//hyperosmotic salinity response;GO:0009695//jasmonic acid biosynthetic process;GO:0009738//abscisic acid mediated sig…	GO:0005515//protein binding	GO:0005634//nucleus
CL1060.Contig7_All	965	0	0	0	0	0	0	gi|567150667|ref|XP_006416709.1|	370.9	8e-128	hypothetical protein EUTSA_v10008415mg [Eutrema salsugineum] >gi|557094480|gb|ESQ35062.1| hypothetical protein EUTSA_v10008415mg [Eutrema salsugineum]	gi|202070636|gb|AC172887.2|	319	4e-84	Brassica rapa subsp. pekinensis clone KBrS004B22, complete sequence	sp|Q9LDU5|TI11A_ARATH	350	1e-121	Protein TIFY 11A OS=Arabidopsis thaliana GN=TIFY11A PE=1 SV=1	--	--	--	--	--	K13464	6e-126	362	aly:ARALYDRAFT_312706	jasmonate ZIM domain-containing protein	GO:0009611//response to wounding;GO:0009620//response to fungus;GO:0009867//jasmonic acid mediated signaling pathway;GO:0009414//response to water deprivation;GO:0007275//multicellular organismal development;GO:0009693//ethylene biosynthetic process;GO:0010200//response to chitin;GO:0009733//response to auxin stimulus;GO:0042538//hyperosmotic salinity response;GO:0048856//anatomical structure dev…	GO:0005515//protein binding	GO:0005634//nucleus
CL1060.Contig8_All	1272	304	7.9838	330	8.2252	8	0.2154	gi|567150667|ref|XP_006416709.1|	131.3	2e-33	hypothetical protein EUTSA_v10008415mg [Eutrema salsugineum] >gi|557094480|gb|ESQ35062.1| hypothetical protein EUTSA_v10008415mg [Eutrema salsugineum]	gi|202070636|gb|AC172887.2|	159	1e-35	Brassica rapa subsp. pekinensis clone KBrS004B22, complete sequence	sp|Q9LDU5|TI11A_ARATH	227	5e-72	Protein TIFY 11A OS=Arabidopsis thaliana GN=TIFY11A PE=1 SV=1	--	--	--	--	--	K13464	3e-73	231	aly:ARALYDRAFT_312706	jasmonate ZIM domain-containing protein	GO:0009733//response to auxin stimulus;GO:0009693//ethylene biosynthetic process;GO:0009620//response to fungus;GO:0009414//response to water deprivation;GO:0009867//jasmonic acid mediated signaling pathway;GO:0009723//response to ethylene stimulus;GO:0009611//response to wounding;GO:0009695//jasmonic acid biosynthetic process;GO:0042538//hyperosmotic salinity response;GO:0009738//abscisic acid m…	GO:0005515//protein binding	GO:0005634//nucleus
CL1060.Contig9_All	1043	0	0	0	0	0	0	gi|567150667|ref|XP_006416709.1|	370.9	2e-127	hypothetical protein EUTSA_v10008415mg [Eutrema salsugineum] >gi|557094480|gb|ESQ35062.1| hypothetical protein EUTSA_v10008415mg [Eutrema salsugineum]	gi|202070636|gb|AC172887.2|	319	4e-84	Brassica rapa subsp. pekinensis clone KBrS004B22, complete sequence	sp|Q9LDU5|TI11A_ARATH	348	2e-120	Protein TIFY 11A OS=Arabidopsis thaliana GN=TIFY11A PE=1 SV=1	--	--	--	--	--	K13464	1e-124	360	aly:ARALYDRAFT_312706	jasmonate ZIM domain-containing protein	GO:0009611//response to wounding;GO:0009620//response to fungus;GO:0009867//jasmonic acid mediated signaling pathway;GO:0009414//response to water deprivation;GO:0007275//multicellular organismal development;GO:0009693//ethylene biosynthetic process;GO:0010200//response to chitin;GO:0009733//response to auxin stimulus;GO:0042538//hyperosmotic salinity response;GO:0048856//anatomical structure dev…	GO:0005515//protein binding	GO:0005634//nucleus
CL1061.Contig1_All	276	5	0.6052	0	0	28	3.4738	--	--	--	--	--	--	--	--	--	--	--	--	--	--	--	--	--	--	--	--	--	--	-	-	-
CL1061.Contig2_All	460	7	0.5084	12	0.8271	57	4.243	--	--	--	--	--	--	--	--	--	--	--	--	--	--	--	--	--	--	--	--	--	--	-	-	-
CL1062.Contig1_All	2165	102	1.5739	113	1.6548	41	0.6485	gi|567152215|ref|XP_006417146.1|	999.2	0	hypothetical protein EUTSA_v10007191mg [Eutrema salsugineum] >gi|557094917|gb|ESQ35499.1| hypothetical protein EUTSA_v10007191mg [Eutrema salsugineum]	gi|332189094|gb|CP002684.1|	1465	0	Arabidopsis thaliana chromosome 1, complete sequence	sp|Q03250|RBG7_ARATH	82	7e-18	Glycine-rich RNA-binding protein 7 OS=Arabidopsis thaliana GN=RBG7 PE=1 SV=1	DR0392	57.8	5e-08	COG2823	Predicted periplasmic or secreted lipoprotein	K14153	1e-21	101	ota:Ot12g00960	hydroxymethylpyrimidine kinase / phosphomethylpyrimidine kinase / thiamine-phosphate diphosphorylase [EC:2.7.1.49 2.7.4.7 2.5.1.3]	-	GO:0003723//RNA binding;GO:0000166//nucleotide binding	GO:0005634//nucleus
CL1062.Contig2_All	289	55	6.3575	31	3.4008	4	0.4739	gi|567152215|ref|XP_006417146.1|	196.8	5e-60	hypothetical protein EUTSA_v10007191mg [Eutrema salsugineum] >gi|557094917|gb|ESQ35499.1| hypothetical protein EUTSA_v10007191mg [Eutrema salsugineum]	gi|332189094|gb|CP002684.1|	297	4e-78	Arabidopsis thaliana chromosome 1, complete sequence	sp|P10495|GRP1_PHAVU	54.7	3e-10	Glycine-rich cell wall structural protein 1.0 OS=Phaseolus vulgaris PE=2 SV=1	XF0818	44.3	6e-06	COG2730	Endoglucanase	K12741	5e-09	52.8	cre:CHLREDRAFT_181880	heterogeneous nuclear ribonucleoprotein A1/A3	-	GO:0003723//RNA binding;GO:0000166//nucleotide binding	GO:0005634//nucleus
CL1062.Contig3_All	2192	126	1.9202	106	1.5331	48	0.7498	gi|567152215|ref|XP_006417146.1|	999.2	0	hypothetical protein EUTSA_v10007191mg [Eutrema salsugineum] >gi|557094917|gb|ESQ35499.1| hypothetical protein EUTSA_v10007191mg [Eutrema salsugineum]	gi|332189094|gb|CP002684.1|	1465	0	Arabidopsis thaliana chromosome 1, complete sequence	sp|Q03250|RBG7_ARATH	82	7e-18	Glycine-rich RNA-binding protein 7 OS=Arabidopsis thaliana GN=RBG7 PE=1 SV=1	DR0392	57.8	5e-08	COG2823	Predicted periplasmic or secreted lipoprotein	K14153	1e-21	101	ota:Ot12g00960	hydroxymethylpyrimidine kinase / phosphomethylpyrimidine kinase / thiamine-phosphate diphosphorylase [EC:2.7.1.49 2.7.4.7 2.5.1.3]	-	GO:0003723//RNA binding;GO:0000166//nucleotide binding	GO:0005634//nucleus
CL1063.Contig1_All	1723	0	0	0	0	0	0	gi|567175111|ref|XP_006400334.1|	792.7	0	hypothetical protein EUTSA_v10013587mg [Eutrema salsugineum] >gi|557101424|gb|ESQ41787.1| hypothetical protein EUTSA_v10013587mg [Eutrema salsugineum]	gi|145358152|ref|NM_121796.3|	979	0	Arabidopsis thaliana microfibrillar-associated protein 1 mRNA, complete cds	sp|Q8H0U8|RH42_ARATH	69.7	3e-12	DEAD-box ATP-dependent RNA helicase 42 OS=Arabidopsis thaliana GN=RH42 PE=1 SV=2	aq_2032	62.4	2e-09	COG0532	Translation initiation factor 2 (IF-2; GTPase)	K13110	0	775	aly:ARALYDRAFT_488655	microfibrillar-associated protein 1	-	-	GO:0005576//extracellular region;GO:0005634//nucleus;GO:0009507//chloroplast
CL1063.Contig2_All	1609	9	0.1869	11	0.2167	14	0.2979	gi|567175111|ref|XP_006400334.1|	790	0	hypothetical protein EUTSA_v10013587mg [Eutrema salsugineum] >gi|557101424|gb|ESQ41787.1| hypothetical protein EUTSA_v10013587mg [Eutrema salsugineum]	gi|145358152|ref|NM_121796.3|	1003	0	Arabidopsis thaliana microfibrillar-associated protein 1 mRNA, complete cds	sp|Q8H0U8|RH42_ARATH	69.3	4e-12	DEAD-box ATP-dependent RNA helicase 42 OS=Arabidopsis thaliana GN=RH42 PE=1 SV=2	aq_2032	62.4	2e-09	COG0532	Translation initiation factor 2 (IF-2; GTPase)	K13110	0	771	aly:ARALYDRAFT_488655	microfibrillar-associated protein 1	-	-	GO:0005576//extracellular region;GO:0005634//nucleus;GO:0009507//chloroplast
CL1063.Contig3_All	1690	165	3.2615	93	1.7447	71	1.4386	gi|567175111|ref|XP_006400334.1|	790	0	hypothetical protein EUTSA_v10013587mg [Eutrema salsugineum] >gi|557101424|gb|ESQ41787.1| hypothetical protein EUTSA_v10013587mg [Eutrema salsugineum]	gi|145358152|ref|NM_121796.3|	1003	0	Arabidopsis thaliana microfibrillar-associated protein 1 mRNA, complete cds	sp|Q8H0U8|RH42_ARATH	69.3	4e-12	DEAD-box ATP-dependent RNA helicase 42 OS=Arabidopsis thaliana GN=RH42 PE=1 SV=2	aq_2032	62.4	2e-09	COG0532	Translation initiation factor 2 (IF-2; GTPase)	K13110	0	771	aly:ARALYDRAFT_488655	microfibrillar-associated protein 1	-	-	GO:0005576//extracellular region;GO:0005634//nucleus;GO:0009507//chloroplast
CL1063.Contig4_All	1642	0	0	0	0	0	0	gi|567175111|ref|XP_006400334.1|	792.7	0	hypothetical protein EUTSA_v10013587mg [Eutrema salsugineum] >gi|557101424|gb|ESQ41787.1| hypothetical protein EUTSA_v10013587mg [Eutrema salsugineum]	gi|145358152|ref|NM_121796.3|	979	0	Arabidopsis thaliana microfibrillar-associated protein 1 mRNA, complete cds	sp|Q8H0U8|RH42_ARATH	69.7	3e-12	DEAD-box ATP-dependent RNA helicase 42 OS=Arabidopsis thaliana GN=RH42 PE=1 SV=2	aq_2032	62.4	2e-09	COG0532	Translation initiation factor 2 (IF-2; GTPase)	K13110	0	775	aly:ARALYDRAFT_488655	microfibrillar-associated protein 1	-	-	GO:0005576//extracellular region;GO:0005634//nucleus;GO:0009507//chloroplast
CL1063.Contig5_All	296	107	12.0758	104	11.1394	66	7.635	gi|297807805|ref|XP_002871786.1|	200.7	1e-62	hypothetical protein ARALYDRAFT_488655 [Arabidopsis lyrata subsp. lyrata] >gi|297317623|gb|EFH48045.1| hypothetical protein ARALYDRAFT_488655 [Arabidopsis lyrata subsp. lyrata]	gi|332656411|gb|CP002687.1|	367	5e-99	Arabidopsis thaliana chromosome 4, complete genome	--	--	--	--	--	--	--	--	--	K13110	4e-64	200	aly:ARALYDRAFT_488655	microfibrillar-associated protein 1	-	-	GO:0005576//extracellular region;GO:0005634//nucleus;GO:0009507//chloroplast
CL1064.Contig1_All	1161	18371	528.598	27103	740.122	8805	259.69	gi|5081419|gb|AAD39372.1|AF118381_1	495	4e-176	tonoplast intrinsic protein [Brassica napus]	gi|1514976|dbj|D84669.1|	1407	0	Raphanus sativus mRNA for VM23, complete sequence	sp|Q41963|TIP12_ARATH	476	8e-171	Aquaporin TIP1-2 OS=Arabidopsis thaliana GN=TIP1-2 PE=1 SV=2	MTH103	107	2e-26	COG0580	Glycerol uptake facilitator and related permeases (Major Intrinsic Protein Family)	K09873	2e-170	476	ath:AT3G26520	aquaporin TIP	GO:0009750//response to fructose stimulus;GO:0042744//hydrogen peroxide catabolic process;GO:0006833//water transport;GO:0080170//hydrogen peroxide transmembrane transport;GO:0009740//gibberellic acid mediated signaling pathway;GO:0009825//multidimensional cell growth;GO:0030003//cellular cation homeostasis;GO:0071918//urea transmembrane transport;GO:0006816//calcium ion transport;GO:0009651//res…	GO:0015250//water channel activity;GO:0015204//urea transmembrane transporter activity	GO:0009705//plant-type vacuole membrane;GO:0009941//chloroplast envelope;GO:0000326//protein storage vacuole;GO:0005794//Golgi apparatus;GO:0043674//columella;GO:0016021//integral to membrane;GO:0042807//central vacuole;GO:0005783//endoplasmic reticulum;GO:0005886//plasma membrane
CL1064.Contig2_All	1108	34857	1050.93	40539	1159.98	20937	647.043	gi|5081419|gb|AAD39372.1|AF118381_1	483.8	5e-172	tonoplast intrinsic protein [Brassica napus]	gi|5081418|gb|AF118381.1|AF118381	1134	0	Brassica napus tonoplast intrinsic protein (gamma-TIP2) mRNA, complete cds	sp|Q41963|TIP12_ARATH	474	5e-170	Aquaporin TIP1-2 OS=Arabidopsis thaliana GN=TIP1-2 PE=1 SV=2	MTH103	106	4e-26	COG0580	Glycerol uptake facilitator and related permeases (Major Intrinsic Protein Family)	K09873	1e-169	474	ath:AT3G26520	aquaporin TIP	GO:0009750//response to fructose stimulus;GO:0042744//hydrogen peroxide catabolic process;GO:0006833//water transport;GO:0080170//hydrogen peroxide transmembrane transport;GO:0009740//gibberellic acid mediated signaling pathway;GO:0009825//multidimensional cell growth;GO:0030003//cellular cation homeostasis;GO:0071918//urea transmembrane transport;GO:0006816//calcium ion transport;GO:0009651//res…	GO:0015250//water channel activity;GO:0015204//urea transmembrane transporter activity	GO:0009705//plant-type vacuole membrane;GO:0009941//chloroplast envelope;GO:0000326//protein storage vacuole;GO:0005794//Golgi apparatus;GO:0043674//columella;GO:0016021//integral to membrane;GO:0042807//central vacuole;GO:0005783//endoplasmic reticulum;GO:0005886//plasma membrane
CL1064.Contig3_All	993	33599	1130.32	18152	579.553	5348	184.417	gi|209892837|gb|ACI95283.1|	473	2e-168	tonoplast intrinsic protein [Sinapis arvensis]	gi|21284369|gb|U92651.2|BOU92651	1025	0	Brassica oleracea var. botrytis tonoplast intrinsic protein bobTIP26-1 mRNA, complete cds	sp|P25818|TIP11_ARATH	461	8e-166	Aquaporin TIP1-1 OS=Arabidopsis thaliana GN=TIP1-1 PE=1 SV=1	MTH103	102	6e-25	COG0580	Glycerol uptake facilitator and related permeases (Major Intrinsic Protein Family)	K09873	2e-165	461	ath:AT2G36830	aquaporin TIP	GO:0009750//response to fructose stimulus;GO:0042744//hydrogen peroxide catabolic process;GO:0006833//water transport;GO:0080170//hydrogen peroxide transmembrane transport;GO:0009740//gibberellic acid mediated signaling pathway;GO:0009825//multidimensional cell growth;GO:0030003//cellular cation homeostasis;GO:0071918//urea transmembrane transport;GO:0006816//calcium ion transport;GO:0009651//res…	GO:0015250//water channel activity;GO:0015204//urea transmembrane transporter activity	GO:0009705//plant-type vacuole membrane;GO:0009941//chloroplast envelope;GO:0000326//protein storage vacuole;GO:0005794//Golgi apparatus;GO:0043674//columella;GO:0016021//integral to membrane;GO:0042807//central vacuole;GO:0005783//endoplasmic reticulum;GO:0005886//plasma membrane
CL1065.Contig1_All	408	16	1.31	20	1.5541	7	0.5875	gi|297814604|ref|XP_002875185.1|	256.9	1e-84	predicted protein [Arabidopsis lyrata subsp. lyrata] >gi|297321023|gb|EFH51444.1| predicted protein [Arabidopsis lyrata subsp. lyrata]	gi|334184117|ref|NM_001084404.2|	523	1e-146	Arabidopsis thaliana protein agamous-like 30 mRNA, complete cds	--	--	--	--	--	--	--	--	--	--	--	--	--	--	GO:0010584//pollen exine formation;GO:0006355//regulation of transcription, DNA-dependent	GO:0003677//DNA binding;GO:0046983//protein dimerization activity;GO:0003700//sequence-specific DNA binding transcription factor activity	GO:0005634//nucleus
CL1065.Contig2_All	969	55	1.8961	96	3.141	71	2.509	gi|567142910|ref|XP_006395741.1|	466.1	7e-164	hypothetical protein EUTSA_v10004409mg [Eutrema salsugineum] >gi|557092380|gb|ESQ33027.1| hypothetical protein EUTSA_v10004409mg [Eutrema salsugineum]	gi|334184117|ref|NM_001084404.2|	630	1e-178	Arabidopsis thaliana protein agamous-like 30 mRNA, complete cds	--	--	--	--	--	--	--	--	--	--	--	--	--	--	GO:0010584//pollen exine formation;GO:0006355//regulation of transcription, DNA-dependent	GO:0003677//DNA binding;GO:0046983//protein dimerization activity;GO:0003700//sequence-specific DNA binding transcription factor activity	GO:0005634//nucleus
CL1065.Contig3_All	1389	68	1.6354	69	1.5749	68	1.6764	gi|297814604|ref|XP_002875185.1|	607.8	0	predicted protein [Arabidopsis lyrata subsp. lyrata] >gi|297321023|gb|EFH51444.1| predicted protein [Arabidopsis lyrata subsp. lyrata]	gi|334184117|ref|NM_001084404.2|	1033	0	Arabidopsis thaliana protein agamous-like 30 mRNA, complete cds	sp|Q9ATE5|FBP24_PETHY	85.1	2e-18	MADS-box protein FBP24 OS=Petunia hybrida GN=FBP24 PE=1 SV=1	YPL089c	54.7	3e-07	COG5068	Regulator of arginine metabolism and related MADS box-containing transcription factors	K09265	4e-28	116	ppp:PHYPADRAFT_209690	MADS-box transcription factor, other eukaryote	GO:0010584//pollen exine formation;GO:0006355//regulation of transcription, DNA-dependent	GO:0003677//DNA binding;GO:0046983//protein dimerization activity;GO:0003700//sequence-specific DNA binding transcription factor activity	GO:0005634//nucleus
CL1065.Contig4_All	256	5	0.6525	7	0.8669	3	0.4013	gi|567142910|ref|XP_006395741.1|	122.5	2e-33	hypothetical protein EUTSA_v10004409mg [Eutrema salsugineum] >gi|557092380|gb|ESQ33027.1| hypothetical protein EUTSA_v10004409mg [Eutrema salsugineum]	gi|199580261|gb|AC189567.2|	339	1e-90	Brassica rapa subsp. pekinensis clone KBrH009H15, complete sequence	--	--	--	--	--	--	--	--	--	--	--	--	--	--	GO:0010584//pollen exine formation;GO:0006355//regulation of transcription, DNA-dependent	GO:0003677//DNA binding;GO:0046983//protein dimerization activity	GO:0005634//nucleus
CL1066.Contig1_All	339	21	2.0694	8	0.7482	16	1.6161	gi|567171457|ref|XP_006399248.1|	187.2	8e-57	hypothetical protein EUTSA_v10013413mg [Eutrema salsugineum] >gi|557100338|gb|ESQ40701.1| hypothetical protein EUTSA_v10013413mg [Eutrema salsugineum]	gi|38260604|gb|AY350711.1|	258	4e-66	Sisymbrium irio clone BAC Sio11E11, complete sequence	sp|Q8VYT5|FB254_ARATH	175	3e-54	F-box protein At5g07670 OS=Arabidopsis thaliana GN=At5g07670 PE=2 SV=1	--	--	--	--	--	--	--	--	--	--	-	-	GO:0005634//nucleus
CL1066.Contig2_All	1690	299	5.9103	198	3.7145	482	9.766	gi|567171457|ref|XP_006399248.1|	777.7	0	hypothetical protein EUTSA_v10013413mg [Eutrema salsugineum] >gi|557100338|gb|ESQ40701.1| hypothetical protein EUTSA_v10013413mg [Eutrema salsugineum]	gi|222423581|dbj|AK317068.1|	868	0	Arabidopsis thaliana AT5G07670 mRNA, complete cds, clone: RAFL21-16-A18	sp|Q8VYT5|FB254_ARATH	734	0	F-box protein At5g07670 OS=Arabidopsis thaliana GN=At5g07670 PE=2 SV=1	--	--	--	--	--	K10268	2e-22	102	smo:SELMODRAFT_118815	F-box and leucine-rich repeat protein 2/20	-	-	GO:0005634//nucleus
CL1066.Contig3_All	1554	142	3.0525	64	1.3057	280	6.1697	gi|567171457|ref|XP_006399248.1|	609.4	0	hypothetical protein EUTSA_v10013413mg [Eutrema salsugineum] >gi|557100338|gb|ESQ40701.1| hypothetical protein EUTSA_v10013413mg [Eutrema salsugineum]	gi|38260604|gb|AY350711.1|	615	1e-173	Sisymbrium irio clone BAC Sio11E11, complete sequence	sp|Q8VYT5|FB254_ARATH	575	0	F-box protein At5g07670 OS=Arabidopsis thaliana GN=At5g07670 PE=2 SV=1	--	--	--	--	--	K10268	6e-17	85.1	smo:SELMODRAFT_118815	F-box and leucine-rich repeat protein 2/20	-	-	GO:0005634//nucleus
CL1067.Contig1_All	1492	442	9.8964	376	7.9898	52	1.1934	gi|297806601|ref|XP_002871184.1|	777.7	0	UDP-glucosyl transferase 76C1 [Arabidopsis lyrata subsp. lyrata] >gi|297317021|gb|EFH47443.1| UDP-glucosyl transferase 76C1 [Arabidopsis lyrata subsp. lyrata]	gi|297806600|ref|XM_002871138.1|	1235	0	Arabidopsis lyrata subsp. lyrata UDP-glucosyl transferase 76C1 (UGT76C1), mRNA	sp|Q9FI99|U76C1_ARATH	757	0	UDP-glycosyltransferase 76C1 OS=Arabidopsis thaliana GN=UGT76C1 PE=1 SV=1	--	--	--	--	--	K13493	0	757	ath:AT5G05870	cytokinin-N-glucosyltransferase [EC:2.4.1.-]	GO:0048316//seed development;GO:0006310//DNA recombination;GO:0006281//DNA repair;GO:1900000//regulation of anthocyanin catabolic process;GO:0046685//response to arsenic-containing substance;GO:0009690//cytokinin metabolic process	GO:0047807//cytokinin 7-beta-glucosyltransferase activity;GO:0080062//cytokinin 9-beta-glucosyltransferase activity	GO:0005634//nucleus
CL1067.Contig2_All	200	14	2.3384	0	0	0	0	gi|15239288|ref|NP_196209.1|	113.6	6e-30	UDP-glycosyltransferase 76C3 [Arabidopsis thaliana] >gi|75262507|sp|Q9FI96.1|U76C3_ARATH RecName: Full=UDP-glycosyltransferase 76C3 >gi|10177563|dbj|BAB10795.1| glucuronosyl transferase-like protein [Arabidopsis thaliana] >gi|332003554|gb|AED90937.1| UDP-glycosyltransferase 76C3 [Arabidopsis thaliana] >gi|591401826|gb|AHL38640.1| glycosyltransferase, partial [Arabidopsis thaliana]	gi|332002898|gb|CP002688.1|	226	8e-57	Arabidopsis thaliana chromosome 5, complete sequence	sp|Q9FI96|U76C3_ARATH	113	9e-32	UDP-glycosyltransferase 76C3 OS=Arabidopsis thaliana GN=UGT76C3 PE=3 SV=1	--	--	--	--	--	K13493	2e-28	105	ath:AT5G05860	cytokinin-N-glucosyltransferase [EC:2.4.1.-]	GO:0048316//seed development;GO:0006310//DNA recombination;GO:0006281//DNA repair;GO:1900000//regulation of anthocyanin catabolic process;GO:0046685//response to arsenic-containing substance;GO:0009690//cytokinin metabolic process	GO:0047807//cytokinin 7-beta-glucosyltransferase activity;GO:0080062//cytokinin 9-beta-glucosyltransferase activity	GO:0005634//nucleus
CL1067.Contig3_All	1553	742	15.9609	49	1.0003	92	2.0285	gi|567170799|ref|XP_006399048.1|	796.6	0	hypothetical protein EUTSA_v10013513mg [Eutrema salsugineum] >gi|557100138|gb|ESQ40501.1| hypothetical protein EUTSA_v10013513mg [Eutrema salsugineum]	gi|110743986|gb|AC189201.1|	1213	0	Brassica rapa subsp. pekinensis clone KBrB005N03, complete sequence	sp|Q9FIA0|U76C2_ARATH	757	0	UDP-glycosyltransferase 76C2 OS=Arabidopsis thaliana GN=UGT76C2 PE=1 SV=1	CAC2716	51.2	3e-06	COG1819	Glycosyl transferases, related to UDP-glucuronosyltransferase	K13493	0	757	ath:AT5G05860	cytokinin-N-glucosyltransferase [EC:2.4.1.-]	GO:0048316//seed development;GO:0006310//DNA recombination;GO:0006281//DNA repair;GO:1900000//regulation of anthocyanin catabolic process;GO:0046685//response to arsenic-containing substance;GO:0009690//cytokinin metabolic process	GO:0047807//cytokinin 7-beta-glucosyltransferase activity;GO:0080062//cytokinin 9-beta-glucosyltransferase activity	GO:0005634//nucleus
CL1068.Contig1_All	735	500	22.7252	58	2.5018	27	1.2579	gi|297803340|ref|XP_002869554.1|	113.6	8e-31	hypothetical protein ARALYDRAFT_492021 [Arabidopsis lyrata subsp. lyrata] >gi|297315390|gb|EFH45813.1| hypothetical protein ARALYDRAFT_492021 [Arabidopsis lyrata subsp. lyrata]	gi|110744022|gb|AC189237.1|	408	1e-111	Brassica rapa subsp. pekinensis clone KBrB014O06, complete sequence	--	--	--	--	--	--	--	--	--	--	--	--	--	--	-	-	GO:0005739//mitochondrion
CL1068.Contig2_All	211	11	1.7415	0	0	0	0	--	--	--	--	--	--	--	--	--	--	--	--	--	--	--	--	--	--	--	--	--	--	-	-	-
CL1069.Contig1_All	1459	391	8.9525	675	14.6679	203	4.7643	gi|567201383|ref|XP_006407686.1|	686.4	0	hypothetical protein EUTSA_v10020978mg [Eutrema salsugineum] >gi|557108832|gb|ESQ49139.1| hypothetical protein EUTSA_v10020978mg [Eutrema salsugineum]	gi|297829463|ref|XM_002882568.1|	1231	0	Arabidopsis lyrata subsp. lyrata armadillo/beta-catenin repeat family protein, mRNA	sp|Q9LM76|PUB44_ARATH	49.3	5e-06	U-box domain-containing protein 44 OS=Arabidopsis thaliana GN=PUB44 PE=1 SV=1	--	--	--	--	--	K09562	0	674	aly:ARALYDRAFT_478250	hsp70-interacting protein	GO:0006457//protein folding;GO:0009644//response to high light intensity;GO:0042542//response to hydrogen peroxide;GO:0009408//response to heat;GO:0009651//response to salt stress	GO:0030544//Hsp70 protein binding	GO:0005737//cytoplasm;GO:0005634//nucleus
CL1069.Contig2_All	531	111	6.9832	73	4.3586	55	3.5467	gi|567201383|ref|XP_006407686.1|	279.6	5e-93	hypothetical protein EUTSA_v10020978mg [Eutrema salsugineum] >gi|557108832|gb|ESQ49139.1| hypothetical protein EUTSA_v10020978mg [Eutrema salsugineum]	gi|199580086|gb|AC189394.2|	585	1e-164	Brassica rapa subsp. pekinensis clone KBrB055G10, complete sequence	--	--	--	--	--	--	--	--	--	K09562	6e-93	275	aly:ARALYDRAFT_478250	hsp70-interacting protein	GO:0006457//protein folding;GO:0009644//response to high light intensity;GO:0042542//response to hydrogen peroxide;GO:0009408//response to heat;GO:0009651//response to salt stress	GO:0030544//Hsp70 protein binding	GO:0005737//cytoplasm;GO:0005634//nucleus
CL1069.Contig3_All	1230	279	7.5775	314	8.0936	134	3.7304	gi|567201383|ref|XP_006407686.1|	690.3	0	hypothetical protein EUTSA_v10020978mg [Eutrema salsugineum] >gi|557108832|gb|ESQ49139.1| hypothetical protein EUTSA_v10020978mg [Eutrema salsugineum]	gi|42463475|emb|BX823625.1|	1189	0	Arabidopsis thaliana Full-length cDNA Complete sequence from clone GSLTLS59ZD10 of Adult vegetative tissue of strain col-0 of Arabidopsis thaliana (thale cress)	sp|Q9LM76|PUB44_ARATH	49.3	4e-06	U-box domain-containing protein 44 OS=Arabidopsis thaliana GN=PUB44 PE=1 SV=1	--	--	--	--	--	K09562	0	679	aly:ARALYDRAFT_478250	hsp70-interacting protein	GO:0006457//protein folding;GO:0009644//response to high light intensity;GO:0042542//response to hydrogen peroxide;GO:0009408//response to heat;GO:0009651//response to salt stress	GO:0030544//Hsp70 protein binding	GO:0005737//cytoplasm;GO:0005634//nucleus
CL1069.Contig4_All	751	55	2.4465	62	2.6174	39	1.7782	gi|567169494|ref|XP_006398680.1|	155.6	4e-107	hypothetical protein EUTSA_v10014140mg [Eutrema salsugineum] >gi|557099770|gb|ESQ40133.1| hypothetical protein EUTSA_v10014140mg [Eutrema salsugineum]	gi|186519349|ref|NM_001036745.2|	729	0	Arabidopsis thaliana protein Fes1C mRNA, complete cds	--	--	--	--	--	--	--	--	--	K09562	5e-103	242	aly:ARALYDRAFT_486992	hsp70-interacting protein	GO:0006457//protein folding;GO:0009644//response to high light intensity;GO:0042542//response to hydrogen peroxide;GO:0009408//response to heat;GO:0009651//response to salt stress	GO:0030544//Hsp70 protein binding	GO:0005737//cytoplasm;GO:0005634//nucleus
CL107.Contig1_All	1068	1887	59.0235	39	1.1577	21	0.6733	gi|3098571|gb|AAC15700.1|	538.9	0	BURP domain containing protein [Brassica napus] >gi|226427141|gb|ACO54860.1| BURP domain protein [Brassica napus] >gi|226427143|gb|ACO54861.1| BURP domain protein [Brassica napus]	gi|226427144|gb|FJ204001.1|	1376	0	Brassica napus BURP domain protein (BNM2C) mRNA, complete cds	sp|Q08298|RD22_ARATH	149	1e-41	Dehydration-responsive protein RD22 OS=Arabidopsis thaliana GN=RD22 PE=2 SV=1	--	--	--	--	--	--	--	--	--	--	GO:0048316//seed development	-	GO:0005576//extracellular region;GO:0000326//protein storage vacuole
CL107.Contig2_All	1137	1799	52.8561	643	17.9295	92	2.7707	gi|3098571|gb|AAC15700.1|	491.5	2e-174	BURP domain containing protein [Brassica napus] >gi|226427141|gb|ACO54860.1| BURP domain protein [Brassica napus] >gi|226427143|gb|ACO54861.1| BURP domain protein [Brassica napus]	gi|226427144|gb|FJ204001.1|	868	0	Brassica napus BURP domain protein (BNM2C) mRNA, complete cds	sp|Q08298|RD22_ARATH	149	4e-41	Dehydration-responsive protein RD22 OS=Arabidopsis thaliana GN=RD22 PE=2 SV=1	--	--	--	--	--	--	--	--	--	--	GO:0048316//seed development	-	GO:0005576//extracellular region;GO:0000326//protein storage vacuole
CL107.Contig3_All	1025	72	2.3466	12	0.3712	2	0.0668	gi|3098571|gb|AAC15700.1|	515	0	BURP domain containing protein [Brassica napus] >gi|226427141|gb|ACO54860.1| BURP domain protein [Brassica napus] >gi|226427143|gb|ACO54861.1| BURP domain protein [Brassica napus]	gi|226427144|gb|FJ204001.1|	1126	0	Brassica napus BURP domain protein (BNM2C) mRNA, complete cds	sp|Q08298|RD22_ARATH	149	9e-42	Dehydration-responsive protein RD22 OS=Arabidopsis thaliana GN=RD22 PE=2 SV=1	--	--	--	--	--	--	--	--	--	--	GO:0048316//seed development	-	GO:0005576//extracellular region;GO:0000326//protein storage vacuole
CL107.Contig4_All	1065	30	0.941	4	0.1191	2	0.0643	gi|3098571|gb|AAC15700.1|	497.7	2e-177	BURP domain containing protein [Brassica napus] >gi|226427141|gb|ACO54860.1| BURP domain protein [Brassica napus] >gi|226427143|gb|ACO54861.1| BURP domain protein [Brassica napus]	gi|226427144|gb|FJ204001.1|	1007	0	Brassica napus BURP domain protein (BNM2C) mRNA, complete cds	sp|Q08298|RD22_ARATH	146	2e-40	Dehydration-responsive protein RD22 OS=Arabidopsis thaliana GN=RD22 PE=2 SV=1	--	--	--	--	--	--	--	--	--	--	GO:0048316//seed development	-	GO:0005576//extracellular region;GO:0000326//protein storage vacuole
CL107.Contig5_All	1080	443	13.7027	0	0	0	0	gi|3098571|gb|AAC15700.1|	461.8	5e-163	BURP domain containing protein [Brassica napus] >gi|226427141|gb|ACO54860.1| BURP domain protein [Brassica napus] >gi|226427143|gb|ACO54861.1| BURP domain protein [Brassica napus]	gi|199580225|gb|AC189534.2|	1366	0	Brassica rapa subsp. pekinensis clone KBrH001J06, complete sequence	sp|Q08298|RD22_ARATH	144	1e-39	Dehydration-responsive protein RD22 OS=Arabidopsis thaliana GN=RD22 PE=2 SV=1	--	--	--	--	--	--	--	--	--	--	GO:0048316//seed development	-	GO:0005576//extracellular region;GO:0000326//protein storage vacuole
CL1070.Contig1_All	1549	501	10.8047	227	4.6461	753	16.6457	gi|567200957|ref|XP_006407566.1|	792.3	0	hypothetical protein EUTSA_v10020743mg [Eutrema salsugineum] >gi|557108712|gb|ESQ49019.1| hypothetical protein EUTSA_v10020743mg [Eutrema salsugineum]	gi|186509955|ref|NM_111880.4|	1126	0	Arabidopsis thaliana serine carboxypeptidase-like 7 mRNA, complete cds	sp|Q9SQX6|SCP7_ARATH	741	0	Serine carboxypeptidase-like 7 OS=Arabidopsis thaliana GN=SCPL7 PE=2 SV=1	SPAC19G12.10c_2	146	4e-38	COG2939	Carboxypeptidase C (cathepsin A)	K09756	0	524	ath:AT5G09640	serine carboxypeptidase-like 19 [EC:3.4.16.- 2.3.1.91]	GO:0006508//proteolysis	GO:0004185//serine-type carboxypeptidase activity	GO:0005576//extracellular region
CL1070.Contig2_All	1658	349	7.0318	242	4.6275	572	11.8133	gi|567190884|ref|XP_006404766.1|	782.7	0	hypothetical protein EUTSA_v10000651mg [Eutrema salsugineum] >gi|557105894|gb|ESQ46219.1| hypothetical protein EUTSA_v10000651mg [Eutrema salsugineum]	gi|145360228|ref|NM_127863.4|	910	0	Arabidopsis thaliana serine carboxypeptidase-like 13 mRNA, complete cds	sp|Q8H780|SCP13_ARATH	711	0	Serine carboxypeptidase-like 13 OS=Arabidopsis thaliana GN=SCPL13 PE=2 SV=2	SPAC19G12.10c_2	152	4e-40	COG2939	Carboxypeptidase C (cathepsin A)	K09756	0	527	ath:AT5G09640	serine carboxypeptidase-like 19 [EC:3.4.16.- 2.3.1.91]	GO:0009684//indoleacetic acid biosynthetic process;GO:0009108//coenzyme biosynthetic process;GO:0006733//oxidoreduction coenzyme metabolic process;GO:0009117//nucleotide metabolic process;GO:0006766//vitamin metabolic process;GO:0009698//phenylpropanoid metabolic process;GO:0019288//isopentenyl diphosphate biosynthetic process, mevalonate-independent pathway;GO:0009695//jasmonic acid biosynthetic…	GO:0016754//sinapoylglucose-malate O-sinapoyltransferase activity;GO:0004185//serine-type carboxypeptidase activity	GO:0009505//plant-type cell wall;GO:0005576//extracellular region
CL1070.Contig3_All	1581	53	1.1199	182	3.6497	355	7.6887	gi|567200957|ref|XP_006407566.1|	806.6	0	hypothetical protein EUTSA_v10020743mg [Eutrema salsugineum] >gi|557108712|gb|ESQ49019.1| hypothetical protein EUTSA_v10020743mg [Eutrema salsugineum]	gi|186509955|ref|NM_111880.4|	1253	0	Arabidopsis thaliana serine carboxypeptidase-like 7 mRNA, complete cds	sp|Q9SQX6|SCP7_ARATH	758	0	Serine carboxypeptidase-like 7 OS=Arabidopsis thaliana GN=SCPL7 PE=2 SV=1	SPAC19G12.10c_2	144	3e-37	COG2939	Carboxypeptidase C (cathepsin A)	K09756	0	520	ath:AT5G09640	serine carboxypeptidase-like 19 [EC:3.4.16.- 2.3.1.91]	GO:0006508//proteolysis	GO:0004185//serine-type carboxypeptidase activity	GO:0005576//extracellular region;GO:0009505//plant-type cell wall
CL1070.Contig4_All	1623	83	1.7084	68	1.3283	283	5.9707	gi|567200957|ref|XP_006407566.1|	798.9	0	hypothetical protein EUTSA_v10020743mg [Eutrema salsugineum] >gi|557108712|gb|ESQ49019.1| hypothetical protein EUTSA_v10020743mg [Eutrema salsugineum]	gi|186509955|ref|NM_111880.4|	1158	0	Arabidopsis thaliana serine carboxypeptidase-like 7 mRNA, complete cds	sp|Q9SQX6|SCP7_ARATH	745	0	Serine carboxypeptidase-like 7 OS=Arabidopsis thaliana GN=SCPL7 PE=2 SV=1	SPAC19G12.10c_2	149	9e-39	COG2939	Carboxypeptidase C (cathepsin A)	K09756	0	521	ath:AT5G09640	serine carboxypeptidase-like 19 [EC:3.4.16.- 2.3.1.91]	GO:0006508//proteolysis	GO:0004185//serine-type carboxypeptidase activity	GO:0005576//extracellular region;GO:0009505//plant-type cell wall
CL1070.Contig5_All	211	2	0.3166	12	1.8031	49	7.9519	gi|62320202|dbj|BAD94430.1|	137.5	2e-40	putative glucose acyltransferase [Arabidopsis thaliana]	gi|186509955|ref|NM_111880.4|	274	4e-71	Arabidopsis thaliana serine carboxypeptidase-like 7 mRNA, complete cds	sp|Q9SQX6|SCP7_ARATH	137	1e-40	Serine carboxypeptidase-like 7 OS=Arabidopsis thaliana GN=SCPL7 PE=2 SV=1	YBR139w	68.9	5e-15	COG2939	Carboxypeptidase C (cathepsin A)	K09756	4e-28	105	ath:AT5G09640	serine carboxypeptidase-like 19 [EC:3.4.16.- 2.3.1.91]	GO:0006508//proteolysis	GO:0004185//serine-type carboxypeptidase activity	GO:0005576//extracellular region
CL1070.Contig6_All	632	108	5.7086	0	0	0	0	gi|567122155|ref|XP_006390568.1|	350.5	2e-119	hypothetical protein EUTSA_v10018572mg [Eutrema salsugineum] >gi|557087002|gb|ESQ27854.1| hypothetical protein EUTSA_v10018572mg [Eutrema salsugineum]	gi|30698931|ref|NM_105988.2|	620	1e-175	Arabidopsis thaliana serine carboxypeptidase-like 5 mRNA, complete cds	sp|Q9CAU3|SCP2_ARATH	335	2e-115	Serine carboxypeptidase-like 2 OS=Arabidopsis thaliana GN=SCPL2 PE=2 SV=1	YMR297w	103	5e-25	COG2939	Carboxypeptidase C (cathepsin A)	K09756	1e-74	233	ath:AT5G09640	serine carboxypeptidase-like 19 [EC:3.4.16.- 2.3.1.91]	GO:0006508//proteolysis	GO:0004185//serine-type carboxypeptidase activity	GO:0005576//extracellular region;GO:0009505//plant-type cell wall
CL1070.Contig7_All	542	0	0	0	0	0	0	gi|567122155|ref|XP_006390568.1|	323.2	4e-109	hypothetical protein EUTSA_v10018572mg [Eutrema salsugineum] >gi|557087002|gb|ESQ27854.1| hypothetical protein EUTSA_v10018572mg [Eutrema salsugineum]	gi|18410319|ref|NM_105987.1|	585	1e-164	Arabidopsis thaliana serine carboxypeptidase-like 3 mRNA, complete cds	sp|Q9CAU4|SCP4_ARATH	318	5e-109	Serine carboxypeptidase-like 4 OS=Arabidopsis thaliana GN=SCPL4 PE=2 SV=1	YMR297w	104	8e-26	COG2939	Carboxypeptidase C (cathepsin A)	K09756	7e-74	230	ath:AT5G09640	serine carboxypeptidase-like 19 [EC:3.4.16.- 2.3.1.91]	GO:0006508//proteolysis	GO:0004185//serine-type carboxypeptidase activity	GO:0005576//extracellular region
CL1070.Contig8_All	255	8	1.048	22	2.7353	38	5.1027	gi|62320202|dbj|BAD94430.1|	144.1	1e-42	putative glucose acyltransferase [Arabidopsis thaliana]	gi|186509955|ref|NM_111880.4|	295	1e-77	Arabidopsis thaliana serine carboxypeptidase-like 7 mRNA, complete cds	sp|Q9SQX6|SCP7_ARATH	144	6e-43	Serine carboxypeptidase-like 7 OS=Arabidopsis thaliana GN=SCPL7 PE=2 SV=1	SPAC19G12.10c_2	63.9	5e-13	COG2939	Carboxypeptidase C (cathepsin A)	K09756	6e-29	108	ath:AT5G09640	serine carboxypeptidase-like 19 [EC:3.4.16.- 2.3.1.91]	GO:0006508//proteolysis	GO:0004185//serine-type carboxypeptidase activity	GO:0005576//extracellular region
CL1071.Contig1_All	643	77	4.0004	6	0.2958	34	1.8106	gi|312283159|dbj|BAJ34445.1|	357.1	6e-125	unnamed protein product [Thellungiella halophila]	gi|312283158|dbj|AK353359.1|	539	1e-150	Thellungiella halophila mRNA, complete cds, clone: RTFL01-25-A21	sp|Q9XIF8|GSTUG_ARATH	345	6e-122	Glutathione S-transferase U16 OS=Arabidopsis thaliana GN=GSTU16 PE=2 SV=1	HI1441	50.1	5e-07	COG0625	Glutathione S-transferase	K00799	9e-83	246	vvi:100245065	glutathione S-transferase [EC:2.5.1.18]	GO:0009628//response to abiotic stimulus;GO:1901700;GO:0009791//post-embryonic development;GO:0010583//response to cyclopentenone;GO:0009407//toxin catabolic process;GO:0006950//response to stress	GO:0004364//glutathione transferase activity	GO:0005737//cytoplasm
CL1072.Contig1_All	1690	1674	33.0897	2560	48.0255	1453	29.44	gi|567184597|ref|XP_006403029.1|	822	0	hypothetical protein EUTSA_v10005911mg [Eutrema salsugineum] >gi|557104128|gb|ESQ44482.1| hypothetical protein EUTSA_v10005911mg [Eutrema salsugineum]	gi|145339557|ref|NM_115463.3|	1277	0	Arabidopsis thaliana protein kinase family protein mRNA, complete cds	sp|Q9LYN6|Y3565_ARATH	802	0	Probable inactive receptor-like protein kinase At3g56050 OS=Arabidopsis thaliana GN=At3g56050 PE=2 SV=1	lin1934_1	58.5	1e-08	COG0515	Serine/threonine protein kinase	K13418	5e-34	137	ath:AT1G71830	somatic embryogenesis receptor kinase 1 [EC:2.7.10.1 2.7.11.1]	GO:0031348//negative regulation of defense response;GO:0009862//systemic acquired resistance, salicylic acid mediated signaling pathway;GO:0010363//regulation of plant-type hypersensitive response;GO:0006612//protein targeting to membrane;GO:0009625//response to insect;GO:0006468//protein phosphorylation;GO:0009963//positive regulation of flavonoid biosynthetic process;GO:0002237//response to mol…	GO:0004672//protein kinase activity;GO:0005524//ATP binding	GO:0005886//plasma membrane
CL1072.Contig2_All	382	73	6.3839	89	7.3866	31	2.7788	gi|567184594|ref|XP_006403028.1|	217.6	4e-68	hypothetical protein EUTSA_v10005911mg [Eutrema salsugineum] >gi|557104127|gb|ESQ44481.1| hypothetical protein EUTSA_v10005911mg [Eutrema salsugineum]	gi|297820349|ref|XM_002878012.1|	167	1e-38	Arabidopsis lyrata subsp. lyrata kinase family protein, mRNA	sp|Q9LYN6|Y3565_ARATH	210	4e-67	Probable inactive receptor-like protein kinase At3g56050 OS=Arabidopsis thaliana GN=At3g56050 PE=2 SV=1	--	--	--	--	--	K04733	8e-10	56.2	smo:SELMODRAFT_230241	interleukin-1 receptor-associated kinase 4 [EC:2.7.11.1]	GO:0031348//negative regulation of defense response;GO:0009862//systemic acquired resistance, salicylic acid mediated signaling pathway;GO:0010363//regulation of plant-type hypersensitive response;GO:0006612//protein targeting to membrane;GO:0009625//response to insect;GO:0006468//protein phosphorylation;GO:0009963//positive regulation of flavonoid biosynthetic process;GO:0002237//response to mol…	GO:0004672//protein kinase activity;GO:0005524//ATP binding	GO:0005886//plasma membrane
CL1073.Contig1_All	1008	125	4.1426	130	4.0888	51	1.7325	gi|89257438|gb|ABD64930.1|	42	5e-11	hypothetical protein 24.t00076 [Brassica oleracea]	gi|89257416|gb|AC183493.1|	153	5e-34	Brassica oleracea Contig B, complete sequence	--	--	--	--	--	--	--	--	--	--	--	--	--	--	-	-	-
CL1073.Contig2_All	919	33	1.1996	33	1.1385	28	1.0433	gi|89257438|gb|ABD64930.1|	27.3	2e-14	hypothetical protein 24.t00076 [Brassica oleracea]	gi|89257416|gb|AC183493.1|	153	5e-34	Brassica oleracea Contig B, complete sequence	--	--	--	--	--	--	--	--	--	--	--	--	--	--	-	-	-
CL1074.Contig1_All	1064	56	1.7582	107	3.1883	30	0.9655	gi|567202965|ref|XP_006408112.1|	175.6	5e-146	hypothetical protein EUTSA_v10021106mg [Eutrema salsugineum] >gi|557109258|gb|ESQ49565.1| hypothetical protein EUTSA_v10021106mg [Eutrema salsugineum]	gi|145338131|ref|NM_111382.4|	795	0	Arabidopsis thaliana S-adenosylmethionine-dependent methyltransferase domain-containing protein mRNA, complete cds	--	--	--	--	--	--	--	--	--	--	--	--	--	--	GO:0032259//methylation	GO:0008168//methyltransferase activity	-
CL1074.Contig2_All	1343	0	0	0	0	0	0	gi|567202965|ref|XP_006408112.1|	428.3	1e-147	hypothetical protein EUTSA_v10021106mg [Eutrema salsugineum] >gi|557109258|gb|ESQ49565.1| hypothetical protein EUTSA_v10021106mg [Eutrema salsugineum]	gi|110797009|gb|AC189329.1|	751	0	Brassica rapa subsp. pekinensis clone KBrB037C07, complete sequence	--	--	--	--	--	--	--	--	--	--	--	--	--	--	GO:0032259//methylation	GO:0008168//methyltransferase activity	-
CL1074.Contig3_All	1306	0	0	0	0	0	0	gi|567202965|ref|XP_006408112.1|	428.3	8e-148	hypothetical protein EUTSA_v10021106mg [Eutrema salsugineum] >gi|557109258|gb|ESQ49565.1| hypothetical protein EUTSA_v10021106mg [Eutrema salsugineum]	gi|110797009|gb|AC189329.1|	751	0	Brassica rapa subsp. pekinensis clone KBrB037C07, complete sequence	--	--	--	--	--	--	--	--	--	--	--	--	--	--	GO:0032259//methylation	GO:0008168//methyltransferase activity	-
CL1074.Contig4_All	998	132	4.4184	217	6.8936	119	4.083	gi|567140194|ref|XP_006394996.1|	522.7	0	hypothetical protein EUTSA_v10004543mg [Eutrema salsugineum] >gi|557091635|gb|ESQ32282.1| hypothetical protein EUTSA_v10004543mg [Eutrema salsugineum]	gi|145338131|ref|NM_111382.4|	434	1e-119	Arabidopsis thaliana S-adenosylmethionine-dependent methyltransferase domain-containing protein mRNA, complete cds	--	--	--	--	--	--	--	--	--	--	--	--	--	--	GO:0032259//methylation	GO:0008168//methyltransferase activity	-
CL1074.Contig5_All	4450	3890	29.2021	2326	16.5717	814	6.2636	gi|567207713|ref|XP_006409379.1|	1639	0	hypothetical protein EUTSA_v10022547mg [Eutrema salsugineum] >gi|557110541|gb|ESQ50832.1| hypothetical protein EUTSA_v10022547mg [Eutrema salsugineum]	gi|297795236|ref|XM_002865457.1|	3269	0	Arabidopsis lyrata subsp. lyrata metalloendopeptidase/ metallopeptidase/ zinc ion binding protein, mRNA	--	--	--	--	--	--	--	--	--	K01404	0	1620	aly:ARALYDRAFT_494774	leishmanolysin [EC:3.4.24.36]	GO:0007155//cell adhesion;GO:0006508//proteolysis	GO:0004222//metalloendopeptidase activity	GO:0005886//plasma membrane
CL1074.Contig6_All	1305	82	2.0991	167	4.0572	47	1.2332	gi|567202965|ref|XP_006408112.1|	630.2	0	hypothetical protein EUTSA_v10021106mg [Eutrema salsugineum] >gi|557109258|gb|ESQ49565.1| hypothetical protein EUTSA_v10021106mg [Eutrema salsugineum]	gi|145338131|ref|NM_111382.4|	957	0	Arabidopsis thaliana S-adenosylmethionine-dependent methyltransferase domain-containing protein mRNA, complete cds	--	--	--	--	--	--	--	--	--	--	--	--	--	--	GO:0032259//methylation	GO:0008168//methyltransferase activity	-
CL1074.Contig7_All	530	0	0	0	0	0	0	gi|567202965|ref|XP_006408112.1|	268.1	6e-89	hypothetical protein EUTSA_v10021106mg [Eutrema salsugineum] >gi|557109258|gb|ESQ49565.1| hypothetical protein EUTSA_v10021106mg [Eutrema salsugineum]	gi|145338131|ref|NM_111382.4|	422	1e-115	Arabidopsis thaliana S-adenosylmethionine-dependent methyltransferase domain-containing protein mRNA, complete cds	--	--	--	--	--	--	--	--	--	--	--	--	--	--	-	GO:0016740//transferase activity	-
CL1075.Contig1_All	677	403	19.8857	81	3.7933	26	1.3151	gi|297843316|ref|XP_002889539.1|	272.7	2e-92	hypothetical protein ARALYDRAFT_470516 [Arabidopsis lyrata subsp. lyrata] >gi|297335381|gb|EFH65798.1| hypothetical protein ARALYDRAFT_470516 [Arabidopsis lyrata subsp. lyrata]	gi|77817885|gb|DQ245204.1|	771	0	Zea mays clone 13764 mRNA sequence	--	--	--	--	--	--	--	--	--	--	--	--	--	--	-	-	GO:0005634//nucleus
CL1075.Contig2_All	587	163	9.2763	45	2.4305	30	1.75	gi|297843316|ref|XP_002889539.1|	295.8	6e-102	hypothetical protein ARALYDRAFT_470516 [Arabidopsis lyrata subsp. lyrata] >gi|297335381|gb|EFH65798.1| hypothetical protein ARALYDRAFT_470516 [Arabidopsis lyrata subsp. lyrata]	gi|77817885|gb|DQ245204.1|	470	1e-130	Zea mays clone 13764 mRNA sequence	--	--	--	--	--	--	--	--	--	--	--	--	--	--	-	-	GO:0005634//nucleus
CL1076.Contig1_All	1199	87	2.424	73	1.9303	16	0.4569	gi|430218299|gb|AGA37221.1|	560.8	0	mitogen-activated protein kinase kinase kinase ZIK8.1 [Brassica napus]	gi|430218298|gb|KC190102.1|	999	0	Brassica napus mitogen-activated protein kinase kinase kinase ZIK8.1 (ZIK8.1) mRNA, complete cds	sp|Q6ICW6|WNK11_ARATH	528	0	Probable serine/threonine-protein kinase WNK11 OS=Arabidopsis thaliana GN=WNK11 PE=2 SV=1	ECU01g0630	97.4	2e-21	COG0515	Serine/threonine protein kinase	K08867	1e-125	375	gmx:100301899	WNK lysine deficient protein kinase [EC:2.7.11.1]	GO:0000186//activation of MAPKK activity;GO:0010260//organ senescence	GO:0005524//ATP binding;GO:0004709//MAP kinase kinase kinase activity	GO:0005634//nucleus
CL1076.Contig2_All	1045	4	0.1279	2	0.0607	0	0	gi|430218299|gb|AGA37221.1|	560.8	0	mitogen-activated protein kinase kinase kinase ZIK8.1 [Brassica napus]	gi|430218298|gb|KC190102.1|	999	0	Brassica napus mitogen-activated protein kinase kinase kinase ZIK8.1 (ZIK8.1) mRNA, complete cds	sp|Q6ICW6|WNK11_ARATH	528	0	Probable serine/threonine-protein kinase WNK11 OS=Arabidopsis thaliana GN=WNK11 PE=2 SV=1	ECU01g0630	97.4	9e-22	COG0515	Serine/threonine protein kinase	K08867	5e-126	374	gmx:100301899	WNK lysine deficient protein kinase [EC:2.7.11.1]	GO:0000186//activation of MAPKK activity;GO:0010260//organ senescence	GO:0005524//ATP binding;GO:0004709//MAP kinase kinase kinase activity	GO:0005634//nucleus
CL1076.Contig3_All	239	6	0.8386	14	1.8572	1	0.1433	gi|567178906|ref|XP_006401441.1|	156.4	3e-47	hypothetical protein EUTSA_v10014189mg [Eutrema salsugineum] >gi|557102531|gb|ESQ42894.1| hypothetical protein EUTSA_v10014189mg [Eutrema salsugineum]	gi|430218298|gb|KC190102.1|	299	8e-79	Brassica napus mitogen-activated protein kinase kinase kinase ZIK8.1 (ZIK8.1) mRNA, complete cds	sp|Q6ICW6|WNK11_ARATH	154	3e-48	Probable serine/threonine-protein kinase WNK11 OS=Arabidopsis thaliana GN=WNK11 PE=2 SV=1	ECU01g0630	58.5	3e-11	COG0515	Serine/threonine protein kinase	K08867	6e-32	115	smo:SELMODRAFT_136322	WNK lysine deficient protein kinase [EC:2.7.11.1]	GO:0000186//activation of MAPKK activity;GO:0010260//organ senescence	GO:0005524//ATP binding;GO:0004709//MAP kinase kinase kinase activity	GO:0005634//nucleus
CL1077.Contig1_All	2413	0	0	0	0	0	0	gi|567195890|ref|XP_006406129.1|	1075.1	0	hypothetical protein EUTSA_v10020174mg [Eutrema salsugineum] >gi|557107275|gb|ESQ47582.1| hypothetical protein EUTSA_v10020174mg [Eutrema salsugineum]	gi|7767424|gb|AF204059.1|AF204059	821	0	Arabidopsis thaliana CXC domain protein TSO1 (TSO1) mRNA, complete cds	sp|Q9LUI3|TSO1_ARATH	1009	0	CRC domain-containing protein TSO1 OS=Arabidopsis thaliana GN=TSO1 PE=1 SV=1	--	--	--	--	--	--	--	--	--	--	GO:0010103//stomatal complex morphogenesis;GO:0043247//telomere maintenance in response to DNA damage;GO:0009934//regulation of meristem structural organization;GO:0006346//methylation-dependent chromatin silencing;GO:0031048//chromatin silencing by small RNA;GO:0042127//regulation of cell proliferation;GO:0010332//response to gamma radiation;GO:0006261//DNA-dependent DNA replication;GO:0000911//…	GO:0003700//sequence-specific DNA binding transcription factor activity	GO:0005634//nucleus
CL1077.Contig2_All	2158	97	1.5016	99	1.4545	34	0.5395	gi|567195890|ref|XP_006406129.1|	835.1	0	hypothetical protein EUTSA_v10020174mg [Eutrema salsugineum] >gi|557107275|gb|ESQ47582.1| hypothetical protein EUTSA_v10020174mg [Eutrema salsugineum]	gi|334186532|ref|NM_117562.6|	660	0	Arabidopsis thaliana TESMIN/TSO1-like CXC 2 mRNA, complete cds	sp|Q9LUI3|TSO1_ARATH	773	0	CRC domain-containing protein TSO1 OS=Arabidopsis thaliana GN=TSO1 PE=1 SV=1	--	--	--	--	--	--	--	--	--	--	GO:0010103//stomatal complex morphogenesis;GO:0043247//telomere maintenance in response to DNA damage;GO:0009934//regulation of meristem structural organization;GO:0006346//methylation-dependent chromatin silencing;GO:0031048//chromatin silencing by small RNA;GO:0042127//regulation of cell proliferation;GO:0010332//response to gamma radiation;GO:0006261//DNA-dependent DNA replication;GO:0000911//…	GO:0003700//sequence-specific DNA binding transcription factor activity	GO:0005634//nucleus
CL1077.Contig3_All	2242	372	5.5428	257	3.6343	78	1.1913	gi|567195890|ref|XP_006406129.1|	900.2	0	hypothetical protein EUTSA_v10020174mg [Eutrema salsugineum] >gi|557107275|gb|ESQ47582.1| hypothetical protein EUTSA_v10020174mg [Eutrema salsugineum]	gi|42464579|emb|BX823051.1|	537	1e-149	Arabidopsis thaliana Full-length cDNA Complete sequence from clone GSLTFB84ZD09 of Flowers and buds of strain col-0 of Arabidopsis thaliana (thale cress)	sp|Q9LUI3|TSO1_ARATH	818	0	CRC domain-containing protein TSO1 OS=Arabidopsis thaliana GN=TSO1 PE=1 SV=1	--	--	--	--	--	--	--	--	--	--	GO:0010103//stomatal complex morphogenesis;GO:0043247//telomere maintenance in response to DNA damage;GO:0009934//regulation of meristem structural organization;GO:0006346//methylation-dependent chromatin silencing;GO:0031048//chromatin silencing by small RNA;GO:0042127//regulation of cell proliferation;GO:0010332//response to gamma radiation;GO:0006261//DNA-dependent DNA replication;GO:0000911//…	GO:0003700//sequence-specific DNA binding transcription factor activity	GO:0005634//nucleus
CL1077.Contig4_All	2379	28	0.3932	16	0.2132	14	0.2015	gi|567195890|ref|XP_006406129.1|	1075.1	0	hypothetical protein EUTSA_v10020174mg [Eutrema salsugineum] >gi|557107275|gb|ESQ47582.1| hypothetical protein EUTSA_v10020174mg [Eutrema salsugineum]	gi|7767424|gb|AF204059.1|AF204059	821	0	Arabidopsis thaliana CXC domain protein TSO1 (TSO1) mRNA, complete cds	sp|Q9LUI3|TSO1_ARATH	1009	0	CRC domain-containing protein TSO1 OS=Arabidopsis thaliana GN=TSO1 PE=1 SV=1	--	--	--	--	--	--	--	--	--	--	GO:0010103//stomatal complex morphogenesis;GO:0043247//telomere maintenance in response to DNA damage;GO:0009934//regulation of meristem structural organization;GO:0006346//methylation-dependent chromatin silencing;GO:0031048//chromatin silencing by small RNA;GO:0042127//regulation of cell proliferation;GO:0010332//response to gamma radiation;GO:0006261//DNA-dependent DNA replication;GO:0000911//…	GO:0003700//sequence-specific DNA binding transcription factor activity	GO:0005634//nucleus
CL1077.Contig5_All	2246	0	0	0	0	0	0	gi|567195890|ref|XP_006406129.1|	909.4	0	hypothetical protein EUTSA_v10020174mg [Eutrema salsugineum] >gi|557107275|gb|ESQ47582.1| hypothetical protein EUTSA_v10020174mg [Eutrema salsugineum]	gi|42464579|emb|BX823051.1|	537	1e-149	Arabidopsis thaliana Full-length cDNA Complete sequence from clone GSLTFB84ZD09 of Flowers and buds of strain col-0 of Arabidopsis thaliana (thale cress)	sp|Q9LUI3|TSO1_ARATH	831	0	CRC domain-containing protein TSO1 OS=Arabidopsis thaliana GN=TSO1 PE=1 SV=1	--	--	--	--	--	--	--	--	--	--	GO:0010103//stomatal complex morphogenesis;GO:0043247//telomere maintenance in response to DNA damage;GO:0009934//regulation of meristem structural organization;GO:0006346//methylation-dependent chromatin silencing;GO:0031048//chromatin silencing by small RNA;GO:0042127//regulation of cell proliferation;GO:0010332//response to gamma radiation;GO:0006261//DNA-dependent DNA replication;GO:0000911//…	GO:0003700//sequence-specific DNA binding transcription factor activity	GO:0005634//nucleus
CL1077.Contig6_All	2253	0	0	0	0	0	0	gi|567195890|ref|XP_006406129.1|	1075.1	0	hypothetical protein EUTSA_v10020174mg [Eutrema salsugineum] >gi|557107275|gb|ESQ47582.1| hypothetical protein EUTSA_v10020174mg [Eutrema salsugineum]	gi|7767424|gb|AF204059.1|AF204059	821	0	Arabidopsis thaliana CXC domain protein TSO1 (TSO1) mRNA, complete cds	sp|Q9LUI3|TSO1_ARATH	1009	0	CRC domain-containing protein TSO1 OS=Arabidopsis thaliana GN=TSO1 PE=1 SV=1	--	--	--	--	--	--	--	--	--	--	GO:0010103//stomatal complex morphogenesis;GO:0043247//telomere maintenance in response to DNA damage;GO:0009934//regulation of meristem structural organization;GO:0006346//methylation-dependent chromatin silencing;GO:0031048//chromatin silencing by small RNA;GO:0042127//regulation of cell proliferation;GO:0010332//response to gamma radiation;GO:0006261//DNA-dependent DNA replication;GO:0000911//…	GO:0003700//sequence-specific DNA binding transcription factor activity	GO:0005634//nucleus
CL1077.Contig7_All	2368	114	1.6082	120	1.6066	58	0.8387	gi|567195890|ref|XP_006406129.1|	887.1	0	hypothetical protein EUTSA_v10020174mg [Eutrema salsugineum] >gi|557107275|gb|ESQ47582.1| hypothetical protein EUTSA_v10020174mg [Eutrema salsugineum]	gi|7767424|gb|AF204059.1|AF204059	807	0	Arabidopsis thaliana CXC domain protein TSO1 (TSO1) mRNA, complete cds	sp|Q9LUI3|TSO1_ARATH	830	0	CRC domain-containing protein TSO1 OS=Arabidopsis thaliana GN=TSO1 PE=1 SV=1	--	--	--	--	--	--	--	--	--	--	GO:0010103//stomatal complex morphogenesis;GO:0043247//telomere maintenance in response to DNA damage;GO:0009934//regulation of meristem structural organization;GO:0006346//methylation-dependent chromatin silencing;GO:0031048//chromatin silencing by small RNA;GO:0042127//regulation of cell proliferation;GO:0010332//response to gamma radiation;GO:0006261//DNA-dependent DNA replication;GO:0000911//…	GO:0003700//sequence-specific DNA binding transcription factor activity	GO:0005634//nucleus
CL1078.Contig1_All	593	230	12.9568	1	0.0535	0	0	gi|565464268|ref|XP_006290133.1|	216.9	1e-71	hypothetical protein CARUB_v10003797mg [Capsella rubella] >gi|482558839|gb|EOA23031.1| hypothetical protein CARUB_v10003797mg [Capsella rubella]	gi|2370458|emb|Y11987.1|	575	1e-161	S.alba FPF1 mRNA	sp|O23624|FPF1_ARATH	210	7e-71	Flowering-promoting factor 1 OS=Arabidopsis thaliana GN=FPF1 PE=2 SV=1	--	--	--	--	--	K14416	7e-50	173	aly:ARALYDRAFT_325603	elongation factor 1 alpha-like protein	GO:0009911//positive regulation of flower development;GO:0006184//GTP catabolic process;GO:0010228//vegetative to reproductive phase transition of meristem;GO:0009739//response to gibberellin stimulus	GO:0008270//zinc ion binding;GO:0005525//GTP binding;GO:0003924//GTPase activity	GO:0005634//nucleus
CL1078.Contig2_All	598	1703	95.1345	4	0.2121	0	0	gi|75098154|sp|O24340.1|FPF1_SINAL	227.3	1e-75	RecName: Full=Flowering-promoting factor 1; Short=SaFPF1 >gi|2370459|emb|CAA72716.1| FPF1 protein [Sinapis alba]	gi|2370458|emb|Y11987.1|	1055	0	S.alba FPF1 mRNA	sp|O24340|FPF1_SINAL	227	2e-77	Flowering-promoting factor 1 OS=Sinapis alba GN=FPF1 PE=2 SV=1	--	--	--	--	--	K14416	4e-50	174	aly:ARALYDRAFT_325603	elongation factor 1 alpha-like protein	GO:0009739//response to gibberellin stimulus;GO:0009911//positive regulation of flower development;GO:0010228//vegetative to reproductive phase transition of meristem	-	GO:0005634//nucleus
CL1079.Contig1_All	2253	6	0.089	8	0.1126	8	0.1216	gi|567140418|ref|XP_006395061.1|	1197.2	0	hypothetical protein EUTSA_v10003846mg [Eutrema salsugineum] >gi|557091700|gb|ESQ32347.1| hypothetical protein EUTSA_v10003846mg [Eutrema salsugineum]	gi|145359049|ref|NM_124323.3|	2855	0	Arabidopsis thaliana ATP citrate lyase subunit B 2 mRNA, complete cds	sp|Q9FGX1|ACLB2_ARATH	1196	0	ATP-citrate synthase beta chain protein 2 OS=Arabidopsis thaliana GN=ACLB-2 PE=1 SV=1	SPBC1703.07_1	401	1e-133	COG0074	Succinyl-CoA synthetase, alpha subunit	K01648	0	1197	aly:ARALYDRAFT_917924	ATP citrate (pro-S)-lyase [EC:2.3.3.8]	GO:0016132//brassinosteroid biosynthetic process;GO:0006085//acetyl-CoA biosynthetic process;GO:0016926//protein desumoylation;GO:0010228//vegetative to reproductive phase transition of meristem;GO:0044262//cellular carbohydrate metabolic process;GO:0050665//hydrogen peroxide biosynthetic process;GO:0016126//sterol biosynthetic process	GO:0016829//lyase activity;GO:0046872//metal ion binding;GO:0003878//ATP citrate synthase activity;GO:0004775//succinate-CoA ligase (ADP-forming) activity;GO:0005524//ATP binding;GO:0048037//cofactor binding	GO:0005829//cytosol;GO:0009346//citrate lyase complex;GO:0005886//plasma membrane
CL1079.Contig2_All	2194	234	3.5629	326	4.7108	193	3.0122	gi|567140418|ref|XP_006395061.1|	1197.2	0	hypothetical protein EUTSA_v10003846mg [Eutrema salsugineum] >gi|557091700|gb|ESQ32347.1| hypothetical protein EUTSA_v10003846mg [Eutrema salsugineum]	gi|145359049|ref|NM_124323.3|	2799	0	Arabidopsis thaliana ATP citrate lyase subunit B 2 mRNA, complete cds	sp|Q9FGX1|ACLB2_ARATH	1196	0	ATP-citrate synthase beta chain protein 2 OS=Arabidopsis thaliana GN=ACLB-2 PE=1 SV=1	SPBC1703.07_1	401	8e-134	COG0074	Succinyl-CoA synthetase, alpha subunit	K01648	0	1197	aly:ARALYDRAFT_917924	ATP citrate (pro-S)-lyase [EC:2.3.3.8]	GO:0016132//brassinosteroid biosynthetic process;GO:0006085//acetyl-CoA biosynthetic process;GO:0016926//protein desumoylation;GO:0010228//vegetative to reproductive phase transition of meristem;GO:0044262//cellular carbohydrate metabolic process;GO:0050665//hydrogen peroxide biosynthetic process;GO:0016126//sterol biosynthetic process	GO:0016829//lyase activity;GO:0046872//metal ion binding;GO:0003878//ATP citrate synthase activity;GO:0004775//succinate-CoA ligase (ADP-forming) activity;GO:0005524//ATP binding;GO:0048037//cofactor binding	GO:0005829//cytosol;GO:0009346//citrate lyase complex;GO:0005886//plasma membrane
CL1079.Contig3_All	2195	638	9.7098	678	9.7929	687	10.7172	gi|567140418|ref|XP_006395061.1|	1198.3	0	hypothetical protein EUTSA_v10003846mg [Eutrema salsugineum] >gi|557091700|gb|ESQ32347.1| hypothetical protein EUTSA_v10003846mg [Eutrema salsugineum]	gi|145359049|ref|NM_124323.3|	2847	0	Arabidopsis thaliana ATP citrate lyase subunit B 2 mRNA, complete cds	sp|Q9FGX1|ACLB2_ARATH	1197	0	ATP-citrate synthase beta chain protein 2 OS=Arabidopsis thaliana GN=ACLB-2 PE=1 SV=1	SPBC1703.07_1	402	5e-134	COG0074	Succinyl-CoA synthetase, alpha subunit	K01648	0	1198	aly:ARALYDRAFT_917924	ATP citrate (pro-S)-lyase [EC:2.3.3.8]	GO:0016132//brassinosteroid biosynthetic process;GO:0006085//acetyl-CoA biosynthetic process;GO:0016926//protein desumoylation;GO:0010228//vegetative to reproductive phase transition of meristem;GO:0044262//cellular carbohydrate metabolic process;GO:0050665//hydrogen peroxide biosynthetic process;GO:0016126//sterol biosynthetic process	GO:0016829//lyase activity;GO:0046872//metal ion binding;GO:0003878//ATP citrate synthase activity;GO:0004775//succinate-CoA ligase (ADP-forming) activity;GO:0005524//ATP binding;GO:0048037//cofactor binding	GO:0005829//cytosol;GO:0009346//citrate lyase complex;GO:0005886//plasma membrane
CL108.Contig1_All	370	63	5.6881	60	5.1412	19	1.7584	gi|567124046|ref|XP_006391072.1|	218	2e-68	hypothetical protein EUTSA_v10018444mg [Eutrema salsugineum] >gi|557087506|gb|ESQ28358.1| hypothetical protein EUTSA_v10018444mg [Eutrema salsugineum]	gi|227204400|dbj|AK318937.1|	470	1e-130	Arabidopsis thaliana AT1G68920 mRNA, complete cds, clone: RAFL22-22-I01	sp|Q9CAA9|BH049_ARATH	215	2e-69	Transcription factor bHLH49 OS=Arabidopsis thaliana GN=BHLH49 PE=2 SV=1	--	--	--	--	--	--	--	--	--	--	GO:0009911//positive regulation of flower development;GO:0006355//regulation of transcription, DNA-dependent	GO:0046983//protein dimerization activity;GO:0003700//sequence-specific DNA binding transcription factor activity	GO:0005634//nucleus
CL108.Contig2_All	1947	637	10.9294	429	6.9857	259	4.555	gi|565489057|ref|XP_006302168.1|	802	0	hypothetical protein CARUB_v10020178mg [Capsella rubella] >gi|482570878|gb|EOA35066.1| hypothetical protein CARUB_v10020178mg [Capsella rubella]	gi|79320925|ref|NM_001036178.1|	1193	0	Arabidopsis thaliana transcription factor bHLH49 mRNA, complete cds	sp|Q9CAA9|BH049_ARATH	756	0	Transcription factor bHLH49 OS=Arabidopsis thaliana GN=BHLH49 PE=2 SV=1	--	--	--	--	--	K12126	4e-13	73.6	aly:ARALYDRAFT_471048	phytochrome-interacting factor 3	GO:0006355//regulation of transcription, DNA-dependent	GO:0003700//sequence-specific DNA binding transcription factor activity;GO:0046983//protein dimerization activity	GO:0005634//nucleus
CL108.Contig3_All	1687	297	5.8812	157	2.9505	90	1.8268	gi|567124046|ref|XP_006391072.1|	759.2	0	hypothetical protein EUTSA_v10018444mg [Eutrema salsugineum] >gi|557087506|gb|ESQ28358.1| hypothetical protein EUTSA_v10018444mg [Eutrema salsugineum]	gi|297838662|ref|XM_002887167.1|	902	0	Arabidopsis lyrata subsp. lyrata basic helix-loop-helix family protein, mRNA	sp|Q9CAA9|BH049_ARATH	726	0	Transcription factor bHLH49 OS=Arabidopsis thaliana GN=BHLH49 PE=2 SV=1	--	--	--	--	--	K12126	7e-13	72.4	aly:ARALYDRAFT_471048	phytochrome-interacting factor 3	GO:0009911//positive regulation of flower development;GO:0006355//regulation of transcription, DNA-dependent	GO:0046983//protein dimerization activity;GO:0003700//sequence-specific DNA binding transcription factor activity	GO:0005634//nucleus
CL1080.Contig1_All	463	22	1.5873	16	1.0956	3	0.2219	gi|567178246|ref|XP_006401245.1|	148.3	6e-42	hypothetical protein EUTSA_v10013779mg [Eutrema salsugineum] >gi|557102335|gb|ESQ42698.1| hypothetical protein EUTSA_v10013779mg [Eutrema salsugineum]	gi|297796594|ref|XM_002866136.1|	264	9e-68	Arabidopsis lyrata subsp. lyrata At5g57100, mRNA	--	--	--	--	--	--	--	--	--	--	--	--	--	--	-	-	GO:0016021//integral to membrane
CL1080.Contig2_All	2646	34	0.4293	12	0.1438	0	0	gi|567178246|ref|XP_006401245.1|	117.1	0	hypothetical protein EUTSA_v10013779mg [Eutrema salsugineum] >gi|557102335|gb|ESQ42698.1| hypothetical protein EUTSA_v10013779mg [Eutrema salsugineum]	gi|297824622|ref|XM_002880148.1|	888	0	Arabidopsis lyrata subsp. lyrata peroxisomal biogenesis factor 11 family protein, mRNA	sp|O80845|PX11D_ARATH	436	5e-148	Peroxisomal membrane protein 11D OS=Arabidopsis thaliana GN=PEX11D PE=1 SV=2	SPAC22E12.01	58.5	1e-08	COG0697	Permeases of the drug/metabolite transporter (DMT) superfamily	K15285	7e-26	111	rcu:RCOM_0034370	solute carrier family 35, member E3	GO:0044375//regulation of peroxisome size;GO:0016559//peroxisome fission	GO:0042802//identical protein binding	GO:0005779//integral to peroxisomal membrane;GO:0009507//chloroplast;GO:0005739//mitochondrion
CL1080.Contig3_All	1743	66	1.2649	77	1.4006	14	0.275	gi|567178246|ref|XP_006401245.1|	706.1	0	hypothetical protein EUTSA_v10013779mg [Eutrema salsugineum] >gi|557102335|gb|ESQ42698.1| hypothetical protein EUTSA_v10013779mg [Eutrema salsugineum]	gi|297796594|ref|XM_002866136.1|	1174	0	Arabidopsis lyrata subsp. lyrata At5g57100, mRNA	sp|Q8RXL8|Y1689_ARATH	151	1e-40	Uncharacterized membrane protein At1g06890 OS=Arabidopsis thaliana GN=At1g06890 PE=1 SV=1	SPAC22E12.01	63.9	1e-10	COG0697	Permeases of the drug/metabolite transporter (DMT) superfamily	K15285	8e-44	160	zma:100274338	solute carrier family 35, member E3	-	-	GO:0016021//integral to membrane
CL1080.Contig4_All	2491	16	0.2146	34	0.4327	14	0.1924	gi|567178246|ref|XP_006401245.1|	706.1	0	hypothetical protein EUTSA_v10013779mg [Eutrema salsugineum] >gi|557102335|gb|ESQ42698.1| hypothetical protein EUTSA_v10013779mg [Eutrema salsugineum]	gi|297796594|ref|XM_002866136.1|	1174	0	Arabidopsis lyrata subsp. lyrata At5g57100, mRNA	sp|O80845|PX11D_ARATH	436	1e-148	Peroxisomal membrane protein 11D OS=Arabidopsis thaliana GN=PEX11D PE=1 SV=2	SPAC22E12.01	63.9	2e-10	COG0697	Permeases of the drug/metabolite transporter (DMT) superfamily	K15285	7e-43	160	zma:100274338	solute carrier family 35, member E3	-	-	GO:0016021//integral to membrane
CL1080.Contig5_All	2573	34	0.4414	36	0.4436	54	0.7186	gi|567178246|ref|XP_006401245.1|	260.8	0	hypothetical protein EUTSA_v10013779mg [Eutrema salsugineum] >gi|557102335|gb|ESQ42698.1| hypothetical protein EUTSA_v10013779mg [Eutrema salsugineum]	gi|297824622|ref|XM_002880148.1|	896	0	Arabidopsis lyrata subsp. lyrata peroxisomal biogenesis factor 11 family protein, mRNA	sp|O80845|PX11D_ARATH	436	1e-148	Peroxisomal membrane protein 11D OS=Arabidopsis thaliana GN=PEX11D PE=1 SV=2	SPAC22E12.01	58.5	1e-08	COG0697	Permeases of the drug/metabolite transporter (DMT) superfamily	K15285	7e-30	97.4	smo:SELMODRAFT_268189	solute carrier family 35, member E3	GO:0044375//regulation of peroxisome size;GO:0016559//peroxisome fission	GO:0042802//identical protein binding	GO:0005779//integral to peroxisomal membrane;GO:0009507//chloroplast;GO:0005739//mitochondrion
CL1080.Contig6_All	2561	6	0.0783	4	0.0495	0	0	gi|567178246|ref|XP_006401245.1|	148.3	0	hypothetical protein EUTSA_v10013779mg [Eutrema salsugineum] >gi|557102335|gb|ESQ42698.1| hypothetical protein EUTSA_v10013779mg [Eutrema salsugineum]	gi|297796594|ref|XM_002866136.1|	959	0	Arabidopsis lyrata subsp. lyrata At5g57100, mRNA	sp|O80845|PX11D_ARATH	436	2e-148	Peroxisomal membrane protein 11D OS=Arabidopsis thaliana GN=PEX11D PE=1 SV=2	SPAC22E12.01	63.9	2e-10	COG0697	Permeases of the drug/metabolite transporter (DMT) superfamily	K15285	5e-34	122	cme:CMS488C	solute carrier family 35, member E3	GO:0044375//regulation of peroxisome size;GO:0016559//peroxisome fission	GO:0042802//identical protein binding	GO:0005779//integral to peroxisomal membrane;GO:0009507//chloroplast;GO:0005739//mitochondrion
CL1080.Contig7_All	1014	20	0.6589	25	0.7817	507	17.121	gi|297824623|ref|XP_002880194.1|	446.8	3e-158	peroxisomal biogenesis factor 11 family protein [Arabidopsis lyrata subsp. lyrata] >gi|297326033|gb|EFH56453.1| peroxisomal biogenesis factor 11 family protein [Arabidopsis lyrata subsp. lyrata]	gi|186508415|ref|NM_001036467.3|	904	0	Arabidopsis thaliana peroxisomal membrane protein 11D mRNA, complete cds	sp|O80845|PX11D_ARATH	442	2e-158	Peroxisomal membrane protein 11D OS=Arabidopsis thaliana GN=PEX11D PE=1 SV=2	--	--	--	--	--	--	--	--	--	--	GO:0044375//regulation of peroxisome size;GO:0007623//circadian rhythm;GO:0016559//peroxisome fission	GO:0042802//identical protein binding	GO:0009506//plasmodesma;GO:0005779//integral to peroxisomal membrane;GO:0009507//chloroplast;GO:0005739//mitochondrion
CL1081.Contig1_All	1697	1053	20.7287	25	0.4671	0	0	gi|567180587|ref|XP_006401923.1|	830.9	0	hypothetical protein EUTSA_v10013322mg [Eutrema salsugineum] >gi|557103013|gb|ESQ43376.1| hypothetical protein EUTSA_v10013322mg [Eutrema salsugineum]	gi|12484204|gb|AF336920.1|	995	0	Arabidopsis thaliana clone C00056 (e) aminotransferase (At5g51690) mRNA, complete cds	sp|Q8GYY0|1A112_ARATH	806	0	Probable aminotransferase ACS12 OS=Arabidopsis thaliana GN=ACS12 PE=2 SV=2	aq_1969	122	1e-29	COG0436	Aspartate/tyrosine/aromatic aminotransferase	K14270	0	812	aly:ARALYDRAFT_918199	aminotransferase	GO:0009693//ethylene biosynthetic process;GO:0006520//cellular amino acid metabolic process	GO:0008793//aromatic-amino-acid:2-oxoglutarate aminotransferase activity;GO:0030170//pyridoxal phosphate binding;GO:0004069//L-aspartate:2-oxoglutarate aminotransferase activity;GO:0016847//1-aminocyclopropane-1-carboxylate synthase activity	GO:0005737//cytoplasm
CL1081.Contig2_All	2811	11	0.1307	6	0.0677	3	0.0365	gi|567180587|ref|XP_006401923.1|	915.6	0	hypothetical protein EUTSA_v10013322mg [Eutrema salsugineum] >gi|557103013|gb|ESQ43376.1| hypothetical protein EUTSA_v10013322mg [Eutrema salsugineum]	gi|297795974|ref|XM_002865826.1|	1516	0	Arabidopsis lyrata subsp. lyrata 1-amino-cyclopropane-1-carboxylate synthase 12 (ACS12), mRNA	sp|Q8GYY0|1A112_ARATH	895	0	Probable aminotransferase ACS12 OS=Arabidopsis thaliana GN=ACS12 PE=2 SV=2	BS_yugH	118	4e-28	COG0436	Aspartate/tyrosine/aromatic aminotransferase	K14270	0	908	aly:ARALYDRAFT_918199	aminotransferase	GO:0009693//ethylene biosynthetic process;GO:0042218//1-aminocyclopropane-1-carboxylate biosynthetic process	GO:0008793//aromatic-amino-acid:2-oxoglutarate aminotransferase activity;GO:0030170//pyridoxal phosphate binding;GO:0004069//L-aspartate:2-oxoglutarate aminotransferase activity;GO:0016847//1-aminocyclopropane-1-carboxylate synthase activity	GO:0005737//cytoplasm
CL1081.Contig3_All	2852	2	0.0234	12	0.1334	4	0.048	gi|567180587|ref|XP_006401923.1|	915.2	0	hypothetical protein EUTSA_v10013322mg [Eutrema salsugineum] >gi|557103013|gb|ESQ43376.1| hypothetical protein EUTSA_v10013322mg [Eutrema salsugineum]	gi|297795974|ref|XM_002865826.1|	1491	0	Arabidopsis lyrata subsp. lyrata 1-amino-cyclopropane-1-carboxylate synthase 12 (ACS12), mRNA	sp|Q8GYY0|1A112_ARATH	895	0	Probable aminotransferase ACS12 OS=Arabidopsis thaliana GN=ACS12 PE=2 SV=2	BS_yugH	118	4e-28	COG0436	Aspartate/tyrosine/aromatic aminotransferase	K14270	0	906	aly:ARALYDRAFT_918199	aminotransferase	GO:0009693//ethylene biosynthetic process;GO:0042218//1-aminocyclopropane-1-carboxylate biosynthetic process	GO:0008793//aromatic-amino-acid:2-oxoglutarate aminotransferase activity;GO:0030170//pyridoxal phosphate binding;GO:0004069//L-aspartate:2-oxoglutarate aminotransferase activity;GO:0016847//1-aminocyclopropane-1-carboxylate synthase activity	GO:0005737//cytoplasm
CL1081.Contig4_All	2878	32	0.3714	24	0.2644	36	0.4283	gi|567180587|ref|XP_006401923.1|	918.3	0	hypothetical protein EUTSA_v10013322mg [Eutrema salsugineum] >gi|557103013|gb|ESQ43376.1| hypothetical protein EUTSA_v10013322mg [Eutrema salsugineum]	gi|297795974|ref|XM_002865826.1|	1516	0	Arabidopsis lyrata subsp. lyrata 1-amino-cyclopropane-1-carboxylate synthase 12 (ACS12), mRNA	sp|Q8GYY0|1A112_ARATH	898	0	Probable aminotransferase ACS12 OS=Arabidopsis thaliana GN=ACS12 PE=2 SV=2	BS_yugH	117	7e-28	COG0436	Aspartate/tyrosine/aromatic aminotransferase	K14270	0	911	aly:ARALYDRAFT_918199	aminotransferase	GO:0009693//ethylene biosynthetic process;GO:0042218//1-aminocyclopropane-1-carboxylate biosynthetic process	GO:0008793//aromatic-amino-acid:2-oxoglutarate aminotransferase activity;GO:0030170//pyridoxal phosphate binding;GO:0004069//L-aspartate:2-oxoglutarate aminotransferase activity;GO:0016847//1-aminocyclopropane-1-carboxylate synthase activity	GO:0005737//cytoplasm
CL1081.Contig5_All	2764	36	0.4351	12	0.1376	68	0.8424	gi|567180587|ref|XP_006401923.1|	917.9	0	hypothetical protein EUTSA_v10013322mg [Eutrema salsugineum] >gi|557103013|gb|ESQ43376.1| hypothetical protein EUTSA_v10013322mg [Eutrema salsugineum]	gi|297795974|ref|XM_002865826.1|	1499	0	Arabidopsis lyrata subsp. lyrata 1-amino-cyclopropane-1-carboxylate synthase 12 (ACS12), mRNA	sp|Q8GYY0|1A112_ARATH	898	0	Probable aminotransferase ACS12 OS=Arabidopsis thaliana GN=ACS12 PE=2 SV=2	BS_yugH	117	7e-28	COG0436	Aspartate/tyrosine/aromatic aminotransferase	K14270	0	909	aly:ARALYDRAFT_918199	aminotransferase	GO:0009693//ethylene biosynthetic process;GO:0042218//1-aminocyclopropane-1-carboxylate biosynthetic process	GO:0008793//aromatic-amino-acid:2-oxoglutarate aminotransferase activity;GO:0030170//pyridoxal phosphate binding;GO:0004069//L-aspartate:2-oxoglutarate aminotransferase activity;GO:0016847//1-aminocyclopropane-1-carboxylate synthase activity	GO:0005737//cytoplasm
CL1081.Contig6_All	3032	100	1.1018	34	0.3555	56	0.6324	gi|567180587|ref|XP_006401923.1|	918.7	0	hypothetical protein EUTSA_v10013322mg [Eutrema salsugineum] >gi|557103013|gb|ESQ43376.1| hypothetical protein EUTSA_v10013322mg [Eutrema salsugineum]	gi|297795974|ref|XM_002865826.1|	1507	0	Arabidopsis lyrata subsp. lyrata 1-amino-cyclopropane-1-carboxylate synthase 12 (ACS12), mRNA	sp|Q8GYY0|1A112_ARATH	899	0	Probable aminotransferase ACS12 OS=Arabidopsis thaliana GN=ACS12 PE=2 SV=2	BS_yugH	118	4e-28	COG0436	Aspartate/tyrosine/aromatic aminotransferase	K14270	0	910	aly:ARALYDRAFT_918199	aminotransferase	GO:0009693//ethylene biosynthetic process;GO:0042218//1-aminocyclopropane-1-carboxylate biosynthetic process	GO:0008793//aromatic-amino-acid:2-oxoglutarate aminotransferase activity;GO:0030170//pyridoxal phosphate binding;GO:0004069//L-aspartate:2-oxoglutarate aminotransferase activity;GO:0016847//1-aminocyclopropane-1-carboxylate synthase activity	GO:0005737//cytoplasm
CL1081.Contig7_All	1738	292	5.6125	0	0	0	0	gi|567180587|ref|XP_006401923.1|	881.3	0	hypothetical protein EUTSA_v10013322mg [Eutrema salsugineum] >gi|557103013|gb|ESQ43376.1| hypothetical protein EUTSA_v10013322mg [Eutrema salsugineum]	gi|23306425|gb|BT000463.1|	1160	0	Arabidopsis thaliana ACC synthase; 1-aminocyclopropane-1-carboxylate synthase (At5g51690) mRNA, complete cds	sp|Q8GYY0|1A112_ARATH	856	0	Probable aminotransferase ACS12 OS=Arabidopsis thaliana GN=ACS12 PE=2 SV=2	aq_1969	123	5e-30	COG0436	Aspartate/tyrosine/aromatic aminotransferase	K14270	0	869	aly:ARALYDRAFT_918199	aminotransferase	GO:0009693//ethylene biosynthetic process;GO:0042218//1-aminocyclopropane-1-carboxylate biosynthetic process	GO:0008793//aromatic-amino-acid:2-oxoglutarate aminotransferase activity;GO:0030170//pyridoxal phosphate binding;GO:0004069//L-aspartate:2-oxoglutarate aminotransferase activity;GO:0016847//1-aminocyclopropane-1-carboxylate synthase activity	GO:0005737//cytoplasm
CL1081.Contig8_All	1755	0	0	0	0	0	0	gi|567180587|ref|XP_006401923.1|	880.9	0	hypothetical protein EUTSA_v10013322mg [Eutrema salsugineum] >gi|557103013|gb|ESQ43376.1| hypothetical protein EUTSA_v10013322mg [Eutrema salsugineum]	gi|23306425|gb|BT000463.1|	1176	0	Arabidopsis thaliana ACC synthase; 1-aminocyclopropane-1-carboxylate synthase (At5g51690) mRNA, complete cds	sp|Q8GYY0|1A112_ARATH	856	0	Probable aminotransferase ACS12 OS=Arabidopsis thaliana GN=ACS12 PE=2 SV=2	aq_1969	122	9e-30	COG0436	Aspartate/tyrosine/aromatic aminotransferase	K14270	0	868	aly:ARALYDRAFT_918199	aminotransferase	GO:0009693//ethylene biosynthetic process;GO:0042218//1-aminocyclopropane-1-carboxylate biosynthetic process	GO:0008793//aromatic-amino-acid:2-oxoglutarate aminotransferase activity;GO:0030170//pyridoxal phosphate binding;GO:0004069//L-aspartate:2-oxoglutarate aminotransferase activity;GO:0016847//1-aminocyclopropane-1-carboxylate synthase activity	GO:0005737//cytoplasm
CL1082.Contig1_All	597	95	5.3159	64	3.3988	1	0.0574	gi|297806319|ref|XP_002871043.1|	57.8	1e-09	hypothetical protein ARALYDRAFT_487132 [Arabidopsis lyrata subsp. lyrata] >gi|297316880|gb|EFH47302.1| hypothetical protein ARALYDRAFT_487132 [Arabidopsis lyrata subsp. lyrata]	gi|199580155|gb|AC232522.1|	335	4e-89	Brassica rapa subsp. pekinensis clone KBrB073I16, complete sequence	--	--	--	--	--	--	--	--	--	--	--	--	--	--	GO:0019375//galactolipid biosynthetic process;GO:0045892//negative regulation of transcription, DNA-dependent;GO:0016036//cellular response to phosphate starvation	-	GO:0005739//mitochondrion
CL1082.Contig2_All	601	43	2.3901	39	2.0574	4	0.2279	gi|297806319|ref|XP_002871043.1|	48.5	9e-17	hypothetical protein ARALYDRAFT_487132 [Arabidopsis lyrata subsp. lyrata] >gi|297316880|gb|EFH47302.1| hypothetical protein ARALYDRAFT_487132 [Arabidopsis lyrata subsp. lyrata]	gi|332002898|gb|CP002688.1|	228	6e-57	Arabidopsis thaliana chromosome 5, complete sequence	--	--	--	--	--	--	--	--	--	--	--	--	--	--	GO:0019375//galactolipid biosynthetic process;GO:0045892//negative regulation of transcription, DNA-dependent;GO:0016036//cellular response to phosphate starvation	-	GO:0005739//mitochondrion
CL1082.Contig3_All	644	48	2.4899	10	0.4923	4	0.2127	gi|297806319|ref|XP_002871043.1|	48.5	1e-16	hypothetical protein ARALYDRAFT_487132 [Arabidopsis lyrata subsp. lyrata] >gi|297316880|gb|EFH47302.1| hypothetical protein ARALYDRAFT_487132 [Arabidopsis lyrata subsp. lyrata]	gi|332002898|gb|CP002688.1|	228	7e-57	Arabidopsis thaliana chromosome 5, complete sequence	--	--	--	--	--	--	--	--	--	--	--	--	--	--	GO:0019375//galactolipid biosynthetic process;GO:0045892//negative regulation of transcription, DNA-dependent;GO:0016036//cellular response to phosphate starvation	-	GO:0005739//mitochondrion
CL1083.Contig1_All	1818	15656	287.681	2639	46.0218	577	10.8678	gi|567215284|ref|XP_006411357.1|	659.8	0	hypothetical protein EUTSA_v10016763mg [Eutrema salsugineum] >gi|557112526|gb|ESQ52810.1| hypothetical protein EUTSA_v10016763mg [Eutrema salsugineum]	gi|145360851|ref|NM_129653.4|	1100	0	Arabidopsis thaliana nodulin MtN21-like transporter family protein mRNA, complete cds	sp|F4IJ08|WTR15_ARATH	626	0	WAT1-related protein At2g40900 OS=Arabidopsis thaliana GN=At2g40900 PE=2 SV=1	SP1268	57.8	2e-08	COG0697	Permeases of the drug/metabolite transporter (DMT) superfamily	--	--	--	--	--	-	-	GO:0016020//membrane;GO:0005576//extracellular region
CL1083.Contig2_All	918	196	7.1324	204	7.0454	72	2.6856	gi|567184392|ref|XP_006402969.1|	465.3	7e-164	hypothetical protein EUTSA_v10006038mg [Eutrema salsugineum] >gi|557104068|gb|ESQ44422.1| hypothetical protein EUTSA_v10006038mg [Eutrema salsugineum]	gi|145339582|ref|NM_115521.3|	823	0	Arabidopsis thaliana nodulin MtN21-like transporter family protein mRNA, complete cds	sp|Q9LXX8|WTR27_ARATH	452	1e-160	WAT1-related protein At3g56620 OS=Arabidopsis thaliana GN=At3g56620 PE=2 SV=1	lin0496	53.5	2e-07	COG0697	Permeases of the drug/metabolite transporter (DMT) superfamily	--	--	--	--	--	-	-	GO:0016020//membrane;GO:0005576//extracellular region
CL1084.Contig1_All	1037	270	8.6978	253	7.735	80	2.6416	--	--	--	--	--	--	--	--	--	--	--	--	--	--	--	--	--	--	--	--	--	--	-	-	-
CL1084.Contig2_All	871	58	2.2245	44	1.6016	12	0.4718	--	--	--	--	--	--	--	--	--	--	--	--	--	--	--	--	--	--	--	--	--	--	-	-	-
CL1084.Contig3_All	716	23	1.0731	38	1.6826	12	0.5739	--	--	--	--	--	--	--	--	--	--	--	--	--	--	--	--	--	--	--	--	--	--	-	-	-
CL1084.Contig4_All	845	6	0.2372	0	0	6	0.2431	--	--	--	--	--	--	--	--	--	--	--	--	--	--	--	--	--	--	--	--	--	--	-	-	-
CL1085.Contig1_All	782	103	4.4	54	2.1893	35	1.5326	gi|567214178|ref|XP_006411072.1|	313.5	5e-104	hypothetical protein EUTSA_v10016682mg [Eutrema salsugineum] >gi|557112241|gb|ESQ52525.1| hypothetical protein EUTSA_v10016682mg [Eutrema salsugineum]	gi|312283192|dbj|AK353376.1|	293	2e-76	Thellungiella halophila mRNA, complete cds, clone: RTFL01-35-J07	sp|Q9FHK9|MD26B_ARATH	47	6e-06	Probable mediator of RNA polymerase II transcription subunit 26b OS=Arabidopsis thaliana GN=MED26B PE=2 SV=1	--	--	--	--	--	K03145	7e-96	287	aly:ARALYDRAFT_482865	transcription elongation factor S-II	GO:0000394//RNA splicing, via endonucleolytic cleavage and ligation;GO:0009880//embryonic pattern specification;GO:0050826//response to freezing;GO:0009910//negative regulation of flower development;GO:0034243//regulation of transcription elongation from RNA polymerase II promoter;GO:0048825//cotyledon development;GO:0051301//cell division;GO:0009640//photomorphogenesis;GO:0010564//regulation of …	GO:0003677//DNA binding;GO:0003700//sequence-specific DNA binding transcription factor activity	GO:0005829//cytosol;GO:0005634//nucleus
CL1085.Contig2_All	802	225	9.372	126	4.981	107	4.5684	gi|567214178|ref|XP_006411072.1|	324.3	3e-108	hypothetical protein EUTSA_v10016682mg [Eutrema salsugineum] >gi|557112241|gb|ESQ52525.1| hypothetical protein EUTSA_v10016682mg [Eutrema salsugineum]	gi|312283192|dbj|AK353376.1|	357	1e-95	Thellungiella halophila mRNA, complete cds, clone: RTFL01-35-J07	sp|Q9FHK9|MD26B_ARATH	52.4	1e-07	Probable mediator of RNA polymerase II transcription subunit 26b OS=Arabidopsis thaliana GN=MED26B PE=2 SV=1	--	--	--	--	--	K03145	1e-97	291	aly:ARALYDRAFT_482865	transcription elongation factor S-II	GO:0000394//RNA splicing, via endonucleolytic cleavage and ligation;GO:0009880//embryonic pattern specification;GO:0050826//response to freezing;GO:0009910//negative regulation of flower development;GO:0034243//regulation of transcription elongation from RNA polymerase II promoter;GO:0048825//cotyledon development;GO:0051301//cell division;GO:0009640//photomorphogenesis;GO:0010564//regulation of …	GO:0008270//zinc ion binding;GO:0003677//DNA binding;GO:0003700//sequence-specific DNA binding transcription factor activity	GO:0005829//cytosol;GO:0005634//nucleus
CL1085.Contig3_All	1550	823	17.7375	462	9.4499	539	11.9074	gi|567214178|ref|XP_006411072.1|	633.3	0	hypothetical protein EUTSA_v10016682mg [Eutrema salsugineum] >gi|557112241|gb|ESQ52525.1| hypothetical protein EUTSA_v10016682mg [Eutrema salsugineum]	gi|312283192|dbj|AK353376.1|	839	0	Thellungiella halophila mRNA, complete cds, clone: RTFL01-35-J07	--	--	--	--	SPAC20H4.03c	132	3e-34	COG1594	DNA-directed RNA polymerase, subunit M/Transcription elongation factor TFIIS	K03145	0	604	aly:ARALYDRAFT_482865	transcription elongation factor S-II	GO:0000394//RNA splicing, via endonucleolytic cleavage and ligation;GO:0009880//embryonic pattern specification;GO:0050826//response to freezing;GO:0009910//negative regulation of flower development;GO:0034243//regulation of transcription elongation from RNA polymerase II promoter;GO:0048825//cotyledon development;GO:0051301//cell division;GO:0009640//photomorphogenesis;GO:0010564//regulation of …	GO:0008270//zinc ion binding;GO:0003677//DNA binding;GO:0003700//sequence-specific DNA binding transcription factor activity	GO:0005829//cytosol;GO:0005634//nucleus
CL1086.Contig1_All	3288	521	5.2933	487	4.6959	349	3.6346	gi|567140146|ref|XP_006394983.1|	1430.2	0	hypothetical protein EUTSA_v10003562mg [Eutrema salsugineum] >gi|557091622|gb|ESQ32269.1| hypothetical protein EUTSA_v10003562mg [Eutrema salsugineum]	gi|332002898|gb|CP002688.1|	478	1e-131	Arabidopsis thaliana chromosome 5, complete sequence	sp|Q9FH28|DNJ49_ARATH	67.4	1e-11	Chaperone protein dnaJ 49 OS=Arabidopsis thaliana GN=ATJ49 PE=2 SV=2	slr0093	57.8	5e-08	COG2214	DnaJ-class molecular chaperone	K09518	3e-12	70.9	pop:POPTR_821728	DnaJ homolog subfamily B member 12	GO:0006457//protein folding;GO:0050896//response to stimulus	-	GO:0005737//cytoplasm
CL1086.Contig2_All	386	39	3.3752	36	2.9569	34	3.0161	gi|567140146|ref|XP_006394983.1|	51.6	1e-06	hypothetical protein EUTSA_v10003562mg [Eutrema salsugineum] >gi|557091622|gb|ESQ32269.1| hypothetical protein EUTSA_v10003562mg [Eutrema salsugineum]	gi|332002898|gb|CP002688.1|	200	9e-49	Arabidopsis thaliana chromosome 5, complete sequence	sp|Q9FH28|DNJ49_ARATH	50.8	2e-08	Chaperone protein dnaJ 49 OS=Arabidopsis thaliana GN=ATJ49 PE=2 SV=2	MA1479	57.8	3e-10	COG0484	DnaJ-class molecular chaperone with C-terminal Zn finger domain	K09518	1e-11	61.6	rcu:RCOM_0222530	DnaJ homolog subfamily B member 12	GO:0006457//protein folding;GO:0006950//response to stress;GO:0035335//peptidyl-tyrosine dephosphorylation	GO:0004725//protein tyrosine phosphatase activity	GO:0005737//cytoplasm
CL1086.Contig3_All	1225	166	4.5269	144	3.7269	116	3.2425	gi|567140146|ref|XP_006394983.1|	86.7	3e-16	hypothetical protein EUTSA_v10003562mg [Eutrema salsugineum] >gi|557091622|gb|ESQ32269.1| hypothetical protein EUTSA_v10003562mg [Eutrema salsugineum]	gi|332002898|gb|CP002688.1|	280	4e-72	Arabidopsis thaliana chromosome 5, complete sequence	--	--	--	--	--	--	--	--	--	--	--	--	--	--	GO:0009987//cellular process	-	-
CL1087.Contig1_All	316	0	0	12	1.204	0	0	--	--	--	--	gi|199580260|gb|AC189566.2|	58	7e-06	Brassica rapa subsp. pekinensis clone KBrH009D02, complete sequence	--	--	--	--	--	--	--	--	--	--	--	--	--	--	-	-	-
CL1087.Contig2_All	569	85	4.9904	322	17.9416	16	0.9629	gi|297826455|ref|XP_002881110.1|	105.9	2e-28	DNA binding protein [Arabidopsis lyrata subsp. lyrata] >gi|297326949|gb|EFH57369.1| DNA binding protein [Arabidopsis lyrata subsp. lyrata]	gi|297826454|ref|XM_002881064.1|	109	4e-21	Arabidopsis lyrata subsp. lyrata DNA binding protein, mRNA	sp|Q8GV05|TRY_ARATH	104	3e-29	Transcription factor TRY OS=Arabidopsis thaliana GN=TRY PE=1 SV=1	--	--	--	--	--	K09422	8e-29	104	ath:AT5G53200	myb proto-oncogene protein, plant	GO:1900033//negative regulation of trichome patterning;GO:2000039//regulation of trichome morphogenesis;GO:0080147//root hair cell development;GO:0001708//cell fate specification;GO:0045892//negative regulation of transcription, DNA-dependent;GO:0010091//trichome branching	GO:0003677//DNA binding;GO:0003700//sequence-specific DNA binding transcription factor activity;GO:0003682//chromatin binding	GO:0005634//nucleus
CL1088.Contig1_All	532	88	5.5258	264	15.733	98	6.3077	gi|567217538|ref|XP_006412398.1|	282	1e-96	hypothetical protein EUTSA_v10026405mg [Eutrema salsugineum] >gi|557113568|gb|ESQ53851.1| hypothetical protein EUTSA_v10026405mg [Eutrema salsugineum]	gi|332656411|gb|CP002687.1|	523	1e-146	Arabidopsis thaliana chromosome 4, complete genome	sp|Q8L9S3|GRXC6_ARATH	263	2e-91	Glutaredoxin-C6 OS=Arabidopsis thaliana GN=GRXC6 PE=2 SV=2	--	--	--	--	--	K03676	9e-15	67.8	smo:SELMODRAFT_229902	glutaredoxin 3	GO:0045454//cell redox homeostasis;GO:0048653//anther development;GO:0055114//oxidation-reduction process	GO:0009055//electron carrier activity;GO:0015035//protein disulfide oxidoreductase activity	GO:0005737//cytoplasm
CL1088.Contig2_All	543	217	13.3501	137	7.9991	32	2.0179	gi|567217538|ref|XP_006412398.1|	255.8	2e-86	hypothetical protein EUTSA_v10026405mg [Eutrema salsugineum] >gi|557113568|gb|ESQ53851.1| hypothetical protein EUTSA_v10026405mg [Eutrema salsugineum]	gi|199580259|gb|AC189565.2|	678	0	Brassica rapa subsp. pekinensis clone KBrH009C15, complete sequence	sp|Q8L9S3|GRXC6_ARATH	246	7e-85	Glutaredoxin-C6 OS=Arabidopsis thaliana GN=GRXC6 PE=2 SV=2	YBR014c	46.6	5e-06	COG0695	Glutaredoxin and related proteins	K03676	3e-13	63.9	bdi:100821530	glutaredoxin 3	GO:0045454//cell redox homeostasis;GO:0048653//anther development;GO:0055114//oxidation-reduction process	GO:0009055//electron carrier activity;GO:0015035//protein disulfide oxidoreductase activity	GO:0005737//cytoplasm
CL1089.Contig10_All	2941	0	0	0	0	0	0	gi|567147017|ref|XP_006415679.1|	1338.5	0	hypothetical protein EUTSA_v10006751mg [Eutrema salsugineum] >gi|557093450|gb|ESQ34032.1| hypothetical protein EUTSA_v10006751mg [Eutrema salsugineum]	gi|79354735|ref|NM_102591.4|	799	0	Arabidopsis thaliana Telomerase activating protein Est1 mRNA, complete cds	--	--	--	--	--	--	--	--	--	K14409	5e-64	238	ppp:PHYPADRAFT_96795	protein SMG7	-	-	GO:0005634//nucleus
CL1089.Contig11_All	2968	40	0.4502	8	0.0855	6	0.0692	gi|567147017|ref|XP_006415679.1|	1403.3	0	hypothetical protein EUTSA_v10006751mg [Eutrema salsugineum] >gi|557093450|gb|ESQ34032.1| hypothetical protein EUTSA_v10006751mg [Eutrema salsugineum]	gi|297851267|ref|XM_002893469.1|	1629	0	Arabidopsis lyrata subsp. lyrata binding protein, mRNA	--	--	--	--	--	--	--	--	--	K14409	3e-64	238	ppp:PHYPADRAFT_96795	protein SMG7	-	-	GO:0005634//nucleus
CL1089.Contig12_All	1835	76	1.3836	25	0.4319	4	0.0746	gi|567147017|ref|XP_006415679.1|	957.2	0	hypothetical protein EUTSA_v10006751mg [Eutrema salsugineum] >gi|557093450|gb|ESQ34032.1| hypothetical protein EUTSA_v10006751mg [Eutrema salsugineum]	gi|79354735|ref|NM_102591.4|	1187	0	Arabidopsis thaliana Telomerase activating protein Est1 mRNA, complete cds	--	--	--	--	--	--	--	--	--	K14409	6e-48	182	ppp:PHYPADRAFT_96795	protein SMG7	-	-	GO:0005634//nucleus
CL1089.Contig13_All	507	33	2.1744	12	0.7504	4	0.2702	gi|297851268|ref|XP_002893515.1|	204.5	5e-60	binding protein [Arabidopsis lyrata subsp. lyrata] >gi|297339357|gb|EFH69774.1| binding protein [Arabidopsis lyrata subsp. lyrata]	gi|79354735|ref|NM_102591.4|	331	5e-88	Arabidopsis thaliana Telomerase activating protein Est1 mRNA, complete cds	--	--	--	--	--	--	--	--	--	K14409	8e-13	66.6	ppp:PHYPADRAFT_96795	protein SMG7	-	-	GO:0005634//nucleus
CL1089.Contig1_All	580	123	7.0844	30	1.6399	12	0.7085	gi|567147017|ref|XP_006415679.1|	193	2e-55	hypothetical protein EUTSA_v10006751mg [Eutrema salsugineum] >gi|557093450|gb|ESQ34032.1| hypothetical protein EUTSA_v10006751mg [Eutrema salsugineum]	gi|297851267|ref|XM_002893469.1|	289	2e-75	Arabidopsis lyrata subsp. lyrata binding protein, mRNA	--	--	--	--	--	--	--	--	--	K14409	9e-08	52.8	ppp:PHYPADRAFT_96795	protein SMG7	-	-	GO:0005634//nucleus
CL1089.Contig2_All	2325	18	0.2586	4	0.0545	2	0.0295	gi|567147017|ref|XP_006415679.1|	1093.6	0	hypothetical protein EUTSA_v10006751mg [Eutrema salsugineum] >gi|557093450|gb|ESQ34032.1| hypothetical protein EUTSA_v10006751mg [Eutrema salsugineum]	gi|79354735|ref|NM_102591.4|	799	0	Arabidopsis thaliana Telomerase activating protein Est1 mRNA, complete cds	--	--	--	--	--	--	--	--	--	K14409	2e-61	226	ppp:PHYPADRAFT_96795	protein SMG7	-	-	GO:0005634//nucleus
CL1089.Contig3_All	2936	0	0	0	0	0	0	gi|567147017|ref|XP_006415679.1|	1334.3	0	hypothetical protein EUTSA_v10006751mg [Eutrema salsugineum] >gi|557093450|gb|ESQ34032.1| hypothetical protein EUTSA_v10006751mg [Eutrema salsugineum]	gi|79354735|ref|NM_102591.4|	799	0	Arabidopsis thaliana Telomerase activating protein Est1 mRNA, complete cds	--	--	--	--	--	--	--	--	--	K14409	1e-63	236	ppp:PHYPADRAFT_96795	protein SMG7	-	-	GO:0005634//nucleus
CL1089.Contig4_All	1794	0	0	0	0	0	0	gi|567147017|ref|XP_006415679.1|	715.3	0	hypothetical protein EUTSA_v10006751mg [Eutrema salsugineum] >gi|557093450|gb|ESQ34032.1| hypothetical protein EUTSA_v10006751mg [Eutrema salsugineum]	gi|297822500|ref|XM_002879087.1|	513	1e-142	Arabidopsis lyrata subsp. lyrata binding protein, mRNA	--	--	--	--	--	--	--	--	--	K14409	1e-10	65.9	mtr:MTR_5g089510	protein SMG7	-	-	GO:0005634//nucleus
CL1089.Contig5_All	2989	0	0	0	0	0	0	gi|567147017|ref|XP_006415679.1|	1416.4	0	hypothetical protein EUTSA_v10006751mg [Eutrema salsugineum] >gi|557093450|gb|ESQ34032.1| hypothetical protein EUTSA_v10006751mg [Eutrema salsugineum]	gi|297851267|ref|XM_002893469.1|	1691	0	Arabidopsis lyrata subsp. lyrata binding protein, mRNA	--	--	--	--	--	--	--	--	--	K14409	6e-64	238	ppp:PHYPADRAFT_96795	protein SMG7	-	-	GO:0005634//nucleus
CL1089.Contig6_All	1204	2	0.0555	0	0	0	0	gi|567147017|ref|XP_006415679.1|	487.6	7e-164	hypothetical protein EUTSA_v10006751mg [Eutrema salsugineum] >gi|557093450|gb|ESQ34032.1| hypothetical protein EUTSA_v10006751mg [Eutrema salsugineum]	gi|297822500|ref|XM_002879087.1|	513	1e-142	Arabidopsis lyrata subsp. lyrata binding protein, mRNA	--	--	--	--	--	--	--	--	--	K14409	6e-11	65.9	mtr:MTR_5g089510	protein SMG7	-	-	GO:0005634//nucleus
CL1089.Contig7_All	1799	0	0	0	0	0	0	gi|567147017|ref|XP_006415679.1|	719.5	0	hypothetical protein EUTSA_v10006751mg [Eutrema salsugineum] >gi|557093450|gb|ESQ34032.1| hypothetical protein EUTSA_v10006751mg [Eutrema salsugineum]	gi|297822500|ref|XM_002879087.1|	513	1e-142	Arabidopsis lyrata subsp. lyrata binding protein, mRNA	--	--	--	--	--	--	--	--	--	K14409	1e-10	65.9	mtr:MTR_5g089510	protein SMG7	-	-	GO:0005634//nucleus
CL1089.Contig8_All	789	251	10.6273	75	3.0137	12	0.5208	gi|565493758|ref|XP_006304518.1|	371.3	5e-121	hypothetical protein CARUB_v10011353mg [Capsella rubella] >gi|482573229|gb|EOA37416.1| hypothetical protein CARUB_v10011353mg [Capsella rubella]	gi|297851267|ref|XM_002893469.1|	194	1e-46	Arabidopsis lyrata subsp. lyrata binding protein, mRNA	--	--	--	--	--	--	--	--	--	--	--	--	--	--	-	-	GO:0005634//nucleus
CL1089.Contig9_All	2984	71	0.7948	24	0.255	6	0.0689	gi|567147017|ref|XP_006415679.1|	1413.7	0	hypothetical protein EUTSA_v10006751mg [Eutrema salsugineum] >gi|557093450|gb|ESQ34032.1| hypothetical protein EUTSA_v10006751mg [Eutrema salsugineum]	gi|297851267|ref|XM_002893469.1|	1699	0	Arabidopsis lyrata subsp. lyrata binding protein, mRNA	--	--	--	--	--	--	--	--	--	K14409	4e-64	238	ppp:PHYPADRAFT_96795	protein SMG7	-	-	GO:0005634//nucleus
CL109.Contig1_All	281	17	2.021	11	1.2411	11	1.3404	--	--	--	--	gi|488786|emb|X79330.1|	63.9	9e-08	B.oleracea putative imbibition protein mRNA	--	--	--	--	--	--	--	--	--	--	--	--	--	--	-	-	-
CL109.Contig2_All	1002	30	1.0002	14	0.443	10	0.3417	gi|9755617|emb|CAC01771.1|	107.8	1e-24	putative protein [Arabidopsis thaliana]	gi|289629346|gb|AC240087.1|	315	6e-83	Brassica oleracea clone BOT01-44D22, complete sequence	sp|Q8LFJ9|GLIP7_ARATH	114	1e-38	GDSL esterase/lipase 7 OS=Arabidopsis thaliana GN=GLIP7 PE=2 SV=1	--	--	--	--	--	--	--	--	--	--	GO:0006629//lipid metabolic process	GO:0016298//lipase activity	GO:0005576//extracellular region
CL109.Contig3_All	973	13	0.4463	7	0.2281	17	0.5983	gi|9755617|emb|CAC01771.1|	107.8	9e-25	putative protein [Arabidopsis thaliana]	gi|289629346|gb|AC240087.1|	375	1e-101	Brassica oleracea clone BOT01-44D22, complete sequence	sp|Q8LFJ9|GLIP7_ARATH	116	2e-39	GDSL esterase/lipase 7 OS=Arabidopsis thaliana GN=GLIP7 PE=2 SV=1	--	--	--	--	--	--	--	--	--	--	GO:0006629//lipid metabolic process	GO:0016298//lipase activity	GO:0005576//extracellular region
CL109.Contig4_All	522	11	0.704	25	1.5184	19	1.2464	--	--	--	--	gi|488786|emb|X79330.1|	63.9	2e-07	B.oleracea putative imbibition protein mRNA	--	--	--	--	--	--	--	--	--	--	--	--	--	--	-	-	-
CL109.Contig5_All	1057	14	0.4425	19	0.5699	12	0.3887	gi|297811709|ref|XP_002873738.1|	97.8	1e-59	GDSL-motif lipase 7 [Arabidopsis lyrata subsp. lyrata] >gi|297319575|gb|EFH49997.1| GDSL-motif lipase 7 [Arabidopsis lyrata subsp. lyrata]	gi|289629346|gb|AC240087.1|	640	0	Brassica oleracea clone BOT01-44D22, complete sequence	sp|Q8LFJ9|GLIP7_ARATH	154	9e-61	GDSL esterase/lipase 7 OS=Arabidopsis thaliana GN=GLIP7 PE=2 SV=1	--	--	--	--	--	K01206	3e-06	45.4	ath:AT1G67830	alpha-L-fucosidase [EC:3.2.1.51]	GO:0006629//lipid metabolic process	GO:0016298//lipase activity	GO:0005576//extracellular region
CL109.Contig6_All	1081	0	0	0	0	4	0.1267	gi|297811709|ref|XP_002873738.1|	107.8	1e-62	GDSL-motif lipase 7 [Arabidopsis lyrata subsp. lyrata] >gi|297319575|gb|EFH49997.1| GDSL-motif lipase 7 [Arabidopsis lyrata subsp. lyrata]	gi|289629346|gb|AC240087.1|	676	0	Brassica oleracea clone BOT01-44D22, complete sequence	sp|Q8LFJ9|GLIP7_ARATH	154	9e-64	GDSL esterase/lipase 7 OS=Arabidopsis thaliana GN=GLIP7 PE=2 SV=1	--	--	--	--	--	K01206	2e-08	45.4	ath:AT1G67830	alpha-L-fucosidase [EC:3.2.1.51]	GO:0006629//lipid metabolic process	GO:0016298//lipase activity	GO:0005576//extracellular region
CL109.Contig7_All	836	160	6.3935	174	6.5987	146	5.9801	--	--	--	--	gi|488786|emb|X79330.1|	73.8	3e-10	B.oleracea putative imbibition protein mRNA	--	--	--	--	--	--	--	--	--	--	--	--	--	--	-	-	-
CL109.Contig8_All	709	6	0.2827	12	0.5366	29	1.4006	--	--	--	--	gi|171921112|gb|EU579455.1|	67.9	2e-08	Brassica oleracea clone BAC B77C13, complete sequence	--	--	--	--	--	--	--	--	--	--	--	--	--	--	-	-	-
CL1090.Contig1_All	2740	600	7.3152	189	2.1869	750	9.3728	gi|567153013|ref|XP_006417366.1|	1479.5	0	hypothetical protein EUTSA_v10006785mg [Eutrema salsugineum] >gi|557095137|gb|ESQ35719.1| hypothetical protein EUTSA_v10006785mg [Eutrema salsugineum]	gi|297843963|ref|XM_002889817.1|	2290	0	Arabidopsis lyrata subsp. lyrata S-locus lectin protein kinase family protein, mRNA	sp|Q9SXB8|Y1133_ARATH	1443	0	G-type lectin S-receptor-like serine/threonine-protein kinase At1g11330 OS=Arabidopsis thaliana GN=At1g11330 PE=1 SV=3	BS_yloP_1	99.8	6e-22	COG0515	Serine/threonine protein kinase	K13430	7e-68	236	zma:100283091	serine/threonine-protein kinase PBS1 [EC:2.7.11.1]	GO:0046777//protein autophosphorylation;GO:0016556//mRNA modification;GO:0009637//response to blue light;GO:0010155//regulation of proton transport;GO:0048544//recognition of pollen	GO:0004674//protein serine/threonine kinase activity;GO:0005524//ATP binding;GO:0030246//carbohydrate binding	GO:0005886//plasma membrane
CL1090.Contig2_All	625	81	4.3294	1	0.0507	0	0	gi|110739551|dbj|BAF01684.1|	298.9	4e-97	putative receptor-like protein kinase [Arabidopsis thaliana]	gi|334182460|ref|NM_001198033.1|	537	1e-150	Arabidopsis thaliana G-type lectin S-receptor-like serine/threonine-protein kinase mRNA, complete cds	sp|Q9SXB8|Y1133_ARATH	298	1e-96	G-type lectin S-receptor-like serine/threonine-protein kinase At1g11330 OS=Arabidopsis thaliana GN=At1g11330 PE=1 SV=3	--	--	--	--	--	K13430	2e-19	87	pop:POPTR_548061	serine/threonine-protein kinase PBS1 [EC:2.7.11.1]	GO:0046777//protein autophosphorylation;GO:0016556//mRNA modification;GO:0071446//cellular response to salicylic acid stimulus;GO:0009637//response to blue light;GO:0010155//regulation of proton transport;GO:0048544//recognition of pollen;GO:0009816//defense response to bacterium, incompatible interaction	GO:0004674//protein serine/threonine kinase activity;GO:0031625//ubiquitin protein ligase binding;GO:0005524//ATP binding;GO:0030246//carbohydrate binding	GO:0005886//plasma membrane
CL1090.Contig3_All	401	5	0.4165	30	2.3719	12	1.0247	gi|565494142|ref|XP_006304710.1|	176.4	1e-50	hypothetical protein CARUB_v10011980mg, partial [Capsella rubella] >gi|482573421|gb|EOA37608.1| hypothetical protein CARUB_v10011980mg, partial [Capsella rubella]	gi|332189094|gb|CP002684.1|	319	1e-84	Arabidopsis thaliana chromosome 1, complete sequence	sp|Q9SXB8|Y1133_ARATH	171	2e-50	G-type lectin S-receptor-like serine/threonine-protein kinase At1g11330 OS=Arabidopsis thaliana GN=At1g11330 PE=1 SV=3	--	--	--	--	--	--	--	--	--	--	GO:0046777//protein autophosphorylation;GO:0016556//mRNA modification;GO:0009637//response to blue light;GO:0010155//regulation of proton transport;GO:0048544//recognition of pollen	GO:0004674//protein serine/threonine kinase activity;GO:0005524//ATP binding;GO:0030246//carbohydrate binding	GO:0005886//plasma membrane
CL1090.Contig4_All	410	0	0	13	1.0053	27	2.255	gi|110739551|dbj|BAF01684.1|	218	4e-67	putative receptor-like protein kinase [Arabidopsis thaliana]	gi|334182460|ref|NM_001198033.1|	319	1e-84	Arabidopsis thaliana G-type lectin S-receptor-like serine/threonine-protein kinase mRNA, complete cds	sp|Q9SXB8|Y1133_ARATH	218	2e-67	G-type lectin S-receptor-like serine/threonine-protein kinase At1g11330 OS=Arabidopsis thaliana GN=At1g11330 PE=1 SV=3	--	--	--	--	--	K13418	6e-10	57	vvi:100247683	somatic embryogenesis receptor kinase 1 [EC:2.7.10.1 2.7.11.1]	GO:0046777//protein autophosphorylation;GO:0016556//mRNA modification;GO:0009637//response to blue light;GO:0010155//regulation of proton transport;GO:0048544//recognition of pollen	GO:0004674//protein serine/threonine kinase activity;GO:0005524//ATP binding;GO:0030246//carbohydrate binding	GO:0005886//plasma membrane
CL1091.Contig1_All	610	0	0	10	0.5197	120	6.7361	gi|311223156|gb|ADP76651.1|	343.2	2e-119	MYB2 [Brassica oleracea var. botrytis]	gi|326681538|gb|HQ337792.1|	505	1e-140	Brassica rapa subsp. rapa cultivar Tsuda production of anthocyanin pigment 1 (PAP1) mRNA, complete cds	sp|Q9FE25|MYB75_ARATH	303	3e-105	Transcription factor MYB75 OS=Arabidopsis thaliana GN=MYB75 PE=1 SV=1	ECU11g1690	78.2	2e-17	COG5147	Myb superfamily proteins, including transcription factors and mRNA splicing factors	K09422	1e-110	317	aly:ARALYDRAFT_894284	myb proto-oncogene protein, plant	GO:0016036//cellular response to phosphate starvation;GO:0010048//vernalization response;GO:0006995//cellular response to nitrogen starvation;GO:0009740//gibberellic acid mediated signaling pathway;GO:0009651//response to salt stress;GO:0080167//response to karrikin;GO:0001708//cell fate specification;GO:0050832//defense response to fungus;GO:0009913//epidermal cell differentiation;GO:0019430//re…	GO:0005515//protein binding;GO:0008195//phosphatidate phosphatase activity;GO:0003677//DNA binding;GO:0003700//sequence-specific DNA binding transcription factor activity;GO:0003682//chromatin binding;GO:0003993//acid phosphatase activity;GO:0004722//protein serine/threonine phosphatase activity	GO:0005887//integral to plasma membrane;GO:0009505//plant-type cell wall;GO:0009507//chloroplast;GO:0005576//extracellular region;GO:0005829//cytosol;GO:0005634//nucleus;GO:0005739//mitochondrion
CL1091.Contig2_All	219	0	0	11	1.5925	5	0.7818	gi|311223156|gb|ADP76651.1|	139.4	2e-41	MYB2 [Brassica oleracea var. botrytis]	gi|326681538|gb|HQ337792.1|	303	4e-80	Brassica rapa subsp. rapa cultivar Tsuda production of anthocyanin pigment 1 (PAP1) mRNA, complete cds	sp|Q9ZTC3|MYB90_ARATH	124	3e-37	Transcription factor MYB90 OS=Arabidopsis thaliana GN=MYB90 PE=1 SV=1	ECU11g1690	54.7	3e-10	COG5147	Myb superfamily proteins, including transcription factors and mRNA splicing factors	K09422	3e-37	125	aly:ARALYDRAFT_894284	myb proto-oncogene protein, plant	GO:0016036//cellular response to phosphate starvation;GO:0010048//vernalization response;GO:0006995//cellular response to nitrogen starvation;GO:0009740//gibberellic acid mediated signaling pathway;GO:0009651//response to salt stress;GO:0080167//response to karrikin;GO:0001708//cell fate specification;GO:0050832//defense response to fungus;GO:0009913//epidermal cell differentiation;GO:0019430//re…	GO:0005515//protein binding;GO:0008195//phosphatidate phosphatase activity;GO:0003677//DNA binding;GO:0003700//sequence-specific DNA binding transcription factor activity;GO:0003682//chromatin binding;GO:0003993//acid phosphatase activity;GO:0004722//protein serine/threonine phosphatase activity	GO:0005887//integral to plasma membrane;GO:0009505//plant-type cell wall;GO:0009507//chloroplast;GO:0005576//extracellular region;GO:0005829//cytosol;GO:0005634//nucleus;GO:0005739//mitochondrion
CL1092.Contig1_All	1445	103	2.3812	84	1.843	84	1.9905	gi|332190220|gb|AEE28341.1|	699.9	0	peptidase C13-like protein [Arabidopsis thaliana] >gi|332190221|gb|AEE28342.1| peptidase C13-like protein [Arabidopsis thaliana] >gi|332190222|gb|AEE28343.1| peptidase C13-like protein [Arabidopsis thaliana]	gi|21403593|gb|AY084883.1|	1477	0	Arabidopsis thaliana clone 120167 mRNA, complete sequence	sp|P49047|VPEA_ARATH	101	5e-23	Vacuolar-processing enzyme alpha-isozyme OS=Arabidopsis thaliana GN=At2g25940 PE=2 SV=2	YDR331w	354	2e-118	COG5206	Glycosylphosphatidylinositol transamidase (GPIT), subunit GPI8	K05290	0	699	ath:AT1G08750	phosphatidylinositol glycan, class K [EC:2.6.-.-]	GO:0046520//sphingoid biosynthetic process;GO:0016255//attachment of GPI anchor to protein;GO:0006508//proteolysis;GO:0016126//sterol biosynthetic process	GO:0004197//cysteine-type endopeptidase activity;GO:0003923//GPI-anchor transamidase activity	GO:0042765//GPI-anchor transamidase complex
CL1093.Contig1_All	783	192	8.1915	0	0	0	0	gi|567160546|ref|XP_006396206.1|	370.9	6e-130	hypothetical protein EUTSA_v10028964mg [Eutrema salsugineum] >gi|557097223|gb|ESQ37659.1| hypothetical protein EUTSA_v10028964mg [Eutrema salsugineum]	gi|332656411|gb|CP002687.1|	541	1e-151	Arabidopsis thaliana chromosome 4, complete genome	sp|P17407|21KD_DAUCA	117	3e-32	21 kDa protein OS=Daucus carota PE=2 SV=1	--	--	--	--	--	K01051	3e-14	73.2	pop:POPTR_553829	pectinesterase [EC:3.1.1.11]	GO:0009741//response to brassinosteroid stimulus;GO:0009567//double fertilization forming a zygote and endosperm;GO:0000041//transition metal ion transport;GO:0043086//negative regulation of catalytic activity;GO:0009733//response to auxin stimulus	GO:0046910//pectinesterase inhibitor activity;GO:0030599//pectinesterase activity	-
CL1093.Contig2_All	282	20	2.3692	0	0	0	0	gi|567160546|ref|XP_006396206.1|	179.9	2e-57	hypothetical protein EUTSA_v10028964mg [Eutrema salsugineum] >gi|557097223|gb|ESQ37659.1| hypothetical protein EUTSA_v10028964mg [Eutrema salsugineum]	gi|332656411|gb|CP002687.1|	206	1e-50	Arabidopsis thaliana chromosome 4, complete genome	sp|P17407|21KD_DAUCA	61.2	6e-13	21 kDa protein OS=Daucus carota PE=2 SV=1	--	--	--	--	--	K01051	3e-06	45.1	vvi:100251413	pectinesterase [EC:3.1.1.11]	GO:0009741//response to brassinosteroid stimulus;GO:0009567//double fertilization forming a zygote and endosperm;GO:0000041//transition metal ion transport;GO:0043086//negative regulation of catalytic activity;GO:0009733//response to auxin stimulus	GO:0046910//pectinesterase inhibitor activity;GO:0030599//pectinesterase activity	-
CL1094.Contig1_All	1737	16	0.3077	30	0.5476	56	1.1039	gi|42567181|ref|NP_194464.3|	899.4	0	Met-10+ like family protein [Arabidopsis thaliana] >gi|75127148|sp|Q6NQ64.1|TRM52_ARATH RecName: Full=tRNA (guanine(37)-N1)-methyltransferase 2; AltName: Full=M1G-methyltransferase 2; AltName: Full=tRNA [GM37] methyltransferase 2; AltName: Full=tRNA methyltransferase 5 homolog 2; Flags: Precursor >gi|37202010|gb|AAQ89620.1| At4g27340 [Arabidopsis thaliana] >gi|332659926|gb|AEE85326.1| Met-10+ lik…	gi|145346316|ref|NM_118868.4|	1604	0	Arabidopsis thaliana Met-10+ like family protein mRNA, complete cds	sp|Q6NQ64|TRM52_ARATH	899	0	tRNA (guanine(37)-N1)-methyltransferase 2 OS=Arabidopsis thaliana GN=At4g27340 PE=2 SV=1	YHR070w	174	2e-47	COG2520	Predicted methyltransferase	K15429	0	899	ath:AT4G27340	tRNA (guanine37-N1)-methyltransferase [EC:2.1.1.228]	GO:0030488//tRNA methylation	GO:0052906//tRNA (guanine(37)-N(1))-methyltransferase activity	GO:0005759//mitochondrial matrix;GO:0005634//nucleus
CL1094.Contig2_All	1700	0	0	0	0	0	0	gi|42567181|ref|NP_194464.3|	899.4	0	Met-10+ like family protein [Arabidopsis thaliana] >gi|75127148|sp|Q6NQ64.1|TRM52_ARATH RecName: Full=tRNA (guanine(37)-N1)-methyltransferase 2; AltName: Full=M1G-methyltransferase 2; AltName: Full=tRNA [GM37] methyltransferase 2; AltName: Full=tRNA methyltransferase 5 homolog 2; Flags: Precursor >gi|37202010|gb|AAQ89620.1| At4g27340 [Arabidopsis thaliana] >gi|332659926|gb|AEE85326.1| Met-10+ lik…	gi|145346316|ref|NM_118868.4|	1596	0	Arabidopsis thaliana Met-10+ like family protein mRNA, complete cds	sp|Q6NQ64|TRM52_ARATH	899	0	tRNA (guanine(37)-N1)-methyltransferase 2 OS=Arabidopsis thaliana GN=At4g27340 PE=2 SV=1	YHR070w	174	2e-47	COG2520	Predicted methyltransferase	K15429	0	899	ath:AT4G27340	tRNA (guanine37-N1)-methyltransferase [EC:2.1.1.228]	GO:0030488//tRNA methylation	GO:0052906//tRNA (guanine(37)-N(1))-methyltransferase activity	GO:0005759//mitochondrial matrix;GO:0005634//nucleus
CL1094.Contig3_All	573	34	1.9822	19	1.0513	80	4.7807	gi|98961799|gb|ABF59229.1|	148.7	1e-41	unknown protein [Arabidopsis thaliana]	gi|199580265|gb|AC189570.2|	117	2e-23	Brassica rapa subsp. pekinensis clone KBrH009P18, complete sequence	sp|F4J9Q6|FKB43_ARATH	148	2e-42	Peptidyl-prolyl cis-trans isomerase FKBP43 OS=Arabidopsis thaliana GN=FKBP43 PE=2 SV=1	--	--	--	--	--	K14826	2e-10	60.1	sbi:SORBI_06g018020	FK506-binding nuclear protein [EC:5.2.1.8]	GO:0044699;GO:0044267//cellular protein metabolic process	-	GO:0044424//intracellular part
CL1094.Contig4_All	2108	0	0	0	0	0	0	gi|42567181|ref|NP_194464.3|	1060.4	0	Met-10+ like family protein [Arabidopsis thaliana] >gi|75127148|sp|Q6NQ64.1|TRM52_ARATH RecName: Full=tRNA (guanine(37)-N1)-methyltransferase 2; AltName: Full=M1G-methyltransferase 2; AltName: Full=tRNA [GM37] methyltransferase 2; AltName: Full=tRNA methyltransferase 5 homolog 2; Flags: Precursor >gi|37202010|gb|AAQ89620.1| At4g27340 [Arabidopsis thaliana] >gi|332659926|gb|AEE85326.1| Met-10+ lik…	gi|145346316|ref|NM_118868.4|	2018	0	Arabidopsis thaliana Met-10+ like family protein mRNA, complete cds	sp|Q6NQ64|TRM52_ARATH	1060	0	tRNA (guanine(37)-N1)-methyltransferase 2 OS=Arabidopsis thaliana GN=At4g27340 PE=2 SV=1	YHR070w	199	1e-55	COG2520	Predicted methyltransferase	K15429	0	1060	ath:AT4G27340	tRNA (guanine37-N1)-methyltransferase [EC:2.1.1.228]	GO:0030488//tRNA methylation	GO:0052906//tRNA (guanine(37)-N(1))-methyltransferase activity	GO:0005759//mitochondrial matrix;GO:0005634//nucleus
CL1094.Contig5_All	2149	89	1.3835	177	2.6113	257	4.095	gi|42567181|ref|NP_194464.3|	1063.1	0	Met-10+ like family protein [Arabidopsis thaliana] >gi|75127148|sp|Q6NQ64.1|TRM52_ARATH RecName: Full=tRNA (guanine(37)-N1)-methyltransferase 2; AltName: Full=M1G-methyltransferase 2; AltName: Full=tRNA [GM37] methyltransferase 2; AltName: Full=tRNA methyltransferase 5 homolog 2; Flags: Precursor >gi|37202010|gb|AAQ89620.1| At4g27340 [Arabidopsis thaliana] >gi|332659926|gb|AEE85326.1| Met-10+ lik…	gi|145346316|ref|NM_118868.4|	2034	0	Arabidopsis thaliana Met-10+ like family protein mRNA, complete cds	sp|Q6NQ64|TRM52_ARATH	1063	0	tRNA (guanine(37)-N1)-methyltransferase 2 OS=Arabidopsis thaliana GN=At4g27340 PE=2 SV=1	YHR070w	199	2e-55	COG2520	Predicted methyltransferase	K15429	0	1063	ath:AT4G27340	tRNA (guanine37-N1)-methyltransferase [EC:2.1.1.228]	GO:0030488//tRNA methylation	GO:0052906//tRNA (guanine(37)-N(1))-methyltransferase activity	GO:0005759//mitochondrial matrix;GO:0005634//nucleus
CL1094.Contig6_All	2397	0	0	0	0	0	0	gi|567218918|ref|XP_006413088.1|	845.9	0	hypothetical protein EUTSA_v10024701mg [Eutrema salsugineum] >gi|557114258|gb|ESQ54541.1| hypothetical protein EUTSA_v10024701mg [Eutrema salsugineum]	gi|145346316|ref|NM_118868.4|	1838	0	Arabidopsis thaliana Met-10+ like family protein mRNA, complete cds	sp|Q6NQ64|TRM52_ARATH	841	0	tRNA (guanine(37)-N1)-methyltransferase 2 OS=Arabidopsis thaliana GN=At4g27340 PE=2 SV=1	YHR070w	199	4e-55	COG2520	Predicted methyltransferase	K15429	0	841	ath:AT4G27340	tRNA (guanine37-N1)-methyltransferase [EC:2.1.1.228]	GO:0030488//tRNA methylation	GO:0052906//tRNA (guanine(37)-N(1))-methyltransferase activity	GO:0005759//mitochondrial matrix;GO:0005634//nucleus
CL1094.Contig7_All	969	19	0.655	31	1.0143	20	0.7067	gi|240255330|ref|NP_187840.7|	335.5	9e-111	FKBP-like peptidyl-prolyl cis-trans isomerase family protein [Arabidopsis thaliana] >gi|380876925|sp|F4J9Q6.1|FKB43_ARATH RecName: Full=Peptidyl-prolyl cis-trans isomerase FKBP43; Short=PPIase FKBP43; AltName: Full=FK506-binding protein 43; Short=AtFKBP43; AltName: Full=Immunophilin FKBP43; AltName: Full=Rotamase >gi|332641663|gb|AEE75184.1| FKBP-like peptidyl-prolyl cis-trans isomerase family pr…	gi|240255329|ref|NM_112068.8|	272	7e-70	Arabidopsis thaliana FKBP-like peptidyl-prolyl cis-trans isomerase family protein mRNA, complete cds	sp|F4J9Q6|FKB43_ARATH	335	1e-112	Peptidyl-prolyl cis-trans isomerase FKBP43 OS=Arabidopsis thaliana GN=FKBP43 PE=2 SV=1	--	--	--	--	--	K14826	8e-44	157	rcu:RCOM_1499110	FK506-binding nuclear protein [EC:5.2.1.8]	GO:0009560//embryo sac egg cell differentiation;GO:0000413//protein peptidyl-prolyl isomerization;GO:0042991//transcription factor import into nucleus;GO:0006312//mitotic recombination	GO:0003755//peptidyl-prolyl cis-trans isomerase activity;GO:0005528//FK506 binding	GO:0016020//membrane;GO:0005634//nucleus;GO:0009543//chloroplast thylakoid lumen
CL1094.Contig8_All	1585	141	2.9718	163	3.2604	136	2.9381	gi|240255330|ref|NP_187840.7|	538.5	0	FKBP-like peptidyl-prolyl cis-trans isomerase family protein [Arabidopsis thaliana] >gi|380876925|sp|F4J9Q6.1|FKB43_ARATH RecName: Full=Peptidyl-prolyl cis-trans isomerase FKBP43; Short=PPIase FKBP43; AltName: Full=FK506-binding protein 43; Short=AtFKBP43; AltName: Full=Immunophilin FKBP43; AltName: Full=Rotamase >gi|332641663|gb|AEE75184.1| FKBP-like peptidyl-prolyl cis-trans isomerase family pr…	gi|240255329|ref|NM_112068.8|	283	3e-73	Arabidopsis thaliana FKBP-like peptidyl-prolyl cis-trans isomerase family protein mRNA, complete cds	sp|F4J9Q6|FKB43_ARATH	538	0	Peptidyl-prolyl cis-trans isomerase FKBP43 OS=Arabidopsis thaliana GN=FKBP43 PE=2 SV=1	SPBC1347.02	97.8	1e-21	COG0545	FKBP-type peptidyl-prolyl cis-trans isomerases 1	K14826	2e-85	273	rcu:RCOM_1499110	FK506-binding nuclear protein [EC:5.2.1.8]	GO:0006312//mitotic recombination;GO:0009560//embryo sac egg cell differentiation;GO:0042991//transcription factor import into nucleus;GO:0000413//protein peptidyl-prolyl isomerization	GO:0005528//FK506 binding;GO:0003755//peptidyl-prolyl cis-trans isomerase activity	GO:0016020//membrane;GO:0009543//chloroplast thylakoid lumen;GO:0005634//nucleus
CL1094.Contig9_All	1989	0	0	0	0	0	0	gi|567218918|ref|XP_006413088.1|	691.8	0	hypothetical protein EUTSA_v10024701mg [Eutrema salsugineum] >gi|557114258|gb|ESQ54541.1| hypothetical protein EUTSA_v10024701mg [Eutrema salsugineum]	gi|145346316|ref|NM_118868.4|	1415	0	Arabidopsis thaliana Met-10+ like family protein mRNA, complete cds	sp|Q6NQ64|TRM52_ARATH	680	0	tRNA (guanine(37)-N1)-methyltransferase 2 OS=Arabidopsis thaliana GN=At4g27340 PE=2 SV=1	YHR070w	174	8e-47	COG2520	Predicted methyltransferase	K15429	0	680	ath:AT4G27340	tRNA (guanine37-N1)-methyltransferase [EC:2.1.1.228]	GO:0030488//tRNA methylation	GO:0052906//tRNA (guanine(37)-N(1))-methyltransferase activity	GO:0005759//mitochondrial matrix;GO:0005634//nucleus
CL1095.Contig1_All	1787	312	5.8325	623	11.053	360	6.8982	gi|297835890|ref|XP_002885827.1|	771.5	0	hypothetical protein ARALYDRAFT_480233 [Arabidopsis lyrata subsp. lyrata] >gi|297331667|gb|EFH62086.1| hypothetical protein ARALYDRAFT_480233 [Arabidopsis lyrata subsp. lyrata]	gi|330250293|gb|CP002685.1|	561	1e-156	Arabidopsis thaliana chromosome 2, complete sequence	sp|Q8GXZ3|Y5102_ARATH	447	9e-154	Serine/threonine-protein kinase At5g01020 OS=Arabidopsis thaliana GN=At5g01020 PE=1 SV=1	CAC0404_1	90.9	2e-19	COG0515	Serine/threonine protein kinase	K00924	2e-128	383	osa:4337593	[EC:2.7.1.-]	GO:0006468//protein phosphorylation	GO:0005524//ATP binding;GO:0004674//protein serine/threonine kinase activity	GO:0005886//plasma membrane
CL1095.Contig2_All	1702	477	9.3623	325	6.054	200	4.0237	gi|297835890|ref|XP_002885827.1|	781.2	0	hypothetical protein ARALYDRAFT_480233 [Arabidopsis lyrata subsp. lyrata] >gi|297331667|gb|EFH62086.1| hypothetical protein ARALYDRAFT_480233 [Arabidopsis lyrata subsp. lyrata]	gi|42470106|emb|BX819239.1|	581	1e-162	Arabidopsis thaliana Full-length cDNA Complete sequence from clone GSLTFB5ZB11 of Flowers and buds of strain col-0 of Arabidopsis thaliana (thale cress)	sp|Q8GXZ3|Y5102_ARATH	447	5e-154	Serine/threonine-protein kinase At5g01020 OS=Arabidopsis thaliana GN=At5g01020 PE=1 SV=1	CAC0404_1	94	2e-20	COG0515	Serine/threonine protein kinase	K00924	2e-128	382	osa:4337593	[EC:2.7.1.-]	GO:0006468//protein phosphorylation	GO:0005524//ATP binding;GO:0004674//protein serine/threonine kinase activity	GO:0005886//plasma membrane
CL1096.Contig1_All	501	6	0.4001	14	0.8859	2	0.1367	gi|567182441|ref|XP_006402393.1|	84.3	7e-18	hypothetical protein EUTSA_v10006037mg [Eutrema salsugineum] >gi|557103492|gb|ESQ43846.1| hypothetical protein EUTSA_v10006037mg [Eutrema salsugineum]	gi|82654458|gb|AC172877.1|	274	1e-70	Brassica rapa subsp. oleifera clone KBrH042F19, complete sequence	sp|Q3EAF9|P2C49_ARATH	81.6	1e-18	Probable protein phosphatase 2C 49 OS=Arabidopsis thaliana GN=At3g62260 PE=2 SV=1	--	--	--	--	--	--	--	--	--	--	GO:0010200//response to chitin;GO:0006470//protein dephosphorylation	GO:0046872//metal ion binding;GO:0004722//protein serine/threonine phosphatase activity	GO:0005739//mitochondrion
CL1096.Contig2_All	537	0	0	0	0	0	0	gi|567182441|ref|XP_006402393.1|	81.3	1e-16	hypothetical protein EUTSA_v10006037mg [Eutrema salsugineum] >gi|557103492|gb|ESQ43846.1| hypothetical protein EUTSA_v10006037mg [Eutrema salsugineum]	gi|82654458|gb|AC172877.1|	230	1e-57	Brassica rapa subsp. oleifera clone KBrH042F19, complete sequence	sp|Q3EAF9|P2C49_ARATH	78.6	2e-17	Probable protein phosphatase 2C 49 OS=Arabidopsis thaliana GN=At3g62260 PE=2 SV=1	--	--	--	--	--	--	--	--	--	--	GO:0010200//response to chitin;GO:0006470//protein dephosphorylation	GO:0046872//metal ion binding;GO:0004722//protein serine/threonine phosphatase activity	GO:0005739//mitochondrion
CL1097.Contig1_All	5128	8	0.0521	0	0	0	0	gi|567122544|ref|XP_006390656.1|	1638.2	0	hypothetical protein EUTSA_v10018056mg [Eutrema salsugineum] >gi|557087090|gb|ESQ27942.1| hypothetical protein EUTSA_v10018056mg [Eutrema salsugineum]	gi|160334207|gb|EU170440.1|	2585	0	Arabidopsis thaliana slow walker 2 (SWA2) mRNA, complete cds	sp|Q6L4F8|GBLPB_ORYSJ	63.9	3e-10	Guanine nucleotide-binding protein subunit beta-like protein B OS=Oryza sativa subsp. japonica GN=RACK1B PE=1 SV=1	SPAC4F10.09c	303	7e-86	COG5593	Nucleic-acid-binding protein possibly involved in ribosomal biogenesis	K14832	0	1538	ath:AT1G72440	ribosome biogenesis protein MAK21	GO:0010197//polar nucleus fusion	-	GO:0005730//nucleolus
CL1097.Contig2_All	3202	59	0.6155	40	0.3961	45	0.4812	gi|567139109|ref|XP_006394689.1|	984.6	0	hypothetical protein EUTSA_v10003733mg [Eutrema salsugineum] >gi|557091328|gb|ESQ31975.1| hypothetical protein EUTSA_v10003733mg [Eutrema salsugineum]	gi|334187900|ref|NM_180737.2|	1104	0	Arabidopsis thaliana transducin/WD40 domain-containing protein mRNA, complete cds	sp|Q9SCY5|KINB2_ARATH	495	3e-168	SNF1-related protein kinase regulatory subunit beta-2 OS=Arabidopsis thaliana GN=KINB2 PE=1 SV=1	all0283_3	84.3	6e-16	COG2319	FOG: WD40 repeat	K07199	3e-167	493	aly:ARALYDRAFT_915121	5'-AMP-activated protein kinase, regulatory beta subunit	GO:0016926//protein desumoylation;GO:0007165//signal transduction;GO:0050665//hydrogen peroxide biosynthetic process;GO:0010228//vegetative to reproductive phase transition of meristem	GO:0004871//signal transducer activity	GO:0005737//cytoplasm;GO:0005834//heterotrimeric G-protein complex
CL1097.Contig3_All	3181	155	1.6278	93	0.9269	180	1.9376	gi|567139109|ref|XP_006394689.1|	994.2	0	hypothetical protein EUTSA_v10003733mg [Eutrema salsugineum] >gi|557091328|gb|ESQ31975.1| hypothetical protein EUTSA_v10003733mg [Eutrema salsugineum]	gi|334187900|ref|NM_180737.2|	1626	0	Arabidopsis thaliana transducin/WD40 domain-containing protein mRNA, complete cds	sp|Q9SCY5|KINB2_ARATH	495	2e-168	SNF1-related protein kinase regulatory subunit beta-2 OS=Arabidopsis thaliana GN=KINB2 PE=1 SV=1	sll0163	92	5e-18	COG2319	FOG: WD40 repeat	K07199	2e-167	493	aly:ARALYDRAFT_915121	5'-AMP-activated protein kinase, regulatory beta subunit	GO:0016926//protein desumoylation;GO:0007165//signal transduction;GO:0050665//hydrogen peroxide biosynthetic process;GO:0010228//vegetative to reproductive phase transition of meristem	GO:0004871//signal transducer activity	GO:0005737//cytoplasm;GO:0005834//heterotrimeric G-protein complex
CL1098.Contig1_All	1997	192	3.2118	189	3.0006	83	1.4232	gi|567189700|ref|XP_006404470.1|	1019.2	0	hypothetical protein EUTSA_v10010249mg [Eutrema salsugineum] >gi|557105589|gb|ESQ45923.1| hypothetical protein EUTSA_v10010249mg [Eutrema salsugineum]	gi|145339112|ref|NM_114301.3|	1800	0	Arabidopsis thaliana uncharacterized protein mRNA, complete cds	--	--	--	--	--	--	--	--	--	--	--	--	--	--	GO:0006499//N-terminal protein myristoylation;GO:0009966//regulation of signal transduction;GO:0016485//protein processing;GO:0009853//photorespiration	-	GO:0016021//integral to membrane;GO:0005739//mitochondrion;GO:0009506//plasmodesma;GO:0005774//vacuolar membrane;GO:0005783//endoplasmic reticulum;GO:0005794//Golgi apparatus;GO:0005886//plasma membrane
CL1098.Contig2_All	2139	134	2.0928	159	2.3567	63	1.0085	gi|567189700|ref|XP_006404470.1|	1018.5	0	hypothetical protein EUTSA_v10010249mg [Eutrema salsugineum] >gi|557105589|gb|ESQ45923.1| hypothetical protein EUTSA_v10010249mg [Eutrema salsugineum]	gi|145339112|ref|NM_114301.3|	1824	0	Arabidopsis thaliana uncharacterized protein mRNA, complete cds	--	--	--	--	--	--	--	--	--	--	--	--	--	--	GO:0006499//N-terminal protein myristoylation;GO:0009966//regulation of signal transduction;GO:0016485//protein processing;GO:0009853//photorespiration	-	GO:0016021//integral to membrane;GO:0005739//mitochondrion;GO:0009506//plasmodesma;GO:0005774//vacuolar membrane;GO:0005783//endoplasmic reticulum;GO:0005794//Golgi apparatus;GO:0005886//plasma membrane
CL1098.Contig3_All	2096	8	0.1275	6	0.0908	4	0.0653	gi|567189700|ref|XP_006404470.1|	1000	0	hypothetical protein EUTSA_v10010249mg [Eutrema salsugineum] >gi|557105589|gb|ESQ45923.1| hypothetical protein EUTSA_v10010249mg [Eutrema salsugineum]	gi|145339112|ref|NM_114301.3|	1798	0	Arabidopsis thaliana uncharacterized protein mRNA, complete cds	--	--	--	--	--	--	--	--	--	K06171	4e-06	51.6	osa:4330658	nicastrin	GO:0006499//N-terminal protein myristoylation;GO:0009966//regulation of signal transduction;GO:0016485//protein processing;GO:0009853//photorespiration	-	GO:0016021//integral to membrane;GO:0005739//mitochondrion;GO:0009506//plasmodesma;GO:0005774//vacuolar membrane;GO:0005783//endoplasmic reticulum;GO:0005794//Golgi apparatus;GO:0005886//plasma membrane
CL1098.Contig4_All	2088	74	1.1839	51	0.7744	34	0.5576	gi|567189700|ref|XP_006404470.1|	1000.7	0	hypothetical protein EUTSA_v10010249mg [Eutrema salsugineum] >gi|557105589|gb|ESQ45923.1| hypothetical protein EUTSA_v10010249mg [Eutrema salsugineum]	gi|145339112|ref|NM_114301.3|	1774	0	Arabidopsis thaliana uncharacterized protein mRNA, complete cds	--	--	--	--	--	--	--	--	--	K06171	4e-06	51.6	osa:4330658	nicastrin	GO:0006499//N-terminal protein myristoylation;GO:0009966//regulation of signal transduction;GO:0016485//protein processing;GO:0009853//photorespiration	-	GO:0016021//integral to membrane;GO:0005739//mitochondrion;GO:0009506//plasmodesma;GO:0005774//vacuolar membrane;GO:0005783//endoplasmic reticulum;GO:0005794//Golgi apparatus;GO:0005886//plasma membrane
CL1099.Contig1_All	601	126	7.0036	67	3.5344	37	2.1081	--	--	--	--	gi|332189094|gb|CP002684.1|	258	7e-66	Arabidopsis thaliana chromosome 1, complete sequence	--	--	--	--	--	--	--	--	--	--	--	--	--	--	-	-	-
CL11.Contig1_All	2145	629	9.796	172	2.5423	105	1.6762	gi|455659382|gb|AGG35951.1|	808.9	0	CBL-interacting protein kinase 14 [Brassica napus]	gi|455659381|gb|KC414027.1|	1507	0	Brassica napus CBL-interacting protein kinase 14 (CIPK14.1) mRNA, complete cds	sp|Q9LZW4|CIPKE_ARATH	701	0	CBL-interacting serine/threonine-protein kinase 14 OS=Arabidopsis thaliana GN=CIPK14 PE=1 SV=1	ECU01g0630	143	8e-36	COG0515	Serine/threonine protein kinase	K00924	3e-119	365	osa:4342410	[EC:2.7.1.-]	GO:0010118//stomatal movement;GO:0050832//defense response to fungus;GO:0042742//defense response to bacterium;GO:0000956//nuclear-transcribed mRNA catabolic process;GO:0006355//regulation of transcription, DNA-dependent;GO:0006468//protein phosphorylation;GO:0010150//leaf senescence;GO:0009409//response to cold;GO:0019722//calcium-mediated signaling;GO:0000398//mRNA splicing, via spliceosome	GO:0004683//calmodulin-dependent protein kinase activity;GO:0003723//RNA binding;GO:0005516//calmodulin binding;GO:0005524//ATP binding	GO:0035061//interchromatin granule;GO:0016607//nuclear speck;GO:0005773//vacuole;GO:0009506//plasmodesma;GO:0005886//plasma membrane
CL11.Contig2_All	1976	405	6.8469	190	3.0485	69	1.1957	gi|455659382|gb|AGG35951.1|	808.9	0	CBL-interacting protein kinase 14 [Brassica napus]	gi|455659381|gb|KC414027.1|	1507	0	Brassica napus CBL-interacting protein kinase 14 (CIPK14.1) mRNA, complete cds	sp|Q9LZW4|CIPKE_ARATH	701	0	CBL-interacting serine/threonine-protein kinase 14 OS=Arabidopsis thaliana GN=CIPK14 PE=1 SV=1	ECU01g0630	143	6e-36	COG0515	Serine/threonine protein kinase	K00924	7e-120	365	osa:4342410	[EC:2.7.1.-]	GO:0010118//stomatal movement;GO:0050832//defense response to fungus;GO:0042742//defense response to bacterium;GO:0000956//nuclear-transcribed mRNA catabolic process;GO:0006355//regulation of transcription, DNA-dependent;GO:0006468//protein phosphorylation;GO:0010150//leaf senescence;GO:0009409//response to cold;GO:0019722//calcium-mediated signaling;GO:0000398//mRNA splicing, via spliceosome	GO:0004683//calmodulin-dependent protein kinase activity;GO:0003723//RNA binding;GO:0005516//calmodulin binding;GO:0005524//ATP binding	GO:0035061//interchromatin granule;GO:0016607//nuclear speck;GO:0005773//vacuole;GO:0009506//plasmodesma;GO:0005886//plasma membrane
CL110.Contig1_All	855	0	0	0	0	0	0	gi|567179737|ref|XP_006401686.1|	247.3	1e-81	hypothetical protein EUTSA_v10015388mg [Eutrema salsugineum] >gi|557102776|gb|ESQ43139.1| hypothetical protein EUTSA_v10015388mg [Eutrema salsugineum]	gi|297792734|ref|XM_002864206.1|	355	6e-95	Arabidopsis lyrata subsp. lyrata auxin-responsive family protein, mRNA	sp|P32295|ARG7_VIGRR	62.4	1e-12	Indole-3-acetic acid-induced protein ARG7 OS=Vigna radiata var. radiata GN=ARG7 PE=2 SV=1	--	--	--	--	--	K14488	4e-79	237	aly:ARALYDRAFT_495435	SAUR family protein	GO:0009733//response to auxin stimulus	-	-
CL110.Contig2_All	854	361	14.1213	778	28.8828	503	20.1683	gi|567179737|ref|XP_006401686.1|	246.5	2e-81	hypothetical protein EUTSA_v10015388mg [Eutrema salsugineum] >gi|557102776|gb|ESQ43139.1| hypothetical protein EUTSA_v10015388mg [Eutrema salsugineum]	gi|297792734|ref|XM_002864206.1|	293	2e-76	Arabidopsis lyrata subsp. lyrata auxin-responsive family protein, mRNA	sp|P32295|ARG7_VIGRR	65.1	2e-13	Indole-3-acetic acid-induced protein ARG7 OS=Vigna radiata var. radiata GN=ARG7 PE=2 SV=1	--	--	--	--	--	K14488	3e-78	234	aly:ARALYDRAFT_495435	SAUR family protein	GO:0009733//response to auxin stimulus	-	-
CL110.Contig3_All	932	1258	45.0909	599	20.3765	126	4.6293	gi|567179737|ref|XP_006401686.1|	243.8	5e-80	hypothetical protein EUTSA_v10015388mg [Eutrema salsugineum] >gi|557102776|gb|ESQ43139.1| hypothetical protein EUTSA_v10015388mg [Eutrema salsugineum]	gi|297792734|ref|XM_002864206.1|	355	6e-95	Arabidopsis lyrata subsp. lyrata auxin-responsive family protein, mRNA	sp|P32295|ARG7_VIGRR	62.4	2e-12	Indole-3-acetic acid-induced protein ARG7 OS=Vigna radiata var. radiata GN=ARG7 PE=2 SV=1	--	--	--	--	--	K14488	3e-77	233	aly:ARALYDRAFT_495435	SAUR family protein	GO:0009733//response to auxin stimulus	-	-
CL1100.Contig1_All	538	801	49.7365	834	49.1476	914	58.1731	gi|567168832|ref|XP_006398494.1|	166	9e-51	hypothetical protein EUTSA_v10001040mg [Eutrema salsugineum] >gi|557099583|gb|ESQ39947.1| hypothetical protein EUTSA_v10001040mg [Eutrema salsugineum]	gi|334184081|ref|NM_001202563.1|	258	6e-66	Arabidopsis thaliana ubiquinol-cytochrome c reductase hinge protein mRNA, complete cds	sp|P48504|QCR6_SOLTU	119	1e-35	Cytochrome b-c1 complex subunit 6 OS=Solanum tuberosum PE=1 SV=2	--	--	--	--	--	K00416	4e-42	136	aly:ARALYDRAFT_679246	ubiquinol-cytochrome c reductase subunit 6	GO:0006511//ubiquitin-dependent protein catabolic process;GO:0051788//response to misfolded protein;GO:0080129//proteasome core complex assembly;GO:0006122//mitochondrial electron transport, ubiquinol to cytochrome c;GO:0009060//aerobic respiration;GO:0009853//photorespiration;GO:0046686//response to cadmium ion;GO:0006096//glycolysis	GO:0008121//ubiquinol-cytochrome-c reductase activity	GO:0005750//mitochondrial respiratory chain complex III
CL1100.Contig2_All	552	72	4.3573	58	3.3312	69	4.2802	gi|21554004|gb|AAM63085.1|	146.4	1e-44	putative ubiquinol--cytochrome-c reductase [Arabidopsis thaliana]	gi|227204458|dbj|AK318966.1|	283	1e-73	Arabidopsis thaliana AT1G15120 mRNA, complete cds, clone: RAFL21-97-H10	sp|P48504|QCR6_SOLTU	118	2e-35	Cytochrome b-c1 complex subunit 6 OS=Solanum tuberosum PE=1 SV=2	--	--	--	--	--	K00416	4e-44	142	aly:ARALYDRAFT_679246	ubiquinol-cytochrome c reductase subunit 6	GO:0006511//ubiquitin-dependent protein catabolic process;GO:0051788//response to misfolded protein;GO:0080129//proteasome core complex assembly;GO:0006122//mitochondrial electron transport, ubiquinol to cytochrome c;GO:0009060//aerobic respiration;GO:0009853//photorespiration;GO:0046686//response to cadmium ion;GO:0006096//glycolysis	GO:0008121//ubiquinol-cytochrome-c reductase activity	GO:0005750//mitochondrial respiratory chain complex III
CL1101.Contig1_All	958	138	4.8121	0	0	0	0	gi|567185484|ref|XP_006403254.1|	520.4	0	hypothetical protein EUTSA_v10003183mg [Eutrema salsugineum] >gi|567185488|ref|XP_006403255.1| hypothetical protein EUTSA_v10003183mg [Eutrema salsugineum] >gi|557104367|gb|ESQ44707.1| hypothetical protein EUTSA_v10003183mg [Eutrema salsugineum] >gi|557104368|gb|ESQ44708.1| hypothetical protein EUTSA_v10003183mg [Eutrema salsugineum]	gi|199580288|gb|AC189591.2|	1076	0	Brassica rapa subsp. pekinensis clone KBrH013D23, complete sequence	sp|O48639|PHT13_ARATH	497	5e-176	Probable inorganic phosphate transporter 1-3 OS=Arabidopsis thaliana GN=PHT1-3 PE=2 SV=1	Ta0048	124	2e-31	COG0477	Permeases of the major facilitator superfamily	K08176	1e-175	497	ath:AT5G43360	MFS transporter, PHS family, inorganic phosphate transporter	GO:1901684//arsenate ion transmembrane transport;GO:0016036//cellular response to phosphate starvation;GO:0035435//phosphate ion transmembrane transport	GO:0015114//phosphate ion transmembrane transporter activity;GO:1901683//arsenate ion transmembrane transporter activity;GO:0005315//inorganic phosphate transmembrane transporter activity;GO:0005351//sugar:hydrogen symporter activity	GO:0005737//cytoplasm;GO:0005886//plasma membrane;GO:0016021//integral to membrane
CL1101.Contig2_All	1367	1161	28.3719	0	0	0	0	gi|567185472|ref|XP_006403250.1|	786.2	0	hypothetical protein EUTSA_v10003336mg, partial [Eutrema salsugineum] >gi|557104363|gb|ESQ44703.1| hypothetical protein EUTSA_v10003336mg, partial [Eutrema salsugineum]	gi|199580288|gb|AC189591.2|	1516	0	Brassica rapa subsp. pekinensis clone KBrH013D23, complete sequence	sp|O48639|PHT13_ARATH	763	0	Probable inorganic phosphate transporter 1-3 OS=Arabidopsis thaliana GN=PHT1-3 PE=2 SV=1	Ta0048	204	7e-60	COG0477	Permeases of the major facilitator superfamily	K08176	0	763	ath:AT5G43360	MFS transporter, PHS family, inorganic phosphate transporter	GO:1901684//arsenate ion transmembrane transport;GO:0016036//cellular response to phosphate starvation;GO:0035435//phosphate ion transmembrane transport	GO:0015114//phosphate ion transmembrane transporter activity;GO:1901683//arsenate ion transmembrane transporter activity;GO:0005315//inorganic phosphate transmembrane transporter activity;GO:0005351//sugar:hydrogen symporter activity	GO:0005737//cytoplasm;GO:0005886//plasma membrane;GO:0016021//integral to membrane
CL1101.Contig3_All	688	43	2.0879	1	0.0461	0	0	gi|567185484|ref|XP_006403254.1|	455.7	3e-159	hypothetical protein EUTSA_v10003183mg [Eutrema salsugineum] >gi|567185488|ref|XP_006403255.1| hypothetical protein EUTSA_v10003183mg [Eutrema salsugineum] >gi|557104367|gb|ESQ44707.1| hypothetical protein EUTSA_v10003183mg [Eutrema salsugineum] >gi|557104368|gb|ESQ44708.1| hypothetical protein EUTSA_v10003183mg [Eutrema salsugineum]	gi|199580288|gb|AC189591.2|	745	0	Brassica rapa subsp. pekinensis clone KBrH013D23, complete sequence	sp|O48639|PHT13_ARATH	433	2e-152	Probable inorganic phosphate transporter 1-3 OS=Arabidopsis thaliana GN=PHT1-3 PE=2 SV=1	Ta0048	110	1e-27	COG0477	Permeases of the major facilitator superfamily	K08176	6e-152	433	ath:AT5G43360	MFS transporter, PHS family, inorganic phosphate transporter	GO:1901684//arsenate ion transmembrane transport;GO:0016036//cellular response to phosphate starvation;GO:0035435//phosphate ion transmembrane transport	GO:0015114//phosphate ion transmembrane transporter activity;GO:1901683//arsenate ion transmembrane transporter activity;GO:0005315//inorganic phosphate transmembrane transporter activity;GO:0005351//sugar:hydrogen symporter activity	GO:0005737//cytoplasm;GO:0005886//plasma membrane;GO:0016021//integral to membrane
[truncated: 47,463 more rows]

## Sheet: Table S3
Table S3 Root-specific-expressed genes
[truncated: 1,650 more rows]

## Sheet: Table S4
Table S4 GO enrichment of inter-tissue differentially expressed genes.
			inter-tissue differential expressed genes enrichment
	GO ID	GO Term	root-stem	stem-leaf	root-leaf
cellular component	GO:0000322	storage vacuole	8.01e-05
	GO:0000323	lytic vacuole	0.00068
	GO:0000325	plant-type vacuole	0.00041
	GO:0000326	protein storage vacuole	8.01e-05
	GO:0005618	cell wall	1.76e-05
	GO:0010168	ER body	0.00021
[truncated: 126 more rows]

## Sheet: Table S5
Table S5 Pathway enrichment of inter-tissue differentially expressed genes.
[truncated: 52 more rows]

[truncated: 3 more sheets: Table S6, Table S7, Table S8]
